# Supplementary material for: Identification of biomarkers associated with endoplasmic reticulum stress-related cell death in osteoporosis based on bulk and single-cell transcriptomic analyses and experimental validation
Source: Research Square preprint supplement (doi:10.21203/rs.3.rs-8454279/v1), 2026-01-12
Supplement: Supplementary file 1 [file 07662c45cd4050407d2b412c.xlsx]

## Sheet: 04_kegg-enrich
Supplementary Table 5
ID	Description	BgRatio	pvalue	p.adjust	qvalue	geneID	Count
hsa05213	Endometrial cancer	59/9396	3.9636036623062e-07	5.58868116385174e-05	3.21260507365871e-05	FOXO3/EGFR/PTEN/CCND1/CTNNB1	5
hsa05210	Colorectal cancer	87/9396	2.78304574240637e-06	0.000196204724839649	0.000112786590613311	RAC1/EGFR/APPL1/CCND1/CTNNB1	5
hsa05208	Chemical carcinogenesis - reactive oxygen species	227/9396	2.24306318763907e-05	0.00105423969819036	0.00060602058052003	FOXO3/RAC1/EGFR/PTEN/HMOX1/SLC25A5	6
hsa05225	Hepatocellular carcinoma	170/9396	7.24202484518463e-05	0.00255281375792758	0.00146746292915583	EGFR/PTEN/HMOX1/CCND1/CTNNB1	5
hsa05215	Prostate cancer	106/9396	0.000161288104544325	0.00337135962531372	0.0019379969477354	EGFR/PTEN/CCND1/CTNNB1	4
hsa05219	Bladder cancer	41/9396	0.000165938940072948	0.00337135962531372	0.0019379969477354	EGFR/DAPK3/CCND1	3
hsa04510	Focal adhesion	203/9396	0.000167372463668057	0.00337135962531372	0.0019379969477354	RAC1/EGFR/PTEN/CCND1/CTNNB1	5
hsa00860	Porphyrin metabolism	46/9396	0.000234234153270829	0.00412837695139837	0.0023731618160334	HMOX1/CP/FXN	3
hsa04071	Sphingolipid signaling pathway	122/9396	0.000277110998184268	0.00434140563822019	0.00249561951581153	RAC1/SGPL1/PTEN/CTSD	4
hsa04068	FoxO signaling pathway	133/9396	0.000385350502062914	0.00543344207908709	0.00312336722724678	FOXO3/EGFR/PTEN/CCND1	4
hsa04936	Alcoholic liver disease	144/9396	0.000521022312095781	0.00667855872777319	0.00383911177333733	FOXO3/CAMKK2/CCND1/CTNNB1	4
hsa05224	Breast cancer	148/9396	0.000577876976492129	0.00679005447378252	0.00390320413946438	EGFR/PTEN/CCND1/CTNNB1	4
hsa04218	Cellular senescence	157/9396	0.000721777641752208	0.00782851134515856	0.00450015209837409	FOXO3/PTEN/SLC25A5/CCND1	4
hsa05218	Melanoma	73/9396	0.000915302191913898	0.00837368065177174	0.00481353796331784	EGFR/PTEN/CCND1	3
hsa05223	Non-small cell lung cancer	73/9396	0.000915302191913898	0.00837368065177174	0.00481353796331784	FOXO3/EGFR/CCND1	3
hsa04140	Autophagy - animal	169/9396	0.000951046384973404	0.00837368065177174	0.00481353796331784	CAMKK2/PTEN/CTSD/DAPK3	4
hsa05214	Glioma	76/9396	0.00102913508743401	0.00837368065177174	0.00481353796331784	EGFR/PTEN/CCND1	3
hsa05212	Pancreatic cancer	77/9396	0.00106898050873682	0.00837368065177174	0.00481353796331784	RAC1/EGFR/CCND1	3
hsa01521	EGFR tyrosine kinase inhibitor resistance	80/9396	0.00119434899806154	0.0088633267750883	0.00509500680613512	FOXO3/EGFR/PTEN	3
hsa05206	MicroRNAs in cancer	318/9396	0.00130803787848315	0.00922166704330619	0.00530099561280013	EGFR/PTEN/HMOX1/TP63/CCND1	5
hsa04211	Longevity regulating pathway	90/9396	0.00167811307153063	0.0112673306231342	0.0064769276445042	FOXO3/CAMKK2/APPL1	3
hsa04520	Adherens junction	93/9396	0.00184388878257208	0.0114124796577251	0.00656036531276473	RAC1/EGFR/CTNNB1	3
hsa05205	Proteoglycans in cancer	204/9396	0.00190806561504883	0.0114124796577251	0.00656036531276473	RAC1/EGFR/CCND1/CTNNB1	4
hsa05415	Diabetic cardiomyopathy	205/9396	0.00194254972897449	0.0114124796577251	0.00656036531276473	RAC1/PTEN/CTSD/SLC25A5	4
hsa04151	PI3K-Akt signaling pathway	362/9396	0.00231928098525336	0.013080744756829	0.00751935308903195	FOXO3/RAC1/EGFR/PTEN/CCND1	5
hsa05163	Human cytomegalovirus infection	226/9396	0.00277093081963156	0.0150269709833865	0.0086381244174749	RAC1/EGFR/CCND1/CTNNB1	4
hsa04722	Neurotrophin signaling pathway	120/9396	0.00380622033681821	0.0198769284256062	0.011426080543275	FOXO3/RAC1/RIPK2	3
hsa04152	AMPK signaling pathway	122/9396	0.00398739880410198	0.0200794011206564	0.0115424702224005	FOXO3/CAMKK2/CCND1	3
hsa05131	Shigellosis	253/9396	0.00415798090878758	0.0200958257008426	0.011551911750391	FOXO3/RAC1/EGFR/RIPK2	4
hsa05216	Thyroid cancer	37/9396	0.00427570759592395	0.0200958257008426	0.011551911750391	CCND1/CTNNB1	2
hsa04216	Ferroptosis	42/9396	0.00548284943595196	0.0249381216280395	0.0143354637204856	HMOX1/CP	2
hsa05418	Fluid shear stress and atherosclerosis	142/9396	0.00609257725944503	0.0268454185494297	0.0154318568742522	RAC1/HMOX1/CTNNB1	3
hsa05226	Gastric cancer	150/9396	0.00708972589419352	0.0302924651842814	0.0174133618453876	EGFR/CCND1/CTNNB1	3
hsa04921	Oxytocin signaling pathway	155/9396	0.00775957724203685	0.0312600111750627	0.0179695472973485	EGFR/CAMKK2/CCND1	3
hsa04934	Cushing syndrome	155/9396	0.00775957724203685	0.0312600111750627	0.0179695472973485	EGFR/CCND1/CTNNB1	3
hsa05160	Hepatitis C	159/9396	0.00832169701641938	0.0325933133143092	0.0187359845106518	EGFR/CCND1/CTNNB1	3
hsa00600	Sphingolipid metabolism	55/9396	0.00925893145273653	0.0352840360766446	0.0202827232392806	SGPL1/GLA	2
hsa04310	Wnt signaling pathway	174/9396	0.0106414582786678	0.0385873138899195	0.0221815839456798	RAC1/CCND1/CTNNB1	3
hsa05165	Human papillomavirus infection	333/9396	0.0108729642328166	0.0385873138899195	0.0221815839456798	EGFR/PTEN/CCND1/CTNNB1	4
hsa04370	VEGF signaling pathway	60/9396	0.0109467557134524	0.0385873138899195	0.0221815839456798	RAC1/HSPB1	2
hsa05167	Kaposi sarcoma-associated herpesvirus infection	196/9396	0.0146653575077069	0.0462763549844384	0.0266015627756757	RAC1/CCND1/CTNNB1	3
hsa04920	Adipocytokine signaling pathway	70/9396	0.0146957525884443	0.0462763549844384	0.0266015627756757	CAMKK2/APPL1	2
hsa05416	Viral myocarditis	70/9396	0.0146957525884443	0.0462763549844384	0.0266015627756757	RAC1/CCND1	2
hsa04917	Prolactin signaling pathway	71/9396	0.0150972505622991	0.0462763549844384	0.0266015627756757	FOXO3/CCND1	2
hsa05120	Epithelial cell signaling in Helicobacter pylori infection	71/9396	0.0150972505622991	0.0462763549844384	0.0266015627756757	RAC1/EGFR	2
hsa05230	Central carbon metabolism in cancer	71/9396	0.0150972505622991	0.0462763549844384	0.0266015627756757	EGFR/PTEN	2
hsa04115	p53 signaling pathway	75/9396	0.0167502965085552	0.0502508895256656	0.0288862896116182	PTEN/CCND1	2
hsa05100	Bacterial invasion of epithelial cells	78/9396	0.0180387680686386	0.0519928148517273	0.0298876203328331	RAC1/CTNNB1	2
hsa04015	Rap1 signaling pathway	212/9396	0.0180684250193946	0.0519928148517273	0.0298876203328331	RAC1/EGFR/CTNNB1	3
hsa05166	Human T-cell leukemia virus 1 infection	224/9396	0.0208884775042391	0.0589055065619543	0.0338613214279245	PTEN/SLC25A5/CCND1	3
hsa05235	PD-L1 expression and PD-1 checkpoint pathway in cancer	90/9396	0.0235955880671728	0.0652348611268894	0.0374996962058267	EGFR/PTEN	2
hsa05222	Small cell lung cancer	93/9396	0.0250821880001539	0.0680113174619557	0.0390957181378917	PTEN/CCND1	2
hsa04657	IL-17 signaling pathway	95/9396	0.0260942101052533	0.0694204457517116	0.03990574335858	S100A8/S100A9	2
hsa05132	Salmonella infection	251/9396	0.0280802403261189	0.0709222204631858	0.0407690255742091	RAC1/RIPK2/CTNNB1	3
hsa01522	Endocrine resistance	99/9396	0.0281676903967263	0.0709222204631858	0.0407690255742091	EGFR/CCND1	2
hsa05231	Choline metabolism in cancer	99/9396	0.0281676903967263	0.0709222204631858	0.0407690255742091	RAC1/EGFR	2
hsa04933	AGE-RAGE signaling pathway in diabetic complications	101/9396	0.0292287715332443	0.0723027506348675	0.041562611413847	RAC1/CCND1	2
hsa04066	HIF-1 signaling pathway	110/9396	0.0341987088054715	0.0831382403719221	0.047791299056648	EGFR/HMOX1	2
hsa05022	Pathways of neurodegeneration - multiple diseases	483/9396	0.0369839714946759	0.0883854234025305	0.0508075968793942	RAC1/SLC25A5/CTNNB1/TRAP1	4
hsa04670	Leukocyte transendothelial migration	116/9396	0.0376835384407619	0.0885563153357904	0.0509058326305029	RAC1/CTNNB1	2
hsa04919	Thyroid hormone signaling pathway	122/9396	0.0412999887827441	0.0949815262946475	0.0545993096281288	CCND1/CTNNB1	2
hsa00603	Glycosphingolipid biosynthesis - globo and isoglobo series	16/9396	0.0417649264558024	0.0949815262946475	0.0545993096281288	GLA	1
hsa04010	MAPK signaling pathway	300/9396	0.0441191954839058	0.0987429613211225	0.0567615380494694	RAC1/EGFR/HSPB1	3
hsa04142	Lysosome	133/9396	0.0482565119558297	0.106315127902687	0.0611143325756396	GLA/CTSD	2
