# Supplementary material for: Identification of biomarkers associated with endoplasmic reticulum stress-related cell death in osteoporosis based on bulk and single-cell transcriptomic analyses and experimental validation
Source: Research Square preprint supplement (doi:10.21203/rs.3.rs-8454279/v1), 2026-01-12
Supplement: Supplementary file 2 [file 0fca573eabe63079e16c1e35.xlsx]

## Sheet: PCD
Supplementary Table 2
gene
AATF
ABL1
ACAA2
ACKR3
ACVR1
ACVR1B
ADORA1
AEN
AGT
AGTR2
AIFM1
AKT1
ANXA6
APAF1
APPL1
AR
ARHGEF2
ARL6IP5
ARMC10
ARRB2
ASAH2
ATF3
ATF4
ATM
ATP2A1
ATP2A3
ATP5IF1
AVP
BAD
BAG3
BAG5
BAG6
BAK1
BAX
BBC3
BCAP31
BCL10
BCL2
BCL2A1
BCL2L1
BCL2L10
BCL2L11
BCL2L12
BCL2L14
BCL2L2
BCL3
BCLAF1
BDKRB2
BDNF
BECN1
BID
BIK
BIRC6
BLOC1S2
BMF
BMP4
BMP5
BMPR1B
BNIP3
BNIP3L
BOK
BRCA1
BRCA2
BRSK2
BTK
CAAP1
CASP1
CASP10
CASP12
CASP2
CASP3
CASP4
CASP5
CASP8
CASP8AP2
CASP9
CAV1
CCAR2
CCK
CD14
CD24
CD27
CD28
CD38
CD3E
CD44
CD5
CD70
CD74
CDIP1
CDKN1A
CDKN2D
CEBPB
CFLAR
CHAC1
CHCHD10
CHEK2
CIB1
CIDEB
CLU
COA8
COL2A1
CRADD
CREB3
CREB3L1
CRH
CRIP1
CSF2
CSNK2A1
CSNK2A2
CTH
CTNNA1
CTSC
CTTN
CUL1
CUL2
CUL3
CUL4A
CUL5
CX3CL1
CX3CR1
CXCL12
CYLD
CYP1B1
DAB2IP
DAP
DAP3
DAPK1
DAPK2
DAPK3
DAPL1
DAXX
DBH
DCC
DDIAS
DDIT3
DDIT4
DDX3X
DDX47
DDX5
DEDD
DEDD2
DELE1
DEPTOR
DIABLO
DIDO1
DNAJA1
DNAJC10
DNM1L
DPF2
DYRK2
E2F1
E2F2
EDA2R
EIF2AK3
ELL3
ENO1
EP300
EPHA2
EPO
ERBB3
ERCC6
ERN1
ERN2
ERO1A
ERP29
EYA1
EYA2
EYA3
EYA4
FADD
FAF1
FAIM
FAIM2
FAM162A
FAS
FASLG
FASTK
FBH1
FBXW7
FEM1B
FGA
FGB
FGF10
FGFR1
FGFR3
FGG
FHIT
FIGNL1
FIS1
FNIP2
FXN
FYN
FZD9
G0S2
GABARAP
GATA1
GATA4
GCLM
GDNF
GFRAL
GGCT
GHITM
GNAI2
GNAI3
GPER1
GPX1
GRINA
GSDME
GSK3A
GSK3B
GSKIP
GSTP1
GZMB
HDAC1
HERPUD1
HGF
HIC1
HIF1A
HINT1
HIP1
HIP1R
HIPK1
HIPK2
HMGB2
HMOX1
HNRNPK
HRAS
HRK
HSPA1A
HSPA1B
HSPB1
HTRA2
HTT
HYAL2
HYOU1
ICAM1
IFI16
IFI27
IFI27L1
IFI27L2
IFI6
IFNB1
IFNG
IGF1
IKBKE
IL12A
IL19
IL1A
IL1B
IL2
IL20RA
IL33
IL4
IL6R
IL7
INCA1
ING2
ING5
INHBA
INHBB
INS
ITGA6
ITGAM
ITGAV
ITM2C
ITPR1
ITPRIP
IVNS1ABP
JAK2
JMY
JUN
KDM1A
KITLG
KRT18
KRT8
LCK
LGALS12
LGALS3
LRRK2
LTBR
LY96
MADD
MAEL
MAGEA3
MAP2K5
MAP3K5
MAPK7
MAPK8
MAPK8IP1
MAPK8IP2
MAPK9
MARCHF7
MAZ
MCL1
MDM2
MELK
MFF
MIF
MIR132
MIR15A
MIR16-1
MIR17
MIR198
MIR21
MIR210
MIR221
MIR222
MIR26B
MIR27B
MIR449A
MKNK2
MLH1
MLLT11
MMP9
MNT
MOAP1
MPV17L
MSH2
MSH6
MSX1
MUC1
MUL1
MYBBP1A
NACC2
NANOS3
NBN
NCK1
NCK2
NDUFA13
NDUFS3
NFATC4
NFE2L2
NGF
NGFR
NKX3-1
NLE1
NME5
NMT1
NOC2L
NOG
NOL3
NONO
NOS3
NOX1
NR4A2
NUPR1
OPA1
P2RX4
P2RX7
P4HB
PAK2
PAK5
PARK7
PARP1
PARP2
PAWR
PCGF2
PDCD10
PDCD5
PDCD6
PDIA3
PDK1
PDK2
PDPK1
PDX1
PEA15
PELI3
PERP
PF4
PHIP
PHLDA3
PIAS4
PIDD1
PIH1D1
PIK3R1
PINK1
PLAGL2
PLAUR
PLEKHF1
PLSCR3
PMAIP1
PML
POLB
POU4F1
POU4F2
PPARD
PPIA
PPIF
PPM1F
PPP1CA
PPP1R13B
PPP1R15A
PPP2R1B
PPP3CC
PPP3R1
PRDX2
PRELID1
PRKCA
PRKCD
PRKDC
PRKN
PRKRA
PRODH
PSEN1
PSMD10
PSME3
PTEN
PTGIS
PTH
PTPMT1
PTPN1
PTPN2
PTPRC
PTTG1IP
PYCARD
QARS1
RACK1
RAF1
RB1
RB1CC1
RBCK1
RELA
RET
RFFL
RHOT1
RHOT2
RIPK1
RIPK3
RNF183
RNF186
RNF34
RNF41
RPL11
RPL26
RPS27L
RPS3
RPS6KB1
RPS7
RRP8
RTKN2
RTL10
S100A8
S100A9
SCG2
SCN2A
SCRT2
SELENOK
SELENOS
SENP1
SEPTIN4
SERINC3
SERPINE1
SFN
SFPQ
SFRP1
SFRP2
SGMS1
SGPL1
SGPP1
SH3RF1
SHH
SHISA5
SIAH1
SIAH2
SIRT1
SIVA1
SKIL
SLC25A5
SLC35F6
SLC9A3R1
SMAD3
SNAI1
SNAI2
SNW1
SOD1
SOD2
SORT1
SP100
SRC
SRPX
SST
SSTR3
ST20
STK11
STK24
STK25
STK3
STK4
STRADB
STX4
STYXL1
SYVN1
TAF9
TAF9B
TCF7L2
TERT
TFDP1
TFDP2
TFPT
TGFB1
TGFB2
TGFBR1
THBS1
TICAM1
TICAM2
TIMM50
TIMP3
TLR3
TLR4
TM2D1
TMBIM1
TMBIM6
TMC8
TMEM102
TMEM109
TMEM117
TMEM14A
TMEM161A
TNF
TNFAIP3
TNFRSF10A
TNFRSF10B
TNFRSF10C
TNFRSF12A
TNFRSF1A
TNFRSF1B
TNFRSF25
TNFSF10
TNFSF12
TOPORS
TP53
TP53BP2
TP63
TP73
TPD52L1
TPT1
TRADD
TRAF1
TRAF2
TRAF7
TRAP1
TRIAP1
TRIB3
TRIM32
TRIM39
TXNDC12
TYROBP
UACA
UBB
UBE2K
UBE4B
UBQLN1
UMOD
UNC5B
URI1
USP28
USP47
VDAC2
VNN1
WDR35
WNT4
WWOX
XBP1
YAP1
YBX3
YWHAB
YWHAE
YWHAG
YWHAH
YWHAQ
YWHAZ
ZC3HC1
ZDHHC3
ZMYND11
ZNF205
ZNF385A
ZNF385B
ZNF622
ZSWIM2
CASP6
CHMP2A
CHMP2B
CHMP3
CHMP4A
CHMP4B
CHMP4C
CHMP6
CHMP7
CYCS
ELANE
GPX4
GSDMB
GSDMC
GSDMD
HMGB1
IL18
IRF1
IRF2
NLRC4
NLRP1
NLRP2
NLRP3
NLRP6
NLRP7
NOD1
PLCG1
PJVK
PRKACA
SCAF11
TINAP
AIM2
GSDMA
IL6
NOD2
TIRAP
ABCC1
ACACA
ACO1
ACSF2
ACSL1
ACSL3
ACSL4
ACSL5
ACSL6
AIFM2
AKR1C1
AKR1C2
AKR1C3
ALOX12
ALOX15
ALOX5
ATG5
ATG7
ATP5MC3
BACH1
CARS
CBS
CISD1
CP
CRYAB
CS
CYBB
DPP4
EMC2
FADS2
FANCD2
FDFT1
FTH1
FTL
FTMT
G6PD
GCLC
GLS2
GOT1
GSS
HMGCR
HSBP1
IREB2
KEAP1
LPCAT3
MAP1LC3A
MAP1LC3B
MAP1LC3C
MT1G
NCOA4
NFS1
NQO1
NRF2
OTUB1
PCBP1
PCBP2
PEBP1
PGD
PHKG2
PRNP
PROM2
PTGS2
RPL8
SAT1
SAT2
SLC11A2
SLC1A5
SLC39A14
SLC39A8
SLC3A2
SLC40A1
SLC7A11
SQLE
STEAP3
TF
TFRC
VDAC3
ZEB1
ABL2
ACER2
ADRA1A
ADRB2
AMBRA1
ATF6
ATG101
ATG13
ATG14
ATG2A
ATG2B
ATP13A2
ATP6V0A1
ATP6V0A2
ATP6V0B
ATP6V0C
ATP6V0D1
ATP6V0D2
ATP6V0E1
ATP6V0E2
ATP6V1A
ATP6V1B1
ATP6V1B2
ATP6V1C1
ATP6V1C2
ATP6V1D
ATP6V1E1
ATP6V1E2
ATP6V1G1
ATP6V1G2
ATP6V1H
AUP1
C9orf72
CALCOCO2
CAMKK2
CAPN1
CAPNS1
CDC37
CDK5
CDK5R1
CISD2
CLEC16A
CLN3
CPTP
CTSA
DCN
DDRGK1
DEPDC5
DEPP1
DHRSX
DRAM1
DRAM2
EEF1A1
EEF1A2
EIF2AK4
EIF4G1
EIF4G2
ELAPOR1
EPM2A
ERCC4
EXOC1
EXOC4
EXOC7
EXOC8
FBXL2
FBXO7
FEZ1
FEZ2
FLCN
FOXK1
FOXK2
FOXO1
FOXO3
FYCO1
FZD5
GAPDH
GBA
GFAP
GOLGA2
GPR137
GPR137B
GPSM1
HAX1
HDAC6
HERC1
HSP90AA1
HSPA8
HSPB8
HTR2B
HUWE1
IKBKG
IL10
IL10RA
IRGM
KAT5
KAT8
KDM4A
KDR
KIF25
KLHL22
KLHL3
LACRT
LAMP1
LAMP2
LAMP3
LAMTOR1
LAMTOR2
LAMTOR3
LAMTOR4
LAMTOR5
LARP1
LEP
LEPR
LGALS8
LRSAM1
LZTS1
MAP3K7
MAPK15
MAPK3
MAPT
MEFV
MET
MFN2
MFSD8
MID2
MIR199A1
MIRLET7B
MLST8
MT3
MTCL1
MTDH
MTM1
MTMR3
MTMR4
MTMR8
MTMR9
MTOR
NEDD4
NPC1
NPRL2
NRBP2
OPTN
ORMDL3
OSBPL7
PAFAH1B2
PHB2
PHF23
PIK3C2A
PIK3C3
PIK3CA
PIK3CB
PIK3R2
PIM2
PIP4K2A
PIP4K2B
PIP4K2C
PLK2
PLK3
POLDIP2
PRKAA1
PRKAA2
PRKAB1
PRKAB2
PRKAG1
PRKAG2
PRKAG3
PRKD1
PSAP
PTPN22
QSOX1
RAB39B
RAB3GAP1
RAB3GAP2
RAB7A
RAB8A
RALB
RASIP1
RETREG1
RETREG3
RHEB
RIPK2
RMC1
RNF152
RNF5
ROCK1
RPTOR
RRAGA
RRAGB
RRAGC
RRAGD
RUBCN
RUFY4
SCFD1
SCOC
SEC22B
SESN1
SESN2
SESN3
SH3BP4
SH3GLB1
SIRT2
SLC38A9
SMCR8
SMG1
SNCA
SNRNP70
SNX32
SNX5
SNX6
SOGA1
SOGA3
SPTLC1
SPTLC2
SQSTM1
SREBF1
SREBF2
STAT3
STBD1
STING1
STUB1
SUPT5H
SVIP
SYNPO2
TAB2
TAB3
TBC1D14
TBC1D25
TBK1
TEX264
TFEB
TIGAR
TLK2
TMEM150A
TMEM150B
TMEM150C
TMEM39A
TMEM39B
TMEM59
TOMM7
TP53INP1
TP53INP2
TPCN1
TPCN2
TREM2
TRIM13
TRIM14
TRIM21
TRIM22
TRIM27
TRIM34
TRIM38
TRIM5
TRIM6
TRIM65
TRIM68
TRIM8
TRIML1
TRIML2
TSC1
TSC2
TSPO
UBA5
UBQLN2
UBQLN4
UCHL1
UFC1
UFL1
UFM1
ULK1
USP10
USP13
USP30
USP33
USP36
UVRAG
VDAC1
VPS13C
VPS13D
VPS26A
VPS26B
VPS35
WAC
WASHC1
WDFY3
WDR24
WDR41
WDR6
WDR81
WIPI2
ZC3H12A
ZKSCAN3
ZMPSTE24
GLUD1
GLUD2
PYG
GLNA
CAPN2
HSP90A
TNFSF6
TNFRSF6
JNK
CAMK2
IRF9
XIAP
TRPM7
IFNAR1
IFNAR2
IFNGR1
IFNGR2
TIRP
IFNA
IFNB
TRIF
SLC25A4S
PPID
MLKL
TRAF5
JAK1
JAK3
TYK2
STAT1
STAT2
STAT4
STAT5A
STAT5B
STAT6
H2A
RNF31
VPS24
VPS4
CHMP1
CHMP5
SMPD1
ZBP1
PGAM5
BIRC2
BIRC3
EIF2AK2
PLA2G4
SPATA2
SHARPIN
NOX2
USP21
ATP7B
ATP7A
SLC31A1
FDX1
LIAS
LIPT1
LIPT2
DLD
DLAT
PDHA1
PDHB
MTF1
GLS
CDKN2A
DBT
GCSH
DLST
PARP
HSP70
PAAN
ARH3
RNF146
ADPRHL2
OGG1
AMPK
CDC42
CDH1
MYH14
PI3KC3
RHOA
ROCK
MMP1
MPO
CAMP
PADI4
EIPA
NCX1
MIA
ABCA2
ABCB9
ACP2
ACP5
ADGRE2
AGA
AP1B1
AP1G1
AP1M1
AP1M2
AP1S1
AP1S2
AP1S3
AP3B1
AP3B2
AP3D1
AP3M1
AP3M2
AP3S1
AP3S2
AP4B1
AP4E1
AP4M1
AP4S1
ARF1
ARL8B
ARSA
ARSB
ARSG
ASAH1
ATP10B
ATP6AP1
ATP6V0A4
BLK
BLOC1S1
BORCS5
BORCS6
C12orf4
CBL
CD164
CD300A
CD63
CD68
CD84
CHGA
CLN5
CLNK
CLTA
CLTB
CLTC
CLTCL1
CPLX2
CTNS
CTSB
CTSD
CTSE
CTSF
CTSG
CTSH
CTSK
CTSL
CTSO
CTSS
CTSV
CTSW
CTSZ
DEF8
DNASE2
DNASE2B
ENTPD4
FAM98A
FER
FES
FGR
FOXF1
FUCA1
GAA
GAB2
GALC
GALNS
GATA2
GCC2
GGA1
GGA2
GGA3
GLA
GLB1
GM2A
GNPTAB
GNPTG
GNS
GUSB
HEXA
HEXB
HGS
HGSNAT
HPS6
HYAL1
IDS
IDUA
IGF2R
IL13
IL13RA2
IL4R
KIF1B
KIT
KXD1
LAPTM4A
LAPTM4B
LAPTM5
LAT
LAT2
LGALS9
LGMN
LIPA
LYN
M6PR
MAN2B1
MANBA
MAP6
MCOLN1
MILR1
MRGPRX2
MYH9
NAGA
NAGLU
NAGPA
NAPSA
NDEL1
NEU1
NPC2
NR4A3
PIK3CD
PIK3CG
PIP4P1
PLA2G15
PLA2G3
PLEKHM1
PLEKHM2
PPT1
PPT2
PSAPL1
PTGDR
PTGDS
RAB34
RAB3A
RAC2
RUBCNL
S100A13
SCARB2
SGSH
SLC11A1
SLC17A5
SNAP23
SNAPIN
SNX16
SNX4
SORL1
SPAG9
SPHK2
STXBP1
STXBP2
SUMF1
SYK
SYTL4
TCIRG1
TMEM106B
TPP1
UNC13D
VAMP7
VAMP8
VPS33A
VPS33B
VPS4A
WASH3P
ZFYVE16
IKBKB
NFKB1
CA9
CHUK
NFKB1A
AIRE
MYD88
TLR2
PAD4
PKCB
PRKCZ
NOX3
NOX4
PRTN3
IL1B
CXCL1
PLA2G7
CXCL8
CDK6
AGER
CSF3
CALR
CD4
CD8A
CD8B
CXCR3
ENTPD1
FOXP3
IFNA1
IL17A
IL17RA
IL1R1
NT5E
PRF1
BRMS1
PTK2
NTRK2
CEACAM6
ITGB1
CEACAM5
EGFR
SIK1
PTRH2
TLE1
CTNNB1
ZNF304
MAPK1
ITGA5
PAK1
FN1
BCAR1
ERBB2
ANGPTL4
PDK4
BRAF
ANKRD13C
ITGA2
ANXA5
BIRC5
TIMP1
CSPG4
BSG
AKT2
IGF1R
ILK
TLE5
ITGA3
PTK2B
CCND1
CDCP1
SKP2
EGF
ITGB4
PIK3R3
MAP2K1
FBXW7-AS1
ABHD4
ITGA4
PHLDA2
HMCN1
MMP2
CEMIP
CDKN3
MIR200C
CPT1A
CLDN1
MIR204
MIR26A1
CDKN1B
KLF12
NTRK1
PLAU
MYC
SMAD4
PLK1
LGALS1
ITGB3
KRAS
CDK11B
CDK11A
PPARG
MIR145
CCR7
MSLN
RAC1
GRHL2
NOTCH1
RHOG
MMP13
MTA1
MYO5A
CCN6
MAPK11
PTHLH
PDGFB
GLI2
EZH2
CXCR4
HMGA1
SIK2
ANGPTL2
S100A4
NTF3
ETV4
MIR124-1
HTRA1
LATS1
CEACAM3
LAMC2
LAMA3
LAMB3
CDH2
EDIL3
ZEB2
TLN1
SIRT3
OLFM3
SPINK1
CPEB2
NAT1
TSG101
MIR200A
MIR6744
SERPINA1
AKT3
AFP
ITGA8
PBK
SATB1
LTB4R2
MAVS
HRC
CCN2
RHOB
PLG
PRKCQ
SP1
HAVCR2
DOCK1
VTN
PDCD4
PRPF4B
RANBP9
ZBTB7A
MIR141
KL
PRKCI
EPHB6
FGF2
HK2
LTF
IQGAP1
MGAT5
SDCBP
ABHD2
SPIB
TRIM31
MIR1827
PDGFRB
PLAT
NRAS
PAK4
VEGFA
PIN1
IL1RAP
UBE2C
TWIST1
BMP6
ELK1
KDM3A
PRDX4
LMO3
ZNF32
MIR200B
MIR525
MIR363
TUBB3
HSP90B1
SLC2A1
PTPN11
PAK3
CD36
PPP2CA
CDH3
EEF2K
LRP1
PTK6
LPAR1
CEACAM1
GDF2
GLO1
RBL2
SIRPA
ADCY10
VPS37A
APOBEC3G
BAG1
COL13A1
MNX1
RAD9A
MEGF11
BCL2L15
NOTCH3
FASN
TPM1
PPP2R1A
COL4A2
CTNND1
CD151
MMP11
ARHGEF7
PPP2R2A
SEMA7A
PPP2R5A
BST2
CCN1
PPP2R2D
CCDC178
MIR10A
MIR30B
MIR30C1
SHC1
CAMK2B
PRKACG
MARK4
SSTR5
TAAR5
HACD2
NT5C
INSRR
TAAR9
PLPP2
G6PC2
GUCY2EP
CDK4
RGR
ADGRG1
UQCRC1
TNK2
RNF181
UBE2U
MYLK
CTDSP2
GPR15
ATP23
PI4KB
DSTYK
CFD
PPP3CA
CCR4
PRAG1
GPR153
MAP2K2
MAPK14
PDCD6IP
EIF2S1
HSPA5
CASP7
ITPR3
RYR1
RYR2
MCU
TNFRSF19
CSF1
PHB
ARF6
GIT1
PFKFB3
PCK2
MTUS2
AURKA
KIF2C
EZR
MRTFA
DIAPH1
LPAR2
PIKFYVE
