# Supplementary material for: Identification of biomarkers associated with endoplasmic reticulum stress-related cell death in osteoporosis based on bulk and single-cell transcriptomic analyses and experimental validation
Source: Research Square preprint supplement (doi:10.21203/rs.3.rs-8454279/v1), 2026-01-12
Supplement: Supplementary file 3 [file 103923ad8754e96479ad8de8.xlsx]

## Sheet: GeneCards-SearchResults
Supplementary Table 1
Gene Symbol	Description	Category	Uniprot ID	Gifts	GC Id	Relevance score	GeneCards Link
XBP1	X-Box Binding Protein 1	Protein Coding	P17861	59	GC22M028794	30.5261001586914	https://www.genecards.org/cgi-bin/carddisp.pl?gene=XBP1
ATF6	Activating Transcription Factor 6	Protein Coding	P18850	61	GC01P161766	24.0218906402588	https://www.genecards.org/cgi-bin/carddisp.pl?gene=ATF6
ERN1	Endoplasmic Reticulum To Nucleus Signaling 1	Protein Coding	O75460	60	GC17M064039	22.4114589691162	https://www.genecards.org/cgi-bin/carddisp.pl?gene=ERN1
EIF2AK3	Eukaryotic Translation Initiation Factor 2 Alpha Kinase 3	Protein Coding	Q9NZJ5	63	GC02M088556	21.2544822692871	https://www.genecards.org/cgi-bin/carddisp.pl?gene=EIF2AK3
DDIT3	DNA Damage Inducible Transcript 3	Protein Coding	P35638	59	GC12M057516	18.9611873626709	https://www.genecards.org/cgi-bin/carddisp.pl?gene=DDIT3
ATF4	Activating Transcription Factor 4	Protein Coding	P18848	60	GC22P039519	18.1661796569824	https://www.genecards.org/cgi-bin/carddisp.pl?gene=ATF4
HSPA5	Heat Shock Protein Family A (Hsp70) Member 5	Protein Coding	P11021	62	GC09M125234	17.6142253875732	https://www.genecards.org/cgi-bin/carddisp.pl?gene=HSPA5
MANF	Mesencephalic Astrocyte Derived Neurotrophic Factor	Protein Coding	P55145	54	GC03P051385	12.0407209396362	https://www.genecards.org/cgi-bin/carddisp.pl?gene=MANF
ATF6B	Activating Transcription Factor 6 Beta	Protein Coding	Q99941	50	GC06M032115	11.0622472763062	https://www.genecards.org/cgi-bin/carddisp.pl?gene=ATF6B
MBTPS2	Membrane Bound Transcription Factor Peptidase, Site 2	Protein Coding	O43462	52	GC0XP021839	10.9235095977783	https://www.genecards.org/cgi-bin/carddisp.pl?gene=MBTPS2
SYVN1	Synoviolin 1	Protein Coding	Q86TM6	53	GC11M142963	10.0682249069214	https://www.genecards.org/cgi-bin/carddisp.pl?gene=SYVN1
EIF2S1	Eukaryotic Translation Initiation Factor 2 Subunit Alpha	Protein Coding	P05198	58	GC14P067359	9.87462615966797	https://www.genecards.org/cgi-bin/carddisp.pl?gene=EIF2S1
CREB3L2	CAMP Responsive Element Binding Protein 3 Like 2	Protein Coding	Q70SY1	51	GC07M137874	9.80702877044678	https://www.genecards.org/cgi-bin/carddisp.pl?gene=CREB3L2
CREB3L1	CAMP Responsive Element Binding Protein 3 Like 1	Protein Coding	Q96BA8	52	GC11P049458	9.21487903594971	https://www.genecards.org/cgi-bin/carddisp.pl?gene=CREB3L1
MAPK8	Mitogen-Activated Protein Kinase 8	Protein Coding	P45983	63	GC10P048306	9.01013851165771	https://www.genecards.org/cgi-bin/carddisp.pl?gene=MAPK8
HERPUD1	Homocysteine Inducible ER Protein With Ubiquitin Like Domain 1	Protein Coding	Q15011	47	GC16P056932	8.10509300231934	https://www.genecards.org/cgi-bin/carddisp.pl?gene=HERPUD1
SELENOK	Selenoprotein K	Protein Coding	Q9Y6D0	41	GC03M053884	8.03568363189697	https://www.genecards.org/cgi-bin/carddisp.pl?gene=SELENOK
CASP3	Caspase 3	Protein Coding	P42574	62	GC04M184627	7.63942909240723	https://www.genecards.org/cgi-bin/carddisp.pl?gene=CASP3
CEBPB	CCAAT Enhancer Binding Protein Beta	Protein Coding	P17676	58	GC20P050190	7.59681558609009	https://www.genecards.org/cgi-bin/carddisp.pl?gene=CEBPB
CASP4	Caspase 4	Protein Coding	P49662	60	GC11M104942	7.44125556945801	https://www.genecards.org/cgi-bin/carddisp.pl?gene=CASP4
WFS1	Wolframin ER Transmembrane Glycoprotein	Protein Coding	O76024	58	GC04P006269	7.10311079025269	https://www.genecards.org/cgi-bin/carddisp.pl?gene=WFS1
MBTPS1	Membrane Bound Transcription Factor Peptidase, Site 1	Protein Coding	Q14703	55	GC16M084053	7.01541900634766	https://www.genecards.org/cgi-bin/carddisp.pl?gene=MBTPS1
CLU	Clusterin	Protein Coding	P10909	60	GC08M027596	6.98425006866455	https://www.genecards.org/cgi-bin/carddisp.pl?gene=CLU
DNAJC3	DnaJ Heat Shock Protein Family (Hsp40) Member C3	Protein Coding	Q13217	52	GC13P095677	6.51059913635254	https://www.genecards.org/cgi-bin/carddisp.pl?gene=DNAJC3
SOD2-OT1	SOD2 Overlapping Transcript 1	RNA Gene		20	GC06M159772	6.39753770828247	https://www.genecards.org/cgi-bin/carddisp.pl?gene=SOD2-OT1
TRAF2	TNF Receptor Associated Factor 2	Protein Coding	Q12933	59	GC09P136881	6.37499284744263	https://www.genecards.org/cgi-bin/carddisp.pl?gene=TRAF2
ERN2	Endoplasmic Reticulum To Nucleus Signaling 2	Protein Coding	Q76MJ5	47	GC16M023690	6.29212331771851	https://www.genecards.org/cgi-bin/carddisp.pl?gene=ERN2
SIL1	SIL1 Nucleotide Exchange Factor	Protein Coding	Q9H173	53	GC05M139019	6.23739528656006	https://www.genecards.org/cgi-bin/carddisp.pl?gene=SIL1
GSK3B	Glycogen Synthase Kinase 3 Beta	Protein Coding	P49841	64	GC03M119821	6.18651342391968	https://www.genecards.org/cgi-bin/carddisp.pl?gene=GSK3B
HSP90B1	Heat Shock Protein 90 Beta Family Member 1	Protein Coding	P14625	60	GC12P103930	6.16251611709595	https://www.genecards.org/cgi-bin/carddisp.pl?gene=HSP90B1
CREB3	CAMP Responsive Element Binding Protein 3	Protein Coding	O43889	47	GC09P078071	6.14508438110352	https://www.genecards.org/cgi-bin/carddisp.pl?gene=CREB3
QRICH1	Glutamine Rich 1	Protein Coding	Q2TAL8	47	GC03M055012	6.12892818450928	https://www.genecards.org/cgi-bin/carddisp.pl?gene=QRICH1
EIF2AK2	Eukaryotic Translation Initiation Factor 2 Alpha Kinase 2	Protein Coding	P19525	62	GC02M037099	6.12222385406494	https://www.genecards.org/cgi-bin/carddisp.pl?gene=EIF2AK2
BCL2	BCL2 Apoptosis Regulator	Protein Coding	P10415	64	GC18M063123	6.10415029525757	https://www.genecards.org/cgi-bin/carddisp.pl?gene=BCL2
MIR7-3HG	MIR7-3 Host Gene	RNA Gene	Q8N6C7	33	GC19P161104	6.06448745727539	https://www.genecards.org/cgi-bin/carddisp.pl?gene=MIR7-3HG
BBC3	BCL2 Binding Component 3	Protein Coding	Q96PG8	53	GC19M047220	6.04954099655151	https://www.genecards.org/cgi-bin/carddisp.pl?gene=BBC3
PPP1R15A	Protein Phosphatase 1 Regulatory Subunit 15A	Protein Coding	O75807	53	GC19P048872	5.87604379653931	https://www.genecards.org/cgi-bin/carddisp.pl?gene=PPP1R15A
CCDC88B	Coiled-Coil Domain Containing 88B	Protein Coding	A6NC98	37	GC11P064340	5.8023476600647	https://www.genecards.org/cgi-bin/carddisp.pl?gene=CCDC88B
GORASP2	Golgi Reassembly Stacking Protein 2	Protein Coding	Q9H8Y8	48	GC02P170928	5.74760866165161	https://www.genecards.org/cgi-bin/carddisp.pl?gene=GORASP2
CERNA3	Competing Endogenous LncRNA 3 For MiR-645	RNA Gene		20	GC08P056502	5.74411487579346	https://www.genecards.org/cgi-bin/carddisp.pl?gene=CERNA3
TNFRSF10B	TNF Receptor Superfamily Member 10b	Protein Coding	O14763	62	GC08M023006	5.60226964950562	https://www.genecards.org/cgi-bin/carddisp.pl?gene=TNFRSF10B
TRIM13	Tripartite Motif Containing 13	Protein Coding	O60858	46	GC13P049995	5.58953523635864	https://www.genecards.org/cgi-bin/carddisp.pl?gene=TRIM13
VCP	Valosin Containing Protein	Protein Coding	P55072	62	GC09M035946	5.58523750305176	https://www.genecards.org/cgi-bin/carddisp.pl?gene=VCP
CASP9	Caspase 9	Protein Coding	P55211	61	GC01M036228	5.58523750305176	https://www.genecards.org/cgi-bin/carddisp.pl?gene=CASP9
TMEM208	Transmembrane Protein 208	Protein Coding	Q9BTX3	39	GC16P129735	5.55504894256592	https://www.genecards.org/cgi-bin/carddisp.pl?gene=TMEM208
NFE2L2	NFE2 Like BZIP Transcription Factor 2	Protein Coding	Q16236	64	GC02M177227	5.46599960327148	https://www.genecards.org/cgi-bin/carddisp.pl?gene=NFE2L2
TRIB3	Tribbles Pseudokinase 3	Protein Coding	Q96RU7	53	GC20P000562	5.43897247314453	https://www.genecards.org/cgi-bin/carddisp.pl?gene=TRIB3
CALR	Calreticulin	Protein Coding	P27797	64	GC19P012938	5.25208902359009	https://www.genecards.org/cgi-bin/carddisp.pl?gene=CALR
DNAJC10	DnaJ Heat Shock Protein Family (Hsp40) Member C10	Protein Coding	Q8IXB1	48	GC02P182716	5.18000602722168	https://www.genecards.org/cgi-bin/carddisp.pl?gene=DNAJC10
BDNF-AS	BDNF Antisense RNA	RNA Gene		30	GC11P027466	5.13000392913818	https://www.genecards.org/cgi-bin/carddisp.pl?gene=BDNF-AS
RNF183	Ring Finger Protein 183	Protein Coding	Q96D59	41	GC09M113297	5.12157583236694	https://www.genecards.org/cgi-bin/carddisp.pl?gene=RNF183
PIK3R1	Phosphoinositide-3-Kinase Regulatory Subunit 1	Protein Coding	P27986	65	GC05P068215	5.07246589660645	https://www.genecards.org/cgi-bin/carddisp.pl?gene=PIK3R1
MAP3K5	Mitogen-Activated Protein Kinase Kinase Kinase 5	Protein Coding	Q99683	62	GC06M136557	5.00075578689575	https://www.genecards.org/cgi-bin/carddisp.pl?gene=MAP3K5
FAM20C	FAM20C Golgi Associated Secretory Pathway Kinase	Protein Coding	Q8IXL6	55	GC07P000192	4.99784469604492	https://www.genecards.org/cgi-bin/carddisp.pl?gene=FAM20C
JUN	Jun Proto-Oncogene, AP-1 Transcription Factor Subunit	Protein Coding	P05412	63	GC01M058780	4.98924732208252	https://www.genecards.org/cgi-bin/carddisp.pl?gene=JUN
SELENOS	Selenoprotein S	Protein Coding	Q9BQE4	47	GC15M166869	4.98069047927856	https://www.genecards.org/cgi-bin/carddisp.pl?gene=SELENOS
NFKB1	Nuclear Factor Kappa B Subunit 1	Protein Coding	P19838	66	GC04P102501	4.85569667816162	https://www.genecards.org/cgi-bin/carddisp.pl?gene=NFKB1
DERL2	Derlin 2	Protein Coding	Q9GZP9	49	GC17M005471	4.83284473419189	https://www.genecards.org/cgi-bin/carddisp.pl?gene=DERL2
CASP12	Caspase 12 (Gene/Pseudogene)	Protein Coding	Q6UXS9	41	GC11M143622	4.81672668457031	https://www.genecards.org/cgi-bin/carddisp.pl?gene=CASP12
UBQLN1	Ubiquilin 1	Protein Coding	Q9UMX0	54	GC09M083659	4.78611326217651	https://www.genecards.org/cgi-bin/carddisp.pl?gene=UBQLN1
BCL2L11	BCL2 Like 11	Protein Coding	O43521	58	GC02P111119	4.76274490356445	https://www.genecards.org/cgi-bin/carddisp.pl?gene=BCL2L11
CREB3L3	CAMP Responsive Element Binding Protein 3 Like 3	Protein Coding	Q68CJ9	50	GC19P004153	4.72587490081787	https://www.genecards.org/cgi-bin/carddisp.pl?gene=CREB3L3
CFTR	CF Transmembrane Conductance Regulator	Protein Coding	P13569	66	GC07P117287	4.70131015777588	https://www.genecards.org/cgi-bin/carddisp.pl?gene=CFTR
EIF2A	Eukaryotic Translation Initiation Factor 2A	Protein Coding	Q9BY44	48	GC03P150546	4.66973829269409	https://www.genecards.org/cgi-bin/carddisp.pl?gene=EIF2A
CEBPA	CCAAT Enhancer Binding Protein Alpha	Protein Coding	P49715	60	GC19M033299	4.58269643783569	https://www.genecards.org/cgi-bin/carddisp.pl?gene=CEBPA
PRKN	Parkin RBR E3 Ubiquitin Protein Ligase	Protein Coding	O60260	62	GC06M161348	4.57893085479736	https://www.genecards.org/cgi-bin/carddisp.pl?gene=PRKN
BFAR	Bifunctional Apoptosis Regulator	Protein Coding	Q9NZS9	44	GC16P128314	4.50546073913574	https://www.genecards.org/cgi-bin/carddisp.pl?gene=BFAR
BAX	BCL2 Associated X, Apoptosis Regulator	Protein Coding	Q07812	63	GC19P048954	4.49441146850586	https://www.genecards.org/cgi-bin/carddisp.pl?gene=BAX
SEL1L	SEL1L Adaptor Subunit Of SYVN1 Ubiquitin Ligase	Protein Coding	Q9UBV2	54	GC14M081471	4.49441146850586	https://www.genecards.org/cgi-bin/carddisp.pl?gene=SEL1L
CANX	Calnexin	Protein Coding	P27824	58	GC05P179678	4.40721225738525	https://www.genecards.org/cgi-bin/carddisp.pl?gene=CANX
BRSK2	BR Serine/Threonine Kinase 2	Protein Coding	Q8IWQ3	55	GC11P001389	4.33475351333618	https://www.genecards.org/cgi-bin/carddisp.pl?gene=BRSK2
THBS4	Thrombospondin 4	Protein Coding	P35443	55	GC05P079991	4.30746746063232	https://www.genecards.org/cgi-bin/carddisp.pl?gene=THBS4
TP53	Tumor Protein P53	Protein Coding	P04637	66	GC17M007661	4.26411628723145	https://www.genecards.org/cgi-bin/carddisp.pl?gene=TP53
SCARNA5	Small Cajal Body-Specific RNA 5	RNA Gene		27	GC02P233275	4.25495624542236	https://www.genecards.org/cgi-bin/carddisp.pl?gene=SCARNA5
TEX2	Testis Expressed 2	Protein Coding	Q8IWB9	44	GC17M064147	4.21716117858887	https://www.genecards.org/cgi-bin/carddisp.pl?gene=TEX2
BCAP31	B Cell Receptor Associated Protein 31	Protein Coding	P51572	53	GC0XM153701	4.21560668945313	https://www.genecards.org/cgi-bin/carddisp.pl?gene=BCAP31
RNF186	Ring Finger Protein 186	Protein Coding	Q9NXI6	40	GC01M019814	4.19600963592529	https://www.genecards.org/cgi-bin/carddisp.pl?gene=RNF186
ERO1A	Endoplasmic Reticulum Oxidoreductase 1 Alpha	Protein Coding	Q96HE7	50	GC14M052640	4.15897464752197	https://www.genecards.org/cgi-bin/carddisp.pl?gene=ERO1A
PPP1CB	Protein Phosphatase 1 Catalytic Subunit Beta	Protein Coding	P62140	59	GC02P030342	4.10595417022705	https://www.genecards.org/cgi-bin/carddisp.pl?gene=PPP1CB
PPP1CC	Protein Phosphatase 1 Catalytic Subunit Gamma	Protein Coding	P36873	57	GC12M110838	4.10595417022705	https://www.genecards.org/cgi-bin/carddisp.pl?gene=PPP1CC
RNF13	Ring Finger Protein 13	Protein Coding	O43567	52	GC03P149812	4.0077109336853	https://www.genecards.org/cgi-bin/carddisp.pl?gene=RNF13
HYOU1	Hypoxia Up-Regulated 1	Protein Coding	Q9Y4L1	57	GC11M143848	3.97320914268494	https://www.genecards.org/cgi-bin/carddisp.pl?gene=HYOU1
TMBIM6	Transmembrane BAX Inhibitor Motif Containing 6	Protein Coding	P55061	47	GC12P049707	3.96443367004395	https://www.genecards.org/cgi-bin/carddisp.pl?gene=TMBIM6
BCL2L1	BCL2 Like 1	Protein Coding	Q07817	63	GC20M031664	3.92590379714966	https://www.genecards.org/cgi-bin/carddisp.pl?gene=BCL2L1
CEBPD	CCAAT Enhancer Binding Protein Delta	Protein Coding	P49716	53	GC08M047767	3.9041953086853	https://www.genecards.org/cgi-bin/carddisp.pl?gene=CEBPD
SOD1	Superoxide Dismutase 1	Protein Coding	P00441	66	GC21P031659	3.88795280456543	https://www.genecards.org/cgi-bin/carddisp.pl?gene=SOD1
P4HB	Prolyl 4-Hydroxylase Subunit Beta	Protein Coding	P07237	62	GC17M081843	3.87751150131226	https://www.genecards.org/cgi-bin/carddisp.pl?gene=P4HB
TXNIP	Thioredoxin Interacting Protein	Protein Coding	Q9H3M7	53	GC01M145992	3.87295579910278	https://www.genecards.org/cgi-bin/carddisp.pl?gene=TXNIP
ATF3	Activating Transcription Factor 3	Protein Coding	P18847	57	GC01P212565	3.87214136123657	https://www.genecards.org/cgi-bin/carddisp.pl?gene=ATF3
SGF29	SAGA Complex Associated Factor 29	Protein Coding	Q96ES7	43	GC16P128740	3.85600543022156	https://www.genecards.org/cgi-bin/carddisp.pl?gene=SGF29
MIR211	MicroRNA 211	RNA Gene		30	GC15M031065	3.85344886779785	https://www.genecards.org/cgi-bin/carddisp.pl?gene=MIR211
UBL5	Ubiquitin Like 5	Protein Coding	Q9BZL1	47	GC19P009827	3.83383846282959	https://www.genecards.org/cgi-bin/carddisp.pl?gene=UBL5
CXCL8	C-X-C Motif Chemokine Ligand 8	Protein Coding	P10145	56	GC04P073740	3.82006645202637	https://www.genecards.org/cgi-bin/carddisp.pl?gene=CXCL8
EDEM1	ER Degradation Enhancing Alpha-Mannosidase Like Protein 1	Protein Coding	Q92611	53	GC03P005187	3.81145143508911	https://www.genecards.org/cgi-bin/carddisp.pl?gene=EDEM1
PPP1CA	Protein Phosphatase 1 Catalytic Subunit Alpha	Protein Coding	P62136	62	GC11M143067	3.77658462524414	https://www.genecards.org/cgi-bin/carddisp.pl?gene=PPP1CA
MAPK9	Mitogen-Activated Protein Kinase 9	Protein Coding	P45984	62	GC05M183695	3.73837566375732	https://www.genecards.org/cgi-bin/carddisp.pl?gene=MAPK9
TRAM1	Translocation Associated Membrane Protein 1	Protein Coding	Q15629	48	GC08M070573	3.72522759437561	https://www.genecards.org/cgi-bin/carddisp.pl?gene=TRAM1
DERL3	Derlin 3	Protein Coding	Q96Q80	43	GC22M023834	3.71241354942322	https://www.genecards.org/cgi-bin/carddisp.pl?gene=DERL3
THBS1	Thrombospondin 1	Protein Coding	P07996	59	GC15P039581	3.66944408416748	https://www.genecards.org/cgi-bin/carddisp.pl?gene=THBS1
PPP1R15B	Protein Phosphatase 1 Regulatory Subunit 15B	Protein Coding	Q5SWA1	49	GC01M204766	3.64814114570618	https://www.genecards.org/cgi-bin/carddisp.pl?gene=PPP1R15B
PPP1R8	Protein Phosphatase 1 Regulatory Subunit 8	Protein Coding	Q12972	49	GC01P027830	3.64814114570618	https://www.genecards.org/cgi-bin/carddisp.pl?gene=PPP1R8
CASP8	Caspase 8	Protein Coding	Q14790	65	GC02P201233	3.61536121368408	https://www.genecards.org/cgi-bin/carddisp.pl?gene=CASP8
RUVBL2	RuvB Like AAA ATPase 2	Protein Coding	Q9Y230	57	GC19P048993	3.59244823455811	https://www.genecards.org/cgi-bin/carddisp.pl?gene=RUVBL2
SGPP1	Sphingosine-1-Phosphate Phosphatase 1	Protein Coding	Q9BX95	46	GC14M063684	3.56173157691956	https://www.genecards.org/cgi-bin/carddisp.pl?gene=SGPP1
AKT1	AKT Serine/Threonine Kinase 1	Protein Coding	P31749	66	GC14M104769	3.51345062255859	https://www.genecards.org/cgi-bin/carddisp.pl?gene=AKT1
MTOR	Mechanistic Target Of Rapamycin Kinase	Protein Coding	P42345	68	GC01M011106	3.50143480300903	https://www.genecards.org/cgi-bin/carddisp.pl?gene=MTOR
APP	Amyloid Beta Precursor Protein	Protein Coding	P05067	63	GC21M025880	3.44974374771118	https://www.genecards.org/cgi-bin/carddisp.pl?gene=APP
TMEM33	Transmembrane Protein 33	Protein Coding	P57088	44	GC04P041957	3.38116025924683	https://www.genecards.org/cgi-bin/carddisp.pl?gene=TMEM33
PIGBOS1	PIGB Opposite Strand 1	Protein Coding	A0A0B4J2F0	20	GC15M055317	3.33740997314453	https://www.genecards.org/cgi-bin/carddisp.pl?gene=PIGBOS1
CLCC1	Chloride Channel CLIC Like 1	Protein Coding	Q96S66	49	GC01M108881	3.31521987915039	https://www.genecards.org/cgi-bin/carddisp.pl?gene=CLCC1
UBXN4	UBX Domain Protein 4	Protein Coding	Q92575	44	GC02P135741	3.30795812606812	https://www.genecards.org/cgi-bin/carddisp.pl?gene=UBXN4
SERP1	Stress Associated Endoplasmic Reticulum Protein 1	Protein Coding	Q9Y6X1	40	GC03M150541	3.30566310882568	https://www.genecards.org/cgi-bin/carddisp.pl?gene=SERP1
SESN2	Sestrin 2	Protein Coding	P58004	52	GC01P084534	3.29991579055786	https://www.genecards.org/cgi-bin/carddisp.pl?gene=SESN2
IKBKB	Inhibitor Of Nuclear Factor Kappa B Kinase Subunit Beta	Protein Coding	O14920	66	GC08P042271	3.26294136047363	https://www.genecards.org/cgi-bin/carddisp.pl?gene=IKBKB
CYCS	Cytochrome C, Somatic	Protein Coding	P99999	60	GC07M025118	3.24025368690491	https://www.genecards.org/cgi-bin/carddisp.pl?gene=CYCS
SQSTM1	Sequestosome 1	Protein Coding	Q13501	62	GC05P179806	3.2116870880127	https://www.genecards.org/cgi-bin/carddisp.pl?gene=SQSTM1
TMTC3	Transmembrane O-Mannosyltransferase Targeting Cadherins 3	Protein Coding	Q6ZXV5	47	GC12P088142	3.19415283203125	https://www.genecards.org/cgi-bin/carddisp.pl?gene=TMTC3
ATP2A2	ATPase Sarcoplasmic/Endoplasmic Reticulum Ca2+ Transporting 2	Protein Coding	P16615	63	GC12P110280	3.17186975479126	https://www.genecards.org/cgi-bin/carddisp.pl?gene=ATP2A2
PLD3	Phospholipase D Family Member 3	Protein Coding	Q8IV08	53	GC19P040348	3.16144847869873	https://www.genecards.org/cgi-bin/carddisp.pl?gene=PLD3
PRKCD	Protein Kinase C Delta	Protein Coding	Q05655	65	GC03P053156	3.12631154060364	https://www.genecards.org/cgi-bin/carddisp.pl?gene=PRKCD
MFN2	Mitofusin 2	Protein Coding	O95140	60	GC01P011980	3.11224508285522	https://www.genecards.org/cgi-bin/carddisp.pl?gene=MFN2
CREBBP	CREB Binding Lysine Acetyltransferase	Protein Coding	Q92793	68	GC16M052313	3.10307765007019	https://www.genecards.org/cgi-bin/carddisp.pl?gene=CREBBP
RNFT1	Ring Finger Protein, Transmembrane 1	Protein Coding	Q5M7Z0	43	GC17M059952	3.08319234848022	https://www.genecards.org/cgi-bin/carddisp.pl?gene=RNFT1
RELA	RELA Proto-Oncogene, NF-KB Subunit	Protein Coding	Q04206	64	GC11M065653	3.04602861404419	https://www.genecards.org/cgi-bin/carddisp.pl?gene=RELA
PRNP	Prion Protein (Kanno Blood Group)	Protein Coding	F7VJQ1	61	GC20P004686	3.04076266288757	https://www.genecards.org/cgi-bin/carddisp.pl?gene=PRNP
SIGMAR1	Sigma Non-Opioid Intracellular Receptor 1	Protein Coding	Q99720	59	GC09M034634	3.02823400497437	https://www.genecards.org/cgi-bin/carddisp.pl?gene=SIGMAR1
MGST2	Microsomal Glutathione S-Transferase 2	Protein Coding	Q99735	49	GC04P139665	3.01977109909058	https://www.genecards.org/cgi-bin/carddisp.pl?gene=MGST2
MAPK10	Mitogen-Activated Protein Kinase 10	Protein Coding	P53779	59	GC04M085990	3.01678228378296	https://www.genecards.org/cgi-bin/carddisp.pl?gene=MAPK10
SIRT1	Sirtuin 1	Protein Coding	Q96EB6	62	GC10P067884	3.0024721622467	https://www.genecards.org/cgi-bin/carddisp.pl?gene=SIRT1
PGR-AS1	PGR Antisense RNA 1	RNA Gene		19	GC11P116120	3.0024721622467	https://www.genecards.org/cgi-bin/carddisp.pl?gene=PGR-AS1
CREB3L4	CAMP Responsive Element Binding Protein 3 Like 4	Protein Coding	Q8TEY5	48	GC01P153967	3.00059723854065	https://www.genecards.org/cgi-bin/carddisp.pl?gene=CREB3L4
EP300	EP300 Lysine Acetyltransferase	Protein Coding	Q09472	65	GC22P097487	2.99466562271118	https://www.genecards.org/cgi-bin/carddisp.pl?gene=EP300
RNF185	Ring Finger Protein 185	Protein Coding	Q96GF1	42	GC22P031160	2.98463439941406	https://www.genecards.org/cgi-bin/carddisp.pl?gene=RNF185
MT-RNR2	Mitochondrially Encoded 16S RRNA	RNA Gene	Q8IVG9	30	GCMTP001674	2.98463439941406	https://www.genecards.org/cgi-bin/carddisp.pl?gene=MT-RNR2
DNAJB9	DnaJ Heat Shock Protein Family (Hsp40) Member B9	Protein Coding	Q9UBS3	47	GC07P108569	2.9811155796051	https://www.genecards.org/cgi-bin/carddisp.pl?gene=DNAJB9
TAOK3	TAO Kinase 3	Protein Coding	Q9H2K8	51	GC12M118149	2.97703170776367	https://www.genecards.org/cgi-bin/carddisp.pl?gene=TAOK3
GBA1	Glucosylceramidase Beta 1	Protein Coding	P04062	62	GC01M168646	2.9649064540863	https://www.genecards.org/cgi-bin/carddisp.pl?gene=GBA1
GPR37	G Protein-Coupled Receptor 37	Protein Coding	O15354	57	GC07M124745	2.95338201522827	https://www.genecards.org/cgi-bin/carddisp.pl?gene=GPR37
SEC16A	SEC16 Homolog A, Endoplasmic Reticulum Export Factor	Protein Coding	O15027	48	GC09M136440	2.95062875747681	https://www.genecards.org/cgi-bin/carddisp.pl?gene=SEC16A
MT-TP	Mitochondrially Encoded TRNA-Pro (CCN)	RNA Gene		20	GCMTM015957	2.94880747795105	https://www.genecards.org/cgi-bin/carddisp.pl?gene=MT-TP
PDIA3	Protein Disulfide Isomerase Family A Member 3	Protein Coding	P30101	57	GC15P043746	2.93531727790833	https://www.genecards.org/cgi-bin/carddisp.pl?gene=PDIA3
TNFSF10	TNF Superfamily Member 10	Protein Coding	P50591	59	GC03M172505	2.90711426734924	https://www.genecards.org/cgi-bin/carddisp.pl?gene=TNFSF10
PIK3R2	Phosphoinositide-3-Kinase Regulatory Subunit 2	Protein Coding	O00459	62	GC19P018153	2.90222549438477	https://www.genecards.org/cgi-bin/carddisp.pl?gene=PIK3R2
MAPK14	Mitogen-Activated Protein Kinase 14	Protein Coding	Q16539	65	GC06P190827	2.8784441947937	https://www.genecards.org/cgi-bin/carddisp.pl?gene=MAPK14
HMOX1	Heme Oxygenase 1	Protein Coding	P09601	65	GC22P035380	2.8404061794281	https://www.genecards.org/cgi-bin/carddisp.pl?gene=HMOX1
HTT	Huntingtin	Protein Coding	P42858	57	GC04P003041	2.8404061794281	https://www.genecards.org/cgi-bin/carddisp.pl?gene=HTT
RHO	Rhodopsin	Protein Coding	P08100	59	GC03P144186	2.81874418258667	https://www.genecards.org/cgi-bin/carddisp.pl?gene=RHO
KEAP1	Kelch Like ECH Associated Protein 1	Protein Coding	Q14145	62	GC19M010486	2.76964902877808	https://www.genecards.org/cgi-bin/carddisp.pl?gene=KEAP1
PPP1R7	Protein Phosphatase 1 Regulatory Subunit 7	Protein Coding	Q15435	49	GC02P242717	2.76072812080383	https://www.genecards.org/cgi-bin/carddisp.pl?gene=PPP1R7
STARD5	StAR Related Lipid Transfer Domain Containing 5	Protein Coding	Q9NSY2	47	GC15M081309	2.75375580787659	https://www.genecards.org/cgi-bin/carddisp.pl?gene=STARD5
LOC109279247	FGF21/FUT1 Promoter Region	Functional Element		2	GC19P162396	2.75375580787659	https://www.genecards.org/cgi-bin/carddisp.pl?gene=LOC109279247
RTN4	Reticulon 4~Name Same As:- HGNC:14084	Protein Coding	Q9NQC3	57	GC02M054934	2.7480993270874	https://www.genecards.org/cgi-bin/carddisp.pl?gene=RTN4
PARK7	Parkinsonism Associated Deglycase	Protein Coding	Q99497	60	GC01P083149	2.72247767448425	https://www.genecards.org/cgi-bin/carddisp.pl?gene=PARK7
PDIA4	Protein Disulfide Isomerase Family A Member 4	Protein Coding	P13667	53	GC07M149003	2.68770599365234	https://www.genecards.org/cgi-bin/carddisp.pl?gene=PDIA4
MCL1	MCL1 Apoptosis Regulator, BCL2 Family Member	Protein Coding	Q07820	62	GC01M168398	2.68339896202087	https://www.genecards.org/cgi-bin/carddisp.pl?gene=MCL1
ITPR1	Inositol 1,4,5-Trisphosphate Receptor Type 1	Protein Coding	Q14643	62	GC03P004500	2.6406626701355	https://www.genecards.org/cgi-bin/carddisp.pl?gene=ITPR1
CASP2	Caspase 2	Protein Coding	P42575	61	GC07P168207	2.6406626701355	https://www.genecards.org/cgi-bin/carddisp.pl?gene=CASP2
SREBF2	Sterol Regulatory Element Binding Transcription Factor 2	Protein Coding	Q12772	56	GC22P041833	2.6406626701355	https://www.genecards.org/cgi-bin/carddisp.pl?gene=SREBF2
UMOD	Uromodulin	Protein Coding	P07911	55	GC16M052793	2.6406626701355	https://www.genecards.org/cgi-bin/carddisp.pl?gene=UMOD
CRELD2	CRELD Disulfide Isomerase 2	Protein Coding	Q6UXH1	49	GC22P049918	2.63342618942261	https://www.genecards.org/cgi-bin/carddisp.pl?gene=CRELD2
OS9	OS9 Endoplasmic Reticulum Lectin	Protein Coding	Q13438	53	GC12P057693	2.63158249855042	https://www.genecards.org/cgi-bin/carddisp.pl?gene=OS9
PPP1R14C	Protein Phosphatase 1 Regulatory Inhibitor Subunit 14C	Protein Coding	Q8TAE6	48	GC06P150143	2.62966871261597	https://www.genecards.org/cgi-bin/carddisp.pl?gene=PPP1R14C
HSP90AA1	Heat Shock Protein 90 Alpha Family Class A Member 1	Protein Coding	P07900	65	GC14M102080	2.62604451179504	https://www.genecards.org/cgi-bin/carddisp.pl?gene=HSP90AA1
INS	Insulin	Protein Coding	P01308	60	GC11M002159	2.62317776679993	https://www.genecards.org/cgi-bin/carddisp.pl?gene=INS
NOD2	Nucleotide Binding Oligomerization Domain Containing 2	Protein Coding	Q9HC29	60	GC16P050693	2.61122751235962	https://www.genecards.org/cgi-bin/carddisp.pl?gene=NOD2
TRA-TGC7-1	TRNA-Ala (Anticodon TGC) 7-1	RNA Gene		14	GC06M111328	2.61122751235962	https://www.genecards.org/cgi-bin/carddisp.pl?gene=TRA-TGC7-1
PDIA2	Protein Disulfide Isomerase Family A Member 2	Protein Coding	Q13087	52	GC16P127986	2.58271718025208	https://www.genecards.org/cgi-bin/carddisp.pl?gene=PDIA2
UBE2J1	Ubiquitin Conjugating Enzyme E2 J1	Protein Coding	Q9Y385	53	GC06M089326	2.5807409286499	https://www.genecards.org/cgi-bin/carddisp.pl?gene=UBE2J1
ATP2A3	ATPase Sarcoplasmic/Endoplasmic Reticulum Ca2+ Transporting 3	Protein Coding	Q93084	55	GC17M003923	2.57547473907471	https://www.genecards.org/cgi-bin/carddisp.pl?gene=ATP2A3
MAPK1	Mitogen-Activated Protein Kinase 1	Protein Coding	P28482	66	GC22M021759	2.55835318565369	https://www.genecards.org/cgi-bin/carddisp.pl?gene=MAPK1
STAT3	Signal Transducer And Activator Of Transcription 3	Protein Coding	P40763	66	GC17M042313	2.54979395866394	https://www.genecards.org/cgi-bin/carddisp.pl?gene=STAT3
CREB1	CAMP Responsive Element Binding Protein 1	Protein Coding	P16220	63	GC02P207529	2.54979395866394	https://www.genecards.org/cgi-bin/carddisp.pl?gene=CREB1
NOS2	Nitric Oxide Synthase 2	Protein Coding	P35228	61	GC17M027756	2.54979395866394	https://www.genecards.org/cgi-bin/carddisp.pl?gene=NOS2
SERP2	Stress Associated Endoplasmic Reticulum Protein Family Member 2	Protein Coding	Q8N6R1	39	GC13P044373	2.54610109329224	https://www.genecards.org/cgi-bin/carddisp.pl?gene=SERP2
SNCA	Synuclein Alpha	Protein Coding	P37840	65	GC04M089724	2.53384399414063	https://www.genecards.org/cgi-bin/carddisp.pl?gene=SNCA
SREBF1	Sterol Regulatory Element Binding Transcription Factor 1	Protein Coding	P36956	61	GC17M017810	2.53384399414063	https://www.genecards.org/cgi-bin/carddisp.pl?gene=SREBF1
RETREG1	Reticulophagy Regulator 1	Protein Coding	Q9H6L5	49	GC05M016667	2.53384399414063	https://www.genecards.org/cgi-bin/carddisp.pl?gene=RETREG1
EGFR	Epidermal Growth Factor Receptor	Protein Coding	P00533	68	GC07P055019	2.51763486862183	https://www.genecards.org/cgi-bin/carddisp.pl?gene=EGFR
SCD	Stearoyl-CoA Desaturase	Protein Coding	O00767	62	GC10P100347	2.51763486862183	https://www.genecards.org/cgi-bin/carddisp.pl?gene=SCD
CYP2E1	Cytochrome P450 Family 2 Subfamily E Member 1	Protein Coding	P05181	59	GC10P133520	2.51298761367798	https://www.genecards.org/cgi-bin/carddisp.pl?gene=CYP2E1
VAPB	VAMP Associated Protein B And C	Protein Coding	O95292	57	GC20P058389	2.48438501358032	https://www.genecards.org/cgi-bin/carddisp.pl?gene=VAPB
SERPINA1	Serpin Family A Member 1	Protein Coding	P01009	62	GC14M094376	2.46923542022705	https://www.genecards.org/cgi-bin/carddisp.pl?gene=SERPINA1
LOC106627981	GBA Recombination Region	Functional Element		11	GC01P155233	2.46820831298828	https://www.genecards.org/cgi-bin/carddisp.pl?gene=LOC106627981
MARCHF5	Membrane Associated Ring-CH-Type Finger 5	Protein Coding	Q9NX47	49	GC10P128669	2.46731424331665	https://www.genecards.org/cgi-bin/carddisp.pl?gene=MARCHF5
IKBKG	Inhibitor Of Nuclear Factor Kappa B Kinase Regulatory Subunit Gamma	Protein Coding	Q9Y6K9	60	GC0XP154541	2.46576285362244	https://www.genecards.org/cgi-bin/carddisp.pl?gene=IKBKG
PPP1R12A	Protein Phosphatase 1 Regulatory Subunit 12A	Protein Coding	O14974	56	GC12M079773	2.45063829421997	https://www.genecards.org/cgi-bin/carddisp.pl?gene=PPP1R12A
PPP1R1B	Protein Phosphatase 1 Regulatory Inhibitor Subunit 1B	Protein Coding	Q9UD71	56	GC17P039626	2.45063829421997	https://www.genecards.org/cgi-bin/carddisp.pl?gene=PPP1R1B
PPP1R3A	Protein Phosphatase 1 Regulatory Subunit 3A	Protein Coding	Q16821	56	GC07M113876	2.45063829421997	https://www.genecards.org/cgi-bin/carddisp.pl?gene=PPP1R3A
CEBPE	CCAAT Enhancer Binding Protein Epsilon	Protein Coding	Q15744	53	GC14M023117	2.45063829421997	https://www.genecards.org/cgi-bin/carddisp.pl?gene=CEBPE
PPP1R3C	Protein Phosphatase 1 Regulatory Subunit 3C	Protein Coding	Q9UQK1	52	GC10M091628	2.45063829421997	https://www.genecards.org/cgi-bin/carddisp.pl?gene=PPP1R3C
PPP1R9B	Protein Phosphatase 1 Regulatory Subunit 9B	Protein Coding	Q96SB3	52	GC17M050133	2.45063829421997	https://www.genecards.org/cgi-bin/carddisp.pl?gene=PPP1R9B
PPP1R14A	Protein Phosphatase 1 Regulatory Inhibitor Subunit 14A	Protein Coding	Q96A00	51	GC19M038251	2.45063829421997	https://www.genecards.org/cgi-bin/carddisp.pl?gene=PPP1R14A
PPP1R10	Protein Phosphatase 1 Regulatory Subunit 10	Protein Coding	Q96QC0	50	GC06M030600	2.45063829421997	https://www.genecards.org/cgi-bin/carddisp.pl?gene=PPP1R10
CEBPG	CCAAT Enhancer Binding Protein Gamma	Protein Coding	P53567	49	GC19P033373	2.45063829421997	https://www.genecards.org/cgi-bin/carddisp.pl?gene=CEBPG
PPP1R1A	Protein Phosphatase 1 Regulatory Inhibitor Subunit 1A	Protein Coding	Q13522	49	GC12M060605	2.45063829421997	https://www.genecards.org/cgi-bin/carddisp.pl?gene=PPP1R1A
PPP1R2	Protein Phosphatase 1 Regulatory Inhibitor Subunit 2	Protein Coding	P41236	49	GC03M195515	2.45063829421997	https://www.genecards.org/cgi-bin/carddisp.pl?gene=PPP1R2
PPP1R9A	Protein Phosphatase 1 Regulatory Subunit 9A	Protein Coding	Q9ULJ8	49	GC07P094907	2.45063829421997	https://www.genecards.org/cgi-bin/carddisp.pl?gene=PPP1R9A
CEBPZ	CCAAT Enhancer Binding Protein Zeta	Protein Coding	Q03701	48	GC02M037201	2.45063829421997	https://www.genecards.org/cgi-bin/carddisp.pl?gene=CEBPZ
PPP1R3F	Protein Phosphatase 1 Regulatory Subunit 3F	Protein Coding	Q6ZSY5	48	GC0XP049269	2.45063829421997	https://www.genecards.org/cgi-bin/carddisp.pl?gene=PPP1R3F
PPP1R12B	Protein Phosphatase 1 Regulatory Subunit 12B	Protein Coding	O60237	46	GC01P202348	2.45063829421997	https://www.genecards.org/cgi-bin/carddisp.pl?gene=PPP1R12B
PPP1R12C	Protein Phosphatase 1 Regulatory Subunit 12C	Protein Coding	Q9BZL4	46	GC19M113059	2.45063829421997	https://www.genecards.org/cgi-bin/carddisp.pl?gene=PPP1R12C
PPP1R3B	Protein Phosphatase 1 Regulatory Subunit 3B	Protein Coding	Q86XI6	46	GC08M009136	2.45063829421997	https://www.genecards.org/cgi-bin/carddisp.pl?gene=PPP1R3B
PPP1R13B	Protein Phosphatase 1 Regulatory Subunit 13B	Protein Coding	Q96KQ4	45	GC14M103733	2.45063829421997	https://www.genecards.org/cgi-bin/carddisp.pl?gene=PPP1R13B
PPP1R1C	Protein Phosphatase 1 Regulatory Inhibitor Subunit 1C	Protein Coding	Q8WVI7	44	GC02P181954	2.45063829421997	https://www.genecards.org/cgi-bin/carddisp.pl?gene=PPP1R1C
PPP1R3D	Protein Phosphatase 1 Regulatory Subunit 3D	Protein Coding	O95685	44	GC20M059936	2.45063829421997	https://www.genecards.org/cgi-bin/carddisp.pl?gene=PPP1R3D
PPP1R11	Protein Phosphatase 1 Regulatory Inhibitor Subunit 11	Protein Coding	O60927	43	GC06P190673	2.45063829421997	https://www.genecards.org/cgi-bin/carddisp.pl?gene=PPP1R11
PPP1R14B	Protein Phosphatase 1 Regulatory Inhibitor Subunit 14B	Protein Coding	Q96C90	43	GC11M064244	2.45063829421997	https://www.genecards.org/cgi-bin/carddisp.pl?gene=PPP1R14B
PPP1R16B	Protein Phosphatase 1 Regulatory Subunit 16B	Protein Coding	Q96T49	43	GC20P038805	2.45063829421997	https://www.genecards.org/cgi-bin/carddisp.pl?gene=PPP1R16B
PPP1R3E	Protein Phosphatase 1 Regulatory Subunit 3E	Protein Coding	Q9H7J1	42	GC14M023295	2.45063829421997	https://www.genecards.org/cgi-bin/carddisp.pl?gene=PPP1R3E
PPP1R16A	Protein Phosphatase 1 Regulatory Subunit 16A	Protein Coding	Q96I34	41	GC08P144477	2.45063829421997	https://www.genecards.org/cgi-bin/carddisp.pl?gene=PPP1R16A
PPP1R3G	Protein Phosphatase 1 Regulatory Subunit 3G	Protein Coding	B7ZBB8	40	GC06P005085	2.45063829421997	https://www.genecards.org/cgi-bin/carddisp.pl?gene=PPP1R3G
PPP1R14D	Protein Phosphatase 1 Regulatory Inhibitor Subunit 14D	Protein Coding	Q9NXH3	37	GC15M040815	2.45063829421997	https://www.genecards.org/cgi-bin/carddisp.pl?gene=PPP1R14D
CSNK2A1	Casein Kinase 2 Alpha 1	Protein Coding	P68400	63	GC20M000472	2.44992446899414	https://www.genecards.org/cgi-bin/carddisp.pl?gene=CSNK2A1
MAP1LC3A	Microtubule Associated Protein 1 Light Chain 3 Alpha	Protein Coding	Q9H492	53	GC20P034546	2.43219709396362	https://www.genecards.org/cgi-bin/carddisp.pl?gene=MAP1LC3A
DDRGK1	DDRGK Domain Containing 1	Protein Coding	Q96HY6	46	GC20M004479	2.43219709396362	https://www.genecards.org/cgi-bin/carddisp.pl?gene=DDRGK1
NLRP3	NLR Family Pyrin Domain Containing 3	Protein Coding	Q96P20	62	GC01P247692	2.42897295951843	https://www.genecards.org/cgi-bin/carddisp.pl?gene=NLRP3
PLP1	Proteolipid Protein 1	Protein Coding	P60201	56	GC0XP103773	2.42897295951843	https://www.genecards.org/cgi-bin/carddisp.pl?gene=PLP1
LOC109245078	FGF19 5' Regulatory Region	Functional Element		2	GC11P115288	2.42641162872314	https://www.genecards.org/cgi-bin/carddisp.pl?gene=LOC109245078
SLC39A7	Solute Carrier Family 39 Member 7	Protein Coding	Q92504	55	GC06P033200	2.42054486274719	https://www.genecards.org/cgi-bin/carddisp.pl?gene=SLC39A7
MX1	MX Dynamin Like GTPase 1	Protein Coding	P20591	53	GC21P041420	2.42054486274719	https://www.genecards.org/cgi-bin/carddisp.pl?gene=MX1
PRKAA1	Protein Kinase AMP-Activated Catalytic Subunit Alpha 1	Protein Coding	Q13131	59	GC05M040759	2.41524171829224	https://www.genecards.org/cgi-bin/carddisp.pl?gene=PRKAA1
USP14	Ubiquitin Specific Peptidase 14	Protein Coding	P54578	57	GC18P000158	2.41411113739014	https://www.genecards.org/cgi-bin/carddisp.pl?gene=USP14
SEMA4A	Semaphorin 4A	Protein Coding	Q9H3S1	55	GC01P156147	2.41411113739014	https://www.genecards.org/cgi-bin/carddisp.pl?gene=SEMA4A
MYOC	Myocilin	Protein Coding	Q99972	53	GC01M171604	2.40134596824646	https://www.genecards.org/cgi-bin/carddisp.pl?gene=MYOC
RTN1	Reticulon 1	Protein Coding	Q16799	49	GC14M059595	2.37677192687988	https://www.genecards.org/cgi-bin/carddisp.pl?gene=RTN1
NFKBIA	NFKB Inhibitor Alpha	Protein Coding	P25963	63	GC14M035401	2.37552833557129	https://www.genecards.org/cgi-bin/carddisp.pl?gene=NFKBIA
PTPN1	Protein Tyrosine Phosphatase Non-Receptor Type 1	Protein Coding	P18031	63	GC20P050510	2.3730366230011	https://www.genecards.org/cgi-bin/carddisp.pl?gene=PTPN1
GJB3	Gap Junction Protein Beta 3	Protein Coding	O75712	56	GC01P034781	2.36860322952271	https://www.genecards.org/cgi-bin/carddisp.pl?gene=GJB3
RAB9B	RAB9B, Member RAS Oncogene Family	Protein Coding	Q9NP90	45	GC0XM103783	2.35860967636108	https://www.genecards.org/cgi-bin/carddisp.pl?gene=RAB9B
XIAP	X-Linked Inhibitor Of Apoptosis	Protein Coding	P98170	63	GC0XP123859	2.3574652671814	https://www.genecards.org/cgi-bin/carddisp.pl?gene=XIAP
CCL2	C-C Motif Chemokine Ligand 2	Protein Coding	P13500	62	GC17P034255	2.34399151802063	https://www.genecards.org/cgi-bin/carddisp.pl?gene=CCL2
CREBRF	CREB3 Regulatory Factor	Protein Coding	Q8IUR6	40	GC05P173056	2.34097027778625	https://www.genecards.org/cgi-bin/carddisp.pl?gene=CREBRF
LDLR	Low Density Lipoprotein Receptor	Protein Coding	P01130	64	GC19P161380	2.3376932144165	https://www.genecards.org/cgi-bin/carddisp.pl?gene=LDLR
DAB2IP	DAB2 Interacting Protein	Protein Coding	Q5VWQ8	52	GC09P155579	2.33745670318604	https://www.genecards.org/cgi-bin/carddisp.pl?gene=DAB2IP
CTRC	Chymotrypsin C	Protein Coding	Q99895	57	GC01P015438	2.32917451858521	https://www.genecards.org/cgi-bin/carddisp.pl?gene=CTRC
NFKB2	Nuclear Factor Kappa B Subunit 2	Protein Coding	Q00653	65	GC10P102394	2.31862592697144	https://www.genecards.org/cgi-bin/carddisp.pl?gene=NFKB2
NDRG1	N-Myc Downstream Regulated 1	Protein Coding	Q92597	57	GC08M133237	2.3174204826355	https://www.genecards.org/cgi-bin/carddisp.pl?gene=NDRG1
OPTN	Optineurin	Protein Coding	Q96CV9	56	GC10P013099	2.3174204826355	https://www.genecards.org/cgi-bin/carddisp.pl?gene=OPTN
SNORD15A	Small Nucleolar RNA, C/D Box 15A	RNA Gene		24	GC11P075400	2.31415033340454	https://www.genecards.org/cgi-bin/carddisp.pl?gene=SNORD15A
CASP7	Caspase 7	Protein Coding	P55210	62	GC10P113679	2.30842328071594	https://www.genecards.org/cgi-bin/carddisp.pl?gene=CASP7
SEC61A1	SEC61 Translocon Subunit Alpha 1	Protein Coding	P61619	53	GC03P128051	2.29660654067993	https://www.genecards.org/cgi-bin/carddisp.pl?gene=SEC61A1
ATAD3A	ATPase Family AAA Domain Containing 3A	Protein Coding	Q9NVI7	52	GC01P082923	2.29660654067993	https://www.genecards.org/cgi-bin/carddisp.pl?gene=ATAD3A
IER3IP1	Immediate Early Response 3 Interacting Protein 1	Protein Coding	Q9Y5U9	46	GC18M047152	2.24738121032715	https://www.genecards.org/cgi-bin/carddisp.pl?gene=IER3IP1
EIF2AK1	Eukaryotic Translation Initiation Factor 2 Alpha Kinase 1	Protein Coding	Q9BQI3	56	GC07M006022	2.24156045913696	https://www.genecards.org/cgi-bin/carddisp.pl?gene=EIF2AK1
NLRP1	NLR Family Pyrin Domain Containing 1	Protein Coding	Q9C000	56	GC17M005499	2.23889851570129	https://www.genecards.org/cgi-bin/carddisp.pl?gene=NLRP1
JKAMP	JNK1/MAPK8 Associated Membrane Protein	Protein Coding	Q9P055	43	GC14P059484	2.23889851570129	https://www.genecards.org/cgi-bin/carddisp.pl?gene=JKAMP
RPAP2	RNA Polymerase II Associated Protein 2	Protein Coding	Q8IXW5	43	GC01P092298	2.23889851570129	https://www.genecards.org/cgi-bin/carddisp.pl?gene=RPAP2
RNF19B	Ring Finger Protein 19B	Protein Coding	Q6ZMZ0	41	GC01M037589	2.23889851570129	https://www.genecards.org/cgi-bin/carddisp.pl?gene=RNF19B
CGRRF1	Cell Growth Regulator With Ring Finger Domain 1	Protein Coding	Q99675	38	GC14P054509	2.23889851570129	https://www.genecards.org/cgi-bin/carddisp.pl?gene=CGRRF1
TMEM117	Transmembrane Protein 117	Protein Coding	Q9H0C3	37	GC12P043795	2.23889851570129	https://www.genecards.org/cgi-bin/carddisp.pl?gene=TMEM117
PIN1	Peptidylprolyl Cis/Trans Isomerase, NIMA-Interacting 1	Protein Coding	Q13526	60	GC19P009835	2.23042678833008	https://www.genecards.org/cgi-bin/carddisp.pl?gene=PIN1
PSMD2	Proteasome 26S Subunit Ubiquitin Receptor, Non-ATPase 2	Protein Coding	Q13200	56	GC03P186139	2.23042678833008	https://www.genecards.org/cgi-bin/carddisp.pl?gene=PSMD2
CERS6	Ceramide Synthase 6	Protein Coding	Q6ZMG9	51	GC02P168491	2.23042678833008	https://www.genecards.org/cgi-bin/carddisp.pl?gene=CERS6
MIR451A	MicroRNA 451a	RNA Gene		25	GC17M028861	2.23042678833008	https://www.genecards.org/cgi-bin/carddisp.pl?gene=MIR451A
PIK3CG	Phosphatidylinositol-4,5-Bisphosphate 3-Kinase Catalytic Subunit Gamma	Protein Coding	P48736	62	GC07P106865	2.2191002368927	https://www.genecards.org/cgi-bin/carddisp.pl?gene=PIK3CG
UGGT1	UDP-Glucose Glycoprotein Glucosyltransferase 1	Protein Coding	Q9NYU2	53	GC02P128091	2.20691537857056	https://www.genecards.org/cgi-bin/carddisp.pl?gene=UGGT1
CFLAR	CASP8 And FADD Like Apoptosis Regulator	Protein Coding	O15519	57	GC02P204999	2.20233201980591	https://www.genecards.org/cgi-bin/carddisp.pl?gene=CFLAR
DERL1	Derlin 1	Protein Coding	Q9BUN8	47	GC08M123013	2.19077444076538	https://www.genecards.org/cgi-bin/carddisp.pl?gene=DERL1
ULK1	Unc-51 Like Autophagy Activating Kinase 1	Protein Coding	O75385	57	GC12P131894	2.18526124954224	https://www.genecards.org/cgi-bin/carddisp.pl?gene=ULK1
LMNA	Lamin A/C	Protein Coding	P02545	63	GC01P156082	2.18254828453064	https://www.genecards.org/cgi-bin/carddisp.pl?gene=LMNA
IRS1	Insulin Receptor Substrate 1	Protein Coding	P35568	60	GC02M226731	2.18254828453064	https://www.genecards.org/cgi-bin/carddisp.pl?gene=IRS1
AMFR	Autocrine Motility Factor Receptor	Protein Coding	Q9UKV5	56	GC16M056361	2.16787147521973	https://www.genecards.org/cgi-bin/carddisp.pl?gene=AMFR
ADIPOR2	Adiponectin Receptor 2	Protein Coding	Q86V24	54	GC12P001670	2.16787147521973	https://www.genecards.org/cgi-bin/carddisp.pl?gene=ADIPOR2
CPEB4	Cytoplasmic Polyadenylation Element Binding Protein 4	Protein Coding	Q17RY0	49	GC05P173888	2.15842604637146	https://www.genecards.org/cgi-bin/carddisp.pl?gene=CPEB4
TM7SF3	Transmembrane 7 Superfamily Member 3	Protein Coding	Q9NS93	44	GC12M026971	2.15842604637146	https://www.genecards.org/cgi-bin/carddisp.pl?gene=TM7SF3
TUBB4A	Tubulin Beta 4A Class IVa	Protein Coding	P04350	59	GC19M111727	2.15722441673279	https://www.genecards.org/cgi-bin/carddisp.pl?gene=TUBB4A
SDF4	Stromal Cell Derived Factor 4	Protein Coding	Q9BRK5	51	GC01M001216	2.15722441673279	https://www.genecards.org/cgi-bin/carddisp.pl?gene=SDF4
EEF2	Eukaryotic Translation Elongation Factor 2	Protein Coding	P13639	61	GC19M003976	2.15014410018921	https://www.genecards.org/cgi-bin/carddisp.pl?gene=EEF2
ERP29	Endoplasmic Reticulum Protein 29	Protein Coding	P30040	47	GC12P112013	2.15014410018921	https://www.genecards.org/cgi-bin/carddisp.pl?gene=ERP29
MGAT5	Alpha-1,6-Mannosylglycoprotein 6-Beta-N-Acetylglucosaminyltransferase	Protein Coding	Q09328	53	GC02P134119	2.13205814361572	https://www.genecards.org/cgi-bin/carddisp.pl?gene=MGAT5
TLR4	Toll Like Receptor 4	Protein Coding	O00206	63	GC09P117704	2.11478424072266	https://www.genecards.org/cgi-bin/carddisp.pl?gene=TLR4
HSPA8	Heat Shock Protein Family A (Hsp70) Member 8	Protein Coding	P11142	62	GC11M123057	2.11359167098999	https://www.genecards.org/cgi-bin/carddisp.pl?gene=HSPA8
BECN1	Beclin 1	Protein Coding	Q14457	59	GC17M042810	2.11359167098999	https://www.genecards.org/cgi-bin/carddisp.pl?gene=BECN1
TARDBP	TAR DNA Binding Protein	Protein Coding	Q13148	59	GC01P083318	2.11359167098999	https://www.genecards.org/cgi-bin/carddisp.pl?gene=TARDBP
PPARA	Peroxisome Proliferator Activated Receptor Alpha	Protein Coding	Q07869	57	GC22P046150	2.11359167098999	https://www.genecards.org/cgi-bin/carddisp.pl?gene=PPARA
TBL2	Transducin Beta Like 2	Protein Coding	Q9Y4P3	50	GC07M082030	2.11359167098999	https://www.genecards.org/cgi-bin/carddisp.pl?gene=TBL2
NR1H2	Nuclear Receptor Subfamily 1 Group H Member 2	Protein Coding	P55055	59	GC19P050329	2.11045503616333	https://www.genecards.org/cgi-bin/carddisp.pl?gene=NR1H2
GORASP1	Golgi Reassembly Stacking Protein 1	Protein Coding	Q9BQQ3	53	GC03M039096	2.11045503616333	https://www.genecards.org/cgi-bin/carddisp.pl?gene=GORASP1
CARD16	Caspase Recruitment Domain Family Member 16	Protein Coding	Q5EG05	45	GC11M143629	2.11045503616333	https://www.genecards.org/cgi-bin/carddisp.pl?gene=CARD16
EEF1AKMT3	EEF1A Lysine Methyltransferase 3	Protein Coding	Q96AZ1	36	GC12P081706	2.11045503616333	https://www.genecards.org/cgi-bin/carddisp.pl?gene=EEF1AKMT3
TMEM238L	Transmembrane Protein 238 Like	Protein Coding	A6NJY4	27	GC17M100068	2.11045503616333	https://www.genecards.org/cgi-bin/carddisp.pl?gene=TMEM238L
KCNH2	Potassium Voltage-Gated Channel Subfamily H Member 2	Protein Coding	Q12809	63	GC07M150944	2.10318875312805	https://www.genecards.org/cgi-bin/carddisp.pl?gene=KCNH2
STIM1	Stromal Interaction Molecule 1	Protein Coding	Q13586	62	GC11P022826	2.10318875312805	https://www.genecards.org/cgi-bin/carddisp.pl?gene=STIM1
PWAR4	Prader Willi/Angelman Region RNA 4	RNA Gene		17	GC15P025211	2.10165691375732	https://www.genecards.org/cgi-bin/carddisp.pl?gene=PWAR4
FOXO1	Forkhead Box O1	Protein Coding	Q12778	64	GC13M040555	2.09471893310547	https://www.genecards.org/cgi-bin/carddisp.pl?gene=FOXO1
COPA	COPI Coat Complex Subunit Alpha	Protein Coding	P53621	55	GC01M160288	2.07541227340698	https://www.genecards.org/cgi-bin/carddisp.pl?gene=COPA
DNAJB11	DnaJ Heat Shock Protein Family (Hsp40) Member B11	Protein Coding	Q9UBS4	51	GC03P186567	2.07541227340698	https://www.genecards.org/cgi-bin/carddisp.pl?gene=DNAJB11
BIRC2	Baculoviral IAP Repeat Containing 2	Protein Coding	Q13490	61	GC11P102347	2.07496690750122	https://www.genecards.org/cgi-bin/carddisp.pl?gene=BIRC2
ATP13A2	ATPase Cation Transporting 13A2	Protein Coding	Q9NQ11	56	GC01M016985	2.07413625717163	https://www.genecards.org/cgi-bin/carddisp.pl?gene=ATP13A2
SMPD2	Sphingomyelin Phosphodiesterase 2	Protein Coding	O60906	53	GC06P109440	2.05564022064209	https://www.genecards.org/cgi-bin/carddisp.pl?gene=SMPD2
PDIA6	Protein Disulfide Isomerase Family A Member 6	Protein Coding	Q15084	52	GC02M010784	2.05564022064209	https://www.genecards.org/cgi-bin/carddisp.pl?gene=PDIA6
ERP27	Endoplasmic Reticulum Protein 27	Protein Coding	Q96DN0	45	GC12M014914	2.05355262756348	https://www.genecards.org/cgi-bin/carddisp.pl?gene=ERP27
PARP1	Poly(ADP-Ribose) Polymerase 1	Protein Coding	P09874	65	GC01M226360	2.04766321182251	https://www.genecards.org/cgi-bin/carddisp.pl?gene=PARP1
BSCL2	BSCL2 Lipid Droplet Biogenesis Associated, Seipin	Protein Coding	Q96G97	55	GC11M142868	2.04766321182251	https://www.genecards.org/cgi-bin/carddisp.pl?gene=BSCL2
TRC-GCA24-1	TRNA-Cys (GCA) 24-1	RNA Gene		14	GC17M100844	2.04766321182251	https://www.genecards.org/cgi-bin/carddisp.pl?gene=TRC-GCA24-1
TNFSF11	TNF Superfamily Member 11	Protein Coding	O14788	62	GC13P042562	2.03536748886108	https://www.genecards.org/cgi-bin/carddisp.pl?gene=TNFSF11
VEGFA	Vascular Endothelial Growth Factor A	Protein Coding	P15692	61	GC06P043770	2.03536748886108	https://www.genecards.org/cgi-bin/carddisp.pl?gene=VEGFA
LEP	Leptin	Protein Coding	P41159	59	GC07P128241	2.03536748886108	https://www.genecards.org/cgi-bin/carddisp.pl?gene=LEP
HSPA1B	Heat Shock Protein Family A (Hsp70) Member 1B	Protein Coding	P0DMV9	54	GC06P190724	2.03536748886108	https://www.genecards.org/cgi-bin/carddisp.pl?gene=HSPA1B
TNF	Tumor Necrosis Factor	Protein Coding	P01375	63	GC06P190708	2.01970100402832	https://www.genecards.org/cgi-bin/carddisp.pl?gene=TNF
KRAS	KRAS Proto-Oncogene, GTPase	Protein Coding	P01116	66	GC12M037206	2.01455354690552	https://www.genecards.org/cgi-bin/carddisp.pl?gene=KRAS
HMGB1	High Mobility Group Box 1	Protein Coding	P09429	63	GC13M030456	2.01455354690552	https://www.genecards.org/cgi-bin/carddisp.pl?gene=HMGB1
CASP1	Caspase 1	Protein Coding	P29466	62	GC11M105025	2.01455354690552	https://www.genecards.org/cgi-bin/carddisp.pl?gene=CASP1
FOXO3	Forkhead Box O3	Protein Coding	O43524	61	GC06P108559	2.01455354690552	https://www.genecards.org/cgi-bin/carddisp.pl?gene=FOXO3
UBE2N	Ubiquitin Conjugating Enzyme E2 N	Protein Coding	P61088	59	GC12M093406	2.01455354690552	https://www.genecards.org/cgi-bin/carddisp.pl?gene=UBE2N
NOD1	Nucleotide Binding Oligomerization Domain Containing 1	Protein Coding	Q9Y239	56	GC07M030424	2.01455354690552	https://www.genecards.org/cgi-bin/carddisp.pl?gene=NOD1
HSPH1	Heat Shock Protein Family H (Hsp110) Member 1	Protein Coding	Q92598	54	GC13M031134	2.01455354690552	https://www.genecards.org/cgi-bin/carddisp.pl?gene=HSPH1
SLC1A5	Solute Carrier Family 1 Member 5	Protein Coding	Q15758	58	GC19M112719	2.0107147693634	https://www.genecards.org/cgi-bin/carddisp.pl?gene=SLC1A5
PPIB	Peptidylprolyl Isomerase B	Protein Coding	P23284	62	GC15M064155	1.99315321445465	https://www.genecards.org/cgi-bin/carddisp.pl?gene=PPIB
ERLIN2	ER Lipid Raft Associated 2	Protein Coding	O94905	55	GC08P037736	1.99315321445465	https://www.genecards.org/cgi-bin/carddisp.pl?gene=ERLIN2
EIF5B	Eukaryotic Translation Initiation Factor 5B	Protein Coding	O60841	51	GC02P099337	1.99315321445465	https://www.genecards.org/cgi-bin/carddisp.pl?gene=EIF5B
PRKAA2	Protein Kinase AMP-Activated Catalytic Subunit Alpha 2	Protein Coding	P54646	62	GC01P056645	1.99103105068207	https://www.genecards.org/cgi-bin/carddisp.pl?gene=PRKAA2
ALOX15	Arachidonate 15-Lipoxygenase	Protein Coding	P16050	59	GC17M004630	1.97939562797546	https://www.genecards.org/cgi-bin/carddisp.pl?gene=ALOX15
NR1H3	Nuclear Receptor Subfamily 1 Group H Member 3	Protein Coding	Q13133	59	GC11P047248	1.97939562797546	https://www.genecards.org/cgi-bin/carddisp.pl?gene=NR1H3
TMEM259	Transmembrane Protein 259	Protein Coding	Q4ZIN3	41	GC19M111508	1.97939562797546	https://www.genecards.org/cgi-bin/carddisp.pl?gene=TMEM259
ABCA3	ATP Binding Cassette Subfamily A Member 3	Protein Coding	Q99758	62	GC16M002275	1.97557806968689	https://www.genecards.org/cgi-bin/carddisp.pl?gene=ABCA3
GLA	Galactosidase Alpha	Protein Coding	P06280	62	GC0XM101393	1.97557806968689	https://www.genecards.org/cgi-bin/carddisp.pl?gene=GLA
NPR2	Natriuretic Peptide Receptor 2	Protein Coding	P20594	60	GC09P078072	1.97557806968689	https://www.genecards.org/cgi-bin/carddisp.pl?gene=NPR2
ROCK1	Rho Associated Coiled-Coil Containing Protein Kinase 1	Protein Coding	Q13464	62	GC18M039163	1.97111356258392	https://www.genecards.org/cgi-bin/carddisp.pl?gene=ROCK1
PCK2	Phosphoenolpyruvate Carboxykinase 2, Mitochondrial	Protein Coding	Q16822	58	GC14P024094	1.97111356258392	https://www.genecards.org/cgi-bin/carddisp.pl?gene=PCK2
RPS3	Ribosomal Protein S3	Protein Coding	P23396	55	GC11P115470	1.97111356258392	https://www.genecards.org/cgi-bin/carddisp.pl?gene=RPS3
NOTCH3	Notch Receptor 3	Protein Coding	Q9UM47	64	GC19M015159	1.94837367534637	https://www.genecards.org/cgi-bin/carddisp.pl?gene=NOTCH3
NPY	Neuropeptide Y	Protein Coding	P01303	58	GC07P026120	1.94837367534637	https://www.genecards.org/cgi-bin/carddisp.pl?gene=NPY
UBE2D2	Ubiquitin Conjugating Enzyme E2 D2	Protein Coding	P62837	56	GC05P139526	1.94837367534637	https://www.genecards.org/cgi-bin/carddisp.pl?gene=UBE2D2
SEC31A	SEC31 Homolog A, COPII Coat Complex Component	Protein Coding	O94979	55	GC04M082818	1.94837367534637	https://www.genecards.org/cgi-bin/carddisp.pl?gene=SEC31A
MIR663A	MicroRNA 663a	RNA Gene		23	GC20M026208	1.94837367534637	https://www.genecards.org/cgi-bin/carddisp.pl?gene=MIR663A
TRP-AGG2-5	TRNA-Pro (Anticodon AGG) 2-5	RNA Gene		18	GC14M029109	1.94837367534637	https://www.genecards.org/cgi-bin/carddisp.pl?gene=TRP-AGG2-5
SNHG1	Small Nucleolar RNA Host Gene 1	RNA Gene		28	GC11M142874	1.94657158851624	https://www.genecards.org/cgi-bin/carddisp.pl?gene=SNHG1
COMP	Cartilage Oligomeric Matrix Protein	Protein Coding	P49747	59	GC19M112180	1.92486238479614	https://www.genecards.org/cgi-bin/carddisp.pl?gene=COMP
IRAK2	Interleukin 1 Receptor Associated Kinase 2	Protein Coding	O43187	52	GC03P028791	1.92486238479614	https://www.genecards.org/cgi-bin/carddisp.pl?gene=IRAK2
ATG14	Autophagy Related 14	Protein Coding	Q6ZNE5	49	GC14M055366	1.92486238479614	https://www.genecards.org/cgi-bin/carddisp.pl?gene=ATG14
ASB7	Ankyrin Repeat And SOCS Box Containing 7	Protein Coding	Q9H672	43	GC15P100602	1.92486238479614	https://www.genecards.org/cgi-bin/carddisp.pl?gene=ASB7
FAM3A	FAM3 Metabolism Regulating Signaling Molecule A	Protein Coding	P98173	43	GC0XM154506	1.92486238479614	https://www.genecards.org/cgi-bin/carddisp.pl?gene=FAM3A
MIR204	MicroRNA 204	RNA Gene		30	GC09M070809	1.92486238479614	https://www.genecards.org/cgi-bin/carddisp.pl?gene=MIR204
PPARG	Peroxisome Proliferator Activated Receptor Gamma	Protein Coding	P37231	65	GC03P012287	1.91586482524872	https://www.genecards.org/cgi-bin/carddisp.pl?gene=PPARG
SLC39A14	Solute Carrier Family 39 Member 14	Protein Coding	Q15043	56	GC08P022367	1.91586482524872	https://www.genecards.org/cgi-bin/carddisp.pl?gene=SLC39A14
YWHAE	Tyrosine 3-Monooxygenase/Tryptophan 5-Monooxygenase Activation Protein Epsilon	Protein Coding	P62258	63	GC17M099664	1.90049529075623	https://www.genecards.org/cgi-bin/carddisp.pl?gene=YWHAE
CHI3L1	Chitinase 3 Like 1	Protein Coding	P36222	59	GC01M203148	1.90049529075623	https://www.genecards.org/cgi-bin/carddisp.pl?gene=CHI3L1
PRDX2	Peroxiredoxin 2	Protein Coding	P32119	59	GC19M012796	1.90049529075623	https://www.genecards.org/cgi-bin/carddisp.pl?gene=PRDX2
PSMA5	Proteasome 20S Subunit Alpha 5	Protein Coding	P28066	56	GC01M109399	1.90049529075623	https://www.genecards.org/cgi-bin/carddisp.pl?gene=PSMA5
CAMP	Cathelicidin Antimicrobial Peptide	Protein Coding	P49913	53	GC03P066824	1.90049529075623	https://www.genecards.org/cgi-bin/carddisp.pl?gene=CAMP
MIR23A	MicroRNA 23a	RNA Gene		30	GC19M112018	1.90049529075623	https://www.genecards.org/cgi-bin/carddisp.pl?gene=MIR23A
TGFB1	Transforming Growth Factor Beta 1	Protein Coding	P01137	65	GC19M041301	1.90016233921051	https://www.genecards.org/cgi-bin/carddisp.pl?gene=TGFB1
ADIPOQ	Adiponectin, C1Q And Collagen Domain Containing	Protein Coding	Q15848	59	GC03P186842	1.88421249389648	https://www.genecards.org/cgi-bin/carddisp.pl?gene=ADIPOQ
EEF1A1	Eukaryotic Translation Elongation Factor 1 Alpha 1	Protein Coding	P68104	57	GC06M112131	1.88223600387573	https://www.genecards.org/cgi-bin/carddisp.pl?gene=EEF1A1
STK11	Serine/Threonine Kinase 11	Protein Coding	Q15831	62	GC19P001177	1.87517142295837	https://www.genecards.org/cgi-bin/carddisp.pl?gene=STK11
STING1	Stimulator Of Interferon Response CGAMP Interactor 1	Protein Coding	Q86WV6	55	GC05M139503	1.87517142295837	https://www.genecards.org/cgi-bin/carddisp.pl?gene=STING1
CDNF	Cerebral Dopamine Neurotrophic Factor	Protein Coding	Q49AH0	50	GC10M014819	1.87517142295837	https://www.genecards.org/cgi-bin/carddisp.pl?gene=CDNF
LACC1	Laccase Domain Containing 1	Protein Coding	Q8IV20	47	GC13P043879	1.87517142295837	https://www.genecards.org/cgi-bin/carddisp.pl?gene=LACC1
SEC61B	SEC61 Translocon Subunit Beta	Protein Coding	P60468	47	GC09P099222	1.87517142295837	https://www.genecards.org/cgi-bin/carddisp.pl?gene=SEC61B
BNIP1	BCL2 Interacting Protein 1	Protein Coding	Q12981	46	GC05P173144	1.87517142295837	https://www.genecards.org/cgi-bin/carddisp.pl?gene=BNIP1
PTGS2	Prostaglandin-Endoperoxide Synthase 2	Protein Coding	P35354	63	GC01M186671	1.86800336837769	https://www.genecards.org/cgi-bin/carddisp.pl?gene=PTGS2
IL1B	Interleukin 1 Beta	Protein Coding	P01584	60	GC02M112829	1.86800336837769	https://www.genecards.org/cgi-bin/carddisp.pl?gene=IL1B
APOB	Apolipoprotein B	Protein Coding	P04114	59	GC02M020956	1.86800336837769	https://www.genecards.org/cgi-bin/carddisp.pl?gene=APOB
MAPK3	Mitogen-Activated Protein Kinase 3	Protein Coding	P27361	62	GC16M053300	1.85152161121368	https://www.genecards.org/cgi-bin/carddisp.pl?gene=MAPK3
MYC	MYC Proto-Oncogene, BHLH Transcription Factor	Protein Coding	P01106	65	GC08P127735	1.8487685918808	https://www.genecards.org/cgi-bin/carddisp.pl?gene=MYC
DAPK1	Death Associated Protein Kinase 1	Protein Coding	P53355	62	GC09P087497	1.8487685918808	https://www.genecards.org/cgi-bin/carddisp.pl?gene=DAPK1
PHGDH	Phosphoglycerate Dehydrogenase	Protein Coding	O43175	62	GC01P119774	1.8487685918808	https://www.genecards.org/cgi-bin/carddisp.pl?gene=PHGDH
TUBB	Tubulin Beta Class I	Protein Coding	P07437	62	GC06P190688	1.8487685918808	https://www.genecards.org/cgi-bin/carddisp.pl?gene=TUBB
CPE	Carboxypeptidase E	Protein Coding	P16870	60	GC04P165361	1.8487685918808	https://www.genecards.org/cgi-bin/carddisp.pl?gene=CPE
SIRT7	Sirtuin 7	Protein Coding	Q9NRC8	56	GC17M081911	1.8487685918808	https://www.genecards.org/cgi-bin/carddisp.pl?gene=SIRT7
COPB2	COPI Coat Complex Subunit Beta 2	Protein Coding	P35606	55	GC03M139355	1.8487685918808	https://www.genecards.org/cgi-bin/carddisp.pl?gene=COPB2
SEC62	SEC62 Homolog, Preprotein Translocation Factor	Protein Coding	Q99442	46	GC03P169966	1.8487685918808	https://www.genecards.org/cgi-bin/carddisp.pl?gene=SEC62
RICTOR	RPTOR Independent Companion Of MTOR Complex 2	Protein Coding	Q6R327	56	GC05M038937	1.84713459014893	https://www.genecards.org/cgi-bin/carddisp.pl?gene=RICTOR
TMEM258	Transmembrane Protein 258	Protein Coding	P61165	43	GC11M061768	1.84713459014893	https://www.genecards.org/cgi-bin/carddisp.pl?gene=TMEM258
HIF1A	Hypoxia Inducible Factor 1 Subunit Alpha	Protein Coding	Q16665	62	GC14P061695	1.8347532749176	https://www.genecards.org/cgi-bin/carddisp.pl?gene=HIF1A
CDKN2A	Cyclin Dependent Kinase Inhibitor 2A	Protein Coding	Q8N726	63	GC09M021967	1.82113575935364	https://www.genecards.org/cgi-bin/carddisp.pl?gene=CDKN2A
ASS1	Argininosuccinate Synthase 1	Protein Coding	P00966	62	GC09P130444	1.82113575935364	https://www.genecards.org/cgi-bin/carddisp.pl?gene=ASS1
FADD	Fas Associated Via Death Domain	Protein Coding	Q13158	59	GC11P070203	1.82113575935364	https://www.genecards.org/cgi-bin/carddisp.pl?gene=FADD
FAP	Fibroblast Activation Protein Alpha	Protein Coding	Q12884	59	GC02M162170	1.82113575935364	https://www.genecards.org/cgi-bin/carddisp.pl?gene=FAP
SERPINH1	Serpin Family H Member 1	Protein Coding	P50454	59	GC11P075562	1.82113575935364	https://www.genecards.org/cgi-bin/carddisp.pl?gene=SERPINH1
GFER	Growth Factor, Augmenter Of Liver Regeneration	Protein Coding	P55789	57	GC16P001984	1.82113575935364	https://www.genecards.org/cgi-bin/carddisp.pl?gene=GFER
NACA	Nascent Polypeptide Associated Complex Subunit Alpha	Protein Coding	E9PAV3	46	GC12M056712	1.82113575935364	https://www.genecards.org/cgi-bin/carddisp.pl?gene=NACA
PSEN1	Presenilin 1	Protein Coding	P49768	66	GC14P073136	1.81768262386322	https://www.genecards.org/cgi-bin/carddisp.pl?gene=PSEN1
CAPN2	Calpain 2	Protein Coding	P17655	60	GC01P223701	1.81768262386322	https://www.genecards.org/cgi-bin/carddisp.pl?gene=CAPN2
DNAJC12	DnaJ Heat Shock Protein Family (Hsp40) Member C12	Protein Coding	Q9UKB3	52	GC10M067796	1.80036520957947	https://www.genecards.org/cgi-bin/carddisp.pl?gene=DNAJC12
LPCAT3	Lysophosphatidylcholine Acyltransferase 3	Protein Coding	Q6P1A2	49	GC12M006976	1.80036520957947	https://www.genecards.org/cgi-bin/carddisp.pl?gene=LPCAT3
PLD4	Phospholipase D Family Member 4	Protein Coding	Q96BZ4	46	GC14P104924	1.80036520957947	https://www.genecards.org/cgi-bin/carddisp.pl?gene=PLD4
ILDR2	Immunoglobulin Like Domain Containing Receptor 2	Protein Coding	Q71H61	44	GC01M168932	1.80036520957947	https://www.genecards.org/cgi-bin/carddisp.pl?gene=ILDR2
CTNNB1	Catenin Beta 1	Protein Coding	P35222	66	GC03P041194	1.79208314418793	https://www.genecards.org/cgi-bin/carddisp.pl?gene=CTNNB1
UCHL1	Ubiquitin C-Terminal Hydrolase L1	Protein Coding	P09936	65	GC04P041256	1.79208314418793	https://www.genecards.org/cgi-bin/carddisp.pl?gene=UCHL1
ABCA1	ATP Binding Cassette Subfamily A Member 1	Protein Coding	O95477	62	GC09M104781	1.79208314418793	https://www.genecards.org/cgi-bin/carddisp.pl?gene=ABCA1
TPT1	Tumor Protein, Translationally-Controlled 1	Protein Coding	P13693	60	GC13M045333	1.79208314418793	https://www.genecards.org/cgi-bin/carddisp.pl?gene=TPT1
FKBP4	FKBP Prolyl Isomerase 4	Protein Coding	Q02790	57	GC12P080174	1.79208314418793	https://www.genecards.org/cgi-bin/carddisp.pl?gene=FKBP4
STIP1	Stress Induced Phosphoprotein 1	Protein Coding	P31948	57	GC11P114939	1.79208314418793	https://www.genecards.org/cgi-bin/carddisp.pl?gene=STIP1
UFD1	Ubiquitin Recognition Factor In ER Associated Degradation 1	Protein Coding	Q92890	56	GC22M087895	1.79208314418793	https://www.genecards.org/cgi-bin/carddisp.pl?gene=UFD1
SENP1	SUMO Specific Peptidase 1	Protein Coding	Q9P0U3	55	GC12M048042	1.79208314418793	https://www.genecards.org/cgi-bin/carddisp.pl?gene=SENP1
SEC23A	SEC23 Homolog A, COPII Coat Complex Component	Protein Coding	Q15436	54	GC14M039031	1.79208314418793	https://www.genecards.org/cgi-bin/carddisp.pl?gene=SEC23A
SELENON	Selenoprotein N	Protein Coding	Q9NZV5	51	GC01P025800	1.79208314418793	https://www.genecards.org/cgi-bin/carddisp.pl?gene=SELENON
MT-ATP6	Mitochondrially Encoded ATP Synthase Membrane Subunit 6	Protein Coding	P00846	44	GCMTP008531	1.79208314418793	https://www.genecards.org/cgi-bin/carddisp.pl?gene=MT-ATP6
TERT	Telomerase Reverse Transcriptase	Protein Coding	O14746	64	GC05M001253	1.7825653553009	https://www.genecards.org/cgi-bin/carddisp.pl?gene=TERT
TRE-TTC3-1	TRNA-Glu (Anticodon TTC) 3-1	RNA Gene		17	GC01P083705	1.76448	https://www.genecards.org/cgi-bin/carddisp.pl?gene=TRE-TTC3-1
ATP1A1	ATPase Na+/K+ Transporting Subunit Alpha 1	Protein Coding	P05023	62	GC01P116372	1.76136636734009	https://www.genecards.org/cgi-bin/carddisp.pl?gene=ATP1A1
RAB7A	RAB7A, Member RAS Oncogene Family	Protein Coding	P51149	61	GC03P144168	1.76136636734009	https://www.genecards.org/cgi-bin/carddisp.pl?gene=RAB7A
PDX1	Pancreatic And Duodenal Homeobox 1	Protein Coding	P52945	58	GC13P029317	1.76136636734009	https://www.genecards.org/cgi-bin/carddisp.pl?gene=PDX1
DHCR24	24-Dehydrocholesterol Reductase	Protein Coding	Q15392	57	GC01M054849	1.76136636734009	https://www.genecards.org/cgi-bin/carddisp.pl?gene=DHCR24
COL4A5	Collagen Type IV Alpha 5 Chain	Protein Coding	P29400	56	GC0XP108439	1.76136636734009	https://www.genecards.org/cgi-bin/carddisp.pl?gene=COL4A5
RPS27A	Ribosomal Protein S27a	Protein Coding	P62979	56	GC02P055231	1.76136636734009	https://www.genecards.org/cgi-bin/carddisp.pl?gene=RPS27A
ENTPD5	Ectonucleoside Triphosphate Diphosphohydrolase 5 (Inactive)	Protein Coding	O75356	55	GC14M074227	1.76136636734009	https://www.genecards.org/cgi-bin/carddisp.pl?gene=ENTPD5
RPLP0	Ribosomal Protein Lateral Stalk Subunit P0	Protein Coding	P05388	55	GC12M120196	1.76136636734009	https://www.genecards.org/cgi-bin/carddisp.pl?gene=RPLP0
TMEM43	Transmembrane Protein 43	Protein Coding	Q9BTV4	55	GC03P028862	1.76136636734009	https://www.genecards.org/cgi-bin/carddisp.pl?gene=TMEM43
COPB1	COPI Coat Complex Subunit Beta 1	Protein Coding	P53618	53	GC11M016235	1.76136636734009	https://www.genecards.org/cgi-bin/carddisp.pl?gene=COPB1
RPN2	Ribophorin II	Protein Coding	P04844	52	GC20P037178	1.76136636734009	https://www.genecards.org/cgi-bin/carddisp.pl?gene=RPN2
RPS28	Ribosomal Protein S28	Protein Coding	P62857	52	GC19P161252	1.76136636734009	https://www.genecards.org/cgi-bin/carddisp.pl?gene=RPS28
GDI2	GDP Dissociation Inhibitor 2	Protein Coding	P50395	50	GC10M005765	1.76136636734009	https://www.genecards.org/cgi-bin/carddisp.pl?gene=GDI2
IPO5	Importin 5	Protein Coding	O00410	49	GC13P097953	1.76136636734009	https://www.genecards.org/cgi-bin/carddisp.pl?gene=IPO5
ZFYVE1	Zinc Finger FYVE-Type Containing 1	Protein Coding	Q9HBF4	47	GC14M072969	1.76136636734009	https://www.genecards.org/cgi-bin/carddisp.pl?gene=ZFYVE1
TM9SF4	Transmembrane 9 Superfamily Member 4	Protein Coding	Q92544	46	GC20P032109	1.76136636734009	https://www.genecards.org/cgi-bin/carddisp.pl?gene=TM9SF4
MYDGF	Myeloid Derived Growth Factor	Protein Coding	Q969H8	45	GC19M004641	1.76136636734009	https://www.genecards.org/cgi-bin/carddisp.pl?gene=MYDGF
NUPR1	Nuclear Protein 1, Transcriptional Regulator	Protein Coding	O60356	43	GC16M028532	1.76136636734009	https://www.genecards.org/cgi-bin/carddisp.pl?gene=NUPR1
MIR107	MicroRNA 107	RNA Gene		27	GC10M089604	1.76136636734009	https://www.genecards.org/cgi-bin/carddisp.pl?gene=MIR107
MAP2K1	Mitogen-Activated Protein Kinase Kinase 1	Protein Coding	Q02750	67	GC15P066386	1.74601304531097	https://www.genecards.org/cgi-bin/carddisp.pl?gene=MAP2K1
PLA2G6	Phospholipase A2 Group VI	Protein Coding	O60733	60	GC22M090050	1.74601304531097	https://www.genecards.org/cgi-bin/carddisp.pl?gene=PLA2G6
BIRC3	Baculoviral IAP Repeat Containing 3	Protein Coding	Q13489	59	GC11P102317	1.74601304531097	https://www.genecards.org/cgi-bin/carddisp.pl?gene=BIRC3
TOR1A	Torsin Family 1 Member A	Protein Coding	O14656	59	GC09M129812	1.74601304531097	https://www.genecards.org/cgi-bin/carddisp.pl?gene=TOR1A
POR	Cytochrome P450 Oxidoreductase	Protein Coding	P16435	61	GC07P075899	1.72866177558899	https://www.genecards.org/cgi-bin/carddisp.pl?gene=POR
NR4A1	Nuclear Receptor Subfamily 4 Group A Member 1	Protein Coding	P22736	60	GC12P052022	1.72866177558899	https://www.genecards.org/cgi-bin/carddisp.pl?gene=NR4A1
APRT	Adenine Phosphoribosyltransferase	Protein Coding	P07741	59	GC16M088810	1.72866177558899	https://www.genecards.org/cgi-bin/carddisp.pl?gene=APRT
LBR	Lamin B Receptor	Protein Coding	Q14739	59	GC01M225401	1.72866177558899	https://www.genecards.org/cgi-bin/carddisp.pl?gene=LBR
EMD	Emerin	Protein Coding	P50402	57	GC0XP154379	1.72866177558899	https://www.genecards.org/cgi-bin/carddisp.pl?gene=EMD
GOLGA2	Golgin A2	Protein Coding	Q08379	55	GC09M128255	1.72866177558899	https://www.genecards.org/cgi-bin/carddisp.pl?gene=GOLGA2
TARS1	Threonyl-TRNA Synthetase 1	Protein Coding	P26639	54	GC05P033869	1.72866177558899	https://www.genecards.org/cgi-bin/carddisp.pl?gene=TARS1
ERLIN1	ER Lipid Raft Associated 1	Protein Coding	O75477	53	GC10M100150	1.72866177558899	https://www.genecards.org/cgi-bin/carddisp.pl?gene=ERLIN1
AUP1	AUP1 Lipid Droplet Regulating VLDL Assembly Factor	Protein Coding	Q9Y679	49	GC02M074526	1.72866177558899	https://www.genecards.org/cgi-bin/carddisp.pl?gene=AUP1
UFL1	UFM1 Specific Ligase 1	Protein Coding	O94874	47	GC06P096521	1.72714042663574	https://www.genecards.org/cgi-bin/carddisp.pl?gene=UFL1
MEG3	Maternally Expressed 3	RNA Gene		36	GC14P122485	1.72714042663574	https://www.genecards.org/cgi-bin/carddisp.pl?gene=MEG3
MIR34C	MicroRNA 34c	RNA Gene		30	GC11P116366	1.72714042663574	https://www.genecards.org/cgi-bin/carddisp.pl?gene=MIR34C
NGF	Nerve Growth Factor	Protein Coding	P01138	64	GC01M115285	1.70783376693726	https://www.genecards.org/cgi-bin/carddisp.pl?gene=NGF
HSPA1A	Heat Shock Protein Family A (Hsp70) Member 1A	Protein Coding	P0DMV8	60	GC06P190725	1.70783376693726	https://www.genecards.org/cgi-bin/carddisp.pl?gene=HSPA1A
LCN2	Lipocalin 2	Protein Coding	P80188	58	GC09P128149	1.70783376693726	https://www.genecards.org/cgi-bin/carddisp.pl?gene=LCN2
ACACA	Acetyl-CoA Carboxylase Alpha	Protein Coding	Q13085	62	GC17M037084	1.69352507591248	https://www.genecards.org/cgi-bin/carddisp.pl?gene=ACACA
BIRC5	Baculoviral IAP Repeat Containing 5	Protein Coding	O15392	59	GC17P078214	1.69352507591248	https://www.genecards.org/cgi-bin/carddisp.pl?gene=BIRC5
TMPO	Thymopoietin	Protein Coding	P42166	59	GC12P098515	1.69352507591248	https://www.genecards.org/cgi-bin/carddisp.pl?gene=TMPO
PSMB5	Proteasome 20S Subunit Beta 5	Protein Coding	P28074	57	GC14M023016	1.69352507591248	https://www.genecards.org/cgi-bin/carddisp.pl?gene=PSMB5
TUBB6	Tubulin Beta 6 Class V	Protein Coding	Q9BUF5	55	GC18P012307	1.69352507591248	https://www.genecards.org/cgi-bin/carddisp.pl?gene=TUBB6
NUP133	Nucleoporin 133	Protein Coding	Q8WUM0	53	GC01M230804	1.69352507591248	https://www.genecards.org/cgi-bin/carddisp.pl?gene=NUP133
PCBP2	Poly(RC) Binding Protein 2	Protein Coding	Q15366	53	GC12P053452	1.69352507591248	https://www.genecards.org/cgi-bin/carddisp.pl?gene=PCBP2
PPM1L	Protein Phosphatase, Mg2+/Mn2+ Dependent 1L	Protein Coding	Q5SGD2	47	GC03P160755	1.69352507591248	https://www.genecards.org/cgi-bin/carddisp.pl?gene=PPM1L
JAGN1	Jagunal Homolog 1	Protein Coding	Q8N5M9	46	GC03P009890	1.69352507591248	https://www.genecards.org/cgi-bin/carddisp.pl?gene=JAGN1
LARP4	La Ribonucleoprotein 4	Protein Coding	Q71RC2	46	GC12P050392	1.69352507591248	https://www.genecards.org/cgi-bin/carddisp.pl?gene=LARP4
SSR3	Signal Sequence Receptor Subunit 3	Protein Coding	Q9UNL2	46	GC03M156540	1.69352507591248	https://www.genecards.org/cgi-bin/carddisp.pl?gene=SSR3
CFAP20	Cilia And Flagella Associated Protein 20	Protein Coding	Q9Y6A4	44	GC16M058113	1.69352507591248	https://www.genecards.org/cgi-bin/carddisp.pl?gene=CFAP20
APOE	Apolipoprotein E	Protein Coding	P02649	62	GC19P162261	1.68806171417236	https://www.genecards.org/cgi-bin/carddisp.pl?gene=APOE
IGF1	Insulin Like Growth Factor 1	Protein Coding	P05019	60	GC12M102395	1.68806171417236	https://www.genecards.org/cgi-bin/carddisp.pl?gene=IGF1
BID	BH3 Interacting Domain Death Agonist	Protein Coding	P55957	57	GC22M017734	1.68806171417236	https://www.genecards.org/cgi-bin/carddisp.pl?gene=BID
IL10	Interleukin 10	Protein Coding	P22301	59	GC01M206767	1.66778874397278	https://www.genecards.org/cgi-bin/carddisp.pl?gene=IL10
LMAN1	Lectin, Mannose Binding 1	Protein Coding	P49257	57	GC18M059327	1.66778874397278	https://www.genecards.org/cgi-bin/carddisp.pl?gene=LMAN1
GADD45A	Growth Arrest And DNA Damage Inducible Alpha	Protein Coding	P24522	56	GC01P067685	1.66778874397278	https://www.genecards.org/cgi-bin/carddisp.pl?gene=GADD45A
BAG6	BAG Cochaperone 6	Protein Coding	P46379	50	GC06M031639	1.66778874397278	https://www.genecards.org/cgi-bin/carddisp.pl?gene=BAG6
DNM1L	Dynamin 1 Like	Protein Coding	O00429	60	GC12P032679	1.65531599521637	https://www.genecards.org/cgi-bin/carddisp.pl?gene=DNM1L
TXNRD1	Thioredoxin Reductase 1	Protein Coding	Q16881	58	GC12P104215	1.65531599521637	https://www.genecards.org/cgi-bin/carddisp.pl?gene=TXNRD1
USP13	Ubiquitin Specific Peptidase 13	Protein Coding	Q92995	53	GC03P179654	1.65531599521637	https://www.genecards.org/cgi-bin/carddisp.pl?gene=USP13
SHQ1	SHQ1, H/ACA Ribonucleoprotein Assembly Factor	Protein Coding	Q6PI26	48	GC03M072725	1.65531599521637	https://www.genecards.org/cgi-bin/carddisp.pl?gene=SHQ1
MIR214	MicroRNA 214	RNA Gene		31	GC01M172234	1.65531599521637	https://www.genecards.org/cgi-bin/carddisp.pl?gene=MIR214
BRAF	B-Raf Proto-Oncogene, Serine/Threonine Kinase	Protein Coding	P15056	67	GC07M140798	1.64697504043579	https://www.genecards.org/cgi-bin/carddisp.pl?gene=BRAF
RIPK1	Receptor Interacting Serine/Threonine Kinase 1	Protein Coding	Q13546	63	GC06P010244	1.64697504043579	https://www.genecards.org/cgi-bin/carddisp.pl?gene=RIPK1
PCSK9	Proprotein Convertase Subtilisin/Kexin Type 9	Protein Coding	Q8NBP7	62	GC01P055039	1.64697504043579	https://www.genecards.org/cgi-bin/carddisp.pl?gene=PCSK9
PPARD	Peroxisome Proliferator Activated Receptor Delta	Protein Coding	Q03181	60	GC06P190816	1.64697504043579	https://www.genecards.org/cgi-bin/carddisp.pl?gene=PPARD
HLA-B	Major Histocompatibility Complex, Class I, B	Protein Coding	P01889	59	GC06M111465	1.64697504043579	https://www.genecards.org/cgi-bin/carddisp.pl?gene=HLA-B
STUB1	STIP1 Homology And U-Box Containing Protein 1	Protein Coding	Q9UNE7	57	GC16P128002	1.64697504043579	https://www.genecards.org/cgi-bin/carddisp.pl?gene=STUB1
CDKN1A	Cyclin Dependent Kinase Inhibitor 1A	Protein Coding	P38936	63	GC06P190835	1.62557458877563	https://www.genecards.org/cgi-bin/carddisp.pl?gene=CDKN1A
ABCG2	ATP Binding Cassette Subfamily G Member 2 (JR Blood Group)	Protein Coding	Q9UNQ0	62	GC04M088090	1.62557458877563	https://www.genecards.org/cgi-bin/carddisp.pl?gene=ABCG2
PRMT1	Protein Arginine Methyltransferase 1	Protein Coding	Q99873	62	GC19P049675	1.62557458877563	https://www.genecards.org/cgi-bin/carddisp.pl?gene=PRMT1
EGR1	Early Growth Response 1	Protein Coding	P18146	58	GC05P138465	1.62557458877563	https://www.genecards.org/cgi-bin/carddisp.pl?gene=EGR1
HAMP	Hepcidin Antimicrobial Peptide	Protein Coding	P81172	56	GC19P161950	1.62557458877563	https://www.genecards.org/cgi-bin/carddisp.pl?gene=HAMP
UBC	Ubiquitin C	Protein Coding	P0CG48	56	GC12M124911	1.62557458877563	https://www.genecards.org/cgi-bin/carddisp.pl?gene=UBC
NCK1	NCK Adaptor Protein 1	Protein Coding	P16333	55	GC03P136862	1.62557458877563	https://www.genecards.org/cgi-bin/carddisp.pl?gene=NCK1
SNHG12	Small Nucleolar RNA Host Gene 12	RNA Gene	Q9BXW3	33	GC01M037333	1.62557458877563	https://www.genecards.org/cgi-bin/carddisp.pl?gene=SNHG12
RPS6KA1	Ribosomal Protein S6 Kinase A1	Protein Coding	Q15418	63	GC01P084399	1.61305260658264	https://www.genecards.org/cgi-bin/carddisp.pl?gene=RPS6KA1
ATP1B1	ATPase Na+/K+ Transporting Subunit Beta 1	Protein Coding	P05026	61	GC01P169105	1.61305260658264	https://www.genecards.org/cgi-bin/carddisp.pl?gene=ATP1B1
SOX2	SRY-Box Transcription Factor 2	Protein Coding	P48431	58	GC03P181711	1.61305260658264	https://www.genecards.org/cgi-bin/carddisp.pl?gene=SOX2
SKP2	S-Phase Kinase Associated Protein 2	Protein Coding	Q13309	57	GC05P036151	1.61305260658264	https://www.genecards.org/cgi-bin/carddisp.pl?gene=SKP2
SOCS3	Suppressor Of Cytokine Signaling 3	Protein Coding	O14543	57	GC17M078356	1.61305260658264	https://www.genecards.org/cgi-bin/carddisp.pl?gene=SOCS3
ATP2C1	ATPase Secretory Pathway Ca2+ Transporting 1	Protein Coding	P98194	55	GC03P130850	1.61305260658264	https://www.genecards.org/cgi-bin/carddisp.pl?gene=ATP2C1
SEC13	SEC13 Homolog, Nuclear Pore And COPII Coat Complex Component	Protein Coding	P55735	54	GC03M010293	1.61305260658264	https://www.genecards.org/cgi-bin/carddisp.pl?gene=SEC13
CALHM1	Calcium Homeostasis Modulator 1	Protein Coding	Q8IU99	47	GC10M103454	1.61305260658264	https://www.genecards.org/cgi-bin/carddisp.pl?gene=CALHM1
TMEM39A	Transmembrane Protein 39A	Protein Coding	Q9NV64	42	GC03M119428	1.61305260658264	https://www.genecards.org/cgi-bin/carddisp.pl?gene=TMEM39A
TMEM39B	Transmembrane Protein 39B	Protein Coding	Q9GZU3	37	GC01P084727	1.61305260658264	https://www.genecards.org/cgi-bin/carddisp.pl?gene=TMEM39B
TLR7	Toll Like Receptor 7	Protein Coding	Q9NYK1	60	GC0XP012867	1.60353493690491	https://www.genecards.org/cgi-bin/carddisp.pl?gene=TLR7
BAK1	BCL2 Antagonist/Killer 1	Protein Coding	Q16611	57	GC06M033572	1.60353493690491	https://www.genecards.org/cgi-bin/carddisp.pl?gene=BAK1
SMURF1	SMAD Specific E3 Ubiquitin Protein Ligase 1	Protein Coding	Q9HCE7	56	GC07M099027	1.60353493690491	https://www.genecards.org/cgi-bin/carddisp.pl?gene=SMURF1
ACSL3	Acyl-CoA Synthetase Long Chain Family Member 3	Protein Coding	O95573	54	GC02P222860	1.60353493690491	https://www.genecards.org/cgi-bin/carddisp.pl?gene=ACSL3
PMAIP1	Phorbol-12-Myristate-13-Acetate-Induced Protein 1	Protein Coding	Q13794	52	GC18P059899	1.60353493690491	https://www.genecards.org/cgi-bin/carddisp.pl?gene=PMAIP1
MIR346	MicroRNA 346	RNA Gene		27	GC10M086264	1.60353493690491	https://www.genecards.org/cgi-bin/carddisp.pl?gene=MIR346
LINC02605	Long Intergenic Non-Protein Coding RNA 2605	RNA Gene		21	GC08P078838	1.60353493690491	https://www.genecards.org/cgi-bin/carddisp.pl?gene=LINC02605
VCAM1	Vascular Cell Adhesion Molecule 1	Protein Coding	P19320	59	GC01P100719	1.58079504966736	https://www.genecards.org/cgi-bin/carddisp.pl?gene=VCAM1
ERP44	Endoplasmic Reticulum Protein 44	Protein Coding	Q9BS26	52	GC09M099979	1.58079504966736	https://www.genecards.org/cgi-bin/carddisp.pl?gene=ERP44
MSRB3	Methionine Sulfoxide Reductase B3	Protein Coding	Q8IXL7	52	GC12P081895	1.58079504966736	https://www.genecards.org/cgi-bin/carddisp.pl?gene=MSRB3
PHLDA1	Pleckstrin Homology Like Domain Family A Member 1	Protein Coding	Q8WV24	46	GC12M076025	1.58079504966736	https://www.genecards.org/cgi-bin/carddisp.pl?gene=PHLDA1
PWAR1	Prader Willi/Angelman Region RNA 1	RNA Gene		22	GC15P025135	1.58079504966736	https://www.genecards.org/cgi-bin/carddisp.pl?gene=PWAR1
TRV-AAC1-4	TRNA-Val (Anticodon AAC) 1-4	RNA Gene		8	GC05M181218	1.58079504966736	https://www.genecards.org/cgi-bin/carddisp.pl?gene=TRV-AAC1-4
MAFK	MAF BZIP Transcription Factor K	Protein Coding	O60675	46	GC07P021514	1.57016098499298	https://www.genecards.org/cgi-bin/carddisp.pl?gene=MAFK
FAS	Fas Cell Surface Death Receptor	Protein Coding	P25445	63	GC10P128620	1.56508159637451	https://www.genecards.org/cgi-bin/carddisp.pl?gene=FAS
AIFM1	Apoptosis Inducing Factor Mitochondria Associated 1	Protein Coding	O95831	63	GC0XM130129	1.55728375911713	https://www.genecards.org/cgi-bin/carddisp.pl?gene=AIFM1
SRC	SRC Proto-Oncogene, Non-Receptor Tyrosine Kinase	Protein Coding	P12931	63	GC20P037344	1.55728375911713	https://www.genecards.org/cgi-bin/carddisp.pl?gene=SRC
LRRK2	Leucine Rich Repeat Kinase 2	Protein Coding	Q5S007	62	GC12P040196	1.55728375911713	https://www.genecards.org/cgi-bin/carddisp.pl?gene=LRRK2
RAC1	Rac Family Small GTPase 1	Protein Coding	P63000	62	GC07P021715	1.55728375911713	https://www.genecards.org/cgi-bin/carddisp.pl?gene=RAC1
GANAB	Glucosidase II Alpha Subunit	Protein Coding	Q14697	59	GC11M142861	1.55728375911713	https://www.genecards.org/cgi-bin/carddisp.pl?gene=GANAB
HTRA2	HtrA Serine Peptidase 2	Protein Coding	O43464	59	GC02P074529	1.55728375911713	https://www.genecards.org/cgi-bin/carddisp.pl?gene=HTRA2
TXN	Thioredoxin	Protein Coding	P10599	59	GC09M110243	1.55728375911713	https://www.genecards.org/cgi-bin/carddisp.pl?gene=TXN
SND1	Staphylococcal Nuclease And Tudor Domain Containing 1	Protein Coding	Q7KZF4	50	GC07P127652	1.55728375911713	https://www.genecards.org/cgi-bin/carddisp.pl?gene=SND1
HNF4A	Hepatocyte Nuclear Factor 4 Alpha	Protein Coding	P41235	62	GC20P044355	1.53291666507721	https://www.genecards.org/cgi-bin/carddisp.pl?gene=HNF4A
USP7	Ubiquitin Specific Peptidase 7	Protein Coding	Q93009	62	GC16M008892	1.53291666507721	https://www.genecards.org/cgi-bin/carddisp.pl?gene=USP7
PRKAB1	Protein Kinase AMP-Activated Non-Catalytic Subunit Beta 1	Protein Coding	Q9Y478	60	GC12P119667	1.53291666507721	https://www.genecards.org/cgi-bin/carddisp.pl?gene=PRKAB1
BBS4	Bardet-Biedl Syndrome 4	Protein Coding	Q96RK4	53	GC15P072686	1.53291666507721	https://www.genecards.org/cgi-bin/carddisp.pl?gene=BBS4
MATN3	Matrilin 3	Protein Coding	O15232	53	GC02M019992	1.53291666507721	https://www.genecards.org/cgi-bin/carddisp.pl?gene=MATN3
YIPF5	Yip1 Domain Family Member 5	Protein Coding	Q969M3	50	GC05M144158	1.53291666507721	https://www.genecards.org/cgi-bin/carddisp.pl?gene=YIPF5
LOC126805877	MED14-Independent Group 3 Enhancer GRCh37_chr1:156099693-156100892	Functional Element		11	GC01P180104	1.50817906856537	https://www.genecards.org/cgi-bin/carddisp.pl?gene=LOC126805877
HSPB1	Heat Shock Protein Family B (Small) Member 1	Protein Coding	P04792	65	GC07P076302	1.50759279727936	https://www.genecards.org/cgi-bin/carddisp.pl?gene=HSPB1
MAPT	Microtubule Associated Protein Tau	Protein Coding	P10636	62	GC17P045894	1.50759279727936	https://www.genecards.org/cgi-bin/carddisp.pl?gene=MAPT
NOS3	Nitric Oxide Synthase 3	Protein Coding	P29474	62	GC07P168341	1.50759279727936	https://www.genecards.org/cgi-bin/carddisp.pl?gene=NOS3
EEF2K	Eukaryotic Elongation Factor 2 Kinase	Protein Coding	O00418	60	GC16P128580	1.50759279727936	https://www.genecards.org/cgi-bin/carddisp.pl?gene=EEF2K
FOXA2	Forkhead Box A2	Protein Coding	Q9Y261	60	GC20M022581	1.50759279727936	https://www.genecards.org/cgi-bin/carddisp.pl?gene=FOXA2
KLF4	KLF Transcription Factor 4	Protein Coding	O43474	60	GC09M107484	1.50759279727936	https://www.genecards.org/cgi-bin/carddisp.pl?gene=KLF4
PRSS1	Serine Protease 1	Protein Coding	P07477	57	GC07P168180	1.50759279727936	https://www.genecards.org/cgi-bin/carddisp.pl?gene=PRSS1
NUCB1	Nucleobindin 1	Protein Coding	Q02818	53	GC19P048900	1.50759279727936	https://www.genecards.org/cgi-bin/carddisp.pl?gene=NUCB1
RNF5	Ring Finger Protein 5	Protein Coding	Q99942	52	GC06P190733	1.50759279727936	https://www.genecards.org/cgi-bin/carddisp.pl?gene=RNF5
SLC38A2	Solute Carrier Family 38 Member 2	Protein Coding	Q96QD8	52	GC12M046358	1.50759279727936	https://www.genecards.org/cgi-bin/carddisp.pl?gene=SLC38A2
ZC3H12A	Zinc Finger CCCH-Type Containing 12A	Protein Coding	Q5D1E8	50	GC01P037474	1.50759279727936	https://www.genecards.org/cgi-bin/carddisp.pl?gene=ZC3H12A
OSBPL8	Oxysterol Binding Protein Like 8	Protein Coding	Q9BZF1	49	GC12M076354	1.50759279727936	https://www.genecards.org/cgi-bin/carddisp.pl?gene=OSBPL8
SDF2L1	Stromal Cell Derived Factor 2 Like 1	Protein Coding	Q9HCN8	46	GC22P096859	1.50759279727936	https://www.genecards.org/cgi-bin/carddisp.pl?gene=SDF2L1
MIR27A	MicroRNA 27a	RNA Gene		31	GC19M112017	1.50759279727936	https://www.genecards.org/cgi-bin/carddisp.pl?gene=MIR27A
LOC107832851	SIRT1 Promoter Region	Functional Element		2	GC10P067881	1.50759279727936	https://www.genecards.org/cgi-bin/carddisp.pl?gene=LOC107832851
KAT5	Lysine Acetyltransferase 5	Protein Coding	Q92993	63	GC11P065711	1.48118996620178	https://www.genecards.org/cgi-bin/carddisp.pl?gene=KAT5
TLR8	Toll Like Receptor 8	Protein Coding	Q9NR97	62	GC0XP012924	1.48118996620178	https://www.genecards.org/cgi-bin/carddisp.pl?gene=TLR8
CDK1	Cyclin Dependent Kinase 1	Protein Coding	P06493	60	GC10P060772	1.48118996620178	https://www.genecards.org/cgi-bin/carddisp.pl?gene=CDK1
PSMA6	Proteasome 20S Subunit Alpha 6	Protein Coding	P60900	59	GC14P035278	1.48118996620178	https://www.genecards.org/cgi-bin/carddisp.pl?gene=PSMA6
VDAC1	Voltage Dependent Anion Channel 1	Protein Coding	P21796	59	GC05M133975	1.48118996620178	https://www.genecards.org/cgi-bin/carddisp.pl?gene=VDAC1
DDIT4	DNA Damage Inducible Transcript 4	Protein Coding	Q9NX09	56	GC10P072273	1.48118996620178	https://www.genecards.org/cgi-bin/carddisp.pl?gene=DDIT4
UBE2D3	Ubiquitin Conjugating Enzyme E2 D3	Protein Coding	P61077	56	GC04M102794	1.48118996620178	https://www.genecards.org/cgi-bin/carddisp.pl?gene=UBE2D3
ELOC	Elongin C	Protein Coding	Q15369	54	GC08M073939	1.48118996620178	https://www.genecards.org/cgi-bin/carddisp.pl?gene=ELOC
SRP54	Signal Recognition Particle 54	Protein Coding	P61011	54	GC14P034981	1.48118996620178	https://www.genecards.org/cgi-bin/carddisp.pl?gene=SRP54
COPG1	COPI Coat Complex Subunit Gamma 1	Protein Coding	Q9Y678	53	GC03P129249	1.48118996620178	https://www.genecards.org/cgi-bin/carddisp.pl?gene=COPG1
RTN3	Reticulon 3	Protein Coding	O95197	53	GC11P114892	1.48118996620178	https://www.genecards.org/cgi-bin/carddisp.pl?gene=RTN3
KDELR1	KDEL Endoplasmic Reticulum Protein Retention Receptor 1	Protein Coding	P24390	51	GC19M048382	1.48118996620178	https://www.genecards.org/cgi-bin/carddisp.pl?gene=KDELR1
TXNDC5	Thioredoxin Domain Containing 5	Protein Coding	Q8NBS9	48	GC06M007893	1.48118996620178	https://www.genecards.org/cgi-bin/carddisp.pl?gene=TXNDC5
CCDC47	Coiled-Coil Domain Containing 47	Protein Coding	Q96A33	46	GC17M063745	1.48118996620178	https://www.genecards.org/cgi-bin/carddisp.pl?gene=CCDC47
REEP5	Receptor Accessory Protein 5	Protein Coding	Q00765	51	GC05M112876	1.47115778923035	https://www.genecards.org/cgi-bin/carddisp.pl?gene=REEP5
ATM	ATM Serine/Threonine Kinase	Protein Coding	Q13315	66	GC11P108222	1.45355713367462	https://www.genecards.org/cgi-bin/carddisp.pl?gene=ATM
GSTP1	Glutathione S-Transferase Pi 1	Protein Coding	P09211	63	GC11P067583	1.45355713367462	https://www.genecards.org/cgi-bin/carddisp.pl?gene=GSTP1
ALB	Albumin	Protein Coding	P02768	61	GC04P073397	1.45355713367462	https://www.genecards.org/cgi-bin/carddisp.pl?gene=ALB
MUC1	Mucin 1, Cell Surface Associated	Protein Coding	P15941	61	GC01M155185	1.45355713367462	https://www.genecards.org/cgi-bin/carddisp.pl?gene=MUC1
BRD4	Bromodomain Containing 4	Protein Coding	O60885	60	GC19M112059	1.45355713367462	https://www.genecards.org/cgi-bin/carddisp.pl?gene=BRD4
NPHS1	NPHS1 Adhesion Molecule, Nephrin	Protein Coding	O60500	60	GC19M035825	1.45355713367462	https://www.genecards.org/cgi-bin/carddisp.pl?gene=NPHS1
TTR	Transthyretin	Protein Coding	P02766	60	GC18P031557	1.45355713367462	https://www.genecards.org/cgi-bin/carddisp.pl?gene=TTR
A2M	Alpha-2-Macroglobulin	Protein Coding	P01023	59	GC12M009067	1.45355713367462	https://www.genecards.org/cgi-bin/carddisp.pl?gene=A2M
CUL1	Cullin 1	Protein Coding	Q13616	59	GC07P148697	1.45355713367462	https://www.genecards.org/cgi-bin/carddisp.pl?gene=CUL1
PHB1	Prohibitin 1	Protein Coding	P35232	58	GC17M101321	1.45355713367462	https://www.genecards.org/cgi-bin/carddisp.pl?gene=PHB1
CDA	Cytidine Deaminase	Protein Coding	P32320	56	GC01P083845	1.45355713367462	https://www.genecards.org/cgi-bin/carddisp.pl?gene=CDA
CCT2	Chaperonin Containing TCP1 Subunit 2	Protein Coding	P78371	54	GC12P069585	1.45355713367462	https://www.genecards.org/cgi-bin/carddisp.pl?gene=CCT2
UBE2G2	Ubiquitin Conjugating Enzyme E2 G2	Protein Coding	P60604	53	GC21M044768	1.45355713367462	https://www.genecards.org/cgi-bin/carddisp.pl?gene=UBE2G2
DNAJA2	DnaJ Heat Shock Protein Family (Hsp40) Member A2	Protein Coding	O60884	51	GC16M046955	1.45355713367462	https://www.genecards.org/cgi-bin/carddisp.pl?gene=DNAJA2
IL6	Interleukin 6	Protein Coding	P05231	63	GC07P022725	1.42450451850891	https://www.genecards.org/cgi-bin/carddisp.pl?gene=IL6
AGT	Angiotensinogen	Protein Coding	P01019	62	GC01M230690	1.42450451850891	https://www.genecards.org/cgi-bin/carddisp.pl?gene=AGT
BDNF	Brain Derived Neurotrophic Factor	Protein Coding	P23560	62	GC11M027654	1.42450451850891	https://www.genecards.org/cgi-bin/carddisp.pl?gene=BDNF
FLNA	Filamin A	Protein Coding	P21333	62	GC0XM154348	1.42450451850891	https://www.genecards.org/cgi-bin/carddisp.pl?gene=FLNA
PRDX1	Peroxiredoxin 1	Protein Coding	Q06830	62	GC01M045943	1.42450451850891	https://www.genecards.org/cgi-bin/carddisp.pl?gene=PRDX1
SPARC	Secreted Protein Acidic And Cysteine Rich	Protein Coding	P09486	62	GC05M151661	1.42450451850891	https://www.genecards.org/cgi-bin/carddisp.pl?gene=SPARC
YWHAZ	Tyrosine 3-Monooxygenase/Tryptophan 5-Monooxygenase Activation Protein Zeta	Protein Coding	P63104	61	GC08M100991	1.42450451850891	https://www.genecards.org/cgi-bin/carddisp.pl?gene=YWHAZ
HSF1	Heat Shock Transcription Factor 1	Protein Coding	Q00613	60	GC08P144291	1.42450451850891	https://www.genecards.org/cgi-bin/carddisp.pl?gene=HSF1
SIRT3	Sirtuin 3	Protein Coding	Q9NTG7	60	GC11M000215	1.42450451850891	https://www.genecards.org/cgi-bin/carddisp.pl?gene=SIRT3
AKR1A1	Aldo-Keto Reductase Family 1 Member A1	Protein Coding	P14550	56	GC01P045550	1.42450451850891	https://www.genecards.org/cgi-bin/carddisp.pl?gene=AKR1A1
PSMA1	Proteasome 20S Subunit Alpha 1	Protein Coding	P25786	56	GC11M016237	1.42450451850891	https://www.genecards.org/cgi-bin/carddisp.pl?gene=PSMA1
NOL3	Nucleolar Protein 3	Protein Coding	O60936	54	GC16P129730	1.42450451850891	https://www.genecards.org/cgi-bin/carddisp.pl?gene=NOL3
TNFAIP6	TNF Alpha Induced Protein 6	Protein Coding	P98066	54	GC02P151357	1.42450451850891	https://www.genecards.org/cgi-bin/carddisp.pl?gene=TNFAIP6
EEF1G	Eukaryotic Translation Elongation Factor 1 Gamma	Protein Coding	P26641	51	GC11M142852	1.42450451850891	https://www.genecards.org/cgi-bin/carddisp.pl?gene=EEF1G
WLS	Wnt Ligand Secretion Mediator	Protein Coding	Q5T9L3	51	GC01M068098	1.42450451850891	https://www.genecards.org/cgi-bin/carddisp.pl?gene=WLS
CEMIP2	Cell Migration Inducing Hyaluronidase 2	Protein Coding	Q9UHN6	47	GC09M072315	1.42450451850891	https://www.genecards.org/cgi-bin/carddisp.pl?gene=CEMIP2
FBXO6	F-Box Protein 6	Protein Coding	Q9NRD1	46	GC01P011664	1.42450451850891	https://www.genecards.org/cgi-bin/carddisp.pl?gene=FBXO6
SHISA5	Shisa Family Member 5	Protein Coding	Q8N114	46	GC03M048468	1.42450451850891	https://www.genecards.org/cgi-bin/carddisp.pl?gene=SHISA5
TMX1	Thioredoxin Related Transmembrane Protein 1	Protein Coding	Q9H3N1	44	GC14P051240	1.42450451850891	https://www.genecards.org/cgi-bin/carddisp.pl?gene=TMX1
HDAC6	Histone Deacetylase 6	Protein Coding	Q9UBN7	66	GC0XP048801	1.39378774166107	https://www.genecards.org/cgi-bin/carddisp.pl?gene=HDAC6
SLC2A1	Solute Carrier Family 2 Member 1	Protein Coding	P11166	66	GC01M042925	1.39378774166107	https://www.genecards.org/cgi-bin/carddisp.pl?gene=SLC2A1
CAT	Catalase	Protein Coding	P04040	64	GC11P034460	1.39378774166107	https://www.genecards.org/cgi-bin/carddisp.pl?gene=CAT
PGK1	Phosphoglycerate Kinase 1	Protein Coding	P00558	62	GC0XP078278	1.39378774166107	https://www.genecards.org/cgi-bin/carddisp.pl?gene=PGK1
VDR	Vitamin D Receptor	Protein Coding	P11473	62	GC12M047841	1.39378774166107	https://www.genecards.org/cgi-bin/carddisp.pl?gene=VDR
HSPD1	Heat Shock Protein Family D (Hsp60) Member 1	Protein Coding	P10809	61	GC02M197486	1.39378774166107	https://www.genecards.org/cgi-bin/carddisp.pl?gene=HSPD1
KL	Klotho	Protein Coding	Q9UEF7	60	GC13P033016	1.39378774166107	https://www.genecards.org/cgi-bin/carddisp.pl?gene=KL
MDH2	Malate Dehydrogenase 2	Protein Coding	P40926	60	GC07P076048	1.39378774166107	https://www.genecards.org/cgi-bin/carddisp.pl?gene=MDH2
TRPV6	Transient Receptor Potential Cation Channel Subfamily V Member 6	Protein Coding	Q9H1D0	60	GC07M142871	1.39378774166107	https://www.genecards.org/cgi-bin/carddisp.pl?gene=TRPV6
GFPT1	Glutamine--Fructose-6-Phosphate Transaminase 1	Protein Coding	Q06210	59	GC02M069319	1.39378774166107	https://www.genecards.org/cgi-bin/carddisp.pl?gene=GFPT1
GPI	Glucose-6-Phosphate Isomerase	Protein Coding	P06744	59	GC19P034359	1.39378774166107	https://www.genecards.org/cgi-bin/carddisp.pl?gene=GPI
PLK4	Polo Like Kinase 4	Protein Coding	O00444	59	GC04P127880	1.39378774166107	https://www.genecards.org/cgi-bin/carddisp.pl?gene=PLK4
WWOX	WW Domain Containing Oxidoreductase	Protein Coding	Q9NZC7	59	GC16P078099	1.39378774166107	https://www.genecards.org/cgi-bin/carddisp.pl?gene=WWOX
PSMA3	Proteasome 20S Subunit Alpha 3	Protein Coding	P25788	58	GC14P058244	1.39378774166107	https://www.genecards.org/cgi-bin/carddisp.pl?gene=PSMA3
EIF2S3	Eukaryotic Translation Initiation Factor 2 Subunit Gamma	Protein Coding	P41091	57	GC0XP024054	1.39378774166107	https://www.genecards.org/cgi-bin/carddisp.pl?gene=EIF2S3
HMGA2	High Mobility Group AT-Hook 2	Protein Coding	P52926	57	GC12P065824	1.39378774166107	https://www.genecards.org/cgi-bin/carddisp.pl?gene=HMGA2
HTRA1	HtrA Serine Peptidase 1	Protein Coding	Q92743	57	GC10P129704	1.39378774166107	https://www.genecards.org/cgi-bin/carddisp.pl?gene=HTRA1
PSMA7	Proteasome 20S Subunit Alpha 7	Protein Coding	O14818	57	GC20M062136	1.39378774166107	https://www.genecards.org/cgi-bin/carddisp.pl?gene=PSMA7
SPP1	Secreted Phosphoprotein 1	Protein Coding	P10451	57	GC04P087975	1.39378774166107	https://www.genecards.org/cgi-bin/carddisp.pl?gene=SPP1
TNFRSF10A	TNF Receptor Superfamily Member 10a	Protein Coding	O00220	57	GC08M023190	1.39378774166107	https://www.genecards.org/cgi-bin/carddisp.pl?gene=TNFRSF10A
AARS1	Alanyl-TRNA Synthetase 1	Protein Coding	P49588	56	GC16M076160	1.39378774166107	https://www.genecards.org/cgi-bin/carddisp.pl?gene=AARS1
BAG1	BAG Cochaperone 1	Protein Coding	Q99933	56	GC09M033245	1.39378774166107	https://www.genecards.org/cgi-bin/carddisp.pl?gene=BAG1
SPOP	Speckle Type BTB/POZ Protein	Protein Coding	O43791	56	GC17M049598	1.39378774166107	https://www.genecards.org/cgi-bin/carddisp.pl?gene=SPOP
ARCN1	Archain 1	Protein Coding	P48444	55	GC11P118572	1.39378774166107	https://www.genecards.org/cgi-bin/carddisp.pl?gene=ARCN1
SSB	Small RNA Binding Exonuclease Protection Factor La	Protein Coding	P05455	55	GC02P169791	1.39378774166107	https://www.genecards.org/cgi-bin/carddisp.pl?gene=SSB
UBQLN2	Ubiquilin 2	Protein Coding	Q9UHD9	54	GC0XP056563	1.39378774166107	https://www.genecards.org/cgi-bin/carddisp.pl?gene=UBQLN2
HNRNPF	Heterogeneous Nuclear Ribonucleoprotein F	Protein Coding	P52597	53	GC10M043385	1.39378774166107	https://www.genecards.org/cgi-bin/carddisp.pl?gene=HNRNPF
PRDX4	Peroxiredoxin 4	Protein Coding	Q13162	53	GC0XP023665	1.39378774166107	https://www.genecards.org/cgi-bin/carddisp.pl?gene=PRDX4
RCN1	Reticulocalbin 1	Protein Coding	Q15293	53	GC11P032090	1.39378774166107	https://www.genecards.org/cgi-bin/carddisp.pl?gene=RCN1
CCT8	Chaperonin Containing TCP1 Subunit 8	Protein Coding	P50990	52	GC21M029055	1.39378774166107	https://www.genecards.org/cgi-bin/carddisp.pl?gene=CCT8
SAR1A	Secretion Associated Ras Related GTPase 1A	Protein Coding	Q9NR31	52	GC10M070147	1.39378774166107	https://www.genecards.org/cgi-bin/carddisp.pl?gene=SAR1A
CDKAL1	CDKAL1 Threonylcarbamoyladenosine TRNA Methylthiotransferase	Protein Coding	Q5VV42	51	GC06P020534	1.39378774166107	https://www.genecards.org/cgi-bin/carddisp.pl?gene=CDKAL1
WDR77	WD Repeat Domain 77	Protein Coding	Q9BQA1	51	GC01M111439	1.39378774166107	https://www.genecards.org/cgi-bin/carddisp.pl?gene=WDR77
CKAP4	Cytoskeleton Associated Protein 4	Protein Coding	Q07065	50	GC12M106237	1.39378774166107	https://www.genecards.org/cgi-bin/carddisp.pl?gene=CKAP4
EIF3M	Eukaryotic Translation Initiation Factor 3 Subunit M	Protein Coding	Q7L2H7	50	GC11P032780	1.39378774166107	https://www.genecards.org/cgi-bin/carddisp.pl?gene=EIF3M
ERGIC3	ERGIC And Golgi 3	Protein Coding	Q9Y282	48	GC20P035542	1.39378774166107	https://www.genecards.org/cgi-bin/carddisp.pl?gene=ERGIC3
HRK	Harakiri, BCL2 Interacting Protein	Protein Coding	O00198	48	GC12M116857	1.39378774166107	https://www.genecards.org/cgi-bin/carddisp.pl?gene=HRK
ENC1	Ectodermal-Neural Cortex 1	Protein Coding	O14682	47	GC05M074627	1.39378774166107	https://www.genecards.org/cgi-bin/carddisp.pl?gene=ENC1
ERLEC1	Endoplasmic Reticulum Lectin 1	Protein Coding	Q96DZ1	47	GC02P053786	1.39378774166107	https://www.genecards.org/cgi-bin/carddisp.pl?gene=ERLEC1
PDIA5	Protein Disulfide Isomerase Family A Member 5	Protein Coding	Q14554	46	GC03P123067	1.39378774166107	https://www.genecards.org/cgi-bin/carddisp.pl?gene=PDIA5
CREBZF	CREB/ATF BZIP Transcription Factor	Protein Coding	Q9NS37	44	GC11M085657	1.39378774166107	https://www.genecards.org/cgi-bin/carddisp.pl?gene=CREBZF
TRL-AAG2-3	TRNA-Leu (Anticodon AAG) 2-3	RNA Gene		11	GC14P060230	1.39378774166107	https://www.genecards.org/cgi-bin/carddisp.pl?gene=TRL-AAG2-3
STAT1	Signal Transducer And Activator Of Transcription 1	Protein Coding	P42224	65	GC02M190908	1.36108326911926	https://www.genecards.org/cgi-bin/carddisp.pl?gene=STAT1
SYK	Spleen Associated Tyrosine Kinase	Protein Coding	P43405	64	GC09P109564	1.36108326911926	https://www.genecards.org/cgi-bin/carddisp.pl?gene=SYK
ENO1	Enolase 1	Protein Coding	P06733	62	GC01M008861	1.36108326911926	https://www.genecards.org/cgi-bin/carddisp.pl?gene=ENO1
MMP1	Matrix Metallopeptidase 1	Protein Coding	P03956	62	GC11M143594	1.36108326911926	https://www.genecards.org/cgi-bin/carddisp.pl?gene=MMP1
TBK1	TANK Binding Kinase 1	Protein Coding	Q9UHD2	61	GC12P081858	1.36108326911926	https://www.genecards.org/cgi-bin/carddisp.pl?gene=TBK1
RPA1	Replication Protein A1	Protein Coding	P27694	60	GC17P001829	1.36108326911926	https://www.genecards.org/cgi-bin/carddisp.pl?gene=RPA1
CFL1	Cofilin 1	Protein Coding	P23528	59	GC11M065823	1.36108326911926	https://www.genecards.org/cgi-bin/carddisp.pl?gene=CFL1
FGF2	Fibroblast Growth Factor 2	Protein Coding	P09038	59	GC04P122826	1.36108326911926	https://www.genecards.org/cgi-bin/carddisp.pl?gene=FGF2
PTPN2	Protein Tyrosine Phosphatase Non-Receptor Type 2	Protein Coding	P17706	59	GC18M039137	1.36108326911926	https://www.genecards.org/cgi-bin/carddisp.pl?gene=PTPN2
RPSA	Ribosomal Protein SA	Protein Coding	P08865	59	GC03P039406	1.36108326911926	https://www.genecards.org/cgi-bin/carddisp.pl?gene=RPSA
BMP2	Bone Morphogenetic Protein 2	Protein Coding	P12643	58	GC20P006767	1.36108326911926	https://www.genecards.org/cgi-bin/carddisp.pl?gene=BMP2
CRBN	Cereblon	Protein Coding	Q96SW2	58	GC03M003144	1.36108326911926	https://www.genecards.org/cgi-bin/carddisp.pl?gene=CRBN
FDFT1	Farnesyl-Diphosphate Farnesyltransferase 1	Protein Coding	P37268	58	GC08P011795	1.36108326911926	https://www.genecards.org/cgi-bin/carddisp.pl?gene=FDFT1
ROCK2	Rho Associated Coiled-Coil Containing Protein Kinase 2	Protein Coding	O75116	58	GC02M011635	1.36108326911926	https://www.genecards.org/cgi-bin/carddisp.pl?gene=ROCK2
STT3A	STT3 Oligosaccharyltransferase Complex Catalytic Subunit A	Protein Coding	P46977	58	GC11P128803	1.36108326911926	https://www.genecards.org/cgi-bin/carddisp.pl?gene=STT3A
UQCRC2	Ubiquinol-Cytochrome C Reductase Core Protein 2	Protein Coding	P22695	58	GC16P128574	1.36108326911926	https://www.genecards.org/cgi-bin/carddisp.pl?gene=UQCRC2
DDB1	Damage Specific DNA Binding Protein 1	Protein Coding	Q16531	57	GC11M142811	1.36108326911926	https://www.genecards.org/cgi-bin/carddisp.pl?gene=DDB1
NCL	Nucleolin	Protein Coding	P19338	57	GC02M231453	1.36108326911926	https://www.genecards.org/cgi-bin/carddisp.pl?gene=NCL
CALU	Calumenin	Protein Coding	O43852	56	GC07P128739	1.36108326911926	https://www.genecards.org/cgi-bin/carddisp.pl?gene=CALU
CCL5	C-C Motif Chemokine Ligand 5	Protein Coding	P13501	56	GC17M035871	1.36108326911926	https://www.genecards.org/cgi-bin/carddisp.pl?gene=CCL5
KLK4	Kallikrein Related Peptidase 4	Protein Coding	Q9Y5K2	56	GC19M112900	1.36108326911926	https://www.genecards.org/cgi-bin/carddisp.pl?gene=KLK4
AHSA1	Activator Of HSP90 ATPase Activity 1	Protein Coding	O95433	55	GC14P077457	1.36108326911926	https://www.genecards.org/cgi-bin/carddisp.pl?gene=AHSA1
DAPK3	Death Associated Protein Kinase 3	Protein Coding	O43293	55	GC19M003958	1.36108326911926	https://www.genecards.org/cgi-bin/carddisp.pl?gene=DAPK3
PSMD1	Proteasome 26S Subunit, Non-ATPase 1	Protein Coding	Q99460	53	GC02P231056	1.36108326911926	https://www.genecards.org/cgi-bin/carddisp.pl?gene=PSMD1
RAP1GDS1	Rap1 GTPase-GDP Dissociation Stimulator 1	Protein Coding	P52306	53	GC04P098261	1.36108326911926	https://www.genecards.org/cgi-bin/carddisp.pl?gene=RAP1GDS1
INSIG1	Insulin Induced Gene 1	Protein Coding	O15503	51	GC07P155297	1.36108326911926	https://www.genecards.org/cgi-bin/carddisp.pl?gene=INSIG1
PACRG	Parkin Coregulated	Protein Coding	Q96M98	51	GC06P162727	1.36108326911926	https://www.genecards.org/cgi-bin/carddisp.pl?gene=PACRG
DSPP	Dentin Sialophosphoprotein	Protein Coding	Q9NZW4	50	GC04P087608	1.36108326911926	https://www.genecards.org/cgi-bin/carddisp.pl?gene=DSPP
NUCB2	Nucleobindin 2	Protein Coding	P80303	50	GC11P023500	1.36108326911926	https://www.genecards.org/cgi-bin/carddisp.pl?gene=NUCB2
EDEM2	ER Degradation Enhancing Alpha-Mannosidase Like Protein 2	Protein Coding	Q9BV94	49	GC20M035115	1.36108326911926	https://www.genecards.org/cgi-bin/carddisp.pl?gene=EDEM2
CIP2A	Cellular Inhibitor Of PP2A	Protein Coding	Q8TCG1	48	GC03M108619	1.36108326911926	https://www.genecards.org/cgi-bin/carddisp.pl?gene=CIP2A
MIR199A2	MicroRNA 199a-2	RNA Gene		28	GC01M172235	1.36108326911926	https://www.genecards.org/cgi-bin/carddisp.pl?gene=MIR199A2
LOC111255642	TNFRSF10B 5' Regulatory Region	Functional Element		2	GC08P026529	1.36108326911926	https://www.genecards.org/cgi-bin/carddisp.pl?gene=LOC111255642
DNMT1	DNA Methyltransferase 1	Protein Coding	P26358	66	GC19M010133	1.32594633102417	https://www.genecards.org/cgi-bin/carddisp.pl?gene=DNMT1
IDH1	Isocitrate Dehydrogenase (NADP(+)) 1	Protein Coding	O75874	65	GC02M208236	1.32594633102417	https://www.genecards.org/cgi-bin/carddisp.pl?gene=IDH1
PLK1	Polo Like Kinase 1	Protein Coding	P53350	65	GC16P128614	1.32594633102417	https://www.genecards.org/cgi-bin/carddisp.pl?gene=PLK1
HSP90AB1	Heat Shock Protein 90 Alpha Family Class B Member 1	Protein Coding	P08238	63	GC06P044246	1.32594633102417	https://www.genecards.org/cgi-bin/carddisp.pl?gene=HSP90AB1
ALDOA	Aldolase, Fructose-Bisphosphate A	Protein Coding	P04075	62	GC16P030064	1.32594633102417	https://www.genecards.org/cgi-bin/carddisp.pl?gene=ALDOA
CAPN1	Calpain 1	Protein Coding	P07384	62	GC11P115042	1.32594633102417	https://www.genecards.org/cgi-bin/carddisp.pl?gene=CAPN1
MAP3K7	Mitogen-Activated Protein Kinase Kinase Kinase 7	Protein Coding	O43318	62	GC06M090513	1.32594633102417	https://www.genecards.org/cgi-bin/carddisp.pl?gene=MAP3K7
ETS1	ETS Proto-Oncogene 1, Transcription Factor	Protein Coding	P14921	61	GC11M128458	1.32594633102417	https://www.genecards.org/cgi-bin/carddisp.pl?gene=ETS1
HPRT1	Hypoxanthine Phosphoribosyltransferase 1	Protein Coding	P00492	60	GC0XP134460	1.32594633102417	https://www.genecards.org/cgi-bin/carddisp.pl?gene=HPRT1
PTGER2	Prostaglandin E Receptor 2	Protein Coding	P43116	60	GC14P052314	1.32594633102417	https://www.genecards.org/cgi-bin/carddisp.pl?gene=PTGER2
SPTLC2	Serine Palmitoyltransferase Long Chain Base Subunit 2	Protein Coding	O15270	60	GC14M077505	1.32594633102417	https://www.genecards.org/cgi-bin/carddisp.pl?gene=SPTLC2
UBE2I	Ubiquitin Conjugating Enzyme E2 I	Protein Coding	P63279	60	GC16P128010	1.32594633102417	https://www.genecards.org/cgi-bin/carddisp.pl?gene=UBE2I
AK2	Adenylate Kinase 2	Protein Coding	P54819	59	GC01M033007	1.32594633102417	https://www.genecards.org/cgi-bin/carddisp.pl?gene=AK2
CLTC	Clathrin Heavy Chain	Protein Coding	Q00610	59	GC17P059619	1.32594633102417	https://www.genecards.org/cgi-bin/carddisp.pl?gene=CLTC
CSK	C-Terminal Src Kinase	Protein Coding	P41240	59	GC15P074782	1.32594633102417	https://www.genecards.org/cgi-bin/carddisp.pl?gene=CSK
FEN1	Flap Structure-Specific Endonuclease 1	Protein Coding	P39748	59	GC11P114768	1.32594633102417	https://www.genecards.org/cgi-bin/carddisp.pl?gene=FEN1
GSTO1	Glutathione S-Transferase Omega 1	Protein Coding	P78417	59	GC10P104235	1.32594633102417	https://www.genecards.org/cgi-bin/carddisp.pl?gene=GSTO1
HADHB	Hydroxyacyl-CoA Dehydrogenase Trifunctional Multienzyme Complex Subunit Beta	Protein Coding	P55084	59	GC02P026243	1.32594633102417	https://www.genecards.org/cgi-bin/carddisp.pl?gene=HADHB
HSD17B10	Hydroxysteroid 17-Beta Dehydrogenase 10	Protein Coding	Q99714	59	GC0XM053431	1.32594633102417	https://www.genecards.org/cgi-bin/carddisp.pl?gene=HSD17B10
HSD17B4	Hydroxysteroid 17-Beta Dehydrogenase 4	Protein Coding	P51659	59	GC05P119452	1.32594633102417	https://www.genecards.org/cgi-bin/carddisp.pl?gene=HSD17B4
MCM7	Minichromosome Maintenance Complex Component 7	Protein Coding	P33993	59	GC07M100092	1.32594633102417	https://www.genecards.org/cgi-bin/carddisp.pl?gene=MCM7
TPI1	Triosephosphate Isomerase 1	Protein Coding	P60174	59	GC12P006867	1.32594633102417	https://www.genecards.org/cgi-bin/carddisp.pl?gene=TPI1
USP15	Ubiquitin Specific Peptidase 15	Protein Coding	Q9Y4E8	59	GC12P062260	1.32594633102417	https://www.genecards.org/cgi-bin/carddisp.pl?gene=USP15
CLEC7A	C-Type Lectin Domain Containing 7A	Protein Coding	Q9BXN2	58	GC12M037043	1.32594633102417	https://www.genecards.org/cgi-bin/carddisp.pl?gene=CLEC7A
CKB	Creatine Kinase B	Protein Coding	P12277	57	GC14M103519	1.32594633102417	https://www.genecards.org/cgi-bin/carddisp.pl?gene=CKB
PSMC3	Proteasome 26S Subunit, ATPase 3	Protein Coding	P17980	57	GC11M142657	1.32594633102417	https://www.genecards.org/cgi-bin/carddisp.pl?gene=PSMC3
EIF5A	Eukaryotic Translation Initiation Factor 5A	Protein Coding	P63241	56	GC17P007306	1.32594633102417	https://www.genecards.org/cgi-bin/carddisp.pl?gene=EIF5A
KHK	Ketohexokinase	Protein Coding	P50053	56	GC02P027086	1.32594633102417	https://www.genecards.org/cgi-bin/carddisp.pl?gene=KHK
MAPRE1	Microtubule Associated Protein RP/EB Family Member 1	Protein Coding	Q15691	56	GC20P032819	1.32594633102417	https://www.genecards.org/cgi-bin/carddisp.pl?gene=MAPRE1
CCL20	C-C Motif Chemokine Ligand 20	Protein Coding	P78556	55	GC02P227846	1.32594633102417	https://www.genecards.org/cgi-bin/carddisp.pl?gene=CCL20
FLII	FLII Actin Remodeling Protein	Protein Coding	Q13045	55	GC17M018244	1.32594633102417	https://www.genecards.org/cgi-bin/carddisp.pl?gene=FLII
MDH1	Malate Dehydrogenase 1	Protein Coding	P40925	55	GC02P063557	1.32594633102417	https://www.genecards.org/cgi-bin/carddisp.pl?gene=MDH1
NUDC	Nuclear Distribution C, Dynein Complex Regulator	Protein Coding	Q9Y266	55	GC01P084440	1.32594633102417	https://www.genecards.org/cgi-bin/carddisp.pl?gene=NUDC
PAICS	Phosphoribosylaminoimidazole Carboxylase And Phosphoribosylaminoimidazolesuccinocarboxamide Synthase	Protein Coding	P22234	55	GC04P056435	1.32594633102417	https://www.genecards.org/cgi-bin/carddisp.pl?gene=PAICS
PGAM1	Phosphoglycerate Mutase 1	Protein Coding	P18669	55	GC10P097426	1.32594633102417	https://www.genecards.org/cgi-bin/carddisp.pl?gene=PGAM1
ANXA7	Annexin A7	Protein Coding	P20073	54	GC10M073375	1.32594633102417	https://www.genecards.org/cgi-bin/carddisp.pl?gene=ANXA7
PLS3	Plastin 3	Protein Coding	P13797	54	GC0XP115560	1.32594633102417	https://www.genecards.org/cgi-bin/carddisp.pl?gene=PLS3
RANGAP1	Ran GTPase Activating Protein 1	Protein Coding	P46060	54	GC22M041244	1.32594633102417	https://www.genecards.org/cgi-bin/carddisp.pl?gene=RANGAP1
SUCLG2	Succinate-CoA Ligase GDP-Forming Subunit Beta	Protein Coding	Q96I99	54	GC03M067358	1.32594633102417	https://www.genecards.org/cgi-bin/carddisp.pl?gene=SUCLG2
BST2	Bone Marrow Stromal Cell Antigen 2	Protein Coding	Q10589	53	GC19M112136	1.32594633102417	https://www.genecards.org/cgi-bin/carddisp.pl?gene=BST2
CRTC2	CREB Regulated Transcription Coactivator 2	Protein Coding	Q53ET0	53	GC01M153947	1.32594633102417	https://www.genecards.org/cgi-bin/carddisp.pl?gene=CRTC2
EEF1D	Eukaryotic Translation Elongation Factor 1 Delta	Protein Coding	P29692	53	GC08M143579	1.32594633102417	https://www.genecards.org/cgi-bin/carddisp.pl?gene=EEF1D
P3H1	Prolyl 3-Hydroxylase 1	Protein Coding	Q32P28	53	GC01M042746	1.32594633102417	https://www.genecards.org/cgi-bin/carddisp.pl?gene=P3H1
PA2G4	Proliferation-Associated 2G4	Protein Coding	Q9UQ80	53	GC12P081624	1.32594633102417	https://www.genecards.org/cgi-bin/carddisp.pl?gene=PA2G4
PSMD8	Proteasome 26S Subunit, Non-ATPase 8	Protein Coding	P48556	53	GC19P038374	1.32594633102417	https://www.genecards.org/cgi-bin/carddisp.pl?gene=PSMD8
ENAH	ENAH Actin Regulator	Protein Coding	Q8N8S7	52	GC01M225486	1.32594633102417	https://www.genecards.org/cgi-bin/carddisp.pl?gene=ENAH
MTDH	Metadherin	Protein Coding	Q86UE4	52	GC08P097644	1.32594633102417	https://www.genecards.org/cgi-bin/carddisp.pl?gene=MTDH
NFE2L1	NFE2 Like BZIP Transcription Factor 1	Protein Coding	Q14494	52	GC17P165445	1.32594633102417	https://www.genecards.org/cgi-bin/carddisp.pl?gene=NFE2L1
SF1	Splicing Factor 1	Protein Coding	Q15637	50	GC11M064764	1.32594633102417	https://www.genecards.org/cgi-bin/carddisp.pl?gene=SF1
CCL8	C-C Motif Chemokine Ligand 8	Protein Coding	P80075	48	GC17P034319	1.32594633102417	https://www.genecards.org/cgi-bin/carddisp.pl?gene=CCL8
HES5	Hes Family BHLH Transcription Factor 5	Protein Coding	Q5TA89	48	GC01M002528	1.32594633102417	https://www.genecards.org/cgi-bin/carddisp.pl?gene=HES5
EHD4	EH Domain Containing 4	Protein Coding	Q9H223	47	GC15M041895	1.32594633102417	https://www.genecards.org/cgi-bin/carddisp.pl?gene=EHD4
GLOD4	Glyoxalase Domain Containing 4	Protein Coding	Q9HC38	46	GC17M000757	1.32594633102417	https://www.genecards.org/cgi-bin/carddisp.pl?gene=GLOD4
NASP	Nuclear Autoantigenic Sperm Protein	Protein Coding	P49321	46	GC01P045583	1.32594633102417	https://www.genecards.org/cgi-bin/carddisp.pl?gene=NASP
APMAP	Adipocyte Plasma Membrane Associated Protein	Protein Coding	Q9HDC9	45	GC20M024962	1.32594633102417	https://www.genecards.org/cgi-bin/carddisp.pl?gene=APMAP
GCN1	GCN1 Activator Of EIF2AK4	Protein Coding	Q92616	45	GC12M120128	1.32594633102417	https://www.genecards.org/cgi-bin/carddisp.pl?gene=GCN1
BZW1	Basic Leucine Zipper And W2 Domains 1	Protein Coding	Q7L1Q6	42	GC02P200810	1.32594633102417	https://www.genecards.org/cgi-bin/carddisp.pl?gene=BZW1
MIR373	MicroRNA 373	RNA Gene		28	GC19P162649	1.32594633102417	https://www.genecards.org/cgi-bin/carddisp.pl?gene=MIR373
LOC111365141	NOS2 5' Regulatory Region	Functional Element		8	GC17P027800	1.32594633102417	https://www.genecards.org/cgi-bin/carddisp.pl?gene=LOC111365141
FLT3	Fms Related Receptor Tyrosine Kinase 3	Protein Coding	P36888	66	GC13M028003	1.28773736953735	https://www.genecards.org/cgi-bin/carddisp.pl?gene=FLT3
PRKCA	Protein Kinase C Alpha	Protein Coding	P17252	65	GC17P066302	1.28773736953735	https://www.genecards.org/cgi-bin/carddisp.pl?gene=PRKCA
ADAM17	ADAM Metallopeptidase Domain 17	Protein Coding	P78536	63	GC02M009488	1.28773736953735	https://www.genecards.org/cgi-bin/carddisp.pl?gene=ADAM17
FTH1	Ferritin Heavy Chain 1	Protein Coding	P02794	63	GC11M061959	1.28773736953735	https://www.genecards.org/cgi-bin/carddisp.pl?gene=FTH1
SGK1	Serum/Glucocorticoid Regulated Kinase 1	Protein Coding	O00141	63	GC06M134169	1.28773736953735	https://www.genecards.org/cgi-bin/carddisp.pl?gene=SGK1
TOP1	DNA Topoisomerase I	Protein Coding	P11387	62	GC20P041028	1.28773736953735	https://www.genecards.org/cgi-bin/carddisp.pl?gene=TOP1
ABCC6	ATP Binding Cassette Subfamily C Member 6	Protein Coding	O95255	60	GC16M052674	1.28773736953735	https://www.genecards.org/cgi-bin/carddisp.pl?gene=ABCC6
ALDH1A1	Aldehyde Dehydrogenase 1 Family Member A1	Protein Coding	P00352	60	GC09M072900	1.28773736953735	https://www.genecards.org/cgi-bin/carddisp.pl?gene=ALDH1A1
CDH5	Cadherin 5	Protein Coding	P33151	60	GC16P066366	1.28773736953735	https://www.genecards.org/cgi-bin/carddisp.pl?gene=CDH5
CUL3	Cullin 3	Protein Coding	Q13618	60	GC02M224470	1.28773736953735	https://www.genecards.org/cgi-bin/carddisp.pl?gene=CUL3
EEF1A2	Eukaryotic Translation Elongation Factor 1 Alpha 2	Protein Coding	Q05639	60	GC20M063479	1.28773736953735	https://www.genecards.org/cgi-bin/carddisp.pl?gene=EEF1A2
WNT3A	Wnt Family Member 3A	Protein Coding	P56704	60	GC01P233813	1.28773736953735	https://www.genecards.org/cgi-bin/carddisp.pl?gene=WNT3A
YES1	YES Proto-Oncogene 1, Src Family Tyrosine Kinase	Protein Coding	P07947	60	GC18M000721	1.28773736953735	https://www.genecards.org/cgi-bin/carddisp.pl?gene=YES1
YWHAQ	Tyrosine 3-Monooxygenase/Tryptophan 5-Monooxygenase Activation Protein Theta	Protein Coding	P27348	60	GC02M009583	1.28773736953735	https://www.genecards.org/cgi-bin/carddisp.pl?gene=YWHAQ
DIABLO	Diablo IAP-Binding Mitochondrial Protein	Protein Coding	Q9NR28	59	GC12M124897	1.28773736953735	https://www.genecards.org/cgi-bin/carddisp.pl?gene=DIABLO
EZR	Ezrin	Protein Coding	P15311	59	GC06M158765	1.28773736953735	https://www.genecards.org/cgi-bin/carddisp.pl?gene=EZR
HADHA	Hydroxyacyl-CoA Dehydrogenase Trifunctional Multienzyme Complex Subunit Alpha	Protein Coding	P40939	59	GC02M026190	1.28773736953735	https://www.genecards.org/cgi-bin/carddisp.pl?gene=HADHA
PSAT1	Phosphoserine Aminotransferase 1	Protein Coding	Q9Y617	59	GC09P078297	1.28773736953735	https://www.genecards.org/cgi-bin/carddisp.pl?gene=PSAT1
TRAF6	TNF Receptor Associated Factor 6	Protein Coding	Q9Y4K3	59	GC11M036467	1.28773736953735	https://www.genecards.org/cgi-bin/carddisp.pl?gene=TRAF6
ATP6V1A	ATPase H+ Transporting V1 Subunit A	Protein Coding	P38606	58	GC03P113904	1.28773736953735	https://www.genecards.org/cgi-bin/carddisp.pl?gene=ATP6V1A
CTNND1	Catenin Delta 1	Protein Coding	O60716	58	GC11P113599	1.28773736953735	https://www.genecards.org/cgi-bin/carddisp.pl?gene=CTNND1
MYH14	Myosin Heavy Chain 14	Protein Coding	Q7Z406	58	GC19P162473	1.28773736953735	https://www.genecards.org/cgi-bin/carddisp.pl?gene=MYH14
PLK2	Polo Like Kinase 2	Protein Coding	Q9NYY3	58	GC05M058453	1.28773736953735	https://www.genecards.org/cgi-bin/carddisp.pl?gene=PLK2
TFPI	Tissue Factor Pathway Inhibitor	Protein Coding	P10646	58	GC02M187464	1.28773736953735	https://www.genecards.org/cgi-bin/carddisp.pl?gene=TFPI
ADM	Adrenomedullin	Protein Coding	P35318	57	GC11P023149	1.28773736953735	https://www.genecards.org/cgi-bin/carddisp.pl?gene=ADM
ALDH1B1	Aldehyde Dehydrogenase 1 Family Member B1	Protein Coding	P30837	57	GC09P038392	1.28773736953735	https://www.genecards.org/cgi-bin/carddisp.pl?gene=ALDH1B1
AP3B1	Adaptor Related Protein Complex 3 Subunit Beta 1	Protein Coding	O00203	57	GC05M082289	1.28773736953735	https://www.genecards.org/cgi-bin/carddisp.pl?gene=AP3B1
APPL1	Adaptor Protein, Phosphotyrosine Interacting With PH Domain And Leucine Zipper 1	Protein Coding	Q9UKG1	57	GC03P057227	1.28773736953735	https://www.genecards.org/cgi-bin/carddisp.pl?gene=APPL1
ARRB2	Arrestin Beta 2	Protein Coding	P32121	57	GC17P164013	1.28773736953735	https://www.genecards.org/cgi-bin/carddisp.pl?gene=ARRB2
DDOST	Dolichyl-Diphosphooligosaccharide--Protein Glycosyltransferase Non-Catalytic Subunit	Protein Coding	P39656	57	GC01M020651	1.28773736953735	https://www.genecards.org/cgi-bin/carddisp.pl?gene=DDOST
NCOR1	Nuclear Receptor Corepressor 1	Protein Coding	O75376	57	GC17M016029	1.28773736953735	https://www.genecards.org/cgi-bin/carddisp.pl?gene=NCOR1
RUVBL1	RuvB Like AAA ATPase 1	Protein Coding	Q9Y265	57	GC03M128064	1.28773736953735	https://www.genecards.org/cgi-bin/carddisp.pl?gene=RUVBL1
SUCLG1	Succinate-CoA Ligase GDP/ADP-Forming Subunit Alpha	Protein Coding	P53597	57	GC02M084423	1.28773736953735	https://www.genecards.org/cgi-bin/carddisp.pl?gene=SUCLG1
TUBA1B	Tubulin Alpha 1b	Protein Coding	P68363	57	GC12M049127	1.28773736953735	https://www.genecards.org/cgi-bin/carddisp.pl?gene=TUBA1B
CDC37	Cell Division Cycle 37, HSP90 Cochaperone	Protein Coding	Q16543	56	GC19M010391	1.28773736953735	https://www.genecards.org/cgi-bin/carddisp.pl?gene=CDC37
CYP51A1	Cytochrome P450 Family 51 Subfamily A Member 1	Protein Coding	Q16850	56	GC07M092112	1.28773736953735	https://www.genecards.org/cgi-bin/carddisp.pl?gene=CYP51A1
EPRS1	Glutamyl-Prolyl-TRNA Synthetase 1	Protein Coding	P07814	56	GC01M219969	1.28773736953735	https://www.genecards.org/cgi-bin/carddisp.pl?gene=EPRS1
GALE	UDP-Galactose-4-Epimerase	Protein Coding	Q14376	56	GC01M023795	1.28773736953735	https://www.genecards.org/cgi-bin/carddisp.pl?gene=GALE
OPA1	OPA1 Mitochondrial Dynamin Like GTPase	Protein Coding	O60313	56	GC03P193594	1.28773736953735	https://www.genecards.org/cgi-bin/carddisp.pl?gene=OPA1
PPP2CB	Protein Phosphatase 2 Catalytic Subunit Beta	Protein Coding	P62714	56	GC08M031090	1.28773736953735	https://www.genecards.org/cgi-bin/carddisp.pl?gene=PPP2CB
RAMP2	Receptor Activity Modifying Protein 2	Protein Coding	O60895	56	GC17P042758	1.28773736953735	https://www.genecards.org/cgi-bin/carddisp.pl?gene=RAMP2
SET	SET Nuclear Proto-Oncogene	Protein Coding	Q01105	56	GC09P156001	1.28773736953735	https://www.genecards.org/cgi-bin/carddisp.pl?gene=SET
ST3GAL4	ST3 Beta-Galactoside Alpha-2,3-Sialyltransferase 4	Protein Coding	Q11206	56	GC11P126355	1.28773736953735	https://www.genecards.org/cgi-bin/carddisp.pl?gene=ST3GAL4
TCP1	T-Complex 1	Protein Coding	P17987	56	GC06M159778	1.28773736953735	https://www.genecards.org/cgi-bin/carddisp.pl?gene=TCP1
ADNP	Activity Dependent Neuroprotector Homeobox	Protein Coding	Q9H2P0	55	GC20M050888	1.28773736953735	https://www.genecards.org/cgi-bin/carddisp.pl?gene=ADNP
ATG16L1	Autophagy Related 16 Like 1	Protein Coding	Q676U5	55	GC02P235454	1.28773736953735	https://www.genecards.org/cgi-bin/carddisp.pl?gene=ATG16L1
CUL4B	Cullin 4B	Protein Coding	Q13620	55	GC0XM120572	1.28773736953735	https://www.genecards.org/cgi-bin/carddisp.pl?gene=CUL4B
NR0B2	Nuclear Receptor Subfamily 0 Group B Member 2	Protein Coding	Q15466	55	GC01M037052	1.28773736953735	https://www.genecards.org/cgi-bin/carddisp.pl?gene=NR0B2
RPS10	Ribosomal Protein S10	Protein Coding	P46783	55	GC06M111696	1.28773736953735	https://www.genecards.org/cgi-bin/carddisp.pl?gene=RPS10
ADRM1	ADRM1 26S Proteasome Ubiquitin Receptor	Protein Coding	Q16186	54	GC20P062302	1.28773736953735	https://www.genecards.org/cgi-bin/carddisp.pl?gene=ADRM1
GPX7	Glutathione Peroxidase 7	Protein Coding	Q96SL4	54	GC01P052602	1.28773736953735	https://www.genecards.org/cgi-bin/carddisp.pl?gene=GPX7
MGST1	Microsomal Glutathione S-Transferase 1	Protein Coding	P10620	54	GC12P016347	1.28773736953735	https://www.genecards.org/cgi-bin/carddisp.pl?gene=MGST1
SLC25A22	Solute Carrier Family 25 Member 22	Protein Coding	Q9H936	54	GC11M015796	1.28773736953735	https://www.genecards.org/cgi-bin/carddisp.pl?gene=SLC25A22
PSMC6	Proteasome 26S Subunit, ATPase 6	Protein Coding	P62333	53	GC14P052707	1.28773736953735	https://www.genecards.org/cgi-bin/carddisp.pl?gene=PSMC6
RAB10	RAB10, Member RAS Oncogene Family	Protein Coding	P61026	53	GC02P026033	1.28773736953735	https://www.genecards.org/cgi-bin/carddisp.pl?gene=RAB10
RPLP2	Ribosomal Protein Lateral Stalk Subunit P2	Protein Coding	P05387	53	GC11P022705	1.28773736953735	https://www.genecards.org/cgi-bin/carddisp.pl?gene=RPLP2
RPS15A	Ribosomal Protein S15a	Protein Coding	P62244	53	GC16M018781	1.28773736953735	https://www.genecards.org/cgi-bin/carddisp.pl?gene=RPS15A
ZDHHC9	ZDHHC Palmitoyltransferase 9	Protein Coding	Q9Y397	53	GC0XM129803	1.28773736953735	https://www.genecards.org/cgi-bin/carddisp.pl?gene=ZDHHC9
BAG5	BAG Cochaperone 5	Protein Coding	Q9UL15	52	GC14M103556	1.28773736953735	https://www.genecards.org/cgi-bin/carddisp.pl?gene=BAG5
CCN1	Cellular Communication Network Factor 1	Protein Coding	O00622	52	GC01P089746	1.28773736953735	https://www.genecards.org/cgi-bin/carddisp.pl?gene=CCN1
EXOSC8	Exosome Component 8	Protein Coding	Q96B26	52	GC13P036998	1.28773736953735	https://www.genecards.org/cgi-bin/carddisp.pl?gene=EXOSC8
GSTK1	Glutathione S-Transferase Kappa 1	Protein Coding	Q9Y2Q3	52	GC07P168203	1.28773736953735	https://www.genecards.org/cgi-bin/carddisp.pl?gene=GSTK1
RAB8A	RAB8A, Member RAS Oncogene Family	Protein Coding	P61006	52	GC19P016111	1.28773736953735	https://www.genecards.org/cgi-bin/carddisp.pl?gene=RAB8A
RPL6	Ribosomal Protein L6	Protein Coding	Q02878	52	GC12M112320	1.28773736953735	https://www.genecards.org/cgi-bin/carddisp.pl?gene=RPL6
WDR45	WD Repeat Domain 45	Protein Coding	Q9Y484	52	GC0XM049074	1.28773736953735	https://www.genecards.org/cgi-bin/carddisp.pl?gene=WDR45
RPS2	Ribosomal Protein S2	Protein Coding	P15880	51	GC16M052143	1.28773736953735	https://www.genecards.org/cgi-bin/carddisp.pl?gene=RPS2
SNRPD2	Small Nuclear Ribonucleoprotein D2 Polypeptide	Protein Coding	P62316	51	GC19M112671	1.28773736953735	https://www.genecards.org/cgi-bin/carddisp.pl?gene=SNRPD2
CLPTM1L	CLPTM1 Like	Protein Coding	Q96KA5	50	GC05M001317	1.28773736953735	https://www.genecards.org/cgi-bin/carddisp.pl?gene=CLPTM1L
HM13	Histocompatibility Minor 13	Protein Coding	Q8TCT9	50	GC20P031514	1.28773736953735	https://www.genecards.org/cgi-bin/carddisp.pl?gene=HM13
MUL1	Mitochondrial E3 Ubiquitin Protein Ligase 1	Protein Coding	Q969V5	50	GC01M020499	1.28773736953735	https://www.genecards.org/cgi-bin/carddisp.pl?gene=MUL1
RPL27A	Ribosomal Protein L27a	Protein Coding	P46776	50	GC11P008682	1.28773736953735	https://www.genecards.org/cgi-bin/carddisp.pl?gene=RPL27A
SF3A1	Splicing Factor 3a Subunit 1	Protein Coding	Q15459	50	GC22M030331	1.28773736953735	https://www.genecards.org/cgi-bin/carddisp.pl?gene=SF3A1
STAU1	Staufen Double-Stranded RNA Binding Protein 1	Protein Coding	O95793	50	GC20M049113	1.28773736953735	https://www.genecards.org/cgi-bin/carddisp.pl?gene=STAU1
ANP32B	Acidic Nuclear Phosphoprotein 32 Family Member B	Protein Coding	Q92688	49	GC09P097983	1.28773736953735	https://www.genecards.org/cgi-bin/carddisp.pl?gene=ANP32B
COPS6	COP9 Signalosome Subunit 6	Protein Coding	Q7L5N1	49	GC07P100088	1.28773736953735	https://www.genecards.org/cgi-bin/carddisp.pl?gene=COPS6
SNRPD3	Small Nuclear Ribonucleoprotein D3 Polypeptide	Protein Coding	P62318	49	GC22P024555	1.28773736953735	https://www.genecards.org/cgi-bin/carddisp.pl?gene=SNRPD3
CGAS	Cyclic GMP-AMP Synthase	Protein Coding	Q8N884	48	GC06M112128	1.28773736953735	https://www.genecards.org/cgi-bin/carddisp.pl?gene=CGAS
PTGR1	Prostaglandin Reductase 1	Protein Coding	Q14914	47	GC09M111549	1.28773736953735	https://www.genecards.org/cgi-bin/carddisp.pl?gene=PTGR1
SPRTN	SprT-Like N-Terminal Domain	Protein Coding	Q9H040	47	GC01P231337	1.28773736953735	https://www.genecards.org/cgi-bin/carddisp.pl?gene=SPRTN
DNAJB14	DnaJ Heat Shock Protein Family (Hsp40) Member B14	Protein Coding	Q8TBM8	46	GC04M099896	1.28773736953735	https://www.genecards.org/cgi-bin/carddisp.pl?gene=DNAJB14
QNG1	Q-Nucleotide N-Glycosylase 1	Protein Coding	Q5T6V5	39	GC09M083938	1.28773736953735	https://www.genecards.org/cgi-bin/carddisp.pl?gene=QNG1
MIR24-2	MicroRNA 24-2	RNA Gene		27	GC19M112016	1.28773736953735	https://www.genecards.org/cgi-bin/carddisp.pl?gene=MIR24-2
MIR381	MicroRNA 381	RNA Gene		27	GC14P122509	1.28773736953735	https://www.genecards.org/cgi-bin/carddisp.pl?gene=MIR381
MIR708	MicroRNA 708	RNA Gene		27	GC11M079402	1.28773736953735	https://www.genecards.org/cgi-bin/carddisp.pl?gene=MIR708
MIR216B	MicroRNA 216b	RNA Gene		24	GC02M056000	1.28773736953735	https://www.genecards.org/cgi-bin/carddisp.pl?gene=MIR216B
LINC00629	Long Intergenic Non-Protein Coding RNA 629	RNA Gene		21	GC0XP134549	1.28773736953735	https://www.genecards.org/cgi-bin/carddisp.pl?gene=LINC00629
MSBP1	Minisatellite Binding Protein 1	Protein Coding		10	GC00U990213	1.28773736953735	https://www.genecards.org/cgi-bin/carddisp.pl?gene=MSBP1
LOC129992166	ATAC-STARR-Seq Lymphoblastoid Silent Region 15229	Functional Element		5	GC04P031838	1.28773736953735	https://www.genecards.org/cgi-bin/carddisp.pl?gene=LOC129992166
MAP2K2	Mitogen-Activated Protein Kinase Kinase 2	Protein Coding	P36507	67	GC19M004090	1.24547410011292	https://www.genecards.org/cgi-bin/carddisp.pl?gene=MAP2K2
NOTCH1	Notch Receptor 1	Protein Coding	P46531	66	GC09M139438	1.24547410011292	https://www.genecards.org/cgi-bin/carddisp.pl?gene=NOTCH1
FN1	Fibronectin 1	Protein Coding	P02751	63	GC02M215360	1.24547410011292	https://www.genecards.org/cgi-bin/carddisp.pl?gene=FN1
PSEN2	Presenilin 2	Protein Coding	P49810	63	GC01P226870	1.24547410011292	https://www.genecards.org/cgi-bin/carddisp.pl?gene=PSEN2
ADRB1	Adrenoceptor Beta 1	Protein Coding	P08588	62	GC10P129450	1.24547410011292	https://www.genecards.org/cgi-bin/carddisp.pl?gene=ADRB1
ATP2A1	ATPase Sarcoplasmic/Endoplasmic Reticulum Ca2+ Transporting 1	Protein Coding	O14983	62	GC16P128791	1.24547410011292	https://www.genecards.org/cgi-bin/carddisp.pl?gene=ATP2A1
ACTA1	Actin Alpha 1, Skeletal Muscle	Protein Coding	P68133	61	GC01M230800	1.24547410011292	https://www.genecards.org/cgi-bin/carddisp.pl?gene=ACTA1
AKR1B1	Aldo-Keto Reductase Family 1 Member B	Protein Coding	P15121	60	GC07M134442	1.24547410011292	https://www.genecards.org/cgi-bin/carddisp.pl?gene=AKR1B1
MSN	Moesin	Protein Coding	P26038	60	GC0XP065588	1.24547410011292	https://www.genecards.org/cgi-bin/carddisp.pl?gene=MSN
NME1	NME/NM23 Nucleoside Diphosphate Kinase 1	Protein Coding	P15531	60	GC17P165542	1.24547410011292	https://www.genecards.org/cgi-bin/carddisp.pl?gene=NME1
RPS19	Ribosomal Protein S19	Protein Coding	P39019	60	GC19P162158	1.24547410011292	https://www.genecards.org/cgi-bin/carddisp.pl?gene=RPS19
ARHGDIA	Rho GDP Dissociation Inhibitor Alpha	Protein Coding	P52565	59	GC17M081867	1.24547410011292	https://www.genecards.org/cgi-bin/carddisp.pl?gene=ARHGDIA
CETP	Cholesteryl Ester Transfer Protein	Protein Coding	P11597	59	GC16P056961	1.24547410011292	https://www.genecards.org/cgi-bin/carddisp.pl?gene=CETP
ECHS1	Enoyl-CoA Hydratase, Short Chain 1	Protein Coding	P30084	59	GC10M133362	1.24547410011292	https://www.genecards.org/cgi-bin/carddisp.pl?gene=ECHS1
LMNB1	Lamin B1	Protein Coding	P20700	59	GC05P126776	1.24547410011292	https://www.genecards.org/cgi-bin/carddisp.pl?gene=LMNB1
PCYT1A	Phosphate Cytidylyltransferase 1A, Choline	Protein Coding	P49585	59	GC03M196214	1.24547410011292	https://www.genecards.org/cgi-bin/carddisp.pl?gene=PCYT1A
PPP2R2A	Protein Phosphatase 2 Regulatory Subunit Balpha	Protein Coding	P63151	59	GC08P026680	1.24547410011292	https://www.genecards.org/cgi-bin/carddisp.pl?gene=PPP2R2A
CDC73	Cell Division Cycle 73	Protein Coding	Q6P1J9	58	GC01P193121	1.24547410011292	https://www.genecards.org/cgi-bin/carddisp.pl?gene=CDC73
PLOD3	Procollagen-Lysine,2-Oxoglutarate 5-Dioxygenase 3	Protein Coding	O60568	58	GC07M101205	1.24547410011292	https://www.genecards.org/cgi-bin/carddisp.pl?gene=PLOD3
C1QBP	Complement C1q Binding Protein	Protein Coding	Q07021	57	GC17M005432	1.24547410011292	https://www.genecards.org/cgi-bin/carddisp.pl?gene=C1QBP
PLN	Phospholamban	Protein Coding	P26678	57	GC06P118548	1.24547410011292	https://www.genecards.org/cgi-bin/carddisp.pl?gene=PLN
PSMB1	Proteasome 20S Subunit Beta 1	Protein Coding	P20618	57	GC06M170535	1.24547410011292	https://www.genecards.org/cgi-bin/carddisp.pl?gene=PSMB1
RPL10	Ribosomal Protein L10	Protein Coding	P27635	57	GC0XP154389	1.24547410011292	https://www.genecards.org/cgi-bin/carddisp.pl?gene=RPL10
TP73	Tumor Protein P73	Protein Coding	O15350	57	GC01P003652	1.24547410011292	https://www.genecards.org/cgi-bin/carddisp.pl?gene=TP73
TUBB4B	Tubulin Beta 4B Class IVb	Protein Coding	P68371	57	GC09P137241	1.24547410011292	https://www.genecards.org/cgi-bin/carddisp.pl?gene=TUBB4B
CRYAA	Crystallin Alpha A	Protein Coding	P02489	56	GC21P043169	1.24547410011292	https://www.genecards.org/cgi-bin/carddisp.pl?gene=CRYAA
EPHX1	Epoxide Hydrolase 1	Protein Coding	P07099	56	GC01P225810	1.24547410011292	https://www.genecards.org/cgi-bin/carddisp.pl?gene=EPHX1
PHB2	Prohibitin 2	Protein Coding	Q99623	56	GC12M006965	1.24547410011292	https://www.genecards.org/cgi-bin/carddisp.pl?gene=PHB2
PSMB6	Proteasome 20S Subunit Beta 6	Protein Coding	P28072	56	GC17P004796	1.24547410011292	https://www.genecards.org/cgi-bin/carddisp.pl?gene=PSMB6
PSMD14	Proteasome 26S Subunit, Non-ATPase 14	Protein Coding	O00487	56	GC02P161308	1.24547410011292	https://www.genecards.org/cgi-bin/carddisp.pl?gene=PSMD14
RANBP1	RAN Binding Protein 1	Protein Coding	P43487	56	GC22P020115	1.24547410011292	https://www.genecards.org/cgi-bin/carddisp.pl?gene=RANBP1
RPL35	Ribosomal Protein L35	Protein Coding	P42766	56	GC09M124857	1.24547410011292	https://www.genecards.org/cgi-bin/carddisp.pl?gene=RPL35
RPN1	Ribophorin I	Protein Coding	P04843	56	GC03M128619	1.24547410011292	https://www.genecards.org/cgi-bin/carddisp.pl?gene=RPN1
RPS20	Ribosomal Protein S20	Protein Coding	P60866	56	GC08M056067	1.24547410011292	https://www.genecards.org/cgi-bin/carddisp.pl?gene=RPS20
VDAC2	Voltage Dependent Anion Channel 2	Protein Coding	P45880	56	GC10P075210	1.24547410011292	https://www.genecards.org/cgi-bin/carddisp.pl?gene=VDAC2
CLIC1	Chloride Intracellular Channel 1	Protein Coding	O00299	55	GC06M111549	1.24547410011292	https://www.genecards.org/cgi-bin/carddisp.pl?gene=CLIC1
PSMB2	Proteasome 20S Subunit Beta 2	Protein Coding	P49721	55	GC01M035599	1.24547410011292	https://www.genecards.org/cgi-bin/carddisp.pl?gene=PSMB2
PSMD3	Proteasome 26S Subunit, Non-ATPase 3	Protein Coding	O43242	55	GC17P039980	1.24547410011292	https://www.genecards.org/cgi-bin/carddisp.pl?gene=PSMD3
SLC33A1	Solute Carrier Family 33 Member 1	Protein Coding	O00400	55	GC03M155821	1.24547410011292	https://www.genecards.org/cgi-bin/carddisp.pl?gene=SLC33A1
EIF5	Eukaryotic Translation Initiation Factor 5	Protein Coding	P55010	54	GC14P103333	1.24547410011292	https://www.genecards.org/cgi-bin/carddisp.pl?gene=EIF5
FADS2	Fatty Acid Desaturase 2	Protein Coding	O95864	54	GC11P061792	1.24547410011292	https://www.genecards.org/cgi-bin/carddisp.pl?gene=FADS2
SAE1	SUMO1 Activating Enzyme Subunit 1	Protein Coding	Q9UBE0	54	GC19P162333	1.24547410011292	https://www.genecards.org/cgi-bin/carddisp.pl?gene=SAE1
CSE1L	Chromosome Segregation 1 Like	Protein Coding	P55060	53	GC20P049046	1.24547410011292	https://www.genecards.org/cgi-bin/carddisp.pl?gene=CSE1L
PPA1	Inorganic Pyrophosphatase 1	Protein Coding	Q15181	53	GC10M070202	1.24547410011292	https://www.genecards.org/cgi-bin/carddisp.pl?gene=PPA1
PSMB3	Proteasome 20S Subunit Beta 3	Protein Coding	P49720	53	GC17P038752	1.24547410011292	https://www.genecards.org/cgi-bin/carddisp.pl?gene=PSMB3
PSMD6	Proteasome 26S Subunit, Non-ATPase 6	Protein Coding	Q15008	53	GC03M063973	1.24547410011292	https://www.genecards.org/cgi-bin/carddisp.pl?gene=PSMD6
RPS16	Ribosomal Protein S16	Protein Coding	P62249	53	GC19M039433	1.24547410011292	https://www.genecards.org/cgi-bin/carddisp.pl?gene=RPS16
SLC25A6	Solute Carrier Family 25 Member 6	Protein Coding	P12236	53	GC0XM001386	1.24547410011292	https://www.genecards.org/cgi-bin/carddisp.pl?gene=SLC25A6
TAGLN2	Transgelin 2	Protein Coding	P37802	53	GC01M159918	1.24547410011292	https://www.genecards.org/cgi-bin/carddisp.pl?gene=TAGLN2
CAPZA1	Capping Actin Protein Of Muscle Z-Line Subunit Alpha 1	Protein Coding	P52907	52	GC01P112619	1.24547410011292	https://www.genecards.org/cgi-bin/carddisp.pl?gene=CAPZA1
EIF1AX	Eukaryotic Translation Initiation Factor 1A X-Linked	Protein Coding	P47813	52	GC0XM020124	1.24547410011292	https://www.genecards.org/cgi-bin/carddisp.pl?gene=EIF1AX
HNRNPM	Heterogeneous Nuclear Ribonucleoprotein M	Protein Coding	P52272	52	GC19P008444	1.24547410011292	https://www.genecards.org/cgi-bin/carddisp.pl?gene=HNRNPM
PAFAH1B2	Platelet Activating Factor Acetylhydrolase 1b Catalytic Subunit 2	Protein Coding	P68402	52	GC11P117144	1.24547410011292	https://www.genecards.org/cgi-bin/carddisp.pl?gene=PAFAH1B2
SMPD4	Sphingomyelin Phosphodiesterase 4	Protein Coding	Q9NXE4	52	GC02M130151	1.24547410011292	https://www.genecards.org/cgi-bin/carddisp.pl?gene=SMPD4
FAF2	Fas Associated Factor Family Member 2	Protein Coding	Q96CS3	51	GC05P176447	1.24547410011292	https://www.genecards.org/cgi-bin/carddisp.pl?gene=FAF2
WNT16	Wnt Family Member 16	Protein Coding	Q9UBV4	51	GC07P121325	1.24547410011292	https://www.genecards.org/cgi-bin/carddisp.pl?gene=WNT16
CAND1	Cullin Associated And Neddylation Dissociated 1	Protein Coding	Q86VP6	50	GC12P081940	1.24547410011292	https://www.genecards.org/cgi-bin/carddisp.pl?gene=CAND1
ESYT1	Extended Synaptotagmin 1	Protein Coding	Q9BSJ8	50	GC12P081627	1.24547410011292	https://www.genecards.org/cgi-bin/carddisp.pl?gene=ESYT1
FFAR4	Free Fatty Acid Receptor 4	Protein Coding	Q5NUL3	50	GC10P093566	1.24547410011292	https://www.genecards.org/cgi-bin/carddisp.pl?gene=FFAR4
APLN	Apelin	Protein Coding	Q9ULZ1	49	GC0XM129645	1.24547410011292	https://www.genecards.org/cgi-bin/carddisp.pl?gene=APLN
ATL3	Atlastin GTPase 3	Protein Coding	Q6DD88	49	GC11M063624	1.24547410011292	https://www.genecards.org/cgi-bin/carddisp.pl?gene=ATL3
STX17	Syntaxin 17	Protein Coding	P56962	48	GC09P099906	1.24547410011292	https://www.genecards.org/cgi-bin/carddisp.pl?gene=STX17
PHPT1	Phosphohistidine Phosphatase 1	Protein Coding	Q9NRX4	47	GC09P136848	1.24547410011292	https://www.genecards.org/cgi-bin/carddisp.pl?gene=PHPT1
ZC3HAV1	Zinc Finger CCCH-Type Containing, Antiviral 1	Protein Coding	Q7Z2W4	47	GC07M139152	1.24547410011292	https://www.genecards.org/cgi-bin/carddisp.pl?gene=ZC3HAV1
BDH2	3-Hydroxybutyrate Dehydrogenase 2	Protein Coding	Q9BUT1	46	GC04M103077	1.24547410011292	https://www.genecards.org/cgi-bin/carddisp.pl?gene=BDH2
HDGFL2	HDGF Like 2	Protein Coding	Q7Z4V5	46	GC19P161086	1.24547410011292	https://www.genecards.org/cgi-bin/carddisp.pl?gene=HDGFL2
TMEM201	Transmembrane Protein 201	Protein Coding	Q5SNT2	45	GC01P009588	1.24547410011292	https://www.genecards.org/cgi-bin/carddisp.pl?gene=TMEM201
LRRC59	Leucine Rich Repeat Containing 59	Protein Coding	Q96AG4	44	GC17M050375	1.24547410011292	https://www.genecards.org/cgi-bin/carddisp.pl?gene=LRRC59
FKBP9	FKBP Prolyl Isomerase 9	Protein Coding	O95302	42	GC07P032957	1.24547410011292	https://www.genecards.org/cgi-bin/carddisp.pl?gene=FKBP9
OSTN	Osteocrin	Protein Coding	P61366	42	GC03P191199	1.24547410011292	https://www.genecards.org/cgi-bin/carddisp.pl?gene=OSTN
SERPINA2	Serpin Family A Member 2 (Gene/Pseudogene)	Protein Coding	P20848	38	GC14M125348	1.24547410011292	https://www.genecards.org/cgi-bin/carddisp.pl?gene=SERPINA2
MIR21	MicroRNA 21	RNA Gene		32	GC17P059841	1.24547410011292	https://www.genecards.org/cgi-bin/carddisp.pl?gene=MIR21
IFNL4	Interferon Lambda 4 (Gene/Pseudogene)	Protein Coding	K9M1U5	26	GC19M039246	1.24547410011292	https://www.genecards.org/cgi-bin/carddisp.pl?gene=IFNL4
SNORD47	Small Nucleolar RNA, C/D Box 47	RNA Gene		19	GC01M175201	1.24547410011292	https://www.genecards.org/cgi-bin/carddisp.pl?gene=SNORD47
MIR3648-1	MicroRNA 3648-1	RNA Gene		11	GC21P021689	1.24547410011292	https://www.genecards.org/cgi-bin/carddisp.pl?gene=MIR3648-1
ERBB3	Erb-B2 Receptor Tyrosine Kinase 3	Protein Coding	P21860	67	GC12P081625	1.1975029706955	https://www.genecards.org/cgi-bin/carddisp.pl?gene=ERBB3
ATR	ATR Checkpoint Kinase	Protein Coding	Q13535	66	GC03M142449	1.1975029706955	https://www.genecards.org/cgi-bin/carddisp.pl?gene=ATR
HDAC4	Histone Deacetylase 4	Protein Coding	P56524	65	GC02M239048	1.1975029706955	https://www.genecards.org/cgi-bin/carddisp.pl?gene=HDAC4
STAT6	Signal Transducer And Activator Of Transcription 6	Protein Coding	P42226	65	GC12M057095	1.1975029706955	https://www.genecards.org/cgi-bin/carddisp.pl?gene=STAT6
CA2	Carbonic Anhydrase 2	Protein Coding	P00918	64	GC08P085463	1.1975029706955	https://www.genecards.org/cgi-bin/carddisp.pl?gene=CA2
PPP2CA	Protein Phosphatase 2 Catalytic Subunit Alpha	Protein Coding	P67775	63	GC05M134194	1.1975029706955	https://www.genecards.org/cgi-bin/carddisp.pl?gene=PPP2CA
RPS6KB1	Ribosomal Protein S6 Kinase B1	Protein Coding	P23443	63	GC17P059893	1.1975029706955	https://www.genecards.org/cgi-bin/carddisp.pl?gene=RPS6KB1
RRM1	Ribonucleotide Reductase Catalytic Subunit M1	Protein Coding	P23921	63	GC11P022863	1.1975029706955	https://www.genecards.org/cgi-bin/carddisp.pl?gene=RRM1
REL	REL Proto-Oncogene, NF-KB Subunit	Protein Coding	Q04864	62	GC02P060881	1.1975029706955	https://www.genecards.org/cgi-bin/carddisp.pl?gene=REL
RHOA	Ras Homolog Family Member A	Protein Coding	P61586	62	GC03M049359	1.1975029706955	https://www.genecards.org/cgi-bin/carddisp.pl?gene=RHOA
CAD	Carbamoyl-Phosphate Synthetase 2, Aspartate Transcarbamylase, And Dihydroorotase	Protein Coding	P27708	61	GC02P027217	1.1975029706955	https://www.genecards.org/cgi-bin/carddisp.pl?gene=CAD
CPT1A	Carnitine Palmitoyltransferase 1A	Protein Coding	P50416	61	GC11M068754	1.1975029706955	https://www.genecards.org/cgi-bin/carddisp.pl?gene=CPT1A
DHCR7	7-Dehydrocholesterol Reductase	Protein Coding	Q9UBM7	60	GC11M143165	1.1975029706955	https://www.genecards.org/cgi-bin/carddisp.pl?gene=DHCR7
MIF	Macrophage Migration Inhibitory Factor	Protein Coding	P14174	60	GC22P023894	1.1975029706955	https://www.genecards.org/cgi-bin/carddisp.pl?gene=MIF
PCK1	Phosphoenolpyruvate Carboxykinase 1	Protein Coding	P35558	60	GC20P057561	1.1975029706955	https://www.genecards.org/cgi-bin/carddisp.pl?gene=PCK1
PDE3A	Phosphodiesterase 3A	Protein Coding	Q14432	60	GC12P080624	1.1975029706955	https://www.genecards.org/cgi-bin/carddisp.pl?gene=PDE3A
YWHAB	Tyrosine 3-Monooxygenase/Tryptophan 5-Monooxygenase Activation Protein Beta	Protein Coding	P31946	60	GC20P044885	1.1975029706955	https://www.genecards.org/cgi-bin/carddisp.pl?gene=YWHAB
ACAT2	Acetyl-CoA Acetyltransferase 2	Protein Coding	Q9BWD1	59	GC06P192690	1.1975029706955	https://www.genecards.org/cgi-bin/carddisp.pl?gene=ACAT2
ACSL4	Acyl-CoA Synthetase Long Chain Family Member 4	Protein Coding	O60488	59	GC0XM109624	1.1975029706955	https://www.genecards.org/cgi-bin/carddisp.pl?gene=ACSL4
ALDH3A2	Aldehyde Dehydrogenase 3 Family Member A2	Protein Coding	P51648	59	GC17P019648	1.1975029706955	https://www.genecards.org/cgi-bin/carddisp.pl?gene=ALDH3A2
ATF2	Activating Transcription Factor 2	Protein Coding	P15336	59	GC02M175072	1.1975029706955	https://www.genecards.org/cgi-bin/carddisp.pl?gene=ATF2
CRKL	CRK Like Proto-Oncogene, Adaptor Protein	Protein Coding	P46109	59	GC22P020917	1.1975029706955	https://www.genecards.org/cgi-bin/carddisp.pl?gene=CRKL
CSTB	Cystatin B	Protein Coding	P04080	59	GC21M043772	1.1975029706955	https://www.genecards.org/cgi-bin/carddisp.pl?gene=CSTB
DVL2	Dishevelled Segment Polarity Protein 2	Protein Coding	O14641	59	GC17M007225	1.1975029706955	https://www.genecards.org/cgi-bin/carddisp.pl?gene=DVL2
HLA-A	Major Histocompatibility Complex, Class I, A	Protein Coding	P04439	59	GC06P190669	1.1975029706955	https://www.genecards.org/cgi-bin/carddisp.pl?gene=HLA-A
MAP4K4	Mitogen-Activated Protein Kinase Kinase Kinase Kinase 4	Protein Coding	O95819	59	GC02P101696	1.1975029706955	https://www.genecards.org/cgi-bin/carddisp.pl?gene=MAP4K4
PEBP1	Phosphatidylethanolamine Binding Protein 1	Protein Coding	P30086	59	GC12P118218	1.1975029706955	https://www.genecards.org/cgi-bin/carddisp.pl?gene=PEBP1
PLOD2	Procollagen-Lysine,2-Oxoglutarate 5-Dioxygenase 2	Protein Coding	O00469	59	GC03M146035	1.1975029706955	https://www.genecards.org/cgi-bin/carddisp.pl?gene=PLOD2
SGPL1	Sphingosine-1-Phosphate Lyase 1	Protein Coding	O95470	59	GC10P070815	1.1975029706955	https://www.genecards.org/cgi-bin/carddisp.pl?gene=SGPL1
TBX21	T-Box Transcription Factor 21	Protein Coding	Q9UL17	59	GC17P047733	1.1975029706955	https://www.genecards.org/cgi-bin/carddisp.pl?gene=TBX21
TUBB2A	Tubulin Beta 2A Class IIa	Protein Coding	Q13885	59	GC06M003153	1.1975029706955	https://www.genecards.org/cgi-bin/carddisp.pl?gene=TUBB2A
UQCRFS1	Ubiquinol-Cytochrome C Reductase, Rieske Iron-Sulfur Polypeptide 1	Protein Coding	P47985	59	GC19M029205	1.1975029706955	https://www.genecards.org/cgi-bin/carddisp.pl?gene=UQCRFS1
YWHAH	Tyrosine 3-Monooxygenase/Tryptophan 5-Monooxygenase Activation Protein Eta	Protein Coding	Q04917	59	GC22P031944	1.1975029706955	https://www.genecards.org/cgi-bin/carddisp.pl?gene=YWHAH
ATG5	Autophagy Related 5	Protein Coding	Q9H1Y0	58	GC06M106045	1.1975029706955	https://www.genecards.org/cgi-bin/carddisp.pl?gene=ATG5
SFN	Stratifin	Protein Coding	P31947	58	GC01P084435	1.1975029706955	https://www.genecards.org/cgi-bin/carddisp.pl?gene=SFN
SLC25A1	Solute Carrier Family 25 Member 1	Protein Coding	P53007	58	GC22M087890	1.1975029706955	https://www.genecards.org/cgi-bin/carddisp.pl?gene=SLC25A1
SLC25A13	Solute Carrier Family 25 Member 13	Protein Coding	Q9UJS0	58	GC07M096120	1.1975029706955	https://www.genecards.org/cgi-bin/carddisp.pl?gene=SLC25A13
TKT	Transketolase	Protein Coding	P29401	58	GC03M053224	1.1975029706955	https://www.genecards.org/cgi-bin/carddisp.pl?gene=TKT
UMPS	Uridine Monophosphate Synthetase	Protein Coding	P11172	58	GC03P124730	1.1975029706955	https://www.genecards.org/cgi-bin/carddisp.pl?gene=UMPS
ABCB7	ATP Binding Cassette Subfamily B Member 7	Protein Coding	O75027	57	GC0XM075053	1.1975029706955	https://www.genecards.org/cgi-bin/carddisp.pl?gene=ABCB7
ALG1	ALG1 Chitobiosyldiphosphodolichol Beta-Mannosyltransferase	Protein Coding	Q9BT22	57	GC16P005033	1.1975029706955	https://www.genecards.org/cgi-bin/carddisp.pl?gene=ALG1
COASY	Coenzyme A Synthase	Protein Coding	Q13057	57	GC17P042561	1.1975029706955	https://www.genecards.org/cgi-bin/carddisp.pl?gene=COASY
CXCL10	C-X-C Motif Chemokine Ligand 10	Protein Coding	P02778	57	GC04M076021	1.1975029706955	https://www.genecards.org/cgi-bin/carddisp.pl?gene=CXCL10
CYC1	Cytochrome C1	Protein Coding	P08574	57	GC08P144095	1.1975029706955	https://www.genecards.org/cgi-bin/carddisp.pl?gene=CYC1
DLG1	Discs Large MAGUK Scaffold Protein 1	Protein Coding	Q12959	57	GC03M197042	1.1975029706955	https://www.genecards.org/cgi-bin/carddisp.pl?gene=DLG1
FKBP8	FKBP Prolyl Isomerase 8	Protein Coding	Q14318	57	GC19M112176	1.1975029706955	https://www.genecards.org/cgi-bin/carddisp.pl?gene=FKBP8
GALNT2	Polypeptide N-Acetylgalactosaminyltransferase 2	Protein Coding	Q10471	57	GC01P230057	1.1975029706955	https://www.genecards.org/cgi-bin/carddisp.pl?gene=GALNT2
GDF2	Growth Differentiation Factor 2	Protein Coding	Q9UK05	57	GC10P047322	1.1975029706955	https://www.genecards.org/cgi-bin/carddisp.pl?gene=GDF2
GNAI3	G Protein Subunit Alpha I3	Protein Coding	P08754	57	GC01P109548	1.1975029706955	https://www.genecards.org/cgi-bin/carddisp.pl?gene=GNAI3
MAOB	Monoamine Oxidase B	Protein Coding	P27338	57	GC0XM043766	1.1975029706955	https://www.genecards.org/cgi-bin/carddisp.pl?gene=MAOB
P4HA2	Prolyl 4-Hydroxylase Subunit Alpha 2	Protein Coding	O15460	57	GC05M132193	1.1975029706955	https://www.genecards.org/cgi-bin/carddisp.pl?gene=P4HA2
PICALM	Phosphatidylinositol Binding Clathrin Assembly Protein	Protein Coding	Q13492	57	GC11M085957	1.1975029706955	https://www.genecards.org/cgi-bin/carddisp.pl?gene=PICALM
POFUT1	Protein O-Fucosyltransferase 1	Protein Coding	Q9H488	57	GC20P032207	1.1975029706955	https://www.genecards.org/cgi-bin/carddisp.pl?gene=POFUT1
PRDX3	Peroxiredoxin 3	Protein Coding	P30048	57	GC10M119167	1.1975029706955	https://www.genecards.org/cgi-bin/carddisp.pl?gene=PRDX3
PSMD4	Proteasome 26S Subunit Ubiquitin Receptor, Non-ATPase 4	Protein Coding	P55036	57	GC01P179785	1.1975029706955	https://www.genecards.org/cgi-bin/carddisp.pl?gene=PSMD4
SIRT6	Sirtuin 6	Protein Coding	Q8N6T7	57	GC19M004174	1.1975029706955	https://www.genecards.org/cgi-bin/carddisp.pl?gene=SIRT6
SLC25A3	Solute Carrier Family 25 Member 3	Protein Coding	Q00325	57	GC12P098593	1.1975029706955	https://www.genecards.org/cgi-bin/carddisp.pl?gene=SLC25A3
TSG101	Tumor Susceptibility 101	Protein Coding	Q99816	57	GC11M018468	1.1975029706955	https://www.genecards.org/cgi-bin/carddisp.pl?gene=TSG101
APBB1	Amyloid Beta Precursor Protein Binding Family B Member 1	Protein Coding	O00213	56	GC11M016043	1.1975029706955	https://www.genecards.org/cgi-bin/carddisp.pl?gene=APBB1
CERS2	Ceramide Synthase 2	Protein Coding	Q96G23	56	GC01M150960	1.1975029706955	https://www.genecards.org/cgi-bin/carddisp.pl?gene=CERS2
CST3	Cystatin C	Protein Coding	P01034	56	GC20M024240	1.1975029706955	https://www.genecards.org/cgi-bin/carddisp.pl?gene=CST3
DDX41	DEAD-Box Helicase 41	Protein Coding	Q9UJV9	56	GC05M177511	1.1975029706955	https://www.genecards.org/cgi-bin/carddisp.pl?gene=DDX41
DFFA	DNA Fragmentation Factor Subunit Alpha	Protein Coding	O00273	56	GC01M010456	1.1975029706955	https://www.genecards.org/cgi-bin/carddisp.pl?gene=DFFA
ESD	Esterase D	Protein Coding	P10768	56	GC13M046771	1.1975029706955	https://www.genecards.org/cgi-bin/carddisp.pl?gene=ESD
HARS1	Histidyl-TRNA Synthetase 1	Protein Coding	P12081	56	GC05M140673	1.1975029706955	https://www.genecards.org/cgi-bin/carddisp.pl?gene=HARS1
HLA-C	Major Histocompatibility Complex, Class I, C	Protein Coding	P10321	56	GC06M111464	1.1975029706955	https://www.genecards.org/cgi-bin/carddisp.pl?gene=HLA-C
LGR5	Leucine Rich Repeat Containing G Protein-Coupled Receptor 5	Protein Coding	O75473	56	GC12P071439	1.1975029706955	https://www.genecards.org/cgi-bin/carddisp.pl?gene=LGR5
LRPAP1	LDL Receptor Related Protein Associated Protein 1	Protein Coding	P30533	56	GC04M006645	1.1975029706955	https://www.genecards.org/cgi-bin/carddisp.pl?gene=LRPAP1
MAPK8IP1	Mitogen-Activated Protein Kinase 8 Interacting Protein 1	Protein Coding	Q9UQF2	56	GC11P049446	1.1975029706955	https://www.genecards.org/cgi-bin/carddisp.pl?gene=MAPK8IP1
PABPN1	Poly(A) Binding Protein Nuclear 1	Protein Coding	Q86U42	56	GC14P064368	1.1975029706955	https://www.genecards.org/cgi-bin/carddisp.pl?gene=PABPN1
PFKFB3	6-Phosphofructo-2-Kinase/Fructose-2,6-Biphosphatase 3	Protein Coding	Q16875	56	GC10P006144	1.1975029706955	https://www.genecards.org/cgi-bin/carddisp.pl?gene=PFKFB3
PIGK	Phosphatidylinositol Glycan Anchor Biosynthesis Class K	Protein Coding	Q92643	56	GC01M077088	1.1975029706955	https://www.genecards.org/cgi-bin/carddisp.pl?gene=PIGK
PPIF	Peptidylprolyl Isomerase F	Protein Coding	P30405	56	GC10P128493	1.1975029706955	https://www.genecards.org/cgi-bin/carddisp.pl?gene=PPIF
RPL10A	Ribosomal Protein L10a	Protein Coding	P62906	56	GC06P190820	1.1975029706955	https://www.genecards.org/cgi-bin/carddisp.pl?gene=RPL10A
SH3GL1	SH3 Domain Containing GRB2 Like 1, Endophilin A2	Protein Coding	Q99961	56	GC19M004360	1.1975029706955	https://www.genecards.org/cgi-bin/carddisp.pl?gene=SH3GL1
SLC27A4	Solute Carrier Family 27 Member 4	Protein Coding	Q6P1M0	56	GC09P128340	1.1975029706955	https://www.genecards.org/cgi-bin/carddisp.pl?gene=SLC27A4
SMARCA5	SNF2 Related Chromatin Remodeling ATPase 5	Protein Coding	O60264	56	GC04P143513	1.1975029706955	https://www.genecards.org/cgi-bin/carddisp.pl?gene=SMARCA5
AHCYL1	Adenosylhomocysteinase Like 1	Protein Coding	O43865	55	GC01P109984	1.1975029706955	https://www.genecards.org/cgi-bin/carddisp.pl?gene=AHCYL1
ALDH9A1	Aldehyde Dehydrogenase 9 Family Member A1	Protein Coding	P49189	55	GC01M168922	1.1975029706955	https://www.genecards.org/cgi-bin/carddisp.pl?gene=ALDH9A1
ASPH	Aspartate Beta-Hydroxylase	Protein Coding	Q12797	55	GC08M061500	1.1975029706955	https://www.genecards.org/cgi-bin/carddisp.pl?gene=ASPH
BACE2	Beta-Secretase 2	Protein Coding	Q9Y5Z0	55	GC21P041168	1.1975029706955	https://www.genecards.org/cgi-bin/carddisp.pl?gene=BACE2
CNBP	CCHC-Type Zinc Finger Nucleic Acid Binding Protein	Protein Coding	P62633	55	GC03M129167	1.1975029706955	https://www.genecards.org/cgi-bin/carddisp.pl?gene=CNBP
CRTAP	Cartilage Associated Protein	Protein Coding	O75718	55	GC03P034141	1.1975029706955	https://www.genecards.org/cgi-bin/carddisp.pl?gene=CRTAP
ELOVL5	ELOVL Fatty Acid Elongase 5	Protein Coding	Q9NYP7	55	GC06M053267	1.1975029706955	https://www.genecards.org/cgi-bin/carddisp.pl?gene=ELOVL5
FADS1	Fatty Acid Desaturase 1	Protein Coding	O60427	55	GC11M061799	1.1975029706955	https://www.genecards.org/cgi-bin/carddisp.pl?gene=FADS1
FPGS	Folylpolyglutamate Synthase	Protein Coding	Q05932	55	GC09P127794	1.1975029706955	https://www.genecards.org/cgi-bin/carddisp.pl?gene=FPGS
HAX1	HCLS1 Associated Protein X-1	Protein Coding	O00165	55	GC01P179976	1.1975029706955	https://www.genecards.org/cgi-bin/carddisp.pl?gene=HAX1
KCNN2	Potassium Calcium-Activated Channel Subfamily N Member 2	Protein Coding	Q9H2S1	55	GC05P114058	1.1975029706955	https://www.genecards.org/cgi-bin/carddisp.pl?gene=KCNN2
NUP155	Nucleoporin 155	Protein Coding	O75694	55	GC05M037288	1.1975029706955	https://www.genecards.org/cgi-bin/carddisp.pl?gene=NUP155
P4HA1	Prolyl 4-Hydroxylase Subunit Alpha 1	Protein Coding	P13674	55	GC10M073007	1.1975029706955	https://www.genecards.org/cgi-bin/carddisp.pl?gene=P4HA1
PCBP1	Poly(RC) Binding Protein 1	Protein Coding	Q15365	55	GC02P070087	1.1975029706955	https://www.genecards.org/cgi-bin/carddisp.pl?gene=PCBP1
PPP1R13L	Protein Phosphatase 1 Regulatory Subunit 13 Like	Protein Coding	Q8WUF5	55	GC19M045379	1.1975029706955	https://www.genecards.org/cgi-bin/carddisp.pl?gene=PPP1R13L
PTRH2	Peptidyl-TRNA Hydrolase 2	Protein Coding	Q9Y3E5	55	GC17M059674	1.1975029706955	https://www.genecards.org/cgi-bin/carddisp.pl?gene=PTRH2
QKI	QKI, KH Domain Containing RNA Binding	Protein Coding	Q96PU8	55	GC06P163414	1.1975029706955	https://www.genecards.org/cgi-bin/carddisp.pl?gene=QKI
RPS27	Ribosomal Protein S27	Protein Coding	P42677	55	GC01P179953	1.1975029706955	https://www.genecards.org/cgi-bin/carddisp.pl?gene=RPS27
SRSF2	Serine And Arginine Rich Splicing Factor 2	Protein Coding	Q01130	55	GC17M076734	1.1975029706955	https://www.genecards.org/cgi-bin/carddisp.pl?gene=SRSF2
SUMO2	Small Ubiquitin Like Modifier 2	Protein Coding	P61956	55	GC17M075165	1.1975029706955	https://www.genecards.org/cgi-bin/carddisp.pl?gene=SUMO2
TAPBP	TAP Binding Protein	Protein Coding	O15533	55	GC06M033299	1.1975029706955	https://www.genecards.org/cgi-bin/carddisp.pl?gene=TAPBP
TPR	Translocated Promoter Region, Nuclear Basket Protein	Protein Coding	P12270	55	GC01M187189	1.1975029706955	https://www.genecards.org/cgi-bin/carddisp.pl?gene=TPR
UBE2K	Ubiquitin Conjugating Enzyme E2 K	Protein Coding	P61086	55	GC04P040362	1.1975029706955	https://www.genecards.org/cgi-bin/carddisp.pl?gene=UBE2K
DEK	DEK Proto-Oncogene	Protein Coding	P35659	54	GC06M018224	1.1975029706955	https://www.genecards.org/cgi-bin/carddisp.pl?gene=DEK
FARSA	Phenylalanyl-TRNA Synthetase Subunit Alpha	Protein Coding	Q9Y285	54	GC19M012922	1.1975029706955	https://www.genecards.org/cgi-bin/carddisp.pl?gene=FARSA
HNRNPR	Heterogeneous Nuclear Ribonucleoprotein R	Protein Coding	O43390	54	GC01M023303	1.1975029706955	https://www.genecards.org/cgi-bin/carddisp.pl?gene=HNRNPR
INPP5K	Inositol Polyphosphate-5-Phosphatase K	Protein Coding	Q9BT40	54	GC17M001494	1.1975029706955	https://www.genecards.org/cgi-bin/carddisp.pl?gene=INPP5K
PLIN3	Perilipin 3	Protein Coding	O60664	54	GC19M111678	1.1975029706955	https://www.genecards.org/cgi-bin/carddisp.pl?gene=PLIN3
PPIL1	Peptidylprolyl Isomerase Like 1	Protein Coding	Q9Y3C6	54	GC06M036854	1.1975029706955	https://www.genecards.org/cgi-bin/carddisp.pl?gene=PPIL1
PUF60	Poly(U) Binding Splicing Factor 60	Protein Coding	Q9UHX1	54	GC08M143816	1.1975029706955	https://www.genecards.org/cgi-bin/carddisp.pl?gene=PUF60
PUM1	Pumilio RNA Binding Family Member 1	Protein Coding	Q14671	54	GC01M030931	1.1975029706955	https://www.genecards.org/cgi-bin/carddisp.pl?gene=PUM1
SMN1	Survival Of Motor Neuron 1, Telomeric	Protein Coding	Q16637	54	GC05P070924	1.1975029706955	https://www.genecards.org/cgi-bin/carddisp.pl?gene=SMN1
SNRPB	Small Nuclear Ribonucleoprotein Polypeptides B And B1	Protein Coding	P14678	54	GC20M002461	1.1975029706955	https://www.genecards.org/cgi-bin/carddisp.pl?gene=SNRPB
STK26	Serine/Threonine Kinase 26	Protein Coding	Q9P289	54	GC0XP132023	1.1975029706955	https://www.genecards.org/cgi-bin/carddisp.pl?gene=STK26
YBX1	Y-Box Binding Protein 1	Protein Coding	P67809	54	GC01P042682	1.1975029706955	https://www.genecards.org/cgi-bin/carddisp.pl?gene=YBX1
ALG2	ALG2 Alpha-1,3/1,6-Mannosyltransferase	Protein Coding	Q9H553	53	GC09M099216	1.1975029706955	https://www.genecards.org/cgi-bin/carddisp.pl?gene=ALG2
B4GALT7	Beta-1,4-Galactosyltransferase 7	Protein Coding	Q9UBV7	53	GC05P177600	1.1975029706955	https://www.genecards.org/cgi-bin/carddisp.pl?gene=B4GALT7
BICD2	BICD Cargo Adaptor 2	Protein Coding	Q8TD16	53	GC09M092711	1.1975029706955	https://www.genecards.org/cgi-bin/carddisp.pl?gene=BICD2
BPNT2	3'(2'), 5'-Bisphosphate Nucleotidase 2	Protein Coding	Q9NX62	53	GC08M056958	1.1975029706955	https://www.genecards.org/cgi-bin/carddisp.pl?gene=BPNT2
CBX3	Chromobox 3	Protein Coding	Q13185	53	GC07P026201	1.1975029706955	https://www.genecards.org/cgi-bin/carddisp.pl?gene=CBX3
COIL	Coilin	Protein Coding	P38432	53	GC17M056938	1.1975029706955	https://www.genecards.org/cgi-bin/carddisp.pl?gene=COIL
DHX30	DExH-Box Helicase 30	Protein Coding	Q7L2E3	53	GC03P047802	1.1975029706955	https://www.genecards.org/cgi-bin/carddisp.pl?gene=DHX30
GPAA1	Glycosylphosphatidylinositol Anchor Attachment 1	Protein Coding	O43292	53	GC08P144082	1.1975029706955	https://www.genecards.org/cgi-bin/carddisp.pl?gene=GPAA1
IDI1	Isopentenyl-Diphosphate Delta Isomerase 1	Protein Coding	Q13907	53	GC10M001039	1.1975029706955	https://www.genecards.org/cgi-bin/carddisp.pl?gene=IDI1
MAGT1	Magnesium Transporter 1	Protein Coding	Q9H0U3	53	GC0XM078348	1.1975029706955	https://www.genecards.org/cgi-bin/carddisp.pl?gene=MAGT1
MAP4	Microtubule Associated Protein 4	Protein Coding	P27816	53	GC03M047850	1.1975029706955	https://www.genecards.org/cgi-bin/carddisp.pl?gene=MAP4
MPST	Mercaptopyruvate Sulfurtransferase	Protein Coding	P25325	53	GC22P037019	1.1975029706955	https://www.genecards.org/cgi-bin/carddisp.pl?gene=MPST
OLA1	Obg Like ATPase 1	Protein Coding	Q9NTK5	53	GC02M174072	1.1975029706955	https://www.genecards.org/cgi-bin/carddisp.pl?gene=OLA1
PARP4	Poly(ADP-Ribose) Polymerase Family Member 4	Protein Coding	Q9UKK3	53	GC13M024420	1.1975029706955	https://www.genecards.org/cgi-bin/carddisp.pl?gene=PARP4
RBFOX2	RNA Binding Fox-1 Homolog 2	Protein Coding	O43251	53	GC22M035738	1.1975029706955	https://www.genecards.org/cgi-bin/carddisp.pl?gene=RBFOX2
RPL34	Ribosomal Protein L34	Protein Coding	P49207	53	GC04P108620	1.1975029706955	https://www.genecards.org/cgi-bin/carddisp.pl?gene=RPL34
RPS13	Ribosomal Protein S13	Protein Coding	P62277	53	GC11M018194	1.1975029706955	https://www.genecards.org/cgi-bin/carddisp.pl?gene=RPS13
SNX3	Sorting Nexin 3	Protein Coding	O60493	53	GC06M108211	1.1975029706955	https://www.genecards.org/cgi-bin/carddisp.pl?gene=SNX3
TBCB	Tubulin Folding Cofactor B	Protein Coding	Q99426	53	GC19P161976	1.1975029706955	https://www.genecards.org/cgi-bin/carddisp.pl?gene=TBCB
TRDMT1	TRNA Aspartic Acid Methyltransferase 1	Protein Coding	O14717	53	GC10M017138	1.1975029706955	https://www.genecards.org/cgi-bin/carddisp.pl?gene=TRDMT1
ZMPSTE24	Zinc Metallopeptidase STE24	Protein Coding	O75844	53	GC01P040258	1.1975029706955	https://www.genecards.org/cgi-bin/carddisp.pl?gene=ZMPSTE24
ABCF2	ATP Binding Cassette Subfamily F Member 2	Protein Coding	Q9UG63	52	GC07M151211	1.1975029706955	https://www.genecards.org/cgi-bin/carddisp.pl?gene=ABCF2
AKAP8	A-Kinase Anchoring Protein 8	Protein Coding	O43823	52	GC19M112066	1.1975029706955	https://www.genecards.org/cgi-bin/carddisp.pl?gene=AKAP8
ATP1B3	ATPase Na+/K+ Transporting Subunit Beta 3	Protein Coding	P54709	52	GC03P141876	1.1975029706955	https://www.genecards.org/cgi-bin/carddisp.pl?gene=ATP1B3
CAP1	Cyclase Associated Actin Cytoskeleton Regulatory Protein 1	Protein Coding	Q01518	52	GC01P085237	1.1975029706955	https://www.genecards.org/cgi-bin/carddisp.pl?gene=CAP1
COPE	COPI Coat Complex Subunit Epsilon	Protein Coding	O14579	52	GC19M018899	1.1975029706955	https://www.genecards.org/cgi-bin/carddisp.pl?gene=COPE
LARP7	La Ribonucleoprotein 7, Transcriptional Regulator	Protein Coding	Q4G0J3	52	GC04P112842	1.1975029706955	https://www.genecards.org/cgi-bin/carddisp.pl?gene=LARP7
NCAPH	Non-SMC Condensin I Complex Subunit H	Protein Coding	Q15003	52	GC02P100840	1.1975029706955	https://www.genecards.org/cgi-bin/carddisp.pl?gene=NCAPH
NDUFAF3	NADH:Ubiquinone Oxidoreductase Complex Assembly Factor 3	Protein Coding	Q9BU61	52	GC03P049020	1.1975029706955	https://www.genecards.org/cgi-bin/carddisp.pl?gene=NDUFAF3
NFIC	Nuclear Factor I C	Protein Coding	P08651	52	GC19P003314	1.1975029706955	https://www.genecards.org/cgi-bin/carddisp.pl?gene=NFIC
PIGS	Phosphatidylinositol Glycan Anchor Biosynthesis Class S	Protein Coding	Q96S52	52	GC17M028553	1.1975029706955	https://www.genecards.org/cgi-bin/carddisp.pl?gene=PIGS
PIGT	Phosphatidylinositol Glycan Anchor Biosynthesis Class T	Protein Coding	Q969N2	52	GC20P045416	1.1975029706955	https://www.genecards.org/cgi-bin/carddisp.pl?gene=PIGT
PPA2	Inorganic Pyrophosphatase 2	Protein Coding	Q9H2U2	52	GC04M105369	1.1975029706955	https://www.genecards.org/cgi-bin/carddisp.pl?gene=PPA2
PTP4A1	Protein Tyrosine Phosphatase 4A1	Protein Coding	Q93096	52	GC06P191068	1.1975029706955	https://www.genecards.org/cgi-bin/carddisp.pl?gene=PTP4A1
RPA3	Replication Protein A3	Protein Coding	P35244	52	GC07M010035	1.1975029706955	https://www.genecards.org/cgi-bin/carddisp.pl?gene=RPA3
RPL13	Ribosomal Protein L13	Protein Coding	P26373	52	GC16P130833	1.1975029706955	https://www.genecards.org/cgi-bin/carddisp.pl?gene=RPL13
RPS11	Ribosomal Protein S11	Protein Coding	P62280	52	GC19P049496	1.1975029706955	https://www.genecards.org/cgi-bin/carddisp.pl?gene=RPS11
SYNCRIP	Synaptotagmin Binding Cytoplasmic RNA Interacting Protein	Protein Coding	O60506	52	GC06M085607	1.1975029706955	https://www.genecards.org/cgi-bin/carddisp.pl?gene=SYNCRIP
TOR1AIP1	Torsin 1A Interacting Protein 1	Protein Coding	Q5JTV8	52	GC01P179882	1.1975029706955	https://www.genecards.org/cgi-bin/carddisp.pl?gene=TOR1AIP1
TSN	Translin	Protein Coding	Q15631	52	GC02P121737	1.1975029706955	https://www.genecards.org/cgi-bin/carddisp.pl?gene=TSN
USP25	Ubiquitin Specific Peptidase 25	Protein Coding	Q9UHP3	52	GC21P021885	1.1975029706955	https://www.genecards.org/cgi-bin/carddisp.pl?gene=USP25
VGF	VGF Nerve Growth Factor Inducible	Protein Coding	O15240	52	GC07M101162	1.1975029706955	https://www.genecards.org/cgi-bin/carddisp.pl?gene=VGF
FUBP1	Far Upstream Element Binding Protein 1	Protein Coding	Q96AE4	51	GC01M077944	1.1975029706955	https://www.genecards.org/cgi-bin/carddisp.pl?gene=FUBP1
GRPEL1	GrpE Like 1, Mitochondrial	Protein Coding	Q9HAV7	51	GC04M007058	1.1975029706955	https://www.genecards.org/cgi-bin/carddisp.pl?gene=GRPEL1
HSPA13	Heat Shock Protein Family A (Hsp70) Member 13	Protein Coding	P48723	51	GC21M015817	1.1975029706955	https://www.genecards.org/cgi-bin/carddisp.pl?gene=HSPA13
PCMT1	Protein-L-Isoaspartate (D-Aspartate) O-Methyltransferase	Protein Coding	P22061	51	GC06P149749	1.1975029706955	https://www.genecards.org/cgi-bin/carddisp.pl?gene=PCMT1
PITPNB	Phosphatidylinositol Transfer Protein Beta	Protein Coding	P48739	51	GC22M027851	1.1975029706955	https://www.genecards.org/cgi-bin/carddisp.pl?gene=PITPNB
PSME3	Proteasome Activator Subunit 3	Protein Coding	P61289	51	GC17P042824	1.1975029706955	https://www.genecards.org/cgi-bin/carddisp.pl?gene=PSME3
S100A7	S100 Calcium Binding Protein A7	Protein Coding	P31151	51	GC01M153457	1.1975029706955	https://www.genecards.org/cgi-bin/carddisp.pl?gene=S100A7
STRAP	Serine/Threonine Kinase Receptor Associated Protein	Protein Coding	Q9Y3F4	51	GC12P015882	1.1975029706955	https://www.genecards.org/cgi-bin/carddisp.pl?gene=STRAP
TMEM165	Transmembrane Protein 165	Protein Coding	Q9HC07	51	GC04P055395	1.1975029706955	https://www.genecards.org/cgi-bin/carddisp.pl?gene=TMEM165
UBAP2L	Ubiquitin Associated Protein 2 Like	Protein Coding	Q14157	51	GC01P179973	1.1975029706955	https://www.genecards.org/cgi-bin/carddisp.pl?gene=UBAP2L
UQCR10	Ubiquinol-Cytochrome C Reductase, Complex III Subunit X	Protein Coding	Q9UDW1	51	GC22P029767	1.1975029706955	https://www.genecards.org/cgi-bin/carddisp.pl?gene=UQCR10
VPS45	Vacuolar Protein Sorting 45 Homolog	Protein Coding	Q9NRW7	51	GC01P179711	1.1975029706955	https://www.genecards.org/cgi-bin/carddisp.pl?gene=VPS45
ACBD3	Acyl-CoA Binding Domain Containing 3	Protein Coding	Q9H3P7	50	GC01M226144	1.1975029706955	https://www.genecards.org/cgi-bin/carddisp.pl?gene=ACBD3
ARFGAP1	ARF GTPase Activating Protein 1	Protein Coding	Q8N6T3	50	GC20P063272	1.1975029706955	https://www.genecards.org/cgi-bin/carddisp.pl?gene=ARFGAP1
BYSL	Bystin Like	Protein Coding	Q13895	50	GC06P190870	1.1975029706955	https://www.genecards.org/cgi-bin/carddisp.pl?gene=BYSL
DAD1	Defender Against Cell Death 1	Protein Coding	P61803	50	GC14M029185	1.1975029706955	https://www.genecards.org/cgi-bin/carddisp.pl?gene=DAD1
DNAJA3	DnaJ Heat Shock Protein Family (Hsp40) Member A3	Protein Coding	Q96EY1	50	GC16P004425	1.1975029706955	https://www.genecards.org/cgi-bin/carddisp.pl?gene=DNAJA3
DPH5	Diphthamide Biosynthesis 5	Protein Coding	Q9H2P9	50	GC01M100989	1.1975029706955	https://www.genecards.org/cgi-bin/carddisp.pl?gene=DPH5
DUSP9	Dual Specificity Phosphatase 9	Protein Coding	Q99956	50	GC0XP153642	1.1975029706955	https://www.genecards.org/cgi-bin/carddisp.pl?gene=DUSP9
EIF4G2	Eukaryotic Translation Initiation Factor 4 Gamma 2	Protein Coding	P78344	50	GC11M016173	1.1975029706955	https://www.genecards.org/cgi-bin/carddisp.pl?gene=EIF4G2
EOGT	EGF Domain Specific O-Linked N-Acetylglucosamine Transferase	Protein Coding	Q5NDL2	50	GC03M068975	1.1975029706955	https://www.genecards.org/cgi-bin/carddisp.pl?gene=EOGT
IST1	IST1 Factor Associated With ESCRT-III	Protein Coding	P53990	50	GC16P129973	1.1975029706955	https://www.genecards.org/cgi-bin/carddisp.pl?gene=IST1
MAP7	Microtubule Associated Protein 7	Protein Coding	Q14244	50	GC06M136342	1.1975029706955	https://www.genecards.org/cgi-bin/carddisp.pl?gene=MAP7
MBOAT7	Membrane Bound Acylglycerophosphatidylinositol O-Acyltransferase MBOAT7	Protein Coding	Q96N66	50	GC19M054173	1.1975029706955	https://www.genecards.org/cgi-bin/carddisp.pl?gene=MBOAT7
MRPL39	Mitochondrial Ribosomal Protein L39	Protein Coding	Q9NYK5	50	GC21M025585	1.1975029706955	https://www.genecards.org/cgi-bin/carddisp.pl?gene=MRPL39
POP1	POP1 Homolog, Ribonuclease P/MRP Subunit	Protein Coding	Q99575	50	GC08P098117	1.1975029706955	https://www.genecards.org/cgi-bin/carddisp.pl?gene=POP1
PREB	Prolactin Regulatory Element Binding	Protein Coding	Q9HCU5	50	GC02M027130	1.1975029706955	https://www.genecards.org/cgi-bin/carddisp.pl?gene=PREB
PSMD5	Proteasome 26S Subunit, Non-ATPase 5	Protein Coding	Q16401	50	GC09M120815	1.1975029706955	https://www.genecards.org/cgi-bin/carddisp.pl?gene=PSMD5
RAB1B	RAB1B, Member RAS Oncogene Family	Protein Coding	Q9H0U4	50	GC11P115108	1.1975029706955	https://www.genecards.org/cgi-bin/carddisp.pl?gene=RAB1B
RAB39B	RAB39B, Member RAS Oncogene Family	Protein Coding	Q96DA2	50	GC0XM155259	1.1975029706955	https://www.genecards.org/cgi-bin/carddisp.pl?gene=RAB39B
RCN2	Reticulocalbin 2	Protein Coding	Q14257	50	GC15P076931	1.1975029706955	https://www.genecards.org/cgi-bin/carddisp.pl?gene=RCN2
RHOT2	Ras Homolog Family Member T2	Protein Coding	Q8IXI1	50	GC16P127998	1.1975029706955	https://www.genecards.org/cgi-bin/carddisp.pl?gene=RHOT2
RIF1	Replication Timing Regulatory Factor 1	Protein Coding	Q5UIP0	50	GC02P151409	1.1975029706955	https://www.genecards.org/cgi-bin/carddisp.pl?gene=RIF1
RPL30	Ribosomal Protein L30	Protein Coding	P62888	50	GC08M098024	1.1975029706955	https://www.genecards.org/cgi-bin/carddisp.pl?gene=RPL30
RPS15	Ribosomal Protein S15	Protein Coding	P62841	50	GC19P001438	1.1975029706955	https://www.genecards.org/cgi-bin/carddisp.pl?gene=RPS15
TNK1	Tyrosine Kinase Non Receptor 1	Protein Coding	Q13470	50	GC17P007380	1.1975029706955	https://www.genecards.org/cgi-bin/carddisp.pl?gene=TNK1
TOMM70	Translocase Of Outer Mitochondrial Membrane 70	Protein Coding	O94826	50	GC03M100364	1.1975029706955	https://www.genecards.org/cgi-bin/carddisp.pl?gene=TOMM70
AP3M1	Adaptor Related Protein Complex 3 Subunit Mu 1	Protein Coding	Q9Y2T2	49	GC10M074120	1.1975029706955	https://www.genecards.org/cgi-bin/carddisp.pl?gene=AP3M1
ARFGAP2	ARF GTPase Activating Protein 2	Protein Coding	Q8N6H7	49	GC11M142647	1.1975029706955	https://www.genecards.org/cgi-bin/carddisp.pl?gene=ARFGAP2
BRAT1	BRCA1 Associated ATM Activator 1	Protein Coding	Q6PJG6	49	GC07M004141	1.1975029706955	https://www.genecards.org/cgi-bin/carddisp.pl?gene=BRAT1
CACYBP	Calcyclin Binding Protein	Protein Coding	Q9HB71	49	GC01P180792	1.1975029706955	https://www.genecards.org/cgi-bin/carddisp.pl?gene=CACYBP
FOXD3	Forkhead Box D3	Protein Coding	Q9UJU5	49	GC01P086399	1.1975029706955	https://www.genecards.org/cgi-bin/carddisp.pl?gene=FOXD3
GLT8D1	Glycosyltransferase 8 Domain Containing 1	Protein Coding	Q68CQ7	49	GC03M052694	1.1975029706955	https://www.genecards.org/cgi-bin/carddisp.pl?gene=GLT8D1
HNRNPAB	Heterogeneous Nuclear Ribonucleoprotein A/B	Protein Coding	Q99729	49	GC05P178204	1.1975029706955	https://www.genecards.org/cgi-bin/carddisp.pl?gene=HNRNPAB
KATNAL2	Katanin Catalytic Subunit A1 Like 2	Protein Coding	Q8IYT4	49	GC18P046917	1.1975029706955	https://www.genecards.org/cgi-bin/carddisp.pl?gene=KATNAL2
KCTD12	Potassium Channel Tetramerization Domain Containing 12	Protein Coding	Q96CX2	49	GC13M076880	1.1975029706955	https://www.genecards.org/cgi-bin/carddisp.pl?gene=KCTD12
NCEH1	Neutral Cholesterol Ester Hydrolase 1	Protein Coding	Q6PIU2	49	GC03M172630	1.1975029706955	https://www.genecards.org/cgi-bin/carddisp.pl?gene=NCEH1
RPS18	Ribosomal Protein S18	Protein Coding	P62269	49	GC06P190764	1.1975029706955	https://www.genecards.org/cgi-bin/carddisp.pl?gene=RPS18
RPS21	Ribosomal Protein S21	Protein Coding	P63220	49	GC20P062387	1.1975029706955	https://www.genecards.org/cgi-bin/carddisp.pl?gene=RPS21
SFXN1	Sideroflexin 1	Protein Coding	Q9H9B4	49	GC05P175477	1.1975029706955	https://www.genecards.org/cgi-bin/carddisp.pl?gene=SFXN1
SRRM1	Serine And Arginine Repetitive Matrix 1	Protein Coding	Q8IYB3	49	GC01P024631	1.1975029706955	https://www.genecards.org/cgi-bin/carddisp.pl?gene=SRRM1
STAU2	Staufen Double-Stranded RNA Binding Protein 2	Protein Coding	Q9NUL3	49	GC08M073421	1.1975029706955	https://www.genecards.org/cgi-bin/carddisp.pl?gene=STAU2
SUB1	SUB1 Regulator Of Transcription	Protein Coding	P53999	49	GC05P033852	1.1975029706955	https://www.genecards.org/cgi-bin/carddisp.pl?gene=SUB1
TMCO1	Transmembrane And Coiled-Coil Domains 1	Protein Coding	Q9UM00	49	GC01M165724	1.1975029706955	https://www.genecards.org/cgi-bin/carddisp.pl?gene=TMCO1
HTATSF1	HIV-1 Tat Specific Factor 1	Protein Coding	O43719	48	GC0XP136497	1.1975029706955	https://www.genecards.org/cgi-bin/carddisp.pl?gene=HTATSF1
MRPL11	Mitochondrial Ribosomal Protein L11	Protein Coding	Q9Y3B7	48	GC11M143034	1.1975029706955	https://www.genecards.org/cgi-bin/carddisp.pl?gene=MRPL11
SRPRA	SRP Receptor Subunit Alpha	Protein Coding	P08240	48	GC11M143993	1.1975029706955	https://www.genecards.org/cgi-bin/carddisp.pl?gene=SRPRA
TOR3A	Torsin Family 3 Member A	Protein Coding	Q9H497	48	GC01P180899	1.1975029706955	https://www.genecards.org/cgi-bin/carddisp.pl?gene=TOR3A
YTHDF3	YTH N6-Methyladenosine RNA Binding Protein F3	Protein Coding	Q7Z739	48	GC08P063168	1.1975029706955	https://www.genecards.org/cgi-bin/carddisp.pl?gene=YTHDF3
ARL8B	ARF Like GTPase 8B	Protein Coding	Q9NVJ2	47	GC03P005122	1.1975029706955	https://www.genecards.org/cgi-bin/carddisp.pl?gene=ARL8B
EPM2AIP1	EPM2A Interacting Protein 1	Protein Coding	Q7L775	47	GC03M037194	1.1975029706955	https://www.genecards.org/cgi-bin/carddisp.pl?gene=EPM2AIP1
RAB21	RAB21, Member RAS Oncogene Family	Protein Coding	Q9UL25	47	GC12P071754	1.1975029706955	https://www.genecards.org/cgi-bin/carddisp.pl?gene=RAB21
SLIRP	SRA Stem-Loop Interacting RNA Binding Protein	Protein Coding	Q9GZT3	47	GC14P077708	1.1975029706955	https://www.genecards.org/cgi-bin/carddisp.pl?gene=SLIRP
TRIM68	Tripartite Motif Containing 68	Protein Coding	Q6AZZ1	47	GC11M004598	1.1975029706955	https://www.genecards.org/cgi-bin/carddisp.pl?gene=TRIM68
VMP1	Vacuole Membrane Protein 1	Protein Coding	Q96GC9	47	GC17P059707	1.1975029706955	https://www.genecards.org/cgi-bin/carddisp.pl?gene=VMP1
BOP1	BOP1 Ribosomal Biogenesis Factor	Protein Coding	Q14137	46	GC08M144262	1.1975029706955	https://www.genecards.org/cgi-bin/carddisp.pl?gene=BOP1
BPNT1	3'(2'), 5'-Bisphosphate Nucleotidase 1	Protein Coding	O95861	46	GC01M220057	1.1975029706955	https://www.genecards.org/cgi-bin/carddisp.pl?gene=BPNT1
GNPDA1	Glucosamine-6-Phosphate Deaminase 1	Protein Coding	P46926	46	GC05M141991	1.1975029706955	https://www.genecards.org/cgi-bin/carddisp.pl?gene=GNPDA1
H1-3	H1.3 Linker Histone, Cluster Member	Protein Coding	P16402	46	GC06M113005	1.1975029706955	https://www.genecards.org/cgi-bin/carddisp.pl?gene=H1-3
MRPL19	Mitochondrial Ribosomal Protein L19	Protein Coding	P49406	46	GC02P075646	1.1975029706955	https://www.genecards.org/cgi-bin/carddisp.pl?gene=MRPL19
MRPL2	Mitochondrial Ribosomal Protein L2	Protein Coding	Q5T653	46	GC06M043054	1.1975029706955	https://www.genecards.org/cgi-bin/carddisp.pl?gene=MRPL2
NCLN	Nicalin	Protein Coding	Q969V3	46	GC19P003185	1.1975029706955	https://www.genecards.org/cgi-bin/carddisp.pl?gene=NCLN
NTPCR	Nucleoside-Triphosphatase, Cancer-Related	Protein Coding	Q9BSD7	46	GC01P232950	1.1975029706955	https://www.genecards.org/cgi-bin/carddisp.pl?gene=NTPCR
SCAMP3	Secretory Carrier Membrane Protein 3	Protein Coding	O14828	46	GC01M155255	1.1975029706955	https://www.genecards.org/cgi-bin/carddisp.pl?gene=SCAMP3
SNRNP40	Small Nuclear Ribonucleoprotein U5 Subunit 40	Protein Coding	Q96DI7	46	GC01M031259	1.1975029706955	https://www.genecards.org/cgi-bin/carddisp.pl?gene=SNRNP40
STX18	Syntaxin 18	Protein Coding	Q9P2W9	46	GC04M006856	1.1975029706955	https://www.genecards.org/cgi-bin/carddisp.pl?gene=STX18
TCF25	TCF25 Ribosome Quality Control Complex Subunit	Protein Coding	Q9BQ70	46	GC16P089873	1.1975029706955	https://www.genecards.org/cgi-bin/carddisp.pl?gene=TCF25
TIMM13	Translocase Of Inner Mitochondrial Membrane 13	Protein Coding	Q9Y5L4	46	GC19M002425	1.1975029706955	https://www.genecards.org/cgi-bin/carddisp.pl?gene=TIMM13
TOR1AIP2	Torsin 1A Interacting Protein 2	Protein Coding	Q9H496	46	GC01M187117	1.1975029706955	https://www.genecards.org/cgi-bin/carddisp.pl?gene=TOR1AIP2
TRIM47	Tripartite Motif Containing 47	Protein Coding	Q96LD4	46	GC17M075874	1.1975029706955	https://www.genecards.org/cgi-bin/carddisp.pl?gene=TRIM47
TXNDC17	Thioredoxin Domain Containing 17	Protein Coding	Q9BRA2	46	GC17P006640	1.1975029706955	https://www.genecards.org/cgi-bin/carddisp.pl?gene=TXNDC17
CDC42EP1	CDC42 Effector Protein 1	Protein Coding	Q00587	45	GC22P097334	1.1975029706955	https://www.genecards.org/cgi-bin/carddisp.pl?gene=CDC42EP1
ERGIC2	ERGIC And Golgi 2	Protein Coding	Q96RQ1	45	GC12M029337	1.1975029706955	https://www.genecards.org/cgi-bin/carddisp.pl?gene=ERGIC2
IKBIP	IKBKB Interacting Protein	Protein Coding	Q70UQ0	45	GC12M098613	1.1975029706955	https://www.genecards.org/cgi-bin/carddisp.pl?gene=IKBIP
MLF2	Myeloid Leukemia Factor 2	Protein Coding	Q15773	45	GC12M036912	1.1975029706955	https://www.genecards.org/cgi-bin/carddisp.pl?gene=MLF2
SRP14	Signal Recognition Particle 14	Protein Coding	P37108	45	GC15M040035	1.1975029706955	https://www.genecards.org/cgi-bin/carddisp.pl?gene=SRP14
XXYLT1	Xyloside Xylosyltransferase 1	Protein Coding	Q8NBI6	45	GC03M195068	1.1975029706955	https://www.genecards.org/cgi-bin/carddisp.pl?gene=XXYLT1
KRT23	Keratin 23	Protein Coding	Q9C075	44	GC17M040922	1.1975029706955	https://www.genecards.org/cgi-bin/carddisp.pl?gene=KRT23
LTV1	LTV1 Ribosome Biogenesis Factor	Protein Coding	Q96GA3	44	GC06P143843	1.1975029706955	https://www.genecards.org/cgi-bin/carddisp.pl?gene=LTV1
PAQR3	Progestin And AdipoQ Receptor Family Member 3	Protein Coding	Q6TCH7	44	GC04M078887	1.1975029706955	https://www.genecards.org/cgi-bin/carddisp.pl?gene=PAQR3
PPP4R3A	Protein Phosphatase 4 Regulatory Subunit 3A	Protein Coding	Q6IN85	44	GC14M125321	1.1975029706955	https://www.genecards.org/cgi-bin/carddisp.pl?gene=PPP4R3A
PRRC2C	Proline Rich Coiled-Coil 2C	Protein Coding	Q9Y520	44	GC01P180684	1.1975029706955	https://www.genecards.org/cgi-bin/carddisp.pl?gene=PRRC2C
RETSAT	Retinol Saturase	Protein Coding	Q6NUM9	44	GC02M085344	1.1975029706955	https://www.genecards.org/cgi-bin/carddisp.pl?gene=RETSAT
SPCS2	Signal Peptidase Complex Subunit 2	Protein Coding	Q15005	44	GC11P115468	1.1975029706955	https://www.genecards.org/cgi-bin/carddisp.pl?gene=SPCS2
STYXL1	Serine/Threonine/Tyrosine Interacting Like 1	Protein Coding	Q9Y6J8	44	GC07M075996	1.1975029706955	https://www.genecards.org/cgi-bin/carddisp.pl?gene=STYXL1
USP39	Ubiquitin Specific Peptidase 39	Protein Coding	Q53GS9	44	GC02P100390	1.1975029706955	https://www.genecards.org/cgi-bin/carddisp.pl?gene=USP39
BBIP1	BBSome Interacting Protein 1	Protein Coding	A8MTZ0	43	GC10M110898	1.1975029706955	https://www.genecards.org/cgi-bin/carddisp.pl?gene=BBIP1
HACD3	3-Hydroxyacyl-CoA Dehydratase 3	Protein Coding	Q9P035	43	GC15P065530	1.1975029706955	https://www.genecards.org/cgi-bin/carddisp.pl?gene=HACD3
RRS1	Ribosome Biogenesis Regulator 1 Homolog	Protein Coding	Q15050	43	GC08P066429	1.1975029706955	https://www.genecards.org/cgi-bin/carddisp.pl?gene=RRS1
SACM1L	SAC1 Like Phosphatidylinositide Phosphatase	Protein Coding	Q9NTJ5	43	GC03P066691	1.1975029706955	https://www.genecards.org/cgi-bin/carddisp.pl?gene=SACM1L
SRP9	Signal Recognition Particle 9	Protein Coding	P49458	43	GC01P225777	1.1975029706955	https://www.genecards.org/cgi-bin/carddisp.pl?gene=SRP9
U2SURP	U2 SnRNP Associated SURP Domain Containing	Protein Coding	O15042	43	GC03P142964	1.1975029706955	https://www.genecards.org/cgi-bin/carddisp.pl?gene=U2SURP
ZDHHC1	ZDHHC Palmitoyltransferase 1	Protein Coding	Q8WTX9	43	GC16M067394	1.1975029706955	https://www.genecards.org/cgi-bin/carddisp.pl?gene=ZDHHC1
ZNF622	Zinc Finger Protein 622	Protein Coding	Q969S3	43	GC05M016451	1.1975029706955	https://www.genecards.org/cgi-bin/carddisp.pl?gene=ZNF622
FOXS1	Forkhead Box S1	Protein Coding	O43638	42	GC20M031844	1.1975029706955	https://www.genecards.org/cgi-bin/carddisp.pl?gene=FOXS1
GOLT1B	Golgi Transport 1B	Protein Coding	Q9Y3E0	42	GC12P021501	1.1975029706955	https://www.genecards.org/cgi-bin/carddisp.pl?gene=GOLT1B
PABPC4L	Poly(A) Binding Protein Cytoplasmic 4 Like	Protein Coding	P0CB38	42	GC04M133948	1.1975029706955	https://www.genecards.org/cgi-bin/carddisp.pl?gene=PABPC4L
SCCPDH	Saccharopine Dehydrogenase (Putative)	Protein Coding	Q8NBX0	42	GC01P246724	1.1975029706955	https://www.genecards.org/cgi-bin/carddisp.pl?gene=SCCPDH
SLC35E1	Solute Carrier Family 35 Member E1	Protein Coding	Q96K37	42	GC19M016549	1.1975029706955	https://www.genecards.org/cgi-bin/carddisp.pl?gene=SLC35E1
QPCTL	Glutaminyl-Peptide Cyclotransferase Like	Protein Coding	Q9NXS2	41	GC19P045692	1.1975029706955	https://www.genecards.org/cgi-bin/carddisp.pl?gene=QPCTL
GLT8D2	Glycosyltransferase 8 Domain Containing 2	Protein Coding	Q9H1C3	40	GC12M103988	1.1975029706955	https://www.genecards.org/cgi-bin/carddisp.pl?gene=GLT8D2
MCMBP	Minichromosome Maintenance Complex Binding Protein	Protein Coding	Q9BTE3	40	GC10M119829	1.1975029706955	https://www.genecards.org/cgi-bin/carddisp.pl?gene=MCMBP
PCNP	PEST Proteolytic Signal Containing Nuclear Protein	Protein Coding	Q8WW12	39	GC03P101574	1.1975029706955	https://www.genecards.org/cgi-bin/carddisp.pl?gene=PCNP
TTC27	Tetratricopeptide Repeat Domain 27	Protein Coding	Q6P3X3	39	GC02P032628	1.1975029706955	https://www.genecards.org/cgi-bin/carddisp.pl?gene=TTC27
POM121C	POM121 Transmembrane Nucleoporin C	Protein Coding	A8CG34	37	GC07M075416	1.1975029706955	https://www.genecards.org/cgi-bin/carddisp.pl?gene=POM121C
NME1-NME2	NME1-NME2 Readthrough	Protein Coding		33	GC17P051153	1.1975029706955	https://www.genecards.org/cgi-bin/carddisp.pl?gene=NME1-NME2
LINC00173	Long Intergenic Non-Protein Coding RNA 173	RNA Gene	Q6ZV60	30	GC12P116533	1.1975029706955	https://www.genecards.org/cgi-bin/carddisp.pl?gene=LINC00173
MIR126	MicroRNA 126	RNA Gene		30	GC09P136670	1.1975029706955	https://www.genecards.org/cgi-bin/carddisp.pl?gene=MIR126
SLC35B1	Solute Carrier Family 35 Member B1	Protein Coding	P78383	45	GC17M049700	1.17303562164307	https://www.genecards.org/cgi-bin/carddisp.pl?gene=SLC35B1
LCK	LCK Proto-Oncogene, Src Family Tyrosine Kinase	Protein Coding	P06239	65	GC01P032251	1.14060044288635	https://www.genecards.org/cgi-bin/carddisp.pl?gene=LCK
CD40	CD40 Molecule	Protein Coding	P25942	63	GC20P046118	1.14060044288635	https://www.genecards.org/cgi-bin/carddisp.pl?gene=CD40
RARA	Retinoic Acid Receptor Alpha	Protein Coding	P10276	63	GC17P040309	1.14060044288635	https://www.genecards.org/cgi-bin/carddisp.pl?gene=RARA
SLC12A5	Solute Carrier Family 12 Member 5	Protein Coding	Q9H2X9	61	GC20P046021	1.14060044288635	https://www.genecards.org/cgi-bin/carddisp.pl?gene=SLC12A5
PML	PML Nuclear Body Scaffold	Protein Coding	P29590	59	GC15P073994	1.14060044288635	https://www.genecards.org/cgi-bin/carddisp.pl?gene=PML
LYZ	Lysozyme	Protein Coding	P61626	58	GC12P069348	1.14060044288635	https://www.genecards.org/cgi-bin/carddisp.pl?gene=LYZ
TP63	Tumor Protein P63	Protein Coding	Q9H3D4	58	GC03P189598	1.14060044288635	https://www.genecards.org/cgi-bin/carddisp.pl?gene=TP63
AKR1C2	Aldo-Keto Reductase Family 1 Member C2	Protein Coding	P52895	57	GC10M004987	1.14060044288635	https://www.genecards.org/cgi-bin/carddisp.pl?gene=AKR1C2
AKR1C3	Aldo-Keto Reductase Family 1 Member C3	Protein Coding	P42330	57	GC10P005035	1.14060044288635	https://www.genecards.org/cgi-bin/carddisp.pl?gene=AKR1C3
GAD2	Glutamate Decarboxylase 2	Protein Coding	Q05329	57	GC10P026216	1.14060044288635	https://www.genecards.org/cgi-bin/carddisp.pl?gene=GAD2
SQLE	Squalene Epoxidase	Protein Coding	Q14534	57	GC08P124998	1.14060044288635	https://www.genecards.org/cgi-bin/carddisp.pl?gene=SQLE
AKR1C1	Aldo-Keto Reductase Family 1 Member C1	Protein Coding	Q04828	56	GC10P004963	1.14060044288635	https://www.genecards.org/cgi-bin/carddisp.pl?gene=AKR1C1
CNP	2'',3''-Cyclic Nucleotide 3'' Phosphodiesterase	Protein Coding	P09543	56	GC17P041966	1.14060044288635	https://www.genecards.org/cgi-bin/carddisp.pl?gene=CNP
HPN	Hepsin	Protein Coding	P05981	55	GC19P035040	1.14060044288635	https://www.genecards.org/cgi-bin/carddisp.pl?gene=HPN
SHBG	Sex Hormone Binding Globulin	Protein Coding	P04278	55	GC17P007613	1.14060044288635	https://www.genecards.org/cgi-bin/carddisp.pl?gene=SHBG
TREH	Trehalase	Protein Coding	O43280	55	GC11M118657	1.14060044288635	https://www.genecards.org/cgi-bin/carddisp.pl?gene=TREH
ATG9A	Autophagy Related 9A	Protein Coding	Q7Z3C6	53	GC02M219219	1.14060044288635	https://www.genecards.org/cgi-bin/carddisp.pl?gene=ATG9A
FBXO32	F-Box Protein 32	Protein Coding	Q969P5	53	GC08M123652	1.14060044288635	https://www.genecards.org/cgi-bin/carddisp.pl?gene=FBXO32
MAGI1	Membrane Associated Guanylate Kinase, WW And PDZ Domain Containing 1	Protein Coding	Q96QZ7	53	GC03M065330	1.14060044288635	https://www.genecards.org/cgi-bin/carddisp.pl?gene=MAGI1
SLC30A2	Solute Carrier Family 30 Member 2	Protein Coding	Q9BRI3	53	GC01M036995	1.14060044288635	https://www.genecards.org/cgi-bin/carddisp.pl?gene=SLC30A2
CCNF	Cyclin F	Protein Coding	P41002	52	GC16P002429	1.14060044288635	https://www.genecards.org/cgi-bin/carddisp.pl?gene=CCNF
HSPA6	Heat Shock Protein Family A (Hsp70) Member 6	Protein Coding	P17066	51	GC01P161524	1.14060044288635	https://www.genecards.org/cgi-bin/carddisp.pl?gene=HSPA6
PSMG2	Proteasome Assembly Chaperone 2	Protein Coding	Q969U7	50	GC18P026118	1.14060044288635	https://www.genecards.org/cgi-bin/carddisp.pl?gene=PSMG2
TMPRSS11D	Transmembrane Serine Protease 11D	Protein Coding	O60235	50	GC04M067820	1.14060044288635	https://www.genecards.org/cgi-bin/carddisp.pl?gene=TMPRSS11D
PSMG1	Proteasome Assembly Chaperone 1	Protein Coding	O95456	49	GC21M039174	1.14060044288635	https://www.genecards.org/cgi-bin/carddisp.pl?gene=PSMG1
USP12	Ubiquitin Specific Peptidase 12	Protein Coding	O75317	48	GC13M027066	1.14060044288635	https://www.genecards.org/cgi-bin/carddisp.pl?gene=USP12
SRXN1	Sulfiredoxin 1	Protein Coding	Q9BYN0	47	GC20M000719	1.14060044288635	https://www.genecards.org/cgi-bin/carddisp.pl?gene=SRXN1
RHBDF1	Rhomboid 5 Homolog 1	Protein Coding	Q96CC6	46	GC16M000058	1.14060044288635	https://www.genecards.org/cgi-bin/carddisp.pl?gene=RHBDF1
PLP2	Proteolipid Protein 2	Protein Coding	Q04941	45	GC0XP049171	1.14060044288635	https://www.genecards.org/cgi-bin/carddisp.pl?gene=PLP2
PRIMA1	Proline Rich Membrane Anchor 1	Protein Coding	Q86XR5	45	GC14M093718	1.14060044288635	https://www.genecards.org/cgi-bin/carddisp.pl?gene=PRIMA1
PPP4R1	Protein Phosphatase 4 Regulatory Subunit 1	Protein Coding	Q8TF05	44	GC18M009546	1.14060044288635	https://www.genecards.org/cgi-bin/carddisp.pl?gene=PPP4R1
RTCA	RNA 3'-Terminal Phosphate Cyclase	Protein Coding	O00442	42	GC01P100266	1.14060044288635	https://www.genecards.org/cgi-bin/carddisp.pl?gene=RTCA
FOXJ2	Forkhead Box J2	Protein Coding	Q9P0K8	41	GC12P008032	1.14060044288635	https://www.genecards.org/cgi-bin/carddisp.pl?gene=FOXJ2
ATXN8OS	ATXN8 Opposite Strand LncRNA	RNA Gene	P0DMR3	33	GC13P070107	1.14060044288635	https://www.genecards.org/cgi-bin/carddisp.pl?gene=ATXN8OS
MIR143	MicroRNA 143	RNA Gene		31	GC05P161156	1.14060044288635	https://www.genecards.org/cgi-bin/carddisp.pl?gene=MIR143
MIR197	MicroRNA 197	RNA Gene		28	GC01P109598	1.14060044288635	https://www.genecards.org/cgi-bin/carddisp.pl?gene=MIR197
MIR17	MicroRNA 17	RNA Gene		27	GC13P091350	1.14060044288635	https://www.genecards.org/cgi-bin/carddisp.pl?gene=MIR17
SNORD56	Small Nucleolar RNA, C/D Box 56	RNA Gene		23	GC20P011629	1.14060044288635	https://www.genecards.org/cgi-bin/carddisp.pl?gene=SNORD56
SNORD57	Small Nucleolar RNA, C/D Box 57	RNA Gene		17	GC20P011634	1.14060044288635	https://www.genecards.org/cgi-bin/carddisp.pl?gene=SNORD57
VMA21	Vacuolar ATPase Assembly Factor VMA21	Protein Coding	Q3ZAQ7	47	GC0XP151396	1.0681619644165	https://www.genecards.org/cgi-bin/carddisp.pl?gene=VMA21
ALK	ALK Receptor Tyrosine Kinase	Protein Coding	Q9UM73	64	GC02M029389	1.06644356250763	https://www.genecards.org/cgi-bin/carddisp.pl?gene=ALK
PPP3CA	Protein Phosphatase 3 Catalytic Subunit Alpha	Protein Coding	Q08209	63	GC04M101024	1.06644356250763	https://www.genecards.org/cgi-bin/carddisp.pl?gene=PPP3CA
TF	Transferrin	Protein Coding	P02787	63	GC03P144248	1.06644356250763	https://www.genecards.org/cgi-bin/carddisp.pl?gene=TF
CSPG4	Chondroitin Sulfate Proteoglycan 4	Protein Coding	Q6UVK1	60	GC15M075674	1.06644356250763	https://www.genecards.org/cgi-bin/carddisp.pl?gene=CSPG4
CTSC	Cathepsin C	Protein Coding	P53634	60	GC11M143465	1.06644356250763	https://www.genecards.org/cgi-bin/carddisp.pl?gene=CTSC
DGAT1	Diacylglycerol O-Acyltransferase 1	Protein Coding	O75907	60	GC08M147584	1.06644356250763	https://www.genecards.org/cgi-bin/carddisp.pl?gene=DGAT1
SNTA1	Syntrophin Alpha 1	Protein Coding	Q13424	59	GC20M033407	1.06644356250763	https://www.genecards.org/cgi-bin/carddisp.pl?gene=SNTA1
TWIST1	Twist Family BHLH Transcription Factor 1	Protein Coding	Q15672	59	GC07M019020	1.06644356250763	https://www.genecards.org/cgi-bin/carddisp.pl?gene=TWIST1
ORAI1	ORAI Calcium Release-Activated Calcium Modulator 1	Protein Coding	Q96D31	57	GC12P140363	1.06644356250763	https://www.genecards.org/cgi-bin/carddisp.pl?gene=ORAI1
PPP3CB	Protein Phosphatase 3 Catalytic Subunit Beta	Protein Coding	P16298	57	GC10M073436	1.06644356250763	https://www.genecards.org/cgi-bin/carddisp.pl?gene=PPP3CB
GZMA	Granzyme A	Protein Coding	P12544	55	GC05P055102	1.06644356250763	https://www.genecards.org/cgi-bin/carddisp.pl?gene=GZMA
TRPC1	Transient Receptor Potential Cation Channel Subfamily C Member 1	Protein Coding	P48995	53	GC03P142724	1.06644356250763	https://www.genecards.org/cgi-bin/carddisp.pl?gene=TRPC1
DSG4	Desmoglein 4	Protein Coding	Q86SJ6	52	GC18P031377	1.06644356250763	https://www.genecards.org/cgi-bin/carddisp.pl?gene=DSG4
CLIC4	Chloride Intracellular Channel 4	Protein Coding	Q9Y696	51	GC01P024745	1.06644356250763	https://www.genecards.org/cgi-bin/carddisp.pl?gene=CLIC4
GDF10	Growth Differentiation Factor 10	Protein Coding	P55107	51	GC10P047300	1.06644356250763	https://www.genecards.org/cgi-bin/carddisp.pl?gene=GDF10
KDELR2	KDEL Endoplasmic Reticulum Protein Retention Receptor 2	Protein Coding	P33947	49	GC07M006447	1.06644356250763	https://www.genecards.org/cgi-bin/carddisp.pl?gene=KDELR2
ETV2	ETS Variant Transcription Factor 2	Protein Coding	O00321	46	GC19P161957	1.06644356250763	https://www.genecards.org/cgi-bin/carddisp.pl?gene=ETV2
MIR17HG	MiR-17-92a-1 Cluster Host Gene	RNA Gene	Q75NE6	34	GC13P091347	1.06644356250763	https://www.genecards.org/cgi-bin/carddisp.pl?gene=MIR17HG
MIR149	MicroRNA 149	RNA Gene		31	GC02P240456	1.06644356250763	https://www.genecards.org/cgi-bin/carddisp.pl?gene=MIR149
MIR184	MicroRNA 184	RNA Gene		30	GC15P079209	1.06644356250763	https://www.genecards.org/cgi-bin/carddisp.pl?gene=MIR184
MIR18A	MicroRNA 18a	RNA Gene		27	GC13P091764	1.06644356250763	https://www.genecards.org/cgi-bin/carddisp.pl?gene=MIR18A
MIR215	MicroRNA 215	RNA Gene		27	GC01M220117	1.06644356250763	https://www.genecards.org/cgi-bin/carddisp.pl?gene=MIR215
TRP-AGG2-6	TRNA-Pro (Anticodon AGG) 2-6	RNA Gene		14	GC14M029112	1.06644356250763	https://www.genecards.org/cgi-bin/carddisp.pl?gene=TRP-AGG2-6
HSPA4	Heat Shock Protein Family A (Hsp70) Member 4	Protein Coding	P34932	56	GC05P133148	1.0591584444046	https://www.genecards.org/cgi-bin/carddisp.pl?gene=HSPA4
TTF2	Transcription Termination Factor 2	Protein Coding	Q9UNY4	52	GC01P117060	1.0591584444046	https://www.genecards.org/cgi-bin/carddisp.pl?gene=TTF2
INS-IGF2	INS-IGF2 Readthrough	Protein Coding	F8WCM5	38	GC11M015860	1.0591584444046	https://www.genecards.org/cgi-bin/carddisp.pl?gene=INS-IGF2
MOGS	Mannosyl-Oligosaccharide Glucosidase	Protein Coding	Q13724	56	GC02M074461	1.04026556015015	https://www.genecards.org/cgi-bin/carddisp.pl?gene=MOGS
CPA1	Carboxypeptidase A1	Protein Coding	P15085	57	GC07P130380	0.996799349784851	https://www.genecards.org/cgi-bin/carddisp.pl?gene=CPA1
AGR2	Anterior Gradient 2, Protein Disulphide Isomerase Family Member	Protein Coding	O95994	52	GC07M017630	0.964108467102051	https://www.genecards.org/cgi-bin/carddisp.pl?gene=AGR2
SFTPC	Surfactant Protein C	Protein Coding	P11686	52	GC08P022156	0.964108467102051	https://www.genecards.org/cgi-bin/carddisp.pl?gene=SFTPC
TLR2	Toll Like Receptor 2	Protein Coding	O60603	64	GC04P153684	0.947340130805969	https://www.genecards.org/cgi-bin/carddisp.pl?gene=TLR2
IAPP	Islet Amyloid Polypeptide	Protein Coding	P10997	54	GC12P021354	0.930269479751587	https://www.genecards.org/cgi-bin/carddisp.pl?gene=IAPP
GAS5	Growth Arrest Specific 5	RNA Gene		32	GC01M175197	0.930269479751587	https://www.genecards.org/cgi-bin/carddisp.pl?gene=GAS5
COL4A2	Collagen Type IV Alpha 2 Chain	Protein Coding	P08572	59	GC13P110305	0.912879765033722	https://www.genecards.org/cgi-bin/carddisp.pl?gene=COL4A2
GTF2I	General Transcription Factor IIi	Protein Coding	P78347	53	GC07P097850	0.912879765033722	https://www.genecards.org/cgi-bin/carddisp.pl?gene=GTF2I
EIF2B5	Eukaryotic Translation Initiation Factor 2B Subunit Epsilon	Protein Coding	Q13144	55	GC03P184135	0.89515221118927	https://www.genecards.org/cgi-bin/carddisp.pl?gene=EIF2B5
EPHB4	EPH Receptor B4	Protein Coding	P54760	66	GC07M107079	0.887413144111633	https://www.genecards.org/cgi-bin/carddisp.pl?gene=EPHB4
PDGFRB	Platelet Derived Growth Factor Receptor Beta	Protein Coding	P09619	66	GC05M150113	0.887413144111633	https://www.genecards.org/cgi-bin/carddisp.pl?gene=PDGFRB
CAV1	Caveolin 1	Protein Coding	Q03135	61	GC07P116524	0.887413144111633	https://www.genecards.org/cgi-bin/carddisp.pl?gene=CAV1
DCN	Decorin	Protein Coding	P07585	60	GC12M091140	0.887413144111633	https://www.genecards.org/cgi-bin/carddisp.pl?gene=DCN
MAPKAP1	MAPK Associated Protein 1	Protein Coding	Q9BPZ7	57	GC09M125437	0.887413144111633	https://www.genecards.org/cgi-bin/carddisp.pl?gene=MAPKAP1
DKK1	Dickkopf Wnt Signaling Pathway Inhibitor 1	Protein Coding	O94907	56	GC10P052314	0.887413144111633	https://www.genecards.org/cgi-bin/carddisp.pl?gene=DKK1
HNRNPC	Heterogeneous Nuclear Ribonucleoprotein C	Protein Coding	P07910	56	GC14M029157	0.887413144111633	https://www.genecards.org/cgi-bin/carddisp.pl?gene=HNRNPC
AGRP	Agouti Related Neuropeptide	Protein Coding	O00253	53	GC16M067482	0.887413144111633	https://www.genecards.org/cgi-bin/carddisp.pl?gene=AGRP
TUSC3	Tumor Suppressor Candidate 3	Protein Coding	Q13454	53	GC08P015417	0.887413144111633	https://www.genecards.org/cgi-bin/carddisp.pl?gene=TUSC3
SCG5	Secretogranin V	Protein Coding	P05408	52	GC15P032641	0.887413144111633	https://www.genecards.org/cgi-bin/carddisp.pl?gene=SCG5
SSR1	Signal Sequence Receptor Subunit 1	Protein Coding	P43307	50	GC06M007268	0.887413144111633	https://www.genecards.org/cgi-bin/carddisp.pl?gene=SSR1
JPH4	Junctophilin 4	Protein Coding	Q96JJ6	44	GC14M023568	0.887413144111633	https://www.genecards.org/cgi-bin/carddisp.pl?gene=JPH4
NRADDP	Neurotrophin Receptor Associated Death Domain, Pseudogene	Pseudogene		15	GC03P066737	0.887413144111633	https://www.genecards.org/cgi-bin/carddisp.pl?gene=NRADDP
MIR4734	MicroRNA 4734	RNA Gene		14	GC17M038702	0.887413144111633	https://www.genecards.org/cgi-bin/carddisp.pl?gene=MIR4734
IL24	Interleukin 24	Protein Coding	Q13007	53	GC01P206897	0.877066493034363	https://www.genecards.org/cgi-bin/carddisp.pl?gene=IL24
MIR101-1	MicroRNA 101-1	RNA Gene		28	GC01M065058	0.877066493034363	https://www.genecards.org/cgi-bin/carddisp.pl?gene=MIR101-1
EPM2A	EPM2A Glucan Phosphatase, Laforin	Protein Coding	B3EWF7	55	GC06M145382	0.839727282524109	https://www.genecards.org/cgi-bin/carddisp.pl?gene=EPM2A
HNRNPUL2-BSCL2	HNRNPUL2-BSCL2 Readthrough (NMD Candidate)	RNA Gene		24	GC11M142869	0.839727282524109	https://www.genecards.org/cgi-bin/carddisp.pl?gene=HNRNPUL2-BSCL2
YY1	YY1 Transcription Factor	Protein Coding	P25490	60	GC14P100238	0.820420622825623	https://www.genecards.org/cgi-bin/carddisp.pl?gene=YY1
ANXA5	Annexin A5	Protein Coding	P08758	59	GC04M121667	0.820420622825623	https://www.genecards.org/cgi-bin/carddisp.pl?gene=ANXA5
PON2	Paraoxonase 2	Protein Coding	Q15165	57	GC07M095404	0.820420622825623	https://www.genecards.org/cgi-bin/carddisp.pl?gene=PON2
POLG	DNA Polymerase Gamma, Catalytic Subunit	Protein Coding	P54098	62	GC15M166742	0.814974665641785	https://www.genecards.org/cgi-bin/carddisp.pl?gene=POLG
FXN	Frataxin	Protein Coding	Q16595	59	GC09P069035	0.814974665641785	https://www.genecards.org/cgi-bin/carddisp.pl?gene=FXN
KCNC3	Potassium Voltage-Gated Channel Subfamily C Member 3	Protein Coding	Q14003	58	GC19M112870	0.814974665641785	https://www.genecards.org/cgi-bin/carddisp.pl?gene=KCNC3
FA2H	Fatty Acid 2-Hydroxylase	Protein Coding	Q7L5A8	57	GC16M074712	0.814974665641785	https://www.genecards.org/cgi-bin/carddisp.pl?gene=FA2H
SAR1B	Secretion Associated Ras Related GTPase 1B	Protein Coding	Q9Y6B6	54	GC05M134601	0.814974665641785	https://www.genecards.org/cgi-bin/carddisp.pl?gene=SAR1B
GBA2	Glucosylceramidase Beta 2	Protein Coding	Q9HCG7	53	GC09M035736	0.814974665641785	https://www.genecards.org/cgi-bin/carddisp.pl?gene=GBA2
COG4	Component Of Oligomeric Golgi Complex 4	Protein Coding	Q9H9E3	51	GC16M076169	0.814974665641785	https://www.genecards.org/cgi-bin/carddisp.pl?gene=COG4
MSTO1	Misato Mitochondrial Distribution And Morphology Regulator 1	Protein Coding	Q9BUK6	51	GC01P180061	0.814974665641785	https://www.genecards.org/cgi-bin/carddisp.pl?gene=MSTO1
TBC1D20	TBC1 Domain Family Member 20	Protein Coding	Q96BZ9	50	GC20M000423	0.814974665641785	https://www.genecards.org/cgi-bin/carddisp.pl?gene=TBC1D20
SNX14	Sorting Nexin 14	Protein Coding	Q9Y5W7	49	GC06M112310	0.814974665641785	https://www.genecards.org/cgi-bin/carddisp.pl?gene=SNX14
WDR47	WD Repeat Domain 47	Protein Coding	O94967	46	GC01M108970	0.814974665641785	https://www.genecards.org/cgi-bin/carddisp.pl?gene=WDR47
ARMC8	Armadillo Repeat Containing 8	Protein Coding	Q8IUR7	44	GC03P138187	0.814974665641785	https://www.genecards.org/cgi-bin/carddisp.pl?gene=ARMC8
BEAN1	Brain Expressed Associated With NEDD4 1	Protein Coding	Q3B7T3	43	GC16P129676	0.814974665641785	https://www.genecards.org/cgi-bin/carddisp.pl?gene=BEAN1
CD36	CD36 Molecule (CD36 Blood Group)	Protein Coding	P16671	63	GC07P080369	0.78037565946579	https://www.genecards.org/cgi-bin/carddisp.pl?gene=CD36
CA4	Carbonic Anhydrase 4	Protein Coding	P22748	59	GC17P060149	0.78037565946579	https://www.genecards.org/cgi-bin/carddisp.pl?gene=CA4
FABP4	Fatty Acid Binding Protein 4	Protein Coding	P15090	56	GC08M081478	0.78037565946579	https://www.genecards.org/cgi-bin/carddisp.pl?gene=FABP4
CCDC88A	Coiled-Coil Domain Containing 88A	Protein Coding	Q3V6T2	54	GC02M055287	0.78037565946579	https://www.genecards.org/cgi-bin/carddisp.pl?gene=CCDC88A
MIR494	MicroRNA 494	RNA Gene		26	GC14P122521	0.78037565946579	https://www.genecards.org/cgi-bin/carddisp.pl?gene=MIR494
TGM2	Transglutaminase 2	Protein Coding	P21980	60	GC20M038127	0.759561896324158	https://www.genecards.org/cgi-bin/carddisp.pl?gene=TGM2
PNLIP	Pancreatic Lipase	Protein Coding	P16233	59	GC10P116545	0.759561896324158	https://www.genecards.org/cgi-bin/carddisp.pl?gene=PNLIP
EIF2AK4	Eukaryotic Translation Initiation Factor 2 Alpha Kinase 4	Protein Coding	Q9P2K8	57	GC15P039934	0.759561896324158	https://www.genecards.org/cgi-bin/carddisp.pl?gene=EIF2AK4
TMEM214	Transmembrane Protein 214	Protein Coding	Q6NUQ4	44	GC02P027032	0.759561896324158	https://www.genecards.org/cgi-bin/carddisp.pl?gene=TMEM214
PROC	Protein C, Inactivator Of Coagulation Factors Va And VIIIa	Protein Coding	P04070	65	GC02P127418	0.738161444664001	https://www.genecards.org/cgi-bin/carddisp.pl?gene=PROC
FOS	Fos Proto-Oncogene, AP-1 Transcription Factor Subunit	Protein Coding	P01100	64	GC14P075278	0.738161444664001	https://www.genecards.org/cgi-bin/carddisp.pl?gene=FOS
IFNAR1	Interferon Alpha And Beta Receptor Subunit 1	Protein Coding	P17181	62	GC21P033324	0.738161444664001	https://www.genecards.org/cgi-bin/carddisp.pl?gene=IFNAR1
PPT1	Palmitoyl-Protein Thioesterase 1	Protein Coding	P50897	59	GC01M040289	0.738161444664001	https://www.genecards.org/cgi-bin/carddisp.pl?gene=PPT1
PTGES3	Prostaglandin E Synthase 3	Protein Coding	Q15185	59	GC12M060687	0.738161444664001	https://www.genecards.org/cgi-bin/carddisp.pl?gene=PTGES3
GDF15	Growth Differentiation Factor 15	Protein Coding	Q99988	56	GC19P161671	0.738161444664001	https://www.genecards.org/cgi-bin/carddisp.pl?gene=GDF15
MAP1LC3B	Microtubule Associated Protein 1 Light Chain 3 Beta	Protein Coding	Q9GZQ8	54	GC16P130587	0.738161444664001	https://www.genecards.org/cgi-bin/carddisp.pl?gene=MAP1LC3B
SEC23B	SEC23 Homolog B, COPII Coat Complex Component	Protein Coding	Q15437	53	GC20P018507	0.738161444664001	https://www.genecards.org/cgi-bin/carddisp.pl?gene=SEC23B
H19	H19 Imprinted Maternally Expressed Transcript	RNA Gene		36	GC11M001995	0.738161444664001	https://www.genecards.org/cgi-bin/carddisp.pl?gene=H19
TUG1	Taurine Up-Regulated 1	Protein Coding	A0A6I8PU40	33	GC22P030969	0.738161444664001	https://www.genecards.org/cgi-bin/carddisp.pl?gene=TUG1
INSR	Insulin Receptor	Protein Coding	P06213	66	GC19M007112	0.716121792793274	https://www.genecards.org/cgi-bin/carddisp.pl?gene=INSR
APOA1	Apolipoprotein A1	Protein Coding	P02647	63	GC11M116835	0.716121792793274	https://www.genecards.org/cgi-bin/carddisp.pl?gene=APOA1
RYR1	Ryanodine Receptor 1	Protein Coding	P21817	62	GC19P162024	0.716121792793274	https://www.genecards.org/cgi-bin/carddisp.pl?gene=RYR1
AGER	Advanced Glycosylation End-Product Specific Receptor	Protein Coding	Q15109	59	GC06M032180	0.716121792793274	https://www.genecards.org/cgi-bin/carddisp.pl?gene=AGER
PTH	Parathyroid Hormone	Protein Coding	P01270	58	GC11M013492	0.716121792793274	https://www.genecards.org/cgi-bin/carddisp.pl?gene=PTH
HFE	Homeostatic Iron Regulator	Protein Coding	Q30201	57	GC06P026087	0.716121792793274	https://www.genecards.org/cgi-bin/carddisp.pl?gene=HFE
GRP	Gastrin Releasing Peptide	Protein Coding	P07492	53	GC18P059220	0.716121792793274	https://www.genecards.org/cgi-bin/carddisp.pl?gene=GRP
MUC5AC	Mucin 5AC, Oligomeric Mucus/Gel-Forming	Protein Coding	P98088	51	GC11P022721	0.716121792793274	https://www.genecards.org/cgi-bin/carddisp.pl?gene=MUC5AC
EIF4G1	Eukaryotic Translation Initiation Factor 4 Gamma 1	Protein Coding	Q04637	59	GC03P184314	0.693381905555725	https://www.genecards.org/cgi-bin/carddisp.pl?gene=EIF4G1
TRAP1	TNF Receptor Associated Protein 1	Protein Coding	Q12931	57	GC16M052311	0.693381905555725	https://www.genecards.org/cgi-bin/carddisp.pl?gene=TRAP1
GH1	Growth Hormone 1	Protein Coding	P01241	56	GC17M063917	0.693381905555725	https://www.genecards.org/cgi-bin/carddisp.pl?gene=GH1
SEC63	SEC63 Homolog, Protein Translocation Regulator	Protein Coding	Q9UGP8	54	GC06M107867	0.693381905555725	https://www.genecards.org/cgi-bin/carddisp.pl?gene=SEC63
SDF2	Stromal Cell Derived Factor 2	Protein Coding	Q99470	45	GC17M100471	0.693381905555725	https://www.genecards.org/cgi-bin/carddisp.pl?gene=SDF2
MIR26A1	MicroRNA 26a-1	RNA Gene		30	GC03P037969	0.693381905555725	https://www.genecards.org/cgi-bin/carddisp.pl?gene=MIR26A1
MIR98	MicroRNA 98	RNA Gene		26	GC0XM054049	0.693381905555725	https://www.genecards.org/cgi-bin/carddisp.pl?gene=MIR98
ABL1	ABL Proto-Oncogene 1, Non-Receptor Tyrosine Kinase	Protein Coding	P00519	66	GC09P130713	0.669870615005493	https://www.genecards.org/cgi-bin/carddisp.pl?gene=ABL1
PPARGC1A	PPARG Coactivator 1 Alpha	Protein Coding	Q9UBK2	60	GC04M023755	0.669870615005493	https://www.genecards.org/cgi-bin/carddisp.pl?gene=PPARGC1A
BAD	BCL2 Associated Agonist Of Cell Death	Protein Coding	Q92934	57	GC11M142925	0.669870615005493	https://www.genecards.org/cgi-bin/carddisp.pl?gene=BAD
FGF21	Fibroblast Growth Factor 21	Protein Coding	Q9NSA1	52	GC19P162397	0.669870615005493	https://www.genecards.org/cgi-bin/carddisp.pl?gene=FGF21
NELL2	Neural EGFL Like 2	Protein Coding	Q99435	52	GC12M044509	0.669870615005493	https://www.genecards.org/cgi-bin/carddisp.pl?gene=NELL2
COL4A2-AS1	COL4A2 Antisense RNA 1	RNA Gene		22	GC13M110491	0.669870615005493	https://www.genecards.org/cgi-bin/carddisp.pl?gene=COL4A2-AS1
GJA1	Gap Junction Protein Alpha 1	Protein Coding	P17302	63	GC06P191766	0.645503520965576	https://www.genecards.org/cgi-bin/carddisp.pl?gene=GJA1
IFNG	Interferon Gamma	Protein Coding	P01579	63	GC12M068154	0.645503520965576	https://www.genecards.org/cgi-bin/carddisp.pl?gene=IFNG
TSC1	TSC Complex Subunit 1	Protein Coding	Q92574	61	GC09M132891	0.645503520965576	https://www.genecards.org/cgi-bin/carddisp.pl?gene=TSC1
NAMPT	Nicotinamide Phosphoribosyltransferase	Protein Coding	P43490	60	GC07M106248	0.645503520965576	https://www.genecards.org/cgi-bin/carddisp.pl?gene=NAMPT
ASNS	Asparagine Synthetase (Glutamine-Hydrolyzing)	Protein Coding	P08243	59	GC07M097854	0.645503520965576	https://www.genecards.org/cgi-bin/carddisp.pl?gene=ASNS
CPB1	Carboxypeptidase B1	Protein Coding	P15086	54	GC03P148791	0.645503520965576	https://www.genecards.org/cgi-bin/carddisp.pl?gene=CPB1
NPHS2	NPHS2 Stomatin Family Member, Podocin	Protein Coding	Q9NP85	54	GC01M179554	0.645503520965576	https://www.genecards.org/cgi-bin/carddisp.pl?gene=NPHS2
STARD4	StAR Related Lipid Transfer Domain Containing 4	Protein Coding	Q96DR4	47	GC05M111496	0.645503520965576	https://www.genecards.org/cgi-bin/carddisp.pl?gene=STARD4
MALAT1	Metastasis Associated Lung Adenocarcinoma Transcript 1	RNA Gene		33	GC11P115065	0.645503520965576	https://www.genecards.org/cgi-bin/carddisp.pl?gene=MALAT1
MIR199A1	MicroRNA 199a-1	RNA Gene		28	GC19M010817	0.645503520965576	https://www.genecards.org/cgi-bin/carddisp.pl?gene=MIR199A1
MIR200A	MicroRNA 200a	RNA Gene		28	GC01P082902	0.645503520965576	https://www.genecards.org/cgi-bin/carddisp.pl?gene=MIR200A
GAA	Alpha Glucosidase	Protein Coding	P10253	63	GC17P080101	0.620179653167725	https://www.genecards.org/cgi-bin/carddisp.pl?gene=GAA
DDX3X	DEAD-Box Helicase 3 X-Linked	Protein Coding	O00571	62	GC0XP041333	0.620179653167725	https://www.genecards.org/cgi-bin/carddisp.pl?gene=DDX3X
TNFAIP3	TNF Alpha Induced Protein 3	Protein Coding	P21580	62	GC06P137866	0.620179653167725	https://www.genecards.org/cgi-bin/carddisp.pl?gene=TNFAIP3
MSTN	Myostatin	Protein Coding	O14793	59	GC02M190055	0.620179653167725	https://www.genecards.org/cgi-bin/carddisp.pl?gene=MSTN
ATF1	Activating Transcription Factor 1	Protein Coding	P18846	58	GC12P050763	0.620179653167725	https://www.genecards.org/cgi-bin/carddisp.pl?gene=ATF1
FUS	FUS RNA Binding Protein	Protein Coding	P35637	57	GC16P031180	0.620179653167725	https://www.genecards.org/cgi-bin/carddisp.pl?gene=FUS
DYSF	Dysferlin	Protein Coding	O75923	56	GC02P071453	0.620179653167725	https://www.genecards.org/cgi-bin/carddisp.pl?gene=DYSF
CDKN3	Cyclin Dependent Kinase Inhibitor 3	Protein Coding	Q16667	54	GC14P061896	0.620179653167725	https://www.genecards.org/cgi-bin/carddisp.pl?gene=CDKN3
PAWR	Pro-Apoptotic WT1 Regulator	Protein Coding	Q96IZ0	54	GC12M079574	0.620179653167725	https://www.genecards.org/cgi-bin/carddisp.pl?gene=PAWR
CHST6	Carbohydrate Sulfotransferase 6	Protein Coding	Q9GZX3	53	GC16M075472	0.620179653167725	https://www.genecards.org/cgi-bin/carddisp.pl?gene=CHST6
SLC37A4	Solute Carrier Family 37 Member 4	Protein Coding	O43826	53	GC11M143843	0.620179653167725	https://www.genecards.org/cgi-bin/carddisp.pl?gene=SLC37A4
GPX8	Glutathione Peroxidase 8 (Putative)	Protein Coding	Q8TED1	51	GC05P055160	0.620179653167725	https://www.genecards.org/cgi-bin/carddisp.pl?gene=GPX8
ORMDL3	ORMDL Sphingolipid Biosynthesis Regulator 3	Protein Coding	Q8N138	49	GC17M039921	0.620179653167725	https://www.genecards.org/cgi-bin/carddisp.pl?gene=ORMDL3
EZH2	Enhancer Of Zeste 2 Polycomb Repressive Complex 2 Subunit	Protein Coding	Q15910	66	GC07M148807	0.593776822090149	https://www.genecards.org/cgi-bin/carddisp.pl?gene=EZH2
TSC2	TSC Complex Subunit 2	Protein Coding	P49815	64	GC16P128054	0.593776822090149	https://www.genecards.org/cgi-bin/carddisp.pl?gene=TSC2
ABCC1	ATP Binding Cassette Subfamily C Member 1 (ABCC1 Blood Group)	Protein Coding	P33527	61	GC16P015949	0.593776822090149	https://www.genecards.org/cgi-bin/carddisp.pl?gene=ABCC1
CDKN1B	Cyclin Dependent Kinase Inhibitor 1B	Protein Coding	P46527	61	GC12P080490	0.593776822090149	https://www.genecards.org/cgi-bin/carddisp.pl?gene=CDKN1B
HSPA9	Heat Shock Protein Family A (Hsp70) Member 9	Protein Coding	P38646	61	GC05M138554	0.593776822090149	https://www.genecards.org/cgi-bin/carddisp.pl?gene=HSPA9
SMPD1	Sphingomyelin Phosphodiesterase 1	Protein Coding	P17405	61	GC11P006390	0.593776822090149	https://www.genecards.org/cgi-bin/carddisp.pl?gene=SMPD1
HNRNPA1	Heterogeneous Nuclear Ribonucleoprotein A1	Protein Coding	P09651	60	GC12P054280	0.593776822090149	https://www.genecards.org/cgi-bin/carddisp.pl?gene=HNRNPA1
SP1	Sp1 Transcription Factor	Protein Coding	P08047	60	GC12P053380	0.593776822090149	https://www.genecards.org/cgi-bin/carddisp.pl?gene=SP1
AFP	Alpha Fetoprotein	Protein Coding	P02771	59	GC04P073431	0.593776822090149	https://www.genecards.org/cgi-bin/carddisp.pl?gene=AFP
BACE1	Beta-Secretase 1	Protein Coding	P56817	59	GC11M117285	0.593776822090149	https://www.genecards.org/cgi-bin/carddisp.pl?gene=BACE1
PTPA	Protein Phosphatase 2 Phosphatase Activator	Protein Coding	Q15257	58	GC09P156015	0.593776822090149	https://www.genecards.org/cgi-bin/carddisp.pl?gene=PTPA
APOL1	Apolipoprotein L1	Protein Coding	O14791	56	GC22P036253	0.593776822090149	https://www.genecards.org/cgi-bin/carddisp.pl?gene=APOL1
CTBP2	C-Terminal Binding Protein 2	Protein Coding	P56545	56	GC10M124984	0.593776822090149	https://www.genecards.org/cgi-bin/carddisp.pl?gene=CTBP2
ELAVL1	ELAV Like RNA Binding Protein 1	Protein Coding	Q15717	55	GC19M007958	0.593776822090149	https://www.genecards.org/cgi-bin/carddisp.pl?gene=ELAVL1
MIR16-1	MicroRNA 16-1	RNA Gene		29	GC13M050048	0.593776822090149	https://www.genecards.org/cgi-bin/carddisp.pl?gene=MIR16-1
CRMA	Cardiomyocyte Maturation Associated LncRNA	RNA Gene		22	GC20M062980	0.593776822090149	https://www.genecards.org/cgi-bin/carddisp.pl?gene=CRMA
PTEN	Phosphatase And Tensin Homolog	Protein Coding	P60484	65	GC10P128607	0.566143989562988	https://www.genecards.org/cgi-bin/carddisp.pl?gene=PTEN
ALDH2	Aldehyde Dehydrogenase 2 Family Member	Protein Coding	P05091	63	GC12P111766	0.566143989562988	https://www.genecards.org/cgi-bin/carddisp.pl?gene=ALDH2
NRAS	NRAS Proto-Oncogene, GTPase	Protein Coding	P01111	63	GC01M114704	0.566143989562988	https://www.genecards.org/cgi-bin/carddisp.pl?gene=NRAS
CP	Ceruloplasmin	Protein Coding	P00450	62	GC03M149162	0.566143989562988	https://www.genecards.org/cgi-bin/carddisp.pl?gene=CP
EDN1	Endothelin 1	Protein Coding	P05305	61	GC06P014983	0.566143989562988	https://www.genecards.org/cgi-bin/carddisp.pl?gene=EDN1
MTHFR	Methylenetetrahydrofolate Reductase	Protein Coding	P42898	61	GC01M011785	0.566143989562988	https://www.genecards.org/cgi-bin/carddisp.pl?gene=MTHFR
ACLY	ATP Citrate Lyase	Protein Coding	P53396	59	GC17M041866	0.566143989562988	https://www.genecards.org/cgi-bin/carddisp.pl?gene=ACLY
CHKA	Choline Kinase Alpha	Protein Coding	P35790	57	GC11M068052	0.566143989562988	https://www.genecards.org/cgi-bin/carddisp.pl?gene=CHKA
DNAJB1	DnaJ Heat Shock Protein Family (Hsp40) Member B1	Protein Coding	P25685	57	GC19M112035	0.566143989562988	https://www.genecards.org/cgi-bin/carddisp.pl?gene=DNAJB1
ERAP1	Endoplasmic Reticulum Aminopeptidase 1	Protein Coding	Q9NZ08	57	GC05M096760	0.566143989562988	https://www.genecards.org/cgi-bin/carddisp.pl?gene=ERAP1
IFNB1	Interferon Beta 1	Protein Coding	P01574	56	GC09M021077	0.566143989562988	https://www.genecards.org/cgi-bin/carddisp.pl?gene=IFNB1
DIO2	Iodothyronine Deiodinase 2	Protein Coding	Q92813	53	GC14M080197	0.566143989562988	https://www.genecards.org/cgi-bin/carddisp.pl?gene=DIO2
IFNA1	Interferon Alpha 1	Protein Coding	P01562	52	GC09P022139	0.566143989562988	https://www.genecards.org/cgi-bin/carddisp.pl?gene=IFNA1
NCK2	NCK Adaptor Protein 2	Protein Coding	O43639	52	GC02P105744	0.566143989562988	https://www.genecards.org/cgi-bin/carddisp.pl?gene=NCK2
NFYC	Nuclear Transcription Factor Y Subunit Gamma	Protein Coding	Q13952	52	GC01P040691	0.566143989562988	https://www.genecards.org/cgi-bin/carddisp.pl?gene=NFYC
NHLRC1	NHL Repeat Containing E3 Ubiquitin Protein Ligase 1	Protein Coding	Q6VVB1	52	GC06M018120	0.566143989562988	https://www.genecards.org/cgi-bin/carddisp.pl?gene=NHLRC1
NFYA	Nuclear Transcription Factor Y Subunit Alpha	Protein Coding	P23511	51	GC06P190862	0.566143989562988	https://www.genecards.org/cgi-bin/carddisp.pl?gene=NFYA
MIOX	Myo-Inositol Oxygenase	Protein Coding	Q9UGB7	49	GC22P050486	0.566143989562988	https://www.genecards.org/cgi-bin/carddisp.pl?gene=MIOX
PARP16	Poly(ADP-Ribose) Polymerase Family Member 16	Protein Coding	Q8N5Y8	42	GC15M166086	0.566143989562988	https://www.genecards.org/cgi-bin/carddisp.pl?gene=PARP16
MIR125A	MicroRNA 125a	RNA Gene		30	GC19P162542	0.566143989562988	https://www.genecards.org/cgi-bin/carddisp.pl?gene=MIR125A
MIR150	MicroRNA 150	RNA Gene		30	GC19M049500	0.566143989562988	https://www.genecards.org/cgi-bin/carddisp.pl?gene=MIR150
MIR216A	MicroRNA 216a	RNA Gene		28	GC02M055988	0.566143989562988	https://www.genecards.org/cgi-bin/carddisp.pl?gene=MIR216A
GH-LCR	Growth Hormone Locus Control Region	Functional Element		10	GC17P063917	0.566143989562988	https://www.genecards.org/cgi-bin/carddisp.pl?gene=GH-LCR
LOC129936816	ATAC-STARR-Seq Lymphoblastoid Silent Region 14408	Functional Element		4	GC03P068506	0.566143989562988	https://www.genecards.org/cgi-bin/carddisp.pl?gene=LOC129936816
FGFR3	Fibroblast Growth Factor Receptor 3	Protein Coding	P22607	68	GC04P031618	0.537091374397278	https://www.genecards.org/cgi-bin/carddisp.pl?gene=FGFR3
MET	MET Proto-Oncogene, Receptor Tyrosine Kinase	Protein Coding	P08581	67	GC07P116672	0.537091374397278	https://www.genecards.org/cgi-bin/carddisp.pl?gene=MET
CTSB	Cathepsin B	Protein Coding	P07858	63	GC08M011842	0.537091374397278	https://www.genecards.org/cgi-bin/carddisp.pl?gene=CTSB
VIM	Vimentin	Protein Coding	P08670	63	GC10P017227	0.537091374397278	https://www.genecards.org/cgi-bin/carddisp.pl?gene=VIM
ACE2	Angiotensin Converting Enzyme 2	Protein Coding	Q9BYF1	62	GC0XM015494	0.537091374397278	https://www.genecards.org/cgi-bin/carddisp.pl?gene=ACE2
CTH	Cystathionine Gamma-Lyase	Protein Coding	P32929	62	GC01P070411	0.537091374397278	https://www.genecards.org/cgi-bin/carddisp.pl?gene=CTH
RIPK2	Receptor Interacting Serine/Threonine Kinase 2	Protein Coding	O43353	59	GC08P090083	0.537091374397278	https://www.genecards.org/cgi-bin/carddisp.pl?gene=RIPK2
SPTLC1	Serine Palmitoyltransferase Long Chain Base Subunit 1	Protein Coding	O15269	59	GC09M126478	0.537091374397278	https://www.genecards.org/cgi-bin/carddisp.pl?gene=SPTLC1
LAMP2	Lysosomal Associated Membrane Protein 2	Protein Coding	P13473	57	GC0XM120426	0.537091374397278	https://www.genecards.org/cgi-bin/carddisp.pl?gene=LAMP2
NOX4	NADPH Oxidase 4	Protein Coding	Q9NPH5	56	GC11M089324	0.537091374397278	https://www.genecards.org/cgi-bin/carddisp.pl?gene=NOX4
COPS5	COP9 Signalosome Subunit 5	Protein Coding	Q92905	55	GC08M067043	0.537091374397278	https://www.genecards.org/cgi-bin/carddisp.pl?gene=COPS5
TFG	Trafficking From ER To Golgi Regulator	Protein Coding	Q92734	54	GC03P100709	0.537091374397278	https://www.genecards.org/cgi-bin/carddisp.pl?gene=TFG
TIA1	TIA1 Cytotoxic Granule Associated RNA Binding Protein	Protein Coding	P31483	54	GC02M070209	0.537091374397278	https://www.genecards.org/cgi-bin/carddisp.pl?gene=TIA1
IL33	Interleukin 33	Protein Coding	O95760	53	GC09P010957	0.537091374397278	https://www.genecards.org/cgi-bin/carddisp.pl?gene=IL33
UFM1	Ubiquitin Fold Modifier 1	Protein Coding	P61960	52	GC13P038349	0.537091374397278	https://www.genecards.org/cgi-bin/carddisp.pl?gene=UFM1
XAF1	XIAP Associated Factor 1	Protein Coding	Q6GPH4	50	GC17P164088	0.537091374397278	https://www.genecards.org/cgi-bin/carddisp.pl?gene=XAF1
GOLGA3	Golgin A3	Protein Coding	Q08378	49	GC12M132768	0.537091374397278	https://www.genecards.org/cgi-bin/carddisp.pl?gene=GOLGA3
UBA52	Ubiquitin A-52 Residue Ribosomal Protein Fusion Product 1	Protein Coding	P62987	48	GC19P018563	0.537091374397278	https://www.genecards.org/cgi-bin/carddisp.pl?gene=UBA52
SCAMP5	Secretory Carrier Membrane Protein 5	Protein Coding	Q8TAC9	46	GC15P074957	0.537091374397278	https://www.genecards.org/cgi-bin/carddisp.pl?gene=SCAMP5
FOXO6	Forkhead Box O6	Protein Coding	A8MYZ6	42	GC01P041361	0.537091374397278	https://www.genecards.org/cgi-bin/carddisp.pl?gene=FOXO6
PTPN11	Protein Tyrosine Phosphatase Non-Receptor Type 11	Protein Coding	Q06124	67	GC12P112418	0.506374597549438	https://www.genecards.org/cgi-bin/carddisp.pl?gene=PTPN11
JAK1	Janus Kinase 1	Protein Coding	P23458	66	GC01M064833	0.506374597549438	https://www.genecards.org/cgi-bin/carddisp.pl?gene=JAK1
F2	Coagulation Factor II, Thrombin	Protein Coding	P00734	63	GC11P049467	0.506374597549438	https://www.genecards.org/cgi-bin/carddisp.pl?gene=F2
GSK3A	Glycogen Synthase Kinase 3 Alpha	Protein Coding	P49840	63	GC19M112567	0.506374597549438	https://www.genecards.org/cgi-bin/carddisp.pl?gene=GSK3A
TGFB2	Transforming Growth Factor Beta 2	Protein Coding	P61812	63	GC01P218345	0.506374597549438	https://www.genecards.org/cgi-bin/carddisp.pl?gene=TGFB2
CHRM3	Cholinergic Receptor Muscarinic 3	Protein Coding	P20309	61	GC01P239386	0.506374597549438	https://www.genecards.org/cgi-bin/carddisp.pl?gene=CHRM3
AHR	Aryl Hydrocarbon Receptor	Protein Coding	P35869	60	GC07P016916	0.506374597549438	https://www.genecards.org/cgi-bin/carddisp.pl?gene=AHR
EPHA3	EPH Receptor A3	Protein Coding	P29320	60	GC03P089077	0.506374597549438	https://www.genecards.org/cgi-bin/carddisp.pl?gene=EPHA3
GLP1R	Glucagon Like Peptide 1 Receptor	Protein Coding	P43220	60	GC06P039048	0.506374597549438	https://www.genecards.org/cgi-bin/carddisp.pl?gene=GLP1R
JUP	Junction Plakoglobin	Protein Coding	P14923	60	GC17M041754	0.506374597549438	https://www.genecards.org/cgi-bin/carddisp.pl?gene=JUP
PKD2	Polycystin 2, Transient Receptor Potential Cation Channel	Protein Coding	Q13563	60	GC04P088007	0.506374597549438	https://www.genecards.org/cgi-bin/carddisp.pl?gene=PKD2
CD274	CD274 Molecule	Protein Coding	Q9NZQ7	59	GC09P005450	0.506374597549438	https://www.genecards.org/cgi-bin/carddisp.pl?gene=CD274
HNF1A	HNF1 Homeobox A	Protein Coding	P20823	59	GC12P120978	0.506374597549438	https://www.genecards.org/cgi-bin/carddisp.pl?gene=HNF1A
STAR	Steroidogenic Acute Regulatory Protein	Protein Coding	P49675	58	GC08M038896	0.506374597549438	https://www.genecards.org/cgi-bin/carddisp.pl?gene=STAR
TRIM28	Tripartite Motif Containing 28	Protein Coding	Q13263	57	GC19P058544	0.506374597549438	https://www.genecards.org/cgi-bin/carddisp.pl?gene=TRIM28
CAPN5	Calpain 5	Protein Coding	O15484	56	GC11P077066	0.506374597549438	https://www.genecards.org/cgi-bin/carddisp.pl?gene=CAPN5
RACK1	Receptor For Activated C Kinase 1	Protein Coding	P63244	56	GC05M183748	0.506374597549438	https://www.genecards.org/cgi-bin/carddisp.pl?gene=RACK1
DNAJA1	DnaJ Heat Shock Protein Family (Hsp40) Member A1	Protein Coding	P31689	55	GC09P033025	0.506374597549438	https://www.genecards.org/cgi-bin/carddisp.pl?gene=DNAJA1
FABP5	Fatty Acid Binding Protein 5	Protein Coding	Q01469	55	GC08P081282	0.506374597549438	https://www.genecards.org/cgi-bin/carddisp.pl?gene=FABP5
UBE2D1	Ubiquitin Conjugating Enzyme E2 D1	Protein Coding	P51668	55	GC10P058334	0.506374597549438	https://www.genecards.org/cgi-bin/carddisp.pl?gene=UBE2D1
RBP3	Retinol Binding Protein 3	Protein Coding	P10745	54	GC10P047348	0.506374597549438	https://www.genecards.org/cgi-bin/carddisp.pl?gene=RBP3
DUSP5	Dual Specificity Phosphatase 5	Protein Coding	Q16690	53	GC10P110497	0.506374597549438	https://www.genecards.org/cgi-bin/carddisp.pl?gene=DUSP5
SRI	Sorcin	Protein Coding	P30626	53	GC07M088205	0.506374597549438	https://www.genecards.org/cgi-bin/carddisp.pl?gene=SRI
ELOB	Elongin B	Protein Coding	Q15370	52	GC16M052228	0.506374597549438	https://www.genecards.org/cgi-bin/carddisp.pl?gene=ELOB
POMP	Proteasome Maturation Protein	Protein Coding	Q9Y244	52	GC13P028659	0.506374597549438	https://www.genecards.org/cgi-bin/carddisp.pl?gene=POMP
SLC30A3	Solute Carrier Family 30 Member 3	Protein Coding	Q99726	52	GC02M027254	0.506374597549438	https://www.genecards.org/cgi-bin/carddisp.pl?gene=SLC30A3
COX7A2L	Cytochrome C Oxidase Subunit 7A2 Like	Protein Coding	O14548	51	GC02M042312	0.506374597549438	https://www.genecards.org/cgi-bin/carddisp.pl?gene=COX7A2L
ZBTB7A	Zinc Finger And BTB Domain Containing 7A	Protein Coding	O95365	51	GC19M111652	0.506374597549438	https://www.genecards.org/cgi-bin/carddisp.pl?gene=ZBTB7A
ENAM	Enamelin	Protein Coding	Q9NRM1	49	GC04P070628	0.506374597549438	https://www.genecards.org/cgi-bin/carddisp.pl?gene=ENAM
RRBP1	Ribosome Binding Protein 1	Protein Coding	Q9P2E9	49	GC20M017613	0.506374597549438	https://www.genecards.org/cgi-bin/carddisp.pl?gene=RRBP1
SUPT20H	SPT20 Homolog, SAGA Complex Component	Protein Coding	Q8NEM7	49	GC13M037009	0.506374597549438	https://www.genecards.org/cgi-bin/carddisp.pl?gene=SUPT20H
NOXA1	NADPH Oxidase Activator 1	Protein Coding	Q86UR1	46	GC09P137423	0.506374597549438	https://www.genecards.org/cgi-bin/carddisp.pl?gene=NOXA1
ANKS4B	Ankyrin Repeat And Sterile Alpha Motif Domain Containing 4B	Protein Coding	Q8N8V4	44	GC16P128520	0.506374597549438	https://www.genecards.org/cgi-bin/carddisp.pl?gene=ANKS4B
RETREG3	Reticulophagy Regulator Family Member 3	Protein Coding	Q86VR2	44	GC17M100991	0.506374597549438	https://www.genecards.org/cgi-bin/carddisp.pl?gene=RETREG3
SUPT20HL1	SUPT20H Like 1	Protein Coding	Q3ZLR7	23	GC0XP024362	0.506374597549438	https://www.genecards.org/cgi-bin/carddisp.pl?gene=SUPT20HL1
ESR1	Estrogen Receptor 1	Protein Coding	P03372	68	GC06P151656	0.473670065402985	https://www.genecards.org/cgi-bin/carddisp.pl?gene=ESR1
RAF1	Raf-1 Proto-Oncogene, Serine/Threonine Kinase	Protein Coding	P04049	67	GC03M012583	0.473670065402985	https://www.genecards.org/cgi-bin/carddisp.pl?gene=RAF1
CBS	Cystathionine Beta-Synthase	Protein Coding	P35520	63	GC21M043053	0.473670065402985	https://www.genecards.org/cgi-bin/carddisp.pl?gene=CBS
ELANE	Elastase, Neutrophil Expressed	Protein Coding	P08246	63	GC19P160928	0.473670065402985	https://www.genecards.org/cgi-bin/carddisp.pl?gene=ELANE
LYN	LYN Proto-Oncogene, Src Family Tyrosine Kinase	Protein Coding	P07948	63	GC08P055879	0.473670065402985	https://www.genecards.org/cgi-bin/carddisp.pl?gene=LYN
FASN	Fatty Acid Synthase	Protein Coding	P49327	62	GC17M082078	0.473670065402985	https://www.genecards.org/cgi-bin/carddisp.pl?gene=FASN
MYB	MYB Proto-Oncogene, Transcription Factor	Protein Coding	P10242	62	GC06P135181	0.473670065402985	https://www.genecards.org/cgi-bin/carddisp.pl?gene=MYB
TAP1	Transporter 1, ATP Binding Cassette Subfamily B Member	Protein Coding	Q03518	61	GC06M111603	0.473670065402985	https://www.genecards.org/cgi-bin/carddisp.pl?gene=TAP1
COL4A1	Collagen Type IV Alpha 1 Chain	Protein Coding	P02462	60	GC13M110148	0.473670065402985	https://www.genecards.org/cgi-bin/carddisp.pl?gene=COL4A1
PPP2R1A	Protein Phosphatase 2 Scaffold Subunit Aalpha	Protein Coding	P30153	60	GC19P162556	0.473670065402985	https://www.genecards.org/cgi-bin/carddisp.pl?gene=PPP2R1A
ROS1	ROS Proto-Oncogene 1, Receptor Tyrosine Kinase	Protein Coding	P08922	60	GC06M117287	0.473670065402985	https://www.genecards.org/cgi-bin/carddisp.pl?gene=ROS1
RYR2	Ryanodine Receptor 2	Protein Coding	Q92736	60	GC01P237042	0.473670065402985	https://www.genecards.org/cgi-bin/carddisp.pl?gene=RYR2
ACTN4	Actinin Alpha 4	Protein Coding	O43707	59	GC19P038647	0.473670065402985	https://www.genecards.org/cgi-bin/carddisp.pl?gene=ACTN4
ATP5F1A	ATP Synthase F1 Subunit Alpha	Protein Coding	P25705	59	GC18M046081	0.473670065402985	https://www.genecards.org/cgi-bin/carddisp.pl?gene=ATP5F1A
CD81	CD81 Molecule	Protein Coding	P60033	59	GC11P022770	0.473670065402985	https://www.genecards.org/cgi-bin/carddisp.pl?gene=CD81
CYBA	Cytochrome B-245 Alpha Chain	Protein Coding	P13498	59	GC16M088643	0.473670065402985	https://www.genecards.org/cgi-bin/carddisp.pl?gene=CYBA
MYH6	Myosin Heavy Chain 6	Protein Coding	P13533	59	GC14M023381	0.473670065402985	https://www.genecards.org/cgi-bin/carddisp.pl?gene=MYH6
TRPC3	Transient Receptor Potential Cation Channel Subfamily C Member 3	Protein Coding	Q13507	58	GC04M121879	0.473670065402985	https://www.genecards.org/cgi-bin/carddisp.pl?gene=TRPC3
ANG	Angiogenin	Protein Coding	P03950	57	GC14P060243	0.473670065402985	https://www.genecards.org/cgi-bin/carddisp.pl?gene=ANG
ARRB1	Arrestin Beta 1	Protein Coding	P49407	57	GC11M143283	0.473670065402985	https://www.genecards.org/cgi-bin/carddisp.pl?gene=ARRB1
BMP6	Bone Morphogenetic Protein 6	Protein Coding	P22004	57	GC06P007726	0.473670065402985	https://www.genecards.org/cgi-bin/carddisp.pl?gene=BMP6
HES1	Hes Family BHLH Transcription Factor 1	Protein Coding	Q14469	57	GC03P194136	0.473670065402985	https://www.genecards.org/cgi-bin/carddisp.pl?gene=HES1
SLC7A11	Solute Carrier Family 7 Member 11	Protein Coding	Q9UPY5	57	GC04M138164	0.473670065402985	https://www.genecards.org/cgi-bin/carddisp.pl?gene=SLC7A11
ABCG1	ATP Binding Cassette Subfamily G Member 1	Protein Coding	P45844	56	GC21P042199	0.473670065402985	https://www.genecards.org/cgi-bin/carddisp.pl?gene=ABCG1
COX6B1	Cytochrome C Oxidase Subunit 6B1	Protein Coding	P14854	56	GC19P161958	0.473670065402985	https://www.genecards.org/cgi-bin/carddisp.pl?gene=COX6B1
EIF2B4	Eukaryotic Translation Initiation Factor 2B Subunit Delta	Protein Coding	Q9UI10	56	GC02M027364	0.473670065402985	https://www.genecards.org/cgi-bin/carddisp.pl?gene=EIF2B4
EIF4B	Eukaryotic Translation Initiation Factor 4B	Protein Coding	P23588	55	GC12P053006	0.473670065402985	https://www.genecards.org/cgi-bin/carddisp.pl?gene=EIF4B
IGFBP1	Insulin Like Growth Factor Binding Protein 1	Protein Coding	P08833	55	GC07P052244	0.473670065402985	https://www.genecards.org/cgi-bin/carddisp.pl?gene=IGFBP1
IL22	Interleukin 22	Protein Coding	Q9GZX6	55	GC12M068248	0.473670065402985	https://www.genecards.org/cgi-bin/carddisp.pl?gene=IL22
VAPA	VAMP Associated Protein A	Protein Coding	Q9P0L0	55	GC18P009938	0.473670065402985	https://www.genecards.org/cgi-bin/carddisp.pl?gene=VAPA
PRKRA	Protein Activator Of Interferon Induced Protein Kinase EIF2AK2	Protein Coding	O75569	54	GC02M178431	0.473670065402985	https://www.genecards.org/cgi-bin/carddisp.pl?gene=PRKRA
ATG13	Autophagy Related 13	Protein Coding	O75143	53	GC11P049465	0.473670065402985	https://www.genecards.org/cgi-bin/carddisp.pl?gene=ATG13
CTNNBIP1	Catenin Beta Interacting Protein 1	Protein Coding	Q9NSA3	53	GC01M009848	0.473670065402985	https://www.genecards.org/cgi-bin/carddisp.pl?gene=CTNNBIP1
MUC2	Mucin 2, Oligomeric Mucus/Gel-Forming	Protein Coding	Q02817	52	GC11P001074	0.473670065402985	https://www.genecards.org/cgi-bin/carddisp.pl?gene=MUC2
SERPINB7	Serpin Family B Member 7	Protein Coding	O75635	52	GC18P063752	0.473670065402985	https://www.genecards.org/cgi-bin/carddisp.pl?gene=SERPINB7
HOXB9	Homeobox B9	Protein Coding	P17482	51	GC17M048621	0.473670065402985	https://www.genecards.org/cgi-bin/carddisp.pl?gene=HOXB9
RNH1	Ribonuclease/Angiogenin Inhibitor 1	Protein Coding	P13489	50	GC11M015782	0.473670065402985	https://www.genecards.org/cgi-bin/carddisp.pl?gene=RNH1
LECT2	Leukocyte Cell Derived Chemotaxin 2	Protein Coding	O14960	49	GC05M135922	0.473670065402985	https://www.genecards.org/cgi-bin/carddisp.pl?gene=LECT2
NFYB	Nuclear Transcription Factor Y Subunit Beta	Protein Coding	P25208	49	GC12M104117	0.473670065402985	https://www.genecards.org/cgi-bin/carddisp.pl?gene=NFYB
PSME2	Proteasome Activator Subunit 2	Protein Coding	Q9UL46	49	GC14M024143	0.473670065402985	https://www.genecards.org/cgi-bin/carddisp.pl?gene=PSME2
ATAT1	Alpha Tubulin Acetyltransferase 1	Protein Coding	Q5SQI0	48	GC06P030626	0.473670065402985	https://www.genecards.org/cgi-bin/carddisp.pl?gene=ATAT1
SGMS2	Sphingomyelin Synthase 2	Protein Coding	Q8NHU3	47	GC04P107824	0.473670065402985	https://www.genecards.org/cgi-bin/carddisp.pl?gene=SGMS2
CDK5RAP3	CDK5 Regulatory Subunit Associated Protein 3	Protein Coding	Q96JB5	46	GC17P047967	0.473670065402985	https://www.genecards.org/cgi-bin/carddisp.pl?gene=CDK5RAP3
GRINA	Glutamate Ionotropic Receptor NMDA Type Subunit Associated Protein 1	Protein Coding	Q7Z429	46	GC08P143990	0.473670065402985	https://www.genecards.org/cgi-bin/carddisp.pl?gene=GRINA
IRGM	Immunity Related GTPase M	Protein Coding	A1A4Y4	44	GC05P150846	0.473670065402985	https://www.genecards.org/cgi-bin/carddisp.pl?gene=IRGM
FOXRED2	FAD Dependent Oxidoreductase Domain Containing 2	Protein Coding	Q8IWF2	40	GC22M036487	0.473670065402985	https://www.genecards.org/cgi-bin/carddisp.pl?gene=FOXRED2
MIR320A	MicroRNA 320a	RNA Gene		30	GC08M022506	0.473670065402985	https://www.genecards.org/cgi-bin/carddisp.pl?gene=MIR320A
MIR222	MicroRNA 222	RNA Gene		28	GC0XM045747	0.473670065402985	https://www.genecards.org/cgi-bin/carddisp.pl?gene=MIR222
COL4A2-AS2	COL4A2 Antisense RNA 2	RNA Gene		24	GC13M110455	0.473670065402985	https://www.genecards.org/cgi-bin/carddisp.pl?gene=COL4A2-AS2
LINC00355	Long Intergenic Non-Protein Coding RNA 355	RNA Gene		24	GC13M063838	0.473670065402985	https://www.genecards.org/cgi-bin/carddisp.pl?gene=LINC00355
MIR765	MicroRNA 765	RNA Gene		22	GC01M168725	0.473670065402985	https://www.genecards.org/cgi-bin/carddisp.pl?gene=MIR765
MIR384	MicroRNA 384	RNA Gene		14	GC0XM076919	0.473670065402985	https://www.genecards.org/cgi-bin/carddisp.pl?gene=MIR384
IGF1R	Insulin Like Growth Factor 1 Receptor	Protein Coding	P08069	68	GC15P098648	0.438533246517181	https://www.genecards.org/cgi-bin/carddisp.pl?gene=IGF1R
CHEK2	Checkpoint Kinase 2	Protein Coding	O96017	67	GC22M028687	0.438533246517181	https://www.genecards.org/cgi-bin/carddisp.pl?gene=CHEK2
GAPDH	Glyceraldehyde-3-Phosphate Dehydrogenase	Protein Coding	P04406	64	GC12P080272	0.438533246517181	https://www.genecards.org/cgi-bin/carddisp.pl?gene=GAPDH
PKM	Pyruvate Kinase M1/2	Protein Coding	P14618	63	GC15M072199	0.438533246517181	https://www.genecards.org/cgi-bin/carddisp.pl?gene=PKM
CDC25C	Cell Division Cycle 25C	Protein Coding	P30307	62	GC05M138285	0.438533246517181	https://www.genecards.org/cgi-bin/carddisp.pl?gene=CDC25C
CSNK1A1	Casein Kinase 1 Alpha 1	Protein Coding	P48729	62	GC05M149492	0.438533246517181	https://www.genecards.org/cgi-bin/carddisp.pl?gene=CSNK1A1
GATA4	GATA Binding Protein 4	Protein Coding	P43694	62	GC08P011676	0.438533246517181	https://www.genecards.org/cgi-bin/carddisp.pl?gene=GATA4
MMP3	Matrix Metallopeptidase 3	Protein Coding	P08254	62	GC11M102835	0.438533246517181	https://www.genecards.org/cgi-bin/carddisp.pl?gene=MMP3
NTRK1	Neurotrophic Receptor Tyrosine Kinase 1	Protein Coding	P04629	62	GC01P156815	0.438533246517181	https://www.genecards.org/cgi-bin/carddisp.pl?gene=NTRK1
TRPV1	Transient Receptor Potential Cation Channel Subfamily V Member 1	Protein Coding	Q8NER1	62	GC17M003565	0.438533246517181	https://www.genecards.org/cgi-bin/carddisp.pl?gene=TRPV1
F7	Coagulation Factor VII	Protein Coding	P08709	61	GC13P113105	0.438533246517181	https://www.genecards.org/cgi-bin/carddisp.pl?gene=F7
ACTG1	Actin Gamma 1	Protein Coding	P63261	60	GC17M081509	0.438533246517181	https://www.genecards.org/cgi-bin/carddisp.pl?gene=ACTG1
COL3A1	Collagen Type III Alpha 1 Chain	Protein Coding	P02461	60	GC02P188974	0.438533246517181	https://www.genecards.org/cgi-bin/carddisp.pl?gene=COL3A1
KCNN4	Potassium Calcium-Activated Channel Subfamily N Member 4	Protein Coding	O15554	60	GC19M112612	0.438533246517181	https://www.genecards.org/cgi-bin/carddisp.pl?gene=KCNN4
SLC2A4	Solute Carrier Family 2 Member 4	Protein Coding	P14672	60	GC17P164123	0.438533246517181	https://www.genecards.org/cgi-bin/carddisp.pl?gene=SLC2A4
USP9X	Ubiquitin Specific Peptidase 9 X-Linked	Protein Coding	Q93008	60	GC0XP041085	0.438533246517181	https://www.genecards.org/cgi-bin/carddisp.pl?gene=USP9X
ACTN2	Actinin Alpha 2	Protein Coding	P35609	59	GC01P236686	0.438533246517181	https://www.genecards.org/cgi-bin/carddisp.pl?gene=ACTN2
CTCF	CCCTC-Binding Factor	Protein Coding	P49711	59	GC16P129770	0.438533246517181	https://www.genecards.org/cgi-bin/carddisp.pl?gene=CTCF
LONP1	Lon Peptidase 1, Mitochondrial	Protein Coding	P36776	59	GC19M005691	0.438533246517181	https://www.genecards.org/cgi-bin/carddisp.pl?gene=LONP1
LPIN1	Lipin 1	Protein Coding	Q14693	59	GC02P011677	0.438533246517181	https://www.genecards.org/cgi-bin/carddisp.pl?gene=LPIN1
PINK1	PTEN Induced Kinase 1	Protein Coding	Q9BXM7	59	GC01P083848	0.438533246517181	https://www.genecards.org/cgi-bin/carddisp.pl?gene=PINK1
RAD23B	RAD23 Homolog B, Nucleotide Excision Repair Protein	Protein Coding	P54727	59	GC09P107283	0.438533246517181	https://www.genecards.org/cgi-bin/carddisp.pl?gene=RAD23B
UGT1A9	UDP Glucuronosyltransferase Family 1 Member A9	Protein Coding	O60656	59	GC02P233671	0.438533246517181	https://www.genecards.org/cgi-bin/carddisp.pl?gene=UGT1A9
CCNA2	Cyclin A2	Protein Coding	P20248	58	GC04M121816	0.438533246517181	https://www.genecards.org/cgi-bin/carddisp.pl?gene=CCNA2
PKD1	Polycystin 1, Transient Receptor Potential Channel Interacting	Protein Coding	P98161	58	GC16M052152	0.438533246517181	https://www.genecards.org/cgi-bin/carddisp.pl?gene=PKD1
ATP5F1B	ATP Synthase F1 Subunit Beta	Protein Coding	P06576	57	GC12M060685	0.438533246517181	https://www.genecards.org/cgi-bin/carddisp.pl?gene=ATP5F1B
COL4A3	Collagen Type IV Alpha 3 Chain	Protein Coding	Q01955	57	GC02P227164	0.438533246517181	https://www.genecards.org/cgi-bin/carddisp.pl?gene=COL4A3
FGF19	Fibroblast Growth Factor 19	Protein Coding	O95750	57	GC11M143141	0.438533246517181	https://www.genecards.org/cgi-bin/carddisp.pl?gene=FGF19
FLNC	Filamin C	Protein Coding	Q14315	57	GC07P128830	0.438533246517181	https://www.genecards.org/cgi-bin/carddisp.pl?gene=FLNC
GPX1	Glutathione Peroxidase 1	Protein Coding	P07203	57	GC03M055031	0.438533246517181	https://www.genecards.org/cgi-bin/carddisp.pl?gene=GPX1
MAP1B	Microtubule Associated Protein 1B	Protein Coding	P46821	57	GC05P072107	0.438533246517181	https://www.genecards.org/cgi-bin/carddisp.pl?gene=MAP1B
MC4R	Melanocortin 4 Receptor	Protein Coding	P32245	57	GC18M060371	0.438533246517181	https://www.genecards.org/cgi-bin/carddisp.pl?gene=MC4R
NEDD4L	NEDD4 Like E3 Ubiquitin Protein Ligase	Protein Coding	Q96PU5	57	GC18P058044	0.438533246517181	https://www.genecards.org/cgi-bin/carddisp.pl?gene=NEDD4L
TIMP1	TIMP Metallopeptidase Inhibitor 1	Protein Coding	P01033	57	GC0XP061588	0.438533246517181	https://www.genecards.org/cgi-bin/carddisp.pl?gene=TIMP1
BHMT	Betaine--Homocysteine S-Methyltransferase	Protein Coding	Q93088	56	GC05P079111	0.438533246517181	https://www.genecards.org/cgi-bin/carddisp.pl?gene=BHMT
CCT5	Chaperonin Containing TCP1 Subunit 5	Protein Coding	P48643	56	GC05P010249	0.438533246517181	https://www.genecards.org/cgi-bin/carddisp.pl?gene=CCT5
CXCL1	C-X-C Motif Chemokine Ligand 1	Protein Coding	P09341	56	GC04P073869	0.438533246517181	https://www.genecards.org/cgi-bin/carddisp.pl?gene=CXCL1
FOXM1	Forkhead Box M1	Protein Coding	Q08050	56	GC12M002857	0.438533246517181	https://www.genecards.org/cgi-bin/carddisp.pl?gene=FOXM1
GABARAPL2	GABA Type A Receptor Associated Protein Like 2	Protein Coding	P60520	56	GC16P075566	0.438533246517181	https://www.genecards.org/cgi-bin/carddisp.pl?gene=GABARAPL2
LDHB	Lactate Dehydrogenase B	Protein Coding	P07195	56	GC12M021635	0.438533246517181	https://www.genecards.org/cgi-bin/carddisp.pl?gene=LDHB
SLC39A8	Solute Carrier Family 39 Member 8	Protein Coding	Q9C0K1	56	GC04M102252	0.438533246517181	https://www.genecards.org/cgi-bin/carddisp.pl?gene=SLC39A8
ALG8	ALG8 Alpha-1,3-Glucosyltransferase	Protein Coding	Q9BVK2	55	GC11M143360	0.438533246517181	https://www.genecards.org/cgi-bin/carddisp.pl?gene=ALG8
CCT3	Chaperonin Containing TCP1 Subunit 3	Protein Coding	P49368	55	GC01M156308	0.438533246517181	https://www.genecards.org/cgi-bin/carddisp.pl?gene=CCT3
CUL5	Cullin 5	Protein Coding	Q93034	55	GC11P108008	0.438533246517181	https://www.genecards.org/cgi-bin/carddisp.pl?gene=CUL5
EPO	Erythropoietin	Protein Coding	P01588	55	GC07P100720	0.438533246517181	https://www.genecards.org/cgi-bin/carddisp.pl?gene=EPO
POMT2	Protein O-Mannosyltransferase 2	Protein Coding	Q9UKY4	55	GC14M077274	0.438533246517181	https://www.genecards.org/cgi-bin/carddisp.pl?gene=POMT2
PSMC4	Proteasome 26S Subunit, ATPase 4	Protein Coding	P43686	55	GC19P162065	0.438533246517181	https://www.genecards.org/cgi-bin/carddisp.pl?gene=PSMC4
PTX3	Pentraxin 3	Protein Coding	P26022	55	GC03P157436	0.438533246517181	https://www.genecards.org/cgi-bin/carddisp.pl?gene=PTX3
RASGRF1	Ras Protein Specific Guanine Nucleotide Releasing Factor 1	Protein Coding	Q13972	55	GC15M078959	0.438533246517181	https://www.genecards.org/cgi-bin/carddisp.pl?gene=RASGRF1
TFEB	Transcription Factor EB	Protein Coding	P19484	55	GC06M111771	0.438533246517181	https://www.genecards.org/cgi-bin/carddisp.pl?gene=TFEB
USP5	Ubiquitin Specific Peptidase 5	Protein Coding	P45974	55	GC12P080282	0.438533246517181	https://www.genecards.org/cgi-bin/carddisp.pl?gene=USP5
C9orf72	C9orf72-SMCR8 Complex Subunit	Protein Coding	Q96LT7	54	GC09M030300	0.438533246517181	https://www.genecards.org/cgi-bin/carddisp.pl?gene=C9orf72
PSMC2	Proteasome 26S Subunit, ATPase 2	Protein Coding	P35998	54	GC07P103328	0.438533246517181	https://www.genecards.org/cgi-bin/carddisp.pl?gene=PSMC2
REG1A	Regenerating Family Member 1 Alpha	Protein Coding	P05451	54	GC02P079120	0.438533246517181	https://www.genecards.org/cgi-bin/carddisp.pl?gene=REG1A
SLC30A8	Solute Carrier Family 30 Member 8	Protein Coding	Q8IWU4	54	GC08P116950	0.438533246517181	https://www.genecards.org/cgi-bin/carddisp.pl?gene=SLC30A8
BIK	BCL2 Interacting Killer	Protein Coding	Q13323	53	GC22P043110	0.438533246517181	https://www.genecards.org/cgi-bin/carddisp.pl?gene=BIK
COL10A1	Collagen Type X Alpha 1 Chain	Protein Coding	Q03692	53	GC06M116118	0.438533246517181	https://www.genecards.org/cgi-bin/carddisp.pl?gene=COL10A1
H1-2	H1.2 Linker Histone, Cluster Member	Protein Coding	P16403	53	GC06M110951	0.438533246517181	https://www.genecards.org/cgi-bin/carddisp.pl?gene=H1-2
RPL4	Ribosomal Protein L4	Protein Coding	P36578	53	GC15M066498	0.438533246517181	https://www.genecards.org/cgi-bin/carddisp.pl?gene=RPL4
ACTN3	Actinin Alpha 3	Protein Coding	Q08043	52	GC11P066546	0.438533246517181	https://www.genecards.org/cgi-bin/carddisp.pl?gene=ACTN3
CCT4	Chaperonin Containing TCP1 Subunit 4	Protein Coding	P50991	52	GC02M061868	0.438533246517181	https://www.genecards.org/cgi-bin/carddisp.pl?gene=CCT4
PHLPP1	PH Domain And Leucine Rich Repeat Protein Phosphatase 1	Protein Coding	O60346	52	GC18P062715	0.438533246517181	https://www.genecards.org/cgi-bin/carddisp.pl?gene=PHLPP1
MED25	Mediator Complex Subunit 25	Protein Coding	Q71SY5	51	GC19P162447	0.438533246517181	https://www.genecards.org/cgi-bin/carddisp.pl?gene=MED25
PSMD10	Proteasome 26S Subunit, Non-ATPase 10	Protein Coding	O75832	51	GC0XM108084	0.438533246517181	https://www.genecards.org/cgi-bin/carddisp.pl?gene=PSMD10
FGL1	Fibrinogen Like 1	Protein Coding	Q08830	50	GC08M017864	0.438533246517181	https://www.genecards.org/cgi-bin/carddisp.pl?gene=FGL1
GPR4	G Protein-Coupled Receptor 4	Protein Coding	P46093	50	GC19M045589	0.438533246517181	https://www.genecards.org/cgi-bin/carddisp.pl?gene=GPR4
SF3A2	Splicing Factor 3a Subunit 2	Protein Coding	Q15428	50	GC19P002236	0.438533246517181	https://www.genecards.org/cgi-bin/carddisp.pl?gene=SF3A2
CLN6	CLN6 Transmembrane ER Protein	Protein Coding	Q9NWW5	49	GC15M068206	0.438533246517181	https://www.genecards.org/cgi-bin/carddisp.pl?gene=CLN6
PHLPP2	PH Domain And Leucine Rich Repeat Protein Phosphatase 2	Protein Coding	Q6ZVD8	49	GC16M071637	0.438533246517181	https://www.genecards.org/cgi-bin/carddisp.pl?gene=PHLPP2
RASGRF2	Ras Protein Specific Guanine Nucleotide Releasing Factor 2	Protein Coding	O14827	49	GC05P080960	0.438533246517181	https://www.genecards.org/cgi-bin/carddisp.pl?gene=RASGRF2
H4C16	H4 Histone 16	Protein Coding	P62805	48	GC12M037490	0.438533246517181	https://www.genecards.org/cgi-bin/carddisp.pl?gene=H4C16
ADM2	Adrenomedullin 2	Protein Coding	Q7Z4H4	47	GC22P050481	0.438533246517181	https://www.genecards.org/cgi-bin/carddisp.pl?gene=ADM2
ERVW-1	Endogenous Retrovirus Group W Member 1, Envelope	Protein Coding	Q9UQF0	47	GC07M092468	0.438533246517181	https://www.genecards.org/cgi-bin/carddisp.pl?gene=ERVW-1
FNDC5	Fibronectin Type III Domain Containing 5	Protein Coding	Q8NAU1	47	GC01M037584	0.438533246517181	https://www.genecards.org/cgi-bin/carddisp.pl?gene=FNDC5
KCNK16	Potassium Two Pore Domain Channel Subfamily K Member 16	Protein Coding	Q96T55	47	GC06M111731	0.438533246517181	https://www.genecards.org/cgi-bin/carddisp.pl?gene=KCNK16
PDCD6	Programmed Cell Death 6	Protein Coding	O75340	47	GC05P006109	0.438533246517181	https://www.genecards.org/cgi-bin/carddisp.pl?gene=PDCD6
RNF114	Ring Finger Protein 114	Protein Coding	Q9Y508	47	GC20P049936	0.438533246517181	https://www.genecards.org/cgi-bin/carddisp.pl?gene=RNF114
NIBAN1	Niban Apoptosis Regulator 1	Protein Coding	Q9BZQ8	44	GC01M187165	0.438533246517181	https://www.genecards.org/cgi-bin/carddisp.pl?gene=NIBAN1
EMC6	ER Membrane Protein Complex Subunit 6	Protein Coding	Q9BV81	40	GC17P003668	0.438533246517181	https://www.genecards.org/cgi-bin/carddisp.pl?gene=EMC6
EMC7	ER Membrane Protein Complex Subunit 7	Protein Coding	Q9NPA0	40	GC15M034084	0.438533246517181	https://www.genecards.org/cgi-bin/carddisp.pl?gene=EMC7
USF3	Upstream Transcription Factor Family Member 3	Protein Coding	Q68DE3	39	GC03M113649	0.438533246517181	https://www.genecards.org/cgi-bin/carddisp.pl?gene=USF3
MIR185	MicroRNA 185	RNA Gene		30	GC22P096776	0.438533246517181	https://www.genecards.org/cgi-bin/carddisp.pl?gene=MIR185
MIR124-1	MicroRNA 124-1	RNA Gene		28	GC08M009903	0.438533246517181	https://www.genecards.org/cgi-bin/carddisp.pl?gene=MIR124-1
MIR221	MicroRNA 221	RNA Gene		28	GC0XM045746	0.438533246517181	https://www.genecards.org/cgi-bin/carddisp.pl?gene=MIR221
MIR16-2	MicroRNA 16-2	RNA Gene		27	GC03P160418	0.438533246517181	https://www.genecards.org/cgi-bin/carddisp.pl?gene=MIR16-2
MIR205	MicroRNA 205	RNA Gene		27	GC01P209432	0.438533246517181	https://www.genecards.org/cgi-bin/carddisp.pl?gene=MIR205
MIR519C	MicroRNA 519c	RNA Gene		25	GC19P053686	0.438533246517181	https://www.genecards.org/cgi-bin/carddisp.pl?gene=MIR519C
MIR124-3	MicroRNA 124-3	RNA Gene		24	GC20P069851	0.438533246517181	https://www.genecards.org/cgi-bin/carddisp.pl?gene=MIR124-3
CFTR-AS1	CFTR Antisense RNA 1	RNA Gene		20	GC07M117542	0.438533246517181	https://www.genecards.org/cgi-bin/carddisp.pl?gene=CFTR-AS1
EPM2A-DT	EPM2A Divergent Transcript	RNA Gene		18	GC06P192301	0.438533246517181	https://www.genecards.org/cgi-bin/carddisp.pl?gene=EPM2A-DT
MIR1257	MicroRNA 1257	RNA Gene		14	GC20M061953	0.438533246517181	https://www.genecards.org/cgi-bin/carddisp.pl?gene=MIR1257
LOC111674472	DNase I Hypersensitive Sites In Introns 16 And 17a Of CFTR	Functional Element		10	GC07P117607	0.438533246517181	https://www.genecards.org/cgi-bin/carddisp.pl?gene=LOC111674472
LOC111674477	CFTR Intron 23 Enhancer	Functional Element		10	GC07P117665	0.438533246517181	https://www.genecards.org/cgi-bin/carddisp.pl?gene=LOC111674477
MIR7975	MicroRNA 7975	RNA Gene		8	GC19M055123	0.438533246517181	https://www.genecards.org/cgi-bin/carddisp.pl?gene=MIR7975
LOC126806446	P300/CBP Strongly-Dependent Group 1 Enhancer GRCh37_chr2:189866210-189867409	Functional Element		7	GC02P189002	0.438533246517181	https://www.genecards.org/cgi-bin/carddisp.pl?gene=LOC126806446
LOC129997381	ATAC-STARR-Seq Lymphoblastoid Silent Region 17642	Functional Element		7	GC06P192306	0.438533246517181	https://www.genecards.org/cgi-bin/carddisp.pl?gene=LOC129997381
AGTR1	Angiotensin II Receptor Type 1	Protein Coding	P30556	65	GC03P148697	0.400324255228043	https://www.genecards.org/cgi-bin/carddisp.pl?gene=AGTR1
AR	Androgen Receptor	Protein Coding	P10275	65	GC0XP067544	0.400324255228043	https://www.genecards.org/cgi-bin/carddisp.pl?gene=AR
PRKCG	Protein Kinase C Gamma	Protein Coding	P05129	65	GC19P053879	0.400324255228043	https://www.genecards.org/cgi-bin/carddisp.pl?gene=PRKCG
RPS6KA3	Ribosomal Protein S6 Kinase A3	Protein Coding	P51812	65	GC0XM020149	0.400324255228043	https://www.genecards.org/cgi-bin/carddisp.pl?gene=RPS6KA3
FGFR4	Fibroblast Growth Factor Receptor 4	Protein Coding	P22455	64	GC05P177086	0.400324255228043	https://www.genecards.org/cgi-bin/carddisp.pl?gene=FGFR4
HSD11B1	Hydroxysteroid 11-Beta Dehydrogenase 1	Protein Coding	P28845	63	GC01P209686	0.400324255228043	https://www.genecards.org/cgi-bin/carddisp.pl?gene=HSD11B1
PRKDC	Protein Kinase, DNA-Activated, Catalytic Subunit	Protein Coding	P78527	63	GC08M047773	0.400324255228043	https://www.genecards.org/cgi-bin/carddisp.pl?gene=PRKDC
ACTN1	Actinin Alpha 1	Protein Coding	P12814	62	GC14M068874	0.400324255228043	https://www.genecards.org/cgi-bin/carddisp.pl?gene=ACTN1
APC	APC Regulator Of Wnt Signaling Pathway	Protein Coding	P25054	62	GC05P112707	0.400324255228043	https://www.genecards.org/cgi-bin/carddisp.pl?gene=APC
ARG1	Arginase 1	Protein Coding	P05089	62	GC06P191911	0.400324255228043	https://www.genecards.org/cgi-bin/carddisp.pl?gene=ARG1
C3	Complement C3	Protein Coding	P01024	62	GC19M006677	0.400324255228043	https://www.genecards.org/cgi-bin/carddisp.pl?gene=C3
FGA	Fibrinogen Alpha Chain	Protein Coding	P02671	62	GC04M154583	0.400324255228043	https://www.genecards.org/cgi-bin/carddisp.pl?gene=FGA
KRT18	Keratin 18	Protein Coding	P05783	62	GC12P052948	0.400324255228043	https://www.genecards.org/cgi-bin/carddisp.pl?gene=KRT18
TNFRSF1A	TNF Receptor Superfamily Member 1A	Protein Coding	P19438	62	GC12M006328	0.400324255228043	https://www.genecards.org/cgi-bin/carddisp.pl?gene=TNFRSF1A
CDH1	Cadherin 1	Protein Coding	P12830	61	GC16P068737	0.400324255228043	https://www.genecards.org/cgi-bin/carddisp.pl?gene=CDH1
IFNAR2	Interferon Alpha And Beta Receptor Subunit 2	Protein Coding	P48551	61	GC21P033229	0.400324255228043	https://www.genecards.org/cgi-bin/carddisp.pl?gene=IFNAR2
SPTAN1	Spectrin Alpha, Non-Erythrocytic 1	Protein Coding	Q13813	61	GC09P128552	0.400324255228043	https://www.genecards.org/cgi-bin/carddisp.pl?gene=SPTAN1
ACTA2	Actin Alpha 2, Smooth Muscle	Protein Coding	P62736	60	GC10M088935	0.400324255228043	https://www.genecards.org/cgi-bin/carddisp.pl?gene=ACTA2
APAF1	Apoptotic Peptidase Activating Factor 1	Protein Coding	O14727	60	GC12P098645	0.400324255228043	https://www.genecards.org/cgi-bin/carddisp.pl?gene=APAF1
EIF4A1	Eukaryotic Translation Initiation Factor 4A1	Protein Coding	P60842	60	GC17P007572	0.400324255228043	https://www.genecards.org/cgi-bin/carddisp.pl?gene=EIF4A1
GFAP	Glial Fibrillary Acidic Protein	Protein Coding	P14136	60	GC17M101088	0.400324255228043	https://www.genecards.org/cgi-bin/carddisp.pl?gene=GFAP
GRN	Granulin Precursor	Protein Coding	P28799	60	GC17P044345	0.400324255228043	https://www.genecards.org/cgi-bin/carddisp.pl?gene=GRN
KIF11	Kinesin Family Member 11	Protein Coding	P52732	60	GC10P092574	0.400324255228043	https://www.genecards.org/cgi-bin/carddisp.pl?gene=KIF11
MYH7	Myosin Heavy Chain 7	Protein Coding	P12883	60	GC14M023412	0.400324255228043	https://www.genecards.org/cgi-bin/carddisp.pl?gene=MYH7
PRMT5	Protein Arginine Methyltransferase 5	Protein Coding	O14744	60	GC14M022920	0.400324255228043	https://www.genecards.org/cgi-bin/carddisp.pl?gene=PRMT5
SCARB1	Scavenger Receptor Class B Member 1	Protein Coding	Q8WTV0	60	GC12M124776	0.400324255228043	https://www.genecards.org/cgi-bin/carddisp.pl?gene=SCARB1
TFAP2A	Transcription Factor AP-2 Alpha	Protein Coding	P05549	60	GC06M010393	0.400324255228043	https://www.genecards.org/cgi-bin/carddisp.pl?gene=TFAP2A
CD3D	CD3 Delta Subunit Of T-Cell Receptor Complex	Protein Coding	P04234	59	GC11M143818	0.400324255228043	https://www.genecards.org/cgi-bin/carddisp.pl?gene=CD3D
ERG	ETS Transcription Factor ERG	Protein Coding	P11308	59	GC21M038367	0.400324255228043	https://www.genecards.org/cgi-bin/carddisp.pl?gene=ERG
FBLN5	Fibulin 5	Protein Coding	Q9UBX5	59	GC14M091869	0.400324255228043	https://www.genecards.org/cgi-bin/carddisp.pl?gene=FBLN5
MTHFD1	Methylenetetrahydrofolate Dehydrogenase, Cyclohydrolase And Formyltetrahydrofolate Synthetase 1	Protein Coding	P11586	59	GC14P064388	0.400324255228043	https://www.genecards.org/cgi-bin/carddisp.pl?gene=MTHFD1
MYH11	Myosin Heavy Chain 11	Protein Coding	P35749	59	GC16M052663	0.400324255228043	https://www.genecards.org/cgi-bin/carddisp.pl?gene=MYH11
SLC25A12	Solute Carrier Family 25 Member 12	Protein Coding	O75746	59	GC02M171783	0.400324255228043	https://www.genecards.org/cgi-bin/carddisp.pl?gene=SLC25A12
SLC5A2	Solute Carrier Family 5 Member 2	Protein Coding	P31639	59	GC16P128994	0.400324255228043	https://www.genecards.org/cgi-bin/carddisp.pl?gene=SLC5A2
APOH	Apolipoprotein H	Protein Coding	P02749	58	GC17M066212	0.400324255228043	https://www.genecards.org/cgi-bin/carddisp.pl?gene=APOH
GJB2	Gap Junction Protein Beta 2	Protein Coding	P29033	58	GC13M020187	0.400324255228043	https://www.genecards.org/cgi-bin/carddisp.pl?gene=GJB2
PSMB4	Proteasome 20S Subunit Beta 4	Protein Coding	P28070	58	GC01P151399	0.400324255228043	https://www.genecards.org/cgi-bin/carddisp.pl?gene=PSMB4
E2F1	E2F Transcription Factor 1	Protein Coding	Q01094	57	GC20M033675	0.400324255228043	https://www.genecards.org/cgi-bin/carddisp.pl?gene=E2F1
EGLN2	Egl-9 Family Hypoxia Inducible Factor 2	Protein Coding	Q96KS0	57	GC19P162109	0.400324255228043	https://www.genecards.org/cgi-bin/carddisp.pl?gene=EGLN2
NONO	Non-POU Domain Containing Octamer Binding	Protein Coding	Q15233	57	GC0XP072106	0.400324255228043	https://www.genecards.org/cgi-bin/carddisp.pl?gene=NONO
EIF3F	Eukaryotic Translation Initiation Factor 3 Subunit F	Protein Coding	O00303	56	GC11P007970	0.400324255228043	https://www.genecards.org/cgi-bin/carddisp.pl?gene=EIF3F
GBF1	Golgi Brefeldin A Resistant Guanine Nucleotide Exchange Factor 1	Protein Coding	Q92538	56	GC10P128965	0.400324255228043	https://www.genecards.org/cgi-bin/carddisp.pl?gene=GBF1
HNRNPU	Heterogeneous Nuclear Ribonucleoprotein U	Protein Coding	Q00839	56	GC01M245002	0.400324255228043	https://www.genecards.org/cgi-bin/carddisp.pl?gene=HNRNPU
NR1I2	Nuclear Receptor Subfamily 1 Group I Member 2	Protein Coding	O75469	56	GC03P119780	0.400324255228043	https://www.genecards.org/cgi-bin/carddisp.pl?gene=NR1I2
PPM1A	Protein Phosphatase, Mg2+/Mn2+ Dependent 1A	Protein Coding	P35813	56	GC14P060245	0.400324255228043	https://www.genecards.org/cgi-bin/carddisp.pl?gene=PPM1A
RBX1	Ring-Box 1	Protein Coding	P62877	56	GC22P040951	0.400324255228043	https://www.genecards.org/cgi-bin/carddisp.pl?gene=RBX1
SFPQ	Splicing Factor Proline And Glutamine Rich	Protein Coding	P23246	56	GC01M035176	0.400324255228043	https://www.genecards.org/cgi-bin/carddisp.pl?gene=SFPQ
SOAT1	Sterol O-Acyltransferase 1	Protein Coding	P35610	56	GC01P180982	0.400324255228043	https://www.genecards.org/cgi-bin/carddisp.pl?gene=SOAT1
TRIM21	Tripartite Motif Containing 21	Protein Coding	P19474	56	GC11M004384	0.400324255228043	https://www.genecards.org/cgi-bin/carddisp.pl?gene=TRIM21
CCNA1	Cyclin A1	Protein Coding	P78396	55	GC13P036431	0.400324255228043	https://www.genecards.org/cgi-bin/carddisp.pl?gene=CCNA1
GNE	Glucosamine (UDP-N-Acetyl)-2-Epimerase/N-Acetylmannosamine Kinase	Protein Coding	Q9Y223	55	GC09M036214	0.400324255228043	https://www.genecards.org/cgi-bin/carddisp.pl?gene=GNE
PPM1B	Protein Phosphatase, Mg2+/Mn2+ Dependent 1B	Protein Coding	O75688	55	GC02P044167	0.400324255228043	https://www.genecards.org/cgi-bin/carddisp.pl?gene=PPM1B
SLC30A10	Solute Carrier Family 30 Member 10	Protein Coding	Q6XR72	55	GC01M219685	0.400324255228043	https://www.genecards.org/cgi-bin/carddisp.pl?gene=SLC30A10
SNCG	Synuclein Gamma	Protein Coding	O76070	55	GC10P128548	0.400324255228043	https://www.genecards.org/cgi-bin/carddisp.pl?gene=SNCG
UPF1	UPF1 RNA Helicase And ATPase	Protein Coding	Q92900	55	GC19P018831	0.400324255228043	https://www.genecards.org/cgi-bin/carddisp.pl?gene=UPF1
CXCL2	C-X-C Motif Chemokine Ligand 2	Protein Coding	P19875	54	GC04M074097	0.400324255228043	https://www.genecards.org/cgi-bin/carddisp.pl?gene=CXCL2
HDLBP	High Density Lipoprotein Binding Protein	Protein Coding	Q00341	54	GC02M241227	0.400324255228043	https://www.genecards.org/cgi-bin/carddisp.pl?gene=HDLBP
ACTL6A	Actin Like 6A	Protein Coding	O96019	53	GC03P179562	0.400324255228043	https://www.genecards.org/cgi-bin/carddisp.pl?gene=ACTL6A
ANKRD1	Ankyrin Repeat Domain 1	Protein Coding	Q15327	53	GC10M090912	0.400324255228043	https://www.genecards.org/cgi-bin/carddisp.pl?gene=ANKRD1
DEPTOR	DEP Domain Containing MTOR Interacting Protein	Protein Coding	Q8TB45	53	GC08P119873	0.400324255228043	https://www.genecards.org/cgi-bin/carddisp.pl?gene=DEPTOR
DKK3	Dickkopf Wnt Signaling Pathway Inhibitor 3	Protein Coding	Q9UBP4	53	GC11M016206	0.400324255228043	https://www.genecards.org/cgi-bin/carddisp.pl?gene=DKK3
KLB	Klotho Beta	Protein Coding	Q86Z14	53	GC04P040341	0.400324255228043	https://www.genecards.org/cgi-bin/carddisp.pl?gene=KLB
TULP1	TUB Like Protein 1	Protein Coding	O00294	53	GC06M111703	0.400324255228043	https://www.genecards.org/cgi-bin/carddisp.pl?gene=TULP1
EIF2S2	Eukaryotic Translation Initiation Factor 2 Subunit Beta	Protein Coding	P20042	52	GC20M034088	0.400324255228043	https://www.genecards.org/cgi-bin/carddisp.pl?gene=EIF2S2
HPSE2	Heparanase 2 (Inactive)	Protein Coding	Q8WWQ2	52	GC10M098457	0.400324255228043	https://www.genecards.org/cgi-bin/carddisp.pl?gene=HPSE2
ITLN1	Intelectin 1	Protein Coding	Q8WWA0	52	GC01M160876	0.400324255228043	https://www.genecards.org/cgi-bin/carddisp.pl?gene=ITLN1
PPM1G	Protein Phosphatase, Mg2+/Mn2+ Dependent 1G	Protein Coding	O15355	52	GC02M029328	0.400324255228043	https://www.genecards.org/cgi-bin/carddisp.pl?gene=PPM1G
GLRX3	Glutaredoxin 3	Protein Coding	O76003	51	GC10P130136	0.400324255228043	https://www.genecards.org/cgi-bin/carddisp.pl?gene=GLRX3
SAA4	Serum Amyloid A4, Constitutive	Protein Coding	P35542	51	GC11M018246	0.400324255228043	https://www.genecards.org/cgi-bin/carddisp.pl?gene=SAA4
BCL2L13	BCL2 Like 13	Protein Coding	Q9BXK5	50	GC22P017628	0.400324255228043	https://www.genecards.org/cgi-bin/carddisp.pl?gene=BCL2L13
EMC1	ER Membrane Protein Complex Subunit 1	Protein Coding	Q8N766	50	GC01M019215	0.400324255228043	https://www.genecards.org/cgi-bin/carddisp.pl?gene=EMC1
ERAP2	Endoplasmic Reticulum Aminopeptidase 2	Protein Coding	Q6P179	50	GC05P096875	0.400324255228043	https://www.genecards.org/cgi-bin/carddisp.pl?gene=ERAP2
IL23A	Interleukin 23 Subunit Alpha	Protein Coding	Q9NPF7	50	GC12P081650	0.400324255228043	https://www.genecards.org/cgi-bin/carddisp.pl?gene=IL23A
NSFL1C	NSFL1 Cofactor	Protein Coding	Q9UNZ2	50	GC20M001442	0.400324255228043	https://www.genecards.org/cgi-bin/carddisp.pl?gene=NSFL1C
UFC1	Ubiquitin-Fold Modifier Conjugating Enzyme 1	Protein Coding	Q9Y3C8	50	GC01P161152	0.400324255228043	https://www.genecards.org/cgi-bin/carddisp.pl?gene=UFC1
UGGT2	UDP-Glucose Glycoprotein Glucosyltransferase 2	Protein Coding	Q9NYU1	50	GC13M095801	0.400324255228043	https://www.genecards.org/cgi-bin/carddisp.pl?gene=UGGT2
USP19	Ubiquitin Specific Peptidase 19	Protein Coding	O94966	50	GC03M055016	0.400324255228043	https://www.genecards.org/cgi-bin/carddisp.pl?gene=USP19
WTAP	WT1 Associated Protein	Protein Coding	Q15007	50	GC06P159725	0.400324255228043	https://www.genecards.org/cgi-bin/carddisp.pl?gene=WTAP
EIF3D	Eukaryotic Translation Initiation Factor 3 Subunit D	Protein Coding	O15371	49	GC22M036510	0.400324255228043	https://www.genecards.org/cgi-bin/carddisp.pl?gene=EIF3D
EMC10	ER Membrane Protein Complex Subunit 10	Protein Coding	Q5UCC4	49	GC19P050476	0.400324255228043	https://www.genecards.org/cgi-bin/carddisp.pl?gene=EMC10
ILF3	Interleukin Enhancer Binding Factor 3	Protein Coding	Q12906	49	GC19P161367	0.400324255228043	https://www.genecards.org/cgi-bin/carddisp.pl?gene=ILF3
RTCB	RNA 2',3'-Cyclic Phosphate And 5'-OH Ligase	Protein Coding	Q9Y3I0	49	GC22M032387	0.400324255228043	https://www.genecards.org/cgi-bin/carddisp.pl?gene=RTCB
S100G	S100 Calcium Binding Protein G	Protein Coding	P29377	49	GC0XP016668	0.400324255228043	https://www.genecards.org/cgi-bin/carddisp.pl?gene=S100G
STK38	Serine/Threonine Kinase 38	Protein Coding	Q15208	49	GC06M036493	0.400324255228043	https://www.genecards.org/cgi-bin/carddisp.pl?gene=STK38
DNAJB12	DnaJ Heat Shock Protein Family (Hsp40) Member B12	Protein Coding	Q9NXW2	48	GC10M072332	0.400324255228043	https://www.genecards.org/cgi-bin/carddisp.pl?gene=DNAJB12
CCT6A	Chaperonin Containing TCP1 Subunit 6A	Protein Coding	P40227	47	GC07P056051	0.400324255228043	https://www.genecards.org/cgi-bin/carddisp.pl?gene=CCT6A
KCTD5	Potassium Channel Tetramerization Domain Containing 5	Protein Coding	Q9NXV2	47	GC16P002682	0.400324255228043	https://www.genecards.org/cgi-bin/carddisp.pl?gene=KCTD5
NUDT5	Nudix Hydrolase 5	Protein Coding	Q9UKK9	47	GC10M012165	0.400324255228043	https://www.genecards.org/cgi-bin/carddisp.pl?gene=NUDT5
ZBTB38	Zinc Finger And BTB Domain Containing 38	Protein Coding	Q8NAP3	47	GC03P141324	0.400324255228043	https://www.genecards.org/cgi-bin/carddisp.pl?gene=ZBTB38
EBI3	Epstein-Barr Virus Induced 3	Protein Coding	Q14213	46	GC19P161076	0.400324255228043	https://www.genecards.org/cgi-bin/carddisp.pl?gene=EBI3
KCTD2	Potassium Channel Tetramerization Domain Containing 2	Protein Coding	Q14681	46	GC17P075032	0.400324255228043	https://www.genecards.org/cgi-bin/carddisp.pl?gene=KCTD2
KLF9	KLF Transcription Factor 9	Protein Coding	Q13886	46	GC09M070384	0.400324255228043	https://www.genecards.org/cgi-bin/carddisp.pl?gene=KLF9
TRIM69	Tripartite Motif Containing 69	Protein Coding	Q86WT6	46	GC15P201729	0.400324255228043	https://www.genecards.org/cgi-bin/carddisp.pl?gene=TRIM69
C1QTNF9	C1q And TNF Related 9	Protein Coding	P0C862	44	GC13P024307	0.400324255228043	https://www.genecards.org/cgi-bin/carddisp.pl?gene=C1QTNF9
EMC2	ER Membrane Protein Complex Subunit 2	Protein Coding	Q15006	44	GC08P108443	0.400324255228043	https://www.genecards.org/cgi-bin/carddisp.pl?gene=EMC2
GPR78	G Protein-Coupled Receptor 78	Protein Coding	Q96P69	44	GC04P032025	0.400324255228043	https://www.genecards.org/cgi-bin/carddisp.pl?gene=GPR78
S100A16	S100 Calcium Binding Protein A16	Protein Coding	Q96FQ6	44	GC01M153606	0.400324255228043	https://www.genecards.org/cgi-bin/carddisp.pl?gene=S100A16
TMEM100	Transmembrane Protein 100	Protein Coding	Q9NV29	44	GC17M055719	0.400324255228043	https://www.genecards.org/cgi-bin/carddisp.pl?gene=TMEM100
CD2BP2	CD2 Cytoplasmic Tail Binding Protein 2	Protein Coding	O95400	43	GC16M030350	0.400324255228043	https://www.genecards.org/cgi-bin/carddisp.pl?gene=CD2BP2
DEFB104A	Defensin Beta 104A	Protein Coding	Q8WTQ1	43	GC08P007836	0.400324255228043	https://www.genecards.org/cgi-bin/carddisp.pl?gene=DEFB104A
EMC8	ER Membrane Protein Complex Subunit 8	Protein Coding	O43402	42	GC16M085771	0.400324255228043	https://www.genecards.org/cgi-bin/carddisp.pl?gene=EMC8
DEFB125	Defensin Beta 125	Protein Coding	Q8N687	41	GC20P000087	0.400324255228043	https://www.genecards.org/cgi-bin/carddisp.pl?gene=DEFB125
EMC3	ER Membrane Protein Complex Subunit 3	Protein Coding	Q9P0I2	41	GC03M011110	0.400324255228043	https://www.genecards.org/cgi-bin/carddisp.pl?gene=EMC3
EMC4	ER Membrane Protein Complex Subunit 4	Protein Coding	Q5J8M3	41	GC15P201445	0.400324255228043	https://www.genecards.org/cgi-bin/carddisp.pl?gene=EMC4
DEFB126	Defensin Beta 126	Protein Coding	Q9BYW3	39	GC20P000142	0.400324255228043	https://www.genecards.org/cgi-bin/carddisp.pl?gene=DEFB126
BCL2L15	BCL2 Like 15	Protein Coding	Q5TBC7	38	GC01M113876	0.400324255228043	https://www.genecards.org/cgi-bin/carddisp.pl?gene=BCL2L15
DEFB124	Defensin Beta 124	Protein Coding	Q8NES8	36	GC20M031465	0.400324255228043	https://www.genecards.org/cgi-bin/carddisp.pl?gene=DEFB124
MIAT	Myocardial Infarction Associated Transcript	RNA Gene		33	GC22P026646	0.400324255228043	https://www.genecards.org/cgi-bin/carddisp.pl?gene=MIAT
MIR200C	MicroRNA 200c	RNA Gene		30	GC12P080296	0.400324255228043	https://www.genecards.org/cgi-bin/carddisp.pl?gene=MIR200C
MIR34A	MicroRNA 34a	RNA Gene		30	GC01M009151	0.400324255228043	https://www.genecards.org/cgi-bin/carddisp.pl?gene=MIR34A
MIRLET7C	MicroRNA Let-7c	RNA Gene		30	GC21P021916	0.400324255228043	https://www.genecards.org/cgi-bin/carddisp.pl?gene=MIRLET7C
MIR483	MicroRNA 483	RNA Gene		29	GC11M015861	0.400324255228043	https://www.genecards.org/cgi-bin/carddisp.pl?gene=MIR483
HULC	Hepatocellular Carcinoma Up-Regulated Long Non-Coding RNA	RNA Gene		28	GC06P013430	0.400324255228043	https://www.genecards.org/cgi-bin/carddisp.pl?gene=HULC
SNHG14	Small Nucleolar RNA Host Gene 14	RNA Gene		26	GC15P201074	0.400324255228043	https://www.genecards.org/cgi-bin/carddisp.pl?gene=SNHG14
MIR101-2	MicroRNA 101-2	RNA Gene		24	GC09P004867	0.400324255228043	https://www.genecards.org/cgi-bin/carddisp.pl?gene=MIR101-2
BANCR	BRAF-Activated Non-Protein Coding RNA	RNA Gene		20	GC09M069296	0.400324255228043	https://www.genecards.org/cgi-bin/carddisp.pl?gene=BANCR
PPP1R13B-DT	PPP1R13B Divergent Transcript	RNA Gene		18	GC14P122586	0.400324255228043	https://www.genecards.org/cgi-bin/carddisp.pl?gene=PPP1R13B-DT
HCP5B	HLA Complex P5B	RNA Gene		17	GC06M113030	0.400324255228043	https://www.genecards.org/cgi-bin/carddisp.pl?gene=HCP5B
TRD-GTC9-1	TRNA-Asp (Anticodon GTC) 9-1	RNA Gene		14	GC01P180362	0.400324255228043	https://www.genecards.org/cgi-bin/carddisp.pl?gene=TRD-GTC9-1
MSBP2	Minisatellite Binding Protein 2	Protein Coding		5	GC00U990214	0.400324255228043	https://www.genecards.org/cgi-bin/carddisp.pl?gene=MSBP2
MDM2	MDM2 Proto-Oncogene	Protein Coding	Q00987	66	GC12P068808	0.358060896396637	https://www.genecards.org/cgi-bin/carddisp.pl?gene=MDM2
MMP9	Matrix Metallopeptidase 9	Protein Coding	P14780	66	GC20P046008	0.358060896396637	https://www.genecards.org/cgi-bin/carddisp.pl?gene=MMP9
SMAD2	SMAD Family Member 2	Protein Coding	Q15796	65	GC18M047809	0.358060896396637	https://www.genecards.org/cgi-bin/carddisp.pl?gene=SMAD2
HDAC1	Histone Deacetylase 1	Protein Coding	Q13547	64	GC01P032292	0.358060896396637	https://www.genecards.org/cgi-bin/carddisp.pl?gene=HDAC1
ACTB	Actin Beta	Protein Coding	P60709	63	GC07M005922	0.358060896396637	https://www.genecards.org/cgi-bin/carddisp.pl?gene=ACTB
CDK2	Cyclin Dependent Kinase 2	Protein Coding	P24941	63	GC12P055966	0.358060896396637	https://www.genecards.org/cgi-bin/carddisp.pl?gene=CDK2
DNM2	Dynamin 2	Protein Coding	P50570	63	GC19P010718	0.358060896396637	https://www.genecards.org/cgi-bin/carddisp.pl?gene=DNM2
GRIN1	Glutamate Ionotropic Receptor NMDA Type Subunit 1	Protein Coding	Q05586	63	GC09P137138	0.358060896396637	https://www.genecards.org/cgi-bin/carddisp.pl?gene=GRIN1
KAT2A	Lysine Acetyltransferase 2A	Protein Coding	Q92830	63	GC17M042113	0.358060896396637	https://www.genecards.org/cgi-bin/carddisp.pl?gene=KAT2A
LDHA	Lactate Dehydrogenase A	Protein Coding	P00338	63	GC11P018394	0.358060896396637	https://www.genecards.org/cgi-bin/carddisp.pl?gene=LDHA
NPM1	Nucleophosmin 1	Protein Coding	P06748	63	GC05P171387	0.358060896396637	https://www.genecards.org/cgi-bin/carddisp.pl?gene=NPM1
TUBB3	Tubulin Beta 3 Class III	Protein Coding	Q13509	63	GC16P130848	0.358060896396637	https://www.genecards.org/cgi-bin/carddisp.pl?gene=TUBB3
KAT2B	Lysine Acetyltransferase 2B	Protein Coding	Q92831	62	GC03P028992	0.358060896396637	https://www.genecards.org/cgi-bin/carddisp.pl?gene=KAT2B
MMP13	Matrix Metallopeptidase 13	Protein Coding	P45452	62	GC11M102942	0.358060896396637	https://www.genecards.org/cgi-bin/carddisp.pl?gene=MMP13
NR3C1	Nuclear Receptor Subfamily 3 Group C Member 1	Protein Coding	P04150	62	GC05M143277	0.358060896396637	https://www.genecards.org/cgi-bin/carddisp.pl?gene=NR3C1
RUNX1	RUNX Family Transcription Factor 1	Protein Coding	Q01196	62	GC21M034787	0.358060896396637	https://www.genecards.org/cgi-bin/carddisp.pl?gene=RUNX1
SERPINC1	Serpin Family C Member 1	Protein Coding	P01008	62	GC01M175210	0.358060896396637	https://www.genecards.org/cgi-bin/carddisp.pl?gene=SERPINC1
CASP6	Caspase 6	Protein Coding	P55212	61	GC04M109688	0.358060896396637	https://www.genecards.org/cgi-bin/carddisp.pl?gene=CASP6
MAPKAPK2	MAPK Activated Protein Kinase 2	Protein Coding	P49137	61	GC01P206684	0.358060896396637	https://www.genecards.org/cgi-bin/carddisp.pl?gene=MAPKAPK2
REN	Renin	Protein Coding	P00797	61	GC01M204154	0.358060896396637	https://www.genecards.org/cgi-bin/carddisp.pl?gene=REN
FBN1	Fibrillin 1	Protein Coding	P35555	60	GC15M048408	0.358060896396637	https://www.genecards.org/cgi-bin/carddisp.pl?gene=FBN1
GPX4	Glutathione Peroxidase 4	Protein Coding	P36969	60	GC19P001103	0.358060896396637	https://www.genecards.org/cgi-bin/carddisp.pl?gene=GPX4
OAT	Ornithine Aminotransferase	Protein Coding	P04181	60	GC10M124397	0.358060896396637	https://www.genecards.org/cgi-bin/carddisp.pl?gene=OAT
P2RX7	Purinergic Receptor P2X 7	Protein Coding	Q99572	60	GC12P140359	0.358060896396637	https://www.genecards.org/cgi-bin/carddisp.pl?gene=P2RX7
RUNX2	RUNX Family Transcription Factor 2	Protein Coding	Q13950	60	GC06P190902	0.358060896396637	https://www.genecards.org/cgi-bin/carddisp.pl?gene=RUNX2
SGSH	N-Sulfoglucosamine Sulfohydrolase	Protein Coding	P51688	60	GC17M101950	0.358060896396637	https://www.genecards.org/cgi-bin/carddisp.pl?gene=SGSH
SLC6A2	Solute Carrier Family 6 Member 2	Protein Coding	P23975	60	GC16P129458	0.358060896396637	https://www.genecards.org/cgi-bin/carddisp.pl?gene=SLC6A2
TTN	Titin	Protein Coding	Q8WZ42	60	GC02M178525	0.358060896396637	https://www.genecards.org/cgi-bin/carddisp.pl?gene=TTN
VHL	Von Hippel-Lindau Tumor Suppressor	Protein Coding	P40337	60	GC03P028787	0.358060896396637	https://www.genecards.org/cgi-bin/carddisp.pl?gene=VHL
CYP1A2	Cytochrome P450 Family 1 Subfamily A Member 2	Protein Coding	P05177	59	GC15P074748	0.358060896396637	https://www.genecards.org/cgi-bin/carddisp.pl?gene=CYP1A2
CYP2C9	Cytochrome P450 Family 2 Subfamily C Member 9	Protein Coding	P11712	59	GC10P094938	0.358060896396637	https://www.genecards.org/cgi-bin/carddisp.pl?gene=CYP2C9
DLST	Dihydrolipoamide S-Succinyltransferase	Protein Coding	P36957	59	GC14P074881	0.358060896396637	https://www.genecards.org/cgi-bin/carddisp.pl?gene=DLST
EPHX2	Epoxide Hydrolase 2	Protein Coding	P34913	59	GC08P027490	0.358060896396637	https://www.genecards.org/cgi-bin/carddisp.pl?gene=EPHX2
HNRNPA2B1	Heterogeneous Nuclear Ribonucleoprotein A2/B1	Protein Coding	P22626	59	GC07M026174	0.358060896396637	https://www.genecards.org/cgi-bin/carddisp.pl?gene=HNRNPA2B1
HUWE1	HECT, UBA And WWE Domain Containing E3 Ubiquitin Protein Ligase 1	Protein Coding	Q7Z6Z7	59	GC0XM053532	0.358060896396637	https://www.genecards.org/cgi-bin/carddisp.pl?gene=HUWE1
MAN1B1	Mannosidase Alpha Class 1B Member 1	Protein Coding	Q9UKM7	59	GC09P137086	0.358060896396637	https://www.genecards.org/cgi-bin/carddisp.pl?gene=MAN1B1
MEF2A	Myocyte Enhancer Factor 2A	Protein Coding	Q02078	59	GC15P099565	0.358060896396637	https://www.genecards.org/cgi-bin/carddisp.pl?gene=MEF2A
MAP3K8	Mitogen-Activated Protein Kinase Kinase Kinase 8	Protein Coding	P41279	58	GC10P031378	0.358060896396637	https://www.genecards.org/cgi-bin/carddisp.pl?gene=MAP3K8
SEMA3A	Semaphorin 3A	Protein Coding	Q14563	58	GC07M083955	0.358060896396637	https://www.genecards.org/cgi-bin/carddisp.pl?gene=SEMA3A
ARID1A	AT-Rich Interaction Domain 1A	Protein Coding	O14497	57	GC01P026693	0.358060896396637	https://www.genecards.org/cgi-bin/carddisp.pl?gene=ARID1A
CALB1	Calbindin 1	Protein Coding	P05937	57	GC08M090058	0.358060896396637	https://www.genecards.org/cgi-bin/carddisp.pl?gene=CALB1
CASP5	Caspase 5	Protein Coding	P51878	57	GC11M143627	0.358060896396637	https://www.genecards.org/cgi-bin/carddisp.pl?gene=CASP5
CGA	Glycoprotein Hormones, Alpha Polypeptide	Protein Coding	P01215	57	GC06M087085	0.358060896396637	https://www.genecards.org/cgi-bin/carddisp.pl?gene=CGA
CHRNE	Cholinergic Receptor Nicotinic Epsilon Subunit	Protein Coding	Q04844	57	GC17M004897	0.358060896396637	https://www.genecards.org/cgi-bin/carddisp.pl?gene=CHRNE
GLO1	Glyoxalase I	Protein Coding	Q04760	57	GC06M111723	0.358060896396637	https://www.genecards.org/cgi-bin/carddisp.pl?gene=GLO1
GPD2	Glycerol-3-Phosphate Dehydrogenase 2	Protein Coding	P43304	57	GC02P158108	0.358060896396637	https://www.genecards.org/cgi-bin/carddisp.pl?gene=GPD2
IL10RA	Interleukin 10 Receptor Subunit Alpha	Protein Coding	Q13651	57	GC11P128257	0.358060896396637	https://www.genecards.org/cgi-bin/carddisp.pl?gene=IL10RA
KAT6B	Lysine Acetyltransferase 6B	Protein Coding	Q8WYB5	57	GC10P076489	0.358060896396637	https://www.genecards.org/cgi-bin/carddisp.pl?gene=KAT6B
NAGLU	N-Acetyl-Alpha-Glucosaminidase	Protein Coding	P54802	57	GC17P165237	0.358060896396637	https://www.genecards.org/cgi-bin/carddisp.pl?gene=NAGLU
PFKL	Phosphofructokinase, Liver Type	Protein Coding	P17858	57	GC21P044300	0.358060896396637	https://www.genecards.org/cgi-bin/carddisp.pl?gene=PFKL
SLC8A1	Solute Carrier Family 8 Member A1	Protein Coding	P32418	57	GC02M040078	0.358060896396637	https://www.genecards.org/cgi-bin/carddisp.pl?gene=SLC8A1
TG	Thyroglobulin	Protein Coding	P01266	57	GC08P132866	0.358060896396637	https://www.genecards.org/cgi-bin/carddisp.pl?gene=TG
TRRAP	Transformation/Transcription Domain Associated Protein	Protein Coding	Q9Y4A5	57	GC07P098877	0.358060896396637	https://www.genecards.org/cgi-bin/carddisp.pl?gene=TRRAP
TUFM	Tu Translation Elongation Factor, Mitochondrial	Protein Coding	P49411	57	GC16M053150	0.358060896396637	https://www.genecards.org/cgi-bin/carddisp.pl?gene=TUFM
XRCC5	X-Ray Repair Cross Complementing 5	Protein Coding	P13010	57	GC02P216107	0.358060896396637	https://www.genecards.org/cgi-bin/carddisp.pl?gene=XRCC5
CALCA	Calcitonin Related Polypeptide Alpha	Protein Coding	P06881	56	GC11M014966	0.358060896396637	https://www.genecards.org/cgi-bin/carddisp.pl?gene=CALCA
CAV3	Caveolin 3	Protein Coding	P56539	56	GC03P008733	0.358060896396637	https://www.genecards.org/cgi-bin/carddisp.pl?gene=CAV3
CD82	CD82 Molecule	Protein Coding	P27701	56	GC11P044564	0.358060896396637	https://www.genecards.org/cgi-bin/carddisp.pl?gene=CD82
DDX1	DEAD-Box Helicase 1	Protein Coding	Q92499	56	GC02P015591	0.358060896396637	https://www.genecards.org/cgi-bin/carddisp.pl?gene=DDX1
EFEMP1	EGF Containing Fibulin Extracellular Matrix Protein 1	Protein Coding	Q12805	56	GC02M055865	0.358060896396637	https://www.genecards.org/cgi-bin/carddisp.pl?gene=EFEMP1
ELN	Elastin	Protein Coding	P15502	56	GC07P074027	0.358060896396637	https://www.genecards.org/cgi-bin/carddisp.pl?gene=ELN
FGF14	Fibroblast Growth Factor 14	Protein Coding	Q92915	56	GC13M101710	0.358060896396637	https://www.genecards.org/cgi-bin/carddisp.pl?gene=FGF14
FZR1	Fizzy And Cell Division Cycle 20 Related 1	Protein Coding	Q9UM11	56	GC19P003506	0.358060896396637	https://www.genecards.org/cgi-bin/carddisp.pl?gene=FZR1
IGF2BP2	Insulin Like Growth Factor 2 MRNA Binding Protein 2	Protein Coding	Q9Y6M1	56	GC03M185643	0.358060896396637	https://www.genecards.org/cgi-bin/carddisp.pl?gene=IGF2BP2
OLR1	Oxidized Low Density Lipoprotein Receptor 1	Protein Coding	P78380	56	GC12M037044	0.358060896396637	https://www.genecards.org/cgi-bin/carddisp.pl?gene=OLR1
PSMA2	Proteasome 20S Subunit Alpha 2	Protein Coding	P25787	56	GC07M042916	0.358060896396637	https://www.genecards.org/cgi-bin/carddisp.pl?gene=PSMA2
RIPK3	Receptor Interacting Serine/Threonine Kinase 3	Protein Coding	Q9Y572	56	GC14M024336	0.358060896396637	https://www.genecards.org/cgi-bin/carddisp.pl?gene=RIPK3
RUNX3	RUNX Family Transcription Factor 3	Protein Coding	Q13761	56	GC01M024899	0.358060896396637	https://www.genecards.org/cgi-bin/carddisp.pl?gene=RUNX3
TRPM7	Transient Receptor Potential Cation Channel Subfamily M Member 7	Protein Coding	Q96QT4	56	GC15M050552	0.358060896396637	https://www.genecards.org/cgi-bin/carddisp.pl?gene=TRPM7
CDC27	Cell Division Cycle 27	Protein Coding	P30260	55	GC17M047117	0.358060896396637	https://www.genecards.org/cgi-bin/carddisp.pl?gene=CDC27
CERS1	Ceramide Synthase 1	Protein Coding	P27544	55	GC19M018868	0.358060896396637	https://www.genecards.org/cgi-bin/carddisp.pl?gene=CERS1
HNRNPD	Heterogeneous Nuclear Ribonucleoprotein D	Protein Coding	Q14103	55	GC04M082352	0.358060896396637	https://www.genecards.org/cgi-bin/carddisp.pl?gene=HNRNPD
HNRNPH1	Heterogeneous Nuclear Ribonucleoprotein H1	Protein Coding	P31943	55	GC05M179614	0.358060896396637	https://www.genecards.org/cgi-bin/carddisp.pl?gene=HNRNPH1
IGF2BP3	Insulin Like Growth Factor 2 MRNA Binding Protein 3	Protein Coding	O00425	55	GC07M023875	0.358060896396637	https://www.genecards.org/cgi-bin/carddisp.pl?gene=IGF2BP3
KRT16	Keratin 16	Protein Coding	P08779	55	GC17M041609	0.358060896396637	https://www.genecards.org/cgi-bin/carddisp.pl?gene=KRT16
OSGEP	O-Sialoglycoprotein Endopeptidase	Protein Coding	Q9NPF4	55	GC14M020446	0.358060896396637	https://www.genecards.org/cgi-bin/carddisp.pl?gene=OSGEP
PNPLA3	Patatin Like Domain 3, 1-Acylglycerol-3-Phosphate O-Acyltransferase	Protein Coding	Q9NST1	55	GC22P043923	0.358060896396637	https://www.genecards.org/cgi-bin/carddisp.pl?gene=PNPLA3
ROBO4	Roundabout Guidance Receptor 4	Protein Coding	Q8WZ75	55	GC11M124883	0.358060896396637	https://www.genecards.org/cgi-bin/carddisp.pl?gene=ROBO4
SLC25A5	Solute Carrier Family 25 Member 5	Protein Coding	P05141	55	GC0XP119468	0.358060896396637	https://www.genecards.org/cgi-bin/carddisp.pl?gene=SLC25A5
SLIT3	Slit Guidance Ligand 3	Protein Coding	O75094	55	GC05M168661	0.358060896396637	https://www.genecards.org/cgi-bin/carddisp.pl?gene=SLIT3
TNFRSF12A	TNF Receptor Superfamily Member 12A	Protein Coding	Q9NP84	55	GC16P003018	0.358060896396637	https://www.genecards.org/cgi-bin/carddisp.pl?gene=TNFRSF12A
ATXN7	Ataxin 7	Protein Coding	O15265	54	GC03P067246	0.358060896396637	https://www.genecards.org/cgi-bin/carddisp.pl?gene=ATXN7
KHSRP	KH-Type Splicing Regulatory Protein	Protein Coding	Q92945	54	GC19M006413	0.358060896396637	https://www.genecards.org/cgi-bin/carddisp.pl?gene=KHSRP
TAF4	TATA-Box Binding Protein Associated Factor 4	Protein Coding	O00268	54	GC20M062012	0.358060896396637	https://www.genecards.org/cgi-bin/carddisp.pl?gene=TAF4
TRNT1	TRNA Nucleotidyl Transferase 1	Protein Coding	Q96Q11	54	GC03P003126	0.358060896396637	https://www.genecards.org/cgi-bin/carddisp.pl?gene=TRNT1
CDIPT	CDP-Diacylglycerol--Inositol 3-Phosphatidyltransferase	Protein Coding	O14735	53	GC16M053273	0.358060896396637	https://www.genecards.org/cgi-bin/carddisp.pl?gene=CDIPT
CNOT1	CCR4-NOT Transcription Complex Subunit 1	Protein Coding	A5YKK6	53	GC16M058519	0.358060896396637	https://www.genecards.org/cgi-bin/carddisp.pl?gene=CNOT1
ELAVL2	ELAV Like RNA Binding Protein 2	Protein Coding	Q12926	53	GC09M023690	0.358060896396637	https://www.genecards.org/cgi-bin/carddisp.pl?gene=ELAVL2
HKDC1	Hexokinase Domain Containing 1	Protein Coding	Q2TB90	53	GC10P069220	0.358060896396637	https://www.genecards.org/cgi-bin/carddisp.pl?gene=HKDC1
IL11	Interleukin 11	Protein Coding	P20809	53	GC19M055364	0.358060896396637	https://www.genecards.org/cgi-bin/carddisp.pl?gene=IL11
IMMT	Inner Membrane Mitochondrial Protein	Protein Coding	Q16891	53	GC02M086144	0.358060896396637	https://www.genecards.org/cgi-bin/carddisp.pl?gene=IMMT
MARCKS	Myristoylated Alanine Rich Protein Kinase C Substrate	Protein Coding	P29966	53	GC06P113857	0.358060896396637	https://www.genecards.org/cgi-bin/carddisp.pl?gene=MARCKS
MLC1	Modulator Of VRAC Current 1	Protein Coding	Q15049	53	GC22M050059	0.358060896396637	https://www.genecards.org/cgi-bin/carddisp.pl?gene=MLC1
RARRES1	Retinoic Acid Receptor Responder 1	Protein Coding	P49788	53	GC03M158696	0.358060896396637	https://www.genecards.org/cgi-bin/carddisp.pl?gene=RARRES1
RBM8A	RNA Binding Motif Protein 8A	Protein Coding	Q9Y5S9	53	GC01M145921	0.358060896396637	https://www.genecards.org/cgi-bin/carddisp.pl?gene=RBM8A
SCAP	SREBF Chaperone	Protein Coding	Q12770	53	GC03M047413	0.358060896396637	https://www.genecards.org/cgi-bin/carddisp.pl?gene=SCAP
SF3B3	Splicing Factor 3b Subunit 3	Protein Coding	Q15393	53	GC16P070523	0.358060896396637	https://www.genecards.org/cgi-bin/carddisp.pl?gene=SF3B3
TRPM2	Transient Receptor Potential Cation Channel Subfamily M Member 2	Protein Coding	O94759	53	GC21P044350	0.358060896396637	https://www.genecards.org/cgi-bin/carddisp.pl?gene=TRPM2
USP22	Ubiquitin Specific Peptidase 22	Protein Coding	Q9UPT9	53	GC17M020999	0.358060896396637	https://www.genecards.org/cgi-bin/carddisp.pl?gene=USP22
ATG10	Autophagy Related 10	Protein Coding	Q9H0Y0	52	GC05P081972	0.358060896396637	https://www.genecards.org/cgi-bin/carddisp.pl?gene=ATG10
CHM	CHM Rab Escort Protein	Protein Coding	P24386	52	GC0XM085861	0.358060896396637	https://www.genecards.org/cgi-bin/carddisp.pl?gene=CHM
CHMP1A	Charged Multivesicular Body Protein 1A	Protein Coding	Q9HD42	52	GC16M089644	0.358060896396637	https://www.genecards.org/cgi-bin/carddisp.pl?gene=CHMP1A
DAP3	Death Associated Protein 3	Protein Coding	P51398	52	GC01P180084	0.358060896396637	https://www.genecards.org/cgi-bin/carddisp.pl?gene=DAP3
ERO1B	Endoplasmic Reticulum Oxidoreductase 1 Beta	Protein Coding	Q86YB8	52	GC01M236216	0.358060896396637	https://www.genecards.org/cgi-bin/carddisp.pl?gene=ERO1B
MOV10	Mov10 RNA Helicase	Protein Coding	Q9HCE1	52	GC01P112673	0.358060896396637	https://www.genecards.org/cgi-bin/carddisp.pl?gene=MOV10
SLC39A13	Solute Carrier Family 39 Member 13	Protein Coding	Q96H72	52	GC11P047407	0.358060896396637	https://www.genecards.org/cgi-bin/carddisp.pl?gene=SLC39A13
TAF2	TATA-Box Binding Protein Associated Factor 2	Protein Coding	Q6P1X5	52	GC08M119730	0.358060896396637	https://www.genecards.org/cgi-bin/carddisp.pl?gene=TAF2
TAF6	TATA-Box Binding Protein Associated Factor 6	Protein Coding	P49848	52	GC07M107029	0.358060896396637	https://www.genecards.org/cgi-bin/carddisp.pl?gene=TAF6
TAF9	TATA-Box Binding Protein Associated Factor 9	Protein Coding	Q16594	52	GC05M081843	0.358060896396637	https://www.genecards.org/cgi-bin/carddisp.pl?gene=TAF9
TSC22D3	TSC22 Domain Family Member 3	Protein Coding	Q99576	52	GC0XM107713	0.358060896396637	https://www.genecards.org/cgi-bin/carddisp.pl?gene=TSC22D3
UBA5	Ubiquitin Like Modifier Activating Enzyme 5	Protein Coding	Q9GZZ9	52	GC03P132654	0.358060896396637	https://www.genecards.org/cgi-bin/carddisp.pl?gene=UBA5
BOK	BCL2 Family Apoptosis Regulator BOK	Protein Coding	Q9UMX3	51	GC02P242745	0.358060896396637	https://www.genecards.org/cgi-bin/carddisp.pl?gene=BOK
MICA	MHC Class I Polypeptide-Related Sequence A	Protein Coding	Q29983	51	GC06P031399	0.358060896396637	https://www.genecards.org/cgi-bin/carddisp.pl?gene=MICA
NCBP2	Nuclear Cap Binding Protein Subunit 2	Protein Coding	P52298	51	GC03M196935	0.358060896396637	https://www.genecards.org/cgi-bin/carddisp.pl?gene=NCBP2
RNF7	Ring Finger Protein 7	Protein Coding	Q9UBF6	51	GC03P141738	0.358060896396637	https://www.genecards.org/cgi-bin/carddisp.pl?gene=RNF7
SAA1	Serum Amyloid A1	Protein Coding	P0DJI8	51	GC11P023547	0.358060896396637	https://www.genecards.org/cgi-bin/carddisp.pl?gene=SAA1
TNFSF12	TNF Superfamily Member 12	Protein Coding	O43508	51	GC17P164144	0.358060896396637	https://www.genecards.org/cgi-bin/carddisp.pl?gene=TNFSF12
TRIM8	Tripartite Motif Containing 8	Protein Coding	Q9BZR9	51	GC10P128984	0.358060896396637	https://www.genecards.org/cgi-bin/carddisp.pl?gene=TRIM8
CCL26	C-C Motif Chemokine Ligand 26	Protein Coding	Q9Y258	50	GC07M075769	0.358060896396637	https://www.genecards.org/cgi-bin/carddisp.pl?gene=CCL26
IBTK	Inhibitor Of Bruton Tyrosine Kinase	Protein Coding	Q9P2D0	50	GC06M082169	0.358060896396637	https://www.genecards.org/cgi-bin/carddisp.pl?gene=IBTK
IL32	Interleukin 32	Protein Coding	P24001	50	GC16P128088	0.358060896396637	https://www.genecards.org/cgi-bin/carddisp.pl?gene=IL32
MRPL12	Mitochondrial Ribosomal Protein L12	Protein Coding	P52815	50	GC17P166168	0.358060896396637	https://www.genecards.org/cgi-bin/carddisp.pl?gene=MRPL12
NIPA1	NIPA Magnesium Transporter 1	Protein Coding	Q7RTP0	50	GC15P022773	0.358060896396637	https://www.genecards.org/cgi-bin/carddisp.pl?gene=NIPA1
RAB18	RAB18, Member RAS Oncogene Family	Protein Coding	Q9NP72	50	GC10P027504	0.358060896396637	https://www.genecards.org/cgi-bin/carddisp.pl?gene=RAB18
SFTPA2	Surfactant Protein A2	Protein Coding	Q8IWL1	50	GC10M084829	0.358060896396637	https://www.genecards.org/cgi-bin/carddisp.pl?gene=SFTPA2
FAM120A	Family With Sequence Similarity 120 Member A	Protein Coding	Q9NZB2	49	GC09P109665	0.358060896396637	https://www.genecards.org/cgi-bin/carddisp.pl?gene=FAM120A
H1-1	H1.1 Linker Histone, Cluster Member	Protein Coding	Q02539	49	GC06M110950	0.358060896396637	https://www.genecards.org/cgi-bin/carddisp.pl?gene=H1-1
ILF2	Interleukin Enhancer Binding Factor 2	Protein Coding	Q12905	49	GC01M153661	0.358060896396637	https://www.genecards.org/cgi-bin/carddisp.pl?gene=ILF2
MAGOH	Mago Homolog, Exon Junction Complex Subunit	Protein Coding	P61326	49	GC01M053226	0.358060896396637	https://www.genecards.org/cgi-bin/carddisp.pl?gene=MAGOH
MRPS28	Mitochondrial Ribosomal Protein S28	Protein Coding	Q9Y2Q9	49	GC08M079999	0.358060896396637	https://www.genecards.org/cgi-bin/carddisp.pl?gene=MRPS28
NDFIP1	Nedd4 Family Interacting Protein 1	Protein Coding	Q9BT67	49	GC05P142108	0.358060896396637	https://www.genecards.org/cgi-bin/carddisp.pl?gene=NDFIP1
NFKBIZ	NFKB Inhibitor Zeta	Protein Coding	Q9BYH8	49	GC03P101827	0.358060896396637	https://www.genecards.org/cgi-bin/carddisp.pl?gene=NFKBIZ
TAF10	TATA-Box Binding Protein Associated Factor 10	Protein Coding	Q12962	49	GC11M016056	0.358060896396637	https://www.genecards.org/cgi-bin/carddisp.pl?gene=TAF10
TAF8	TATA-Box Binding Protein Associated Factor 8	Protein Coding	Q7Z7C8	49	GC06P042050	0.358060896396637	https://www.genecards.org/cgi-bin/carddisp.pl?gene=TAF8
USP34	Ubiquitin Specific Peptidase 34	Protein Coding	Q70CQ2	49	GC02M061187	0.358060896396637	https://www.genecards.org/cgi-bin/carddisp.pl?gene=USP34
AP1G2	Adaptor Related Protein Complex 1 Subunit Gamma 2	Protein Coding	O75843	48	GC14M023559	0.358060896396637	https://www.genecards.org/cgi-bin/carddisp.pl?gene=AP1G2
HIKESHI	Heat Shock Protein Nuclear Import Factor Hikeshi	Protein Coding	Q53FT3	48	GC11P115740	0.358060896396637	https://www.genecards.org/cgi-bin/carddisp.pl?gene=HIKESHI
MRPL1	Mitochondrial Ribosomal Protein L1	Protein Coding	Q9BYD6	48	GC04P077862	0.358060896396637	https://www.genecards.org/cgi-bin/carddisp.pl?gene=MRPL1
MRPS9	Mitochondrial Ribosomal Protein S9	Protein Coding	P82933	48	GC02P105066	0.358060896396637	https://www.genecards.org/cgi-bin/carddisp.pl?gene=MRPS9
TAF12	TATA-Box Binding Protein Associated Factor 12	Protein Coding	Q16514	48	GC01M037341	0.358060896396637	https://www.genecards.org/cgi-bin/carddisp.pl?gene=TAF12
ZNF331	Zinc Finger Protein 331	Protein Coding	Q9NQX6	48	GC19P162625	0.358060896396637	https://www.genecards.org/cgi-bin/carddisp.pl?gene=ZNF331
CASC3	CASC3 Exon Junction Complex Subunit	Protein Coding	O15234	47	GC17P040140	0.358060896396637	https://www.genecards.org/cgi-bin/carddisp.pl?gene=CASC3
EDEM3	ER Degradation Enhancing Alpha-Mannosidase Like Protein 3	Protein Coding	Q9BZQ6	47	GC01M184690	0.358060896396637	https://www.genecards.org/cgi-bin/carddisp.pl?gene=EDEM3
MRPS18B	Mitochondrial Ribosomal Protein S18B	Protein Coding	Q9Y676	47	GC06P030617	0.358060896396637	https://www.genecards.org/cgi-bin/carddisp.pl?gene=MRPS18B
PSME1	Proteasome Activator Subunit 1	Protein Coding	Q06323	47	GC14P024136	0.358060896396637	https://www.genecards.org/cgi-bin/carddisp.pl?gene=PSME1
RO60	Ro60, Y RNA Binding Protein	Protein Coding	P10155	47	GC01P193059	0.358060896396637	https://www.genecards.org/cgi-bin/carddisp.pl?gene=RO60
SF3B5	Splicing Factor 3b Subunit 5	Protein Coding	Q9BWJ5	47	GC06M144094	0.358060896396637	https://www.genecards.org/cgi-bin/carddisp.pl?gene=SF3B5
TAF5	TATA-Box Binding Protein Associated Factor 5	Protein Coding	Q15542	47	GC10P129046	0.358060896396637	https://www.genecards.org/cgi-bin/carddisp.pl?gene=TAF5
TAF5L	TATA-Box Binding Protein Associated Factor 5 Like	Protein Coding	O75529	47	GC01M229593	0.358060896396637	https://www.genecards.org/cgi-bin/carddisp.pl?gene=TAF5L
YTHDF1	YTH N6-Methyladenosine RNA Binding Protein F1	Protein Coding	Q9BYJ9	47	GC20M063195	0.358060896396637	https://www.genecards.org/cgi-bin/carddisp.pl?gene=YTHDF1
MRPS6	Mitochondrial Ribosomal Protein S6	Protein Coding	P82932	46	GC21P034320	0.358060896396637	https://www.genecards.org/cgi-bin/carddisp.pl?gene=MRPS6
PTCD1	Pentatricopeptide Repeat Domain 1	Protein Coding	O75127	46	GC07M106996	0.358060896396637	https://www.genecards.org/cgi-bin/carddisp.pl?gene=PTCD1
SUPT3H	SPT3 Homolog, SAGA And STAGA Complex Component	Protein Coding	O75486	46	GC06M111841	0.358060896396637	https://www.genecards.org/cgi-bin/carddisp.pl?gene=SUPT3H
TFPT	TCF3 Fusion Partner	Protein Coding	P0C1Z6	46	GC19M054107	0.358060896396637	https://www.genecards.org/cgi-bin/carddisp.pl?gene=TFPT
TMEM94	Transmembrane Protein 94	Protein Coding	Q12767	46	GC17P165981	0.358060896396637	https://www.genecards.org/cgi-bin/carddisp.pl?gene=TMEM94
WDR74	WD Repeat Domain 74	Protein Coding	Q6RFH5	46	GC11M062832	0.358060896396637	https://www.genecards.org/cgi-bin/carddisp.pl?gene=WDR74
H2BC3	H2B Clustered Histone 3	Protein Coding	P33778	45	GC06M110972	0.358060896396637	https://www.genecards.org/cgi-bin/carddisp.pl?gene=H2BC3
RBM3	RNA Binding Motif Protein 3	Protein Coding	P98179	45	GC0XP048574	0.358060896396637	https://www.genecards.org/cgi-bin/carddisp.pl?gene=RBM3
UBR3	Ubiquitin Protein Ligase E3 Component N-Recognin 3	Protein Coding	Q6ZT12	45	GC02P169827	0.358060896396637	https://www.genecards.org/cgi-bin/carddisp.pl?gene=UBR3
ALG10	ALG10 Alpha-1,2-Glucosyltransferase	Protein Coding	Q5BKT4	44	GC12P034022	0.358060896396637	https://www.genecards.org/cgi-bin/carddisp.pl?gene=ALG10
H2AC4	H2A Clustered Histone 4	Protein Coding	P04908	44	GC06M110978	0.358060896396637	https://www.genecards.org/cgi-bin/carddisp.pl?gene=H2AC4
KIF27	Kinesin Family Member 27	Protein Coding	Q86VH2	44	GC09M126258	0.358060896396637	https://www.genecards.org/cgi-bin/carddisp.pl?gene=KIF27
MRPL52	Mitochondrial Ribosomal Protein L52	Protein Coding	Q86TS9	44	GC14P022829	0.358060896396637	https://www.genecards.org/cgi-bin/carddisp.pl?gene=MRPL52
TADA3	Transcriptional Adaptor 3	Protein Coding	O75528	44	GC03M009779	0.358060896396637	https://www.genecards.org/cgi-bin/carddisp.pl?gene=TADA3
TXNDC12	Thioredoxin Domain Containing 12	Protein Coding	O95881	44	GC01M052020	0.358060896396637	https://www.genecards.org/cgi-bin/carddisp.pl?gene=TXNDC12
ASB11	Ankyrin Repeat And SOCS Box Containing 11	Protein Coding	Q8WXH4	43	GC0XM016707	0.358060896396637	https://www.genecards.org/cgi-bin/carddisp.pl?gene=ASB11
ATXN7L3	Ataxin 7 Like 3	Protein Coding	Q14CW9	43	GC17M044191	0.358060896396637	https://www.genecards.org/cgi-bin/carddisp.pl?gene=ATXN7L3
C18orf32	Chromosome 18 Open Reading Frame 32	Protein Coding	Q8TCD1	43	GC18M049477	0.358060896396637	https://www.genecards.org/cgi-bin/carddisp.pl?gene=C18orf32
ENY2	ENY2 Transcription And Export Complex 2 Subunit	Protein Coding	Q9NPA8	43	GC08P109334	0.358060896396637	https://www.genecards.org/cgi-bin/carddisp.pl?gene=ENY2
OCIAD2	OCIA Domain Containing 2	Protein Coding	Q56VL3	43	GC04M048891	0.358060896396637	https://www.genecards.org/cgi-bin/carddisp.pl?gene=OCIAD2
RALYL	RALY RNA Binding Protein Like	Protein Coding	Q86SE5	43	GC08P084182	0.358060896396637	https://www.genecards.org/cgi-bin/carddisp.pl?gene=RALYL
RPL39	Ribosomal Protein L39	Protein Coding	P62891	43	GC0XM119786	0.358060896396637	https://www.genecards.org/cgi-bin/carddisp.pl?gene=RPL39
TADA2B	Transcriptional Adaptor 2B	Protein Coding	Q86TJ2	43	GC04P031911	0.358060896396637	https://www.genecards.org/cgi-bin/carddisp.pl?gene=TADA2B
BATF2	Basic Leucine Zipper ATF-Like Transcription Factor 2	Protein Coding	Q8N1L9	42	GC11M064987	0.358060896396637	https://www.genecards.org/cgi-bin/carddisp.pl?gene=BATF2
KLF16	KLF Transcription Factor 16	Protein Coding	Q9BXK1	42	GC19M001852	0.358060896396637	https://www.genecards.org/cgi-bin/carddisp.pl?gene=KLF16
KLHDC10	Kelch Domain Containing 10	Protein Coding	Q6PID8	42	GC07P130070	0.358060896396637	https://www.genecards.org/cgi-bin/carddisp.pl?gene=KLHDC10
MRPS31	Mitochondrial Ribosomal Protein S31	Protein Coding	Q92665	42	GC13M040729	0.358060896396637	https://www.genecards.org/cgi-bin/carddisp.pl?gene=MRPS31
RHBDL3	Rhomboid Like 3	Protein Coding	P58872	42	GC17P164809	0.358060896396637	https://www.genecards.org/cgi-bin/carddisp.pl?gene=RHBDL3
SUPT7L	SPT7 Like, STAGA Complex Subunit Gamma	Protein Coding	O94864	42	GC02M029323	0.358060896396637	https://www.genecards.org/cgi-bin/carddisp.pl?gene=SUPT7L
TAF6L	TATA-Box Binding Protein Associated Factor 6 Like	Protein Coding	Q9Y6J9	42	GC11P062771	0.358060896396637	https://www.genecards.org/cgi-bin/carddisp.pl?gene=TAF6L
CDV3	CDV3 Homolog	Protein Coding	Q9UKY7	41	GC03P133573	0.358060896396637	https://www.genecards.org/cgi-bin/carddisp.pl?gene=CDV3
WBP1	WW Domain Binding Protein 1	Protein Coding	Q96G27	41	GC02P074458	0.358060896396637	https://www.genecards.org/cgi-bin/carddisp.pl?gene=WBP1
ZCCHC3	Zinc Finger CCHC-Type Containing 3	Protein Coding	Q9NUD5	41	GC20P000297	0.358060896396637	https://www.genecards.org/cgi-bin/carddisp.pl?gene=ZCCHC3
FLYWCH2	FLYWCH Family Member 2	Protein Coding	Q96CP2	40	GC16P128080	0.358060896396637	https://www.genecards.org/cgi-bin/carddisp.pl?gene=FLYWCH2
DDX60L	DExD/H-Box 60 Like	Protein Coding	Q5H9U9	39	GC04M168356	0.358060896396637	https://www.genecards.org/cgi-bin/carddisp.pl?gene=DDX60L
TADA1	Transcriptional Adaptor 1	Protein Coding	Q96BN2	39	GC01M168930	0.358060896396637	https://www.genecards.org/cgi-bin/carddisp.pl?gene=TADA1
CDKN2AIPNL	CDKN2A Interacting Protein N-Terminal Like	Protein Coding	Q96HQ2	38	GC05M134402	0.358060896396637	https://www.genecards.org/cgi-bin/carddisp.pl?gene=CDKN2AIPNL
C3orf70	Chromosome 3 Open Reading Frame 70	Protein Coding	A6NLC5	36	GC03M185078	0.358060896396637	https://www.genecards.org/cgi-bin/carddisp.pl?gene=C3orf70
MIR30B	MicroRNA 30b	RNA Gene		30	GC08M134800	0.358060896396637	https://www.genecards.org/cgi-bin/carddisp.pl?gene=MIR30B
TRA	T Cell Receptor Alpha Locus	Protein Coding	P0DSE1	30	GC14P021621	0.358060896396637	https://www.genecards.org/cgi-bin/carddisp.pl?gene=TRA
TRB	T Cell Receptor Beta Locus	Protein Coding	P0DSE2	29	GC07P170129	0.358060896396637	https://www.genecards.org/cgi-bin/carddisp.pl?gene=TRB
LINC-PINT	Long Intergenic Non-Protein Coding RNA, P53 Induced Transcript	RNA Gene	A0A455ZAR2	28	GC07M130795	0.358060896396637	https://www.genecards.org/cgi-bin/carddisp.pl?gene=LINC-PINT
MEG8	Maternally Expressed 8, Small Nucleolar RNA Host Gene	RNA Gene		27	GC14P122486	0.358060896396637	https://www.genecards.org/cgi-bin/carddisp.pl?gene=MEG8
MIR301A	MicroRNA 301a	RNA Gene		27	GC17M059151	0.358060896396637	https://www.genecards.org/cgi-bin/carddisp.pl?gene=MIR301A
LINC01619	Long Intergenic Non-Protein Coding RNA 1619	RNA Gene	G3V211	24	GC12M091993	0.358060896396637	https://www.genecards.org/cgi-bin/carddisp.pl?gene=LINC01619
MIR616	MicroRNA 616	RNA Gene		23	GC12M057519	0.358060896396637	https://www.genecards.org/cgi-bin/carddisp.pl?gene=MIR616
BACE1-AS	BACE1 Antisense RNA	RNA Gene		21	GC11P127919	0.358060896396637	https://www.genecards.org/cgi-bin/carddisp.pl?gene=BACE1-AS
LINC01121	Long Intergenic Non-Protein Coding RNA 1121	RNA Gene		20	GC02M045056	0.358060896396637	https://www.genecards.org/cgi-bin/carddisp.pl?gene=LINC01121
MFF-DT	MFF Divergent Transcript	RNA Gene		18	GC02M227223	0.358060896396637	https://www.genecards.org/cgi-bin/carddisp.pl?gene=MFF-DT
TRU-TCA1-1	TRNA-SeC (Anticodon TCA) 1-1	RNA Gene		18	GC19M045478	0.358060896396637	https://www.genecards.org/cgi-bin/carddisp.pl?gene=TRU-TCA1-1
HFE-AS1	HFE Antisense RNA 1	RNA Gene		14	GC06M110975	0.358060896396637	https://www.genecards.org/cgi-bin/carddisp.pl?gene=HFE-AS1
MIR1291	MicroRNA 1291	RNA Gene		13	GC12M048654	0.358060896396637	https://www.genecards.org/cgi-bin/carddisp.pl?gene=MIR1291
XBP1P1	X-Box Binding Protein 1 Pseudogene 1	Pseudogene		13	GC05P112885	0.358060896396637	https://www.genecards.org/cgi-bin/carddisp.pl?gene=XBP1P1
LOC125446261	Sharpr-MPRA Regulatory Region 9327	Functional Element		7	GC22P098295	0.358060896396637	https://www.genecards.org/cgi-bin/carddisp.pl?gene=LOC125446261
LOC130060903	ATAC-STARR-Seq Lymphoblastoid Silent Region 8533	Functional Element		7	GC17P172307	0.358060896396637	https://www.genecards.org/cgi-bin/carddisp.pl?gene=LOC130060903
LOC126807536	CDK7 Strongly-Dependent Group 2 Enhancer GRCh37_chr5:143543592-143544791	Functional Element		6	GC05P161716	0.358060896396637	https://www.genecards.org/cgi-bin/carddisp.pl?gene=LOC126807536
NTRK2	Neurotrophic Receptor Tyrosine Kinase 2	Protein Coding	Q16620	66	GC09P084668	0.310089826583862	https://www.genecards.org/cgi-bin/carddisp.pl?gene=NTRK2
PIK3CD	Phosphatidylinositol-4,5-Bisphosphate 3-Kinase Catalytic Subunit Delta	Protein Coding	O00329	66	GC01P083234	0.310089826583862	https://www.genecards.org/cgi-bin/carddisp.pl?gene=PIK3CD
CTSD	Cathepsin D	Protein Coding	P07339	65	GC11M001752	0.310089826583862	https://www.genecards.org/cgi-bin/carddisp.pl?gene=CTSD
IDH2	Isocitrate Dehydrogenase (NADP(+)) 2	Protein Coding	P48735	65	GC15M090083	0.310089826583862	https://www.genecards.org/cgi-bin/carddisp.pl?gene=IDH2
PRKACA	Protein Kinase CAMP-Activated Catalytic Subunit Alpha	Protein Coding	P17612	65	GC19M112024	0.310089826583862	https://www.genecards.org/cgi-bin/carddisp.pl?gene=PRKACA
DBH	Dopamine Beta-Hydroxylase	Protein Coding	P09172	64	GC09P133636	0.310089826583862	https://www.genecards.org/cgi-bin/carddisp.pl?gene=DBH
ACAT1	Acetyl-CoA Acetyltransferase 1	Protein Coding	P24752	63	GC11P116279	0.310089826583862	https://www.genecards.org/cgi-bin/carddisp.pl?gene=ACAT1
CAMK2B	Calcium/Calmodulin Dependent Protein Kinase II Beta	Protein Coding	Q13554	63	GC07M045797	0.310089826583862	https://www.genecards.org/cgi-bin/carddisp.pl?gene=CAMK2B
COMT	Catechol-O-Methyltransferase	Protein Coding	P21964	63	GC22P019941	0.310089826583862	https://www.genecards.org/cgi-bin/carddisp.pl?gene=COMT
EPAS1	Endothelial PAS Domain Protein 1	Protein Coding	Q99814	63	GC02P046293	0.310089826583862	https://www.genecards.org/cgi-bin/carddisp.pl?gene=EPAS1
TLR3	Toll Like Receptor 3	Protein Coding	O15455	63	GC04P186059	0.310089826583862	https://www.genecards.org/cgi-bin/carddisp.pl?gene=TLR3
COL2A1	Collagen Type II Alpha 1 Chain	Protein Coding	P02458	62	GC12M047972	0.310089826583862	https://www.genecards.org/cgi-bin/carddisp.pl?gene=COL2A1
DSP	Desmoplakin	Protein Coding	P15924	62	GC06P007541	0.310089826583862	https://www.genecards.org/cgi-bin/carddisp.pl?gene=DSP
LEPR	Leptin Receptor	Protein Coding	P48357	62	GC01P086456	0.310089826583862	https://www.genecards.org/cgi-bin/carddisp.pl?gene=LEPR
MME	Membrane Metalloendopeptidase	Protein Coding	P08473	62	GC03P155024	0.310089826583862	https://www.genecards.org/cgi-bin/carddisp.pl?gene=MME
MTAP	Methylthioadenosine Phosphorylase	Protein Coding	Q13126	62	GC09P022155	0.310089826583862	https://www.genecards.org/cgi-bin/carddisp.pl?gene=MTAP
NR5A1	Nuclear Receptor Subfamily 5 Group A Member 1	Protein Coding	Q13285	62	GC09M124481	0.310089826583862	https://www.genecards.org/cgi-bin/carddisp.pl?gene=NR5A1
PCSK1	Proprotein Convertase Subtilisin/Kexin Type 1	Protein Coding	P29120	62	GC05M096391	0.310089826583862	https://www.genecards.org/cgi-bin/carddisp.pl?gene=PCSK1
PGR	Progesterone Receptor	Protein Coding	P06401	62	GC11M143573	0.310089826583862	https://www.genecards.org/cgi-bin/carddisp.pl?gene=PGR
CSNK2B	Casein Kinase 2 Beta	Protein Coding	P67870	61	GC06P190711	0.310089826583862	https://www.genecards.org/cgi-bin/carddisp.pl?gene=CSNK2B
IDE	Insulin Degrading Enzyme	Protein Coding	P14735	61	GC10M092451	0.310089826583862	https://www.genecards.org/cgi-bin/carddisp.pl?gene=IDE
IMPDH2	Inosine Monophosphate Dehydrogenase 2	Protein Coding	P12268	61	GC03M055011	0.310089826583862	https://www.genecards.org/cgi-bin/carddisp.pl?gene=IMPDH2
LIPA	Lipase A, Lysosomal Acid Type	Protein Coding	P38571	61	GC10M089213	0.310089826583862	https://www.genecards.org/cgi-bin/carddisp.pl?gene=LIPA
NQO1	NAD(P)H Quinone Dehydrogenase 1	Protein Coding	P15559	61	GC16M069706	0.310089826583862	https://www.genecards.org/cgi-bin/carddisp.pl?gene=NQO1
TRPV4	Transient Receptor Potential Cation Channel Subfamily V Member 4	Protein Coding	Q9HBA0	61	GC12M109783	0.310089826583862	https://www.genecards.org/cgi-bin/carddisp.pl?gene=TRPV4
UBA1	Ubiquitin Like Modifier Activating Enzyme 1	Protein Coding	P22314	61	GC0XP047190	0.310089826583862	https://www.genecards.org/cgi-bin/carddisp.pl?gene=UBA1
YAP1	Yes1 Associated Transcriptional Regulator	Protein Coding	P46937	61	GC11P102110	0.310089826583862	https://www.genecards.org/cgi-bin/carddisp.pl?gene=YAP1
AHCY	Adenosylhomocysteinase	Protein Coding	P23526	60	GC20M037719	0.310089826583862	https://www.genecards.org/cgi-bin/carddisp.pl?gene=AHCY
CARM1	Coactivator Associated Arginine Methyltransferase 1	Protein Coding	Q86X55	60	GC19P010871	0.310089826583862	https://www.genecards.org/cgi-bin/carddisp.pl?gene=CARM1
GJB1	Gap Junction Protein Beta 1	Protein Coding	P08034	60	GC0XP071212	0.310089826583862	https://www.genecards.org/cgi-bin/carddisp.pl?gene=GJB1
HEXB	Hexosaminidase Subunit Beta	Protein Coding	P07686	60	GC05P074640	0.310089826583862	https://www.genecards.org/cgi-bin/carddisp.pl?gene=HEXB
L1CAM	L1 Cell Adhesion Molecule	Protein Coding	P32004	60	GC0XM153864	0.310089826583862	https://www.genecards.org/cgi-bin/carddisp.pl?gene=L1CAM
MAPK13	Mitogen-Activated Protein Kinase 13	Protein Coding	O15264	60	GC06P190828	0.310089826583862	https://www.genecards.org/cgi-bin/carddisp.pl?gene=MAPK13
MCM4	Minichromosome Maintenance Complex Component 4	Protein Coding	P33991	60	GC08P047975	0.310089826583862	https://www.genecards.org/cgi-bin/carddisp.pl?gene=MCM4
MYH9	Myosin Heavy Chain 9	Protein Coding	P35579	60	GC22M036281	0.310089826583862	https://www.genecards.org/cgi-bin/carddisp.pl?gene=MYH9
PDHA1	Pyruvate Dehydrogenase E1 Subunit Alpha 1	Protein Coding	P08559	60	GC0XP019343	0.310089826583862	https://www.genecards.org/cgi-bin/carddisp.pl?gene=PDHA1
PDK1	Pyruvate Dehydrogenase Kinase 1	Protein Coding	Q15118	60	GC02P172555	0.310089826583862	https://www.genecards.org/cgi-bin/carddisp.pl?gene=PDK1
PGM1	Phosphoglucomutase 1	Protein Coding	P36871	60	GC01P063593	0.310089826583862	https://www.genecards.org/cgi-bin/carddisp.pl?gene=PGM1
RAB27A	RAB27A, Member RAS Oncogene Family	Protein Coding	P51159	60	GC15M055202	0.310089826583862	https://www.genecards.org/cgi-bin/carddisp.pl?gene=RAB27A
SMC3	Structural Maintenance Of Chromosomes 3	Protein Coding	Q9UQE7	60	GC10P110567	0.310089826583862	https://www.genecards.org/cgi-bin/carddisp.pl?gene=SMC3
TCF7L2	Transcription Factor 7 Like 2	Protein Coding	Q9NQB0	60	GC10P112950	0.310089826583862	https://www.genecards.org/cgi-bin/carddisp.pl?gene=TCF7L2
TPM1	Tropomyosin 1	Protein Coding	P09493	60	GC15P209649	0.310089826583862	https://www.genecards.org/cgi-bin/carddisp.pl?gene=TPM1
ACADM	Acyl-CoA Dehydrogenase Medium Chain	Protein Coding	P11310	59	GC01P075724	0.310089826583862	https://www.genecards.org/cgi-bin/carddisp.pl?gene=ACADM
ACO2	Aconitase 2	Protein Coding	Q99798	59	GC22P097511	0.310089826583862	https://www.genecards.org/cgi-bin/carddisp.pl?gene=ACO2
CD59	CD59 Molecule (CD59 Blood Group)	Protein Coding	P13987	59	GC11M033742	0.310089826583862	https://www.genecards.org/cgi-bin/carddisp.pl?gene=CD59
CDK5R1	Cyclin Dependent Kinase 5 Regulatory Subunit 1	Protein Coding	Q15078	59	GC17P032486	0.310089826583862	https://www.genecards.org/cgi-bin/carddisp.pl?gene=CDK5R1
CSF3R	Colony Stimulating Factor 3 Receptor	Protein Coding	Q99062	59	GC01M036466	0.310089826583862	https://www.genecards.org/cgi-bin/carddisp.pl?gene=CSF3R
EGLN3	Egl-9 Family Hypoxia Inducible Factor 3	Protein Coding	Q9H6Z9	59	GC14M033924	0.310089826583862	https://www.genecards.org/cgi-bin/carddisp.pl?gene=EGLN3
FH	Fumarate Hydratase	Protein Coding	P07954	59	GC01M241499	0.310089826583862	https://www.genecards.org/cgi-bin/carddisp.pl?gene=FH
IMPA1	Inositol Monophosphatase 1	Protein Coding	P29218	59	GC08M081656	0.310089826583862	https://www.genecards.org/cgi-bin/carddisp.pl?gene=IMPA1
IRF1	Interferon Regulatory Factor 1	Protein Coding	P10914	59	GC05M132440	0.310089826583862	https://www.genecards.org/cgi-bin/carddisp.pl?gene=IRF1
MYH10	Myosin Heavy Chain 10	Protein Coding	P35580	59	GC17M008474	0.310089826583862	https://www.genecards.org/cgi-bin/carddisp.pl?gene=MYH10
OGT	O-Linked N-Acetylglucosamine (GlcNAc) Transferase	Protein Coding	O15294	59	GC0XP072120	0.310089826583862	https://www.genecards.org/cgi-bin/carddisp.pl?gene=OGT
PDHB	Pyruvate Dehydrogenase E1 Subunit Beta	Protein Coding	P11177	59	GC03M058512	0.310089826583862	https://www.genecards.org/cgi-bin/carddisp.pl?gene=PDHB
PRDX6	Peroxiredoxin 6	Protein Coding	P30041	59	GC01P173477	0.310089826583862	https://www.genecards.org/cgi-bin/carddisp.pl?gene=PRDX6
SHMT2	Serine Hydroxymethyltransferase 2	Protein Coding	P34897	59	GC12P057229	0.310089826583862	https://www.genecards.org/cgi-bin/carddisp.pl?gene=SHMT2
SUCLA2	Succinate-CoA Ligase ADP-Forming Subunit Beta	Protein Coding	Q9P2R7	59	GC13M047745	0.310089826583862	https://www.genecards.org/cgi-bin/carddisp.pl?gene=SUCLA2
TCF4	Transcription Factor 4	Protein Coding	P15884	59	GC18M055222	0.310089826583862	https://www.genecards.org/cgi-bin/carddisp.pl?gene=TCF4
AGXT	Alanine--Glyoxylate Aminotransferase	Protein Coding	P21549	58	GC02P240868	0.310089826583862	https://www.genecards.org/cgi-bin/carddisp.pl?gene=AGXT
ATIC	5-Aminoimidazole-4-Carboxamide Ribonucleotide Formyltransferase/IMP Cyclohydrolase	Protein Coding	P31939	58	GC02P215311	0.310089826583862	https://www.genecards.org/cgi-bin/carddisp.pl?gene=ATIC
CS	Citrate Synthase	Protein Coding	O75390	58	GC12M056271	0.310089826583862	https://www.genecards.org/cgi-bin/carddisp.pl?gene=CS
CXCR3	C-X-C Motif Chemokine Receptor 3	Protein Coding	P49682	58	GC0XM071615	0.310089826583862	https://www.genecards.org/cgi-bin/carddisp.pl?gene=CXCR3
DPYSL2	Dihydropyrimidinase Like 2	Protein Coding	Q16555	58	GC08P026514	0.310089826583862	https://www.genecards.org/cgi-bin/carddisp.pl?gene=DPYSL2
ETFA	Electron Transfer Flavoprotein Subunit Alpha	Protein Coding	P13804	58	GC15M166373	0.310089826583862	https://www.genecards.org/cgi-bin/carddisp.pl?gene=ETFA
F3	Coagulation Factor III, Tissue Factor	Protein Coding	P13726	58	GC01M095087	0.310089826583862	https://www.genecards.org/cgi-bin/carddisp.pl?gene=F3
FTL	Ferritin Light Chain	Protein Coding	P02792	58	GC19P048965	0.310089826583862	https://www.genecards.org/cgi-bin/carddisp.pl?gene=FTL
HNRNPK	Heterogeneous Nuclear Ribonucleoprotein K	Protein Coding	P61978	58	GC09M126260	0.310089826583862	https://www.genecards.org/cgi-bin/carddisp.pl?gene=HNRNPK
IRF3	Interferon Regulatory Factor 3	Protein Coding	Q14653	58	GC19M049659	0.310089826583862	https://www.genecards.org/cgi-bin/carddisp.pl?gene=IRF3
KRT5	Keratin 5	Protein Coding	P13647	58	GC12M052514	0.310089826583862	https://www.genecards.org/cgi-bin/carddisp.pl?gene=KRT5
PRKCSH	PRKCSH Beta Subunit Of Glucosidase II	Protein Coding	P14314	58	GC19P011435	0.310089826583862	https://www.genecards.org/cgi-bin/carddisp.pl?gene=PRKCSH
SERPINI1	Serpin Family I Member 1	Protein Coding	Q99574	58	GC03P167735	0.310089826583862	https://www.genecards.org/cgi-bin/carddisp.pl?gene=SERPINI1
AHSG	Alpha 2-HS Glycoprotein	Protein Coding	P02765	57	GC03P186742	0.310089826583862	https://www.genecards.org/cgi-bin/carddisp.pl?gene=AHSG
ASL	Argininosuccinate Lyase	Protein Coding	P04424	57	GC07P066075	0.310089826583862	https://www.genecards.org/cgi-bin/carddisp.pl?gene=ASL
CD63	CD63 Molecule	Protein Coding	P08962	57	GC12M060634	0.310089826583862	https://www.genecards.org/cgi-bin/carddisp.pl?gene=CD63
CLPP	Caseinolytic Mitochondrial Matrix Peptidase Proteolytic Subunit	Protein Coding	Q16740	57	GC19P161153	0.310089826583862	https://www.genecards.org/cgi-bin/carddisp.pl?gene=CLPP
CPOX	Coproporphyrinogen Oxidase	Protein Coding	P36551	57	GC03M098576	0.310089826583862	https://www.genecards.org/cgi-bin/carddisp.pl?gene=CPOX
CYB5R3	Cytochrome B5 Reductase 3	Protein Coding	P00387	57	GC22M088458	0.310089826583862	https://www.genecards.org/cgi-bin/carddisp.pl?gene=CYB5R3
DPAGT1	Dolichyl-Phosphate N-Acetylglucosaminephosphotransferase 1	Protein Coding	Q9H3H5	57	GC11M143857	0.310089826583862	https://www.genecards.org/cgi-bin/carddisp.pl?gene=DPAGT1
FCN3	Ficolin 3	Protein Coding	O75636	57	GC01M037077	0.310089826583862	https://www.genecards.org/cgi-bin/carddisp.pl?gene=FCN3
HPSE	Heparanase	Protein Coding	Q9Y251	57	GC04M083292	0.310089826583862	https://www.genecards.org/cgi-bin/carddisp.pl?gene=HPSE
ITPR2	Inositol 1,4,5-Trisphosphate Receptor Type 2	Protein Coding	Q14571	57	GC12M037239	0.310089826583862	https://www.genecards.org/cgi-bin/carddisp.pl?gene=ITPR2
KPNB1	Karyopherin Subunit Beta 1	Protein Coding	Q14974	57	GC17P047649	0.310089826583862	https://www.genecards.org/cgi-bin/carddisp.pl?gene=KPNB1
LAMP1	Lysosomal Associated Membrane Protein 1	Protein Coding	P11279	57	GC13P113297	0.310089826583862	https://www.genecards.org/cgi-bin/carddisp.pl?gene=LAMP1
NOX1	NADPH Oxidase 1	Protein Coding	Q9Y5S8	57	GC0XM100843	0.310089826583862	https://www.genecards.org/cgi-bin/carddisp.pl?gene=NOX1
NSDHL	NAD(P) Dependent 3-Beta-Hydroxysteroid Dehydrogenase NSDHL	Protein Coding	Q15738	57	GC0XP152830	0.310089826583862	https://www.genecards.org/cgi-bin/carddisp.pl?gene=NSDHL
NUMA1	Nuclear Mitotic Apparatus Protein 1	Protein Coding	Q14980	57	GC11M072002	0.310089826583862	https://www.genecards.org/cgi-bin/carddisp.pl?gene=NUMA1
PNPLA2	Patatin Like Domain 2, Triacylglycerol Lipase	Protein Coding	Q96AD5	57	GC11P022712	0.310089826583862	https://www.genecards.org/cgi-bin/carddisp.pl?gene=PNPLA2
PON3	Paraoxonase 3	Protein Coding	Q15166	57	GC07M095359	0.310089826583862	https://www.genecards.org/cgi-bin/carddisp.pl?gene=PON3
PRDX5	Peroxiredoxin 5	Protein Coding	P30044	57	GC11P114946	0.310089826583862	https://www.genecards.org/cgi-bin/carddisp.pl?gene=PRDX5
SLC27A2	Solute Carrier Family 27 Member 2	Protein Coding	O14975	57	GC15P050182	0.310089826583862	https://www.genecards.org/cgi-bin/carddisp.pl?gene=SLC27A2
TREM2	Triggering Receptor Expressed On Myeloid Cells 2	Protein Coding	Q9NZC2	57	GC06M111757	0.310089826583862	https://www.genecards.org/cgi-bin/carddisp.pl?gene=TREM2
AZGP1	Alpha-2-Glycoprotein 1, Zinc-Binding	Protein Coding	P25311	56	GC07M107028	0.310089826583862	https://www.genecards.org/cgi-bin/carddisp.pl?gene=AZGP1
CCL7	C-C Motif Chemokine Ligand 7	Protein Coding	P80098	56	GC17P034270	0.310089826583862	https://www.genecards.org/cgi-bin/carddisp.pl?gene=CCL7
CHRNA7	Cholinergic Receptor Nicotinic Alpha 7 Subunit	Protein Coding	P36544	56	GC15P031923	0.310089826583862	https://www.genecards.org/cgi-bin/carddisp.pl?gene=CHRNA7
DNAJC6	DnaJ Heat Shock Protein Family (Hsp40) Member C6	Protein Coding	O75061	56	GC01P065248	0.310089826583862	https://www.genecards.org/cgi-bin/carddisp.pl?gene=DNAJC6
DSG2	Desmoglein 2	Protein Coding	Q14126	56	GC18P031498	0.310089826583862	https://www.genecards.org/cgi-bin/carddisp.pl?gene=DSG2
EBP	EBP Cholestenol Delta-Isomerase	Protein Coding	Q15125	56	GC0XP048521	0.310089826583862	https://www.genecards.org/cgi-bin/carddisp.pl?gene=EBP
EIF4A3	Eukaryotic Translation Initiation Factor 4A3	Protein Coding	P38919	56	GC17M101947	0.310089826583862	https://www.genecards.org/cgi-bin/carddisp.pl?gene=EIF4A3
ENDOG	Endonuclease G	Protein Coding	Q14249	56	GC09P128818	0.310089826583862	https://www.genecards.org/cgi-bin/carddisp.pl?gene=ENDOG
FARSB	Phenylalanyl-TRNA Synthetase Subunit Beta	Protein Coding	Q9NSD9	56	GC02M222570	0.310089826583862	https://www.genecards.org/cgi-bin/carddisp.pl?gene=FARSB
FOSL2	FOS Like 2, AP-1 Transcription Factor Subunit	Protein Coding	P15408	56	GC02P028392	0.310089826583862	https://www.genecards.org/cgi-bin/carddisp.pl?gene=FOSL2
G6PC1	Glucose-6-Phosphatase Catalytic Subunit 1	Protein Coding	P35575	56	GC17P166632	0.310089826583862	https://www.genecards.org/cgi-bin/carddisp.pl?gene=G6PC1
H2AX	H2A.X Variant Histone	Protein Coding	P16104	56	GC11M143854	0.310089826583862	https://www.genecards.org/cgi-bin/carddisp.pl?gene=H2AX
LAP3	Leucine Aminopeptidase 3	Protein Coding	P28838	56	GC04P032213	0.310089826583862	https://www.genecards.org/cgi-bin/carddisp.pl?gene=LAP3
LTA4H	Leukotriene A4 Hydrolase	Protein Coding	P09960	56	GC12M096000	0.310089826583862	https://www.genecards.org/cgi-bin/carddisp.pl?gene=LTA4H
MYO6	Myosin VI	Protein Coding	Q9UM54	56	GC06P075749	0.310089826583862	https://www.genecards.org/cgi-bin/carddisp.pl?gene=MYO6
PCSK7	Proprotein Convertase Subtilisin/Kexin Type 7	Protein Coding	Q16549	56	GC11M143792	0.310089826583862	https://www.genecards.org/cgi-bin/carddisp.pl?gene=PCSK7
PPAT	Phosphoribosyl Pyrophosphate Amidotransferase	Protein Coding	Q06203	56	GC04M056393	0.310089826583862	https://www.genecards.org/cgi-bin/carddisp.pl?gene=PPAT
PSMB10	Proteasome 20S Subunit Beta 10	Protein Coding	P40306	56	GC16M075338	0.310089826583862	https://www.genecards.org/cgi-bin/carddisp.pl?gene=PSMB10
PSMC1	Proteasome 26S Subunit, ATPase 1	Protein Coding	P62191	56	GC14P090256	0.310089826583862	https://www.genecards.org/cgi-bin/carddisp.pl?gene=PSMC1
RAN	RAN, Member RAS Oncogene Family	Protein Coding	P62826	56	GC12P140522	0.310089826583862	https://www.genecards.org/cgi-bin/carddisp.pl?gene=RAN
SLC26A4	Solute Carrier Family 26 Member 4	Protein Coding	O43511	56	GC07P107660	0.310089826583862	https://www.genecards.org/cgi-bin/carddisp.pl?gene=SLC26A4
SLC3A2	Solute Carrier Family 3 Member 2	Protein Coding	P08195	56	GC11P062856	0.310089826583862	https://www.genecards.org/cgi-bin/carddisp.pl?gene=SLC3A2
STT3B	STT3 Oligosaccharyltransferase Complex Catalytic Subunit B	Protein Coding	Q8TCJ2	56	GC03P031532	0.310089826583862	https://www.genecards.org/cgi-bin/carddisp.pl?gene=STT3B
[truncated: 905 more rows]
