# Supplementary material for: Identification of biomarkers associated with endoplasmic reticulum stress-related cell death in osteoporosis based on bulk and single-cell transcriptomic analyses and experimental validation
Source: Research Square preprint supplement (doi:10.21203/rs.3.rs-8454279/v1), 2026-01-12
Supplement: Supplementary file 4 [file 2a87a51a0aaeaadc3a83b9c0.xlsx]

## Sheet: 04_svm_gene
Supplementary Table 7
genes
APPL1
BRSK2
CAMKK2
CCND1
CP
CTSD
DAP3
DAPK3
EGFR
FOXO3
FXN
GLA
HMOX1
HSPB1
PAFAH1B2
PHLDA3
PTEN
RAC1
RIPK2
S100A8
S100A9
SEC22B
SGPL1
SLC25A5
TP63
TRAP1
UBQLN2
