# Supplementary material for: Identification of biomarkers associated with endoplasmic reticulum stress-related cell death in osteoporosis based on bulk and single-cell transcriptomic analyses and experimental validation
Source: Research Square preprint supplement (doi:10.21203/rs.3.rs-8454279/v1), 2026-01-12
Supplement: Supplementary file 5 [file 32a87ad40f38decc70f94e46.xlsx]

## Sheet: Sheet 1
Supplementary Table 4
ID	Description	GeneRatio	BgRatio	pvalue	p.adjust	qvalue	geneID	Count	ONTOLOGY
GO:0010506	regulation of autophagy	10/28	348/18614	4.46392e-11	7.86989e-08	4.44512e-08	FOXO3/SEC22B/UBQLN2/RIPK2/CAMKK2/PAFAH1B2/HMOX1/HSPB1/DAPK3/SLC25A5	10	BP
GO:2001233	regulation of apoptotic signaling pathway	10/28	381/18614	1.08474e-10	9.56194e-08	5.40084e-08	PTEN/S100A8/S100A9/HMOX1/HSPB1/TP63/FXN/SLC25A5/CTNNB1/TRAP1	10	BP
GO:0034599	cellular response to oxidative stress	8/28	290/18614	7.47555e-09	4.39313e-06	2.48136e-06	FOXO3/EGFR/CAMKK2/HMOX1/HSPB1/FXN/CTNNB1/TRAP1	8	BP
GO:0097193	intrinsic apoptotic signaling pathway	8/28	301/18614	9.99852e-09	4.40685e-06	2.4891e-06	BRSK2/S100A8/S100A9/HMOX1/HSPB1/TP63/PHLDA3/TRAP1	8	BP
GO:0062197	cellular response to chemical stress	8/28	349/18614	3.15859e-08	1.11372e-05	6.29059e-06	FOXO3/EGFR/CAMKK2/HMOX1/HSPB1/FXN/CTNNB1/TRAP1	8	BP
GO:0010508	positive regulation of autophagy	6/28	146/18614	6.86315e-08	2.01662e-05	1.13904e-05	FOXO3/RIPK2/CAMKK2/PAFAH1B2/HMOX1/SLC25A5	6	BP
GO:0016241	regulation of macroautophagy	6/28	159/18614	1.13968e-07	2.87036e-05	1.62126e-05	SEC22B/UBQLN2/RIPK2/PAFAH1B2/HMOX1/SLC25A5	6	BP
GO:0006979	response to oxidative stress	8/28	434/18614	1.69021e-07	3.72481e-05	2.10387e-05	FOXO3/EGFR/CAMKK2/HMOX1/HSPB1/FXN/CTNNB1/TRAP1	8	BP
GO:0031331	positive regulation of cellular catabolic process	8/28	450/18614	2.22836e-07	4.3651e-05	2.46553e-05	FOXO3/UBQLN2/RIPK2/CAMKK2/PAFAH1B2/PTEN/HMOX1/SLC25A5	8	BP
GO:0016236	macroautophagy	7/28	322/18614	3.76369e-07	6.63538e-05	3.74784e-05	SEC22B/UBQLN2/RIPK2/PAFAH1B2/HMOX1/CTSD/SLC25A5	7	BP
GO:2001234	negative regulation of apoptotic signaling pathway	6/28	233/18614	1.07911e-06	0.000172951	9.76874e-05	HMOX1/HSPB1/FXN/SLC25A5/CTNNB1/TRAP1	6	BP
GO:0097091	synaptic vesicle clustering	3/28	16/18614	1.68478e-06	0.000247523	0.000139807	BRSK2/PTEN/CTNNB1	3	BP
GO:0016239	positive regulation of macroautophagy	4/28	75/18614	4.62512e-06	0.000627237	0.00035428	RIPK2/PAFAH1B2/HMOX1/SLC25A5	4	BP
GO:0060571	morphogenesis of an epithelial fold	3/28	24/18614	6.0404e-06	0.000760659	0.000429641	EGFR/TP63/CTNNB1	3	BP
GO:0001667	ameboidal-type cell migration	7/28	496/18614	6.65936e-06	0.000782697	0.000442088	RAC1/SGPL1/PTEN/S100A9/HMOX1/HSPB1/APPL1	7	BP
GO:0000302	response to reactive oxygen species	5/28	205/18614	1.23389e-05	0.00135959	0.000767935	EGFR/CAMKK2/HMOX1/FXN/TRAP1	5	BP
GO:0010039	response to iron ion	3/28	31/18614	1.33206e-05	0.00138142	0.000780263	HMOX1/FXN/CCND1	3	BP
GO:0045862	positive regulation of proteolysis	6/28	365/18614	1.42685e-05	0.00139752	0.000789355	UBQLN2/RIPK2/PTEN/S100A8/S100A9/CTSD	6	BP
GO:0050679	positive regulation of epithelial cell proliferation	5/28	225/18614	1.93353e-05	0.00179411	0.00101336	EGFR/HMOX1/TP63/CCND1/CTNNB1	5	BP
GO:2000116	regulation of cysteine-type endopeptidase activity	5/28	234/18614	2.33468e-05	0.00205802	0.00116242	RIPK2/S100A8/S100A9/CTSD/TP63	5	BP
GO:0051402	neuron apoptotic process	5/28	259/18614	3.79516e-05	0.00318613	0.00179961	FOXO3/HMOX1/TP63/CCND1/CTNNB1	5	BP
GO:0051091	positive regulation of DNA-binding transcription factor activity	5/28	271/18614	4.70909e-05	0.00362978	0.0020502	RIPK2/PTEN/S100A8/S100A9/CTNNB1	5	BP
GO:0016055	Wnt signaling pathway	6/28	461/18614	5.29514e-05	0.00362978	0.0020502	RAC1/EGFR/PTEN/DAPK3/CCND1/CTNNB1	6	BP
GO:0198738	cell-cell signaling by wnt	6/28	463/18614	5.42412e-05	0.00362978	0.0020502	RAC1/EGFR/PTEN/DAPK3/CCND1/CTNNB1	6	BP
GO:2001235	positive regulation of apoptotic signaling pathway	4/28	140/18614	5.45475e-05	0.00362978	0.0020502	PTEN/S100A8/S100A9/TP63	4	BP
GO:0051090	regulation of DNA-binding transcription factor activity	6/28	465/18614	5.55561e-05	0.00362978	0.0020502	RIPK2/PTEN/S100A8/S100A9/HMOX1/CTNNB1	6	BP
GO:0048546	digestive tract morphogenesis	3/28	50/18614	5.69822e-05	0.00362978	0.0020502	EGFR/TP63/CTNNB1	3	BP
GO:2001056	positive regulation of cysteine-type endopeptidase activity	4/28	142/18614	5.76483e-05	0.00362978	0.0020502	RIPK2/S100A8/S100A9/CTSD	4	BP
GO:0030857	negative regulation of epithelial cell differentiation	3/28	54/18614	7.18217e-05	0.0040543	0.00228998	TP63/CCND1/CTNNB1	3	BP
GO:0097479	synaptic vesicle localization	3/28	54/18614	7.18217e-05	0.0040543	0.00228998	BRSK2/PTEN/CTNNB1	3	BP
GO:0034614	cellular response to reactive oxygen species	4/28	152/18614	7.51192e-05	0.0040543	0.00228998	EGFR/CAMKK2/FXN/TRAP1	4	BP
GO:0010761	fibroblast migration	3/28	55/18614	7.58888e-05	0.0040543	0.00228998	RAC1/SGPL1/APPL1	3	BP
GO:1903202	negative regulation of oxidative stress-induced cell death	3/28	55/18614	7.58888e-05	0.0040543	0.00228998	HSPB1/CTNNB1/TRAP1	3	BP
GO:0030307	positive regulation of cell growth	4/28	164/18614	0.000100843	0.005229	0.00295348	EGFR/S100A8/S100A9/FXN	4	BP
GO:0010950	positive regulation of endopeptidase activity	4/28	171/18614	0.000118516	0.00551316	0.00311398	RIPK2/S100A8/S100A9/CTSD	4	BP
GO:0060742	epithelial cell differentiation involved in prostate gland development	2/28	11/18614	0.000119011	0.00551316	0.00311398	TP63/CTNNB1	2	BP
GO:0051893	regulation of focal adhesion assembly	3/28	64/18614	0.000119433	0.00551316	0.00311398	RAC1/PTEN/DAPK3	3	BP
GO:0090109	regulation of cell-substrate junction assembly	3/28	64/18614	0.000119433	0.00551316	0.00311398	RAC1/PTEN/DAPK3	3	BP
GO:2001242	regulation of intrinsic apoptotic signaling pathway	4/28	173/18614	0.000123953	0.00551316	0.00311398	S100A8/S100A9/HSPB1/TRAP1	4	BP
GO:0006879	intracellular iron ion homeostasis	3/28	65/18614	0.000125086	0.00551316	0.00311398	HMOX1/CP/FXN	3	BP
GO:0052548	regulation of endopeptidase activity	5/28	336/18614	0.000129926	0.00558682	0.00315558	RIPK2/S100A8/S100A9/CTSD/TP63	5	BP
GO:0033327	Leydig cell differentiation	2/28	12/18614	0.00014268	0.0058499	0.00330418	SGPL1/CCND1	2	BP
GO:0035112	genitalia morphogenesis	2/28	12/18614	0.00014268	0.0058499	0.00330418	TP63/CTNNB1	2	BP
GO:0150116	regulation of cell-substrate junction organization	3/28	69/18614	0.000149437	0.00598768	0.003382	RAC1/PTEN/DAPK3	3	BP
GO:0010952	positive regulation of peptidase activity	4/28	185/18614	0.000160461	0.0061876	0.00349492	RIPK2/S100A8/S100A9/CTSD	4	BP
GO:2000045	regulation of G1/S transition of mitotic cell cycle	4/28	186/18614	0.000163819	0.0061876	0.00349492	EGFR/PTEN/APPL1/CCND1	4	BP
GO:0070486	leukocyte aggregation	2/28	13/18614	0.000168465	0.0061876	0.00349492	S100A8/S100A9	2	BP
GO:1903599	positive regulation of autophagy of mitochondrion	2/28	13/18614	0.000168465	0.0061876	0.00349492	CAMKK2/SLC25A5	2	BP
GO:0001736	establishment of planar polarity	3/28	74/18614	0.000183962	0.0064865	0.00366375	BRSK2/RAC1/TP63	3	BP
GO:0007164	establishment of tissue polarity	3/28	74/18614	0.000183962	0.0064865	0.00366375	BRSK2/RAC1/TP63	3	BP
GO:0010038	response to metal ion	5/28	367/18614	0.000196104	0.00665736	0.00376026	EGFR/S100A8/HMOX1/FXN/CCND1	5	BP
GO:0070141	response to UV-A	2/28	14/18614	0.00019636	0.00665736	0.00376026	EGFR/CCND1	2	BP
GO:0010631	epithelial cell migration	5/28	371/18614	0.000206231	0.00685669	0.00387284	RAC1/PTEN/S100A9/HMOX1/HSPB1	5	BP
GO:0070997	neuron death	5/28	373/18614	0.000211442	0.00685669	0.00387284	FOXO3/HMOX1/TP63/CCND1/CTNNB1	5	BP
GO:0090132	epithelium migration	5/28	374/18614	0.000214085	0.00685669	0.00387284	RAC1/PTEN/S100A9/HMOX1/HSPB1	5	BP
GO:1903201	regulation of oxidative stress-induced cell death	3/28	79/18614	0.00022329	0.00685669	0.00387284	HSPB1/CTNNB1/TRAP1	3	BP
GO:0060572	morphogenesis of an epithelial bud	2/28	15/18614	0.000226359	0.00685669	0.00387284	TP63/CTNNB1	2	BP
GO:0090130	tissue migration	5/28	379/18614	0.000227682	0.00685669	0.00387284	RAC1/PTEN/S100A9/HMOX1/HSPB1	5	BP
GO:0042440	pigment metabolic process	3/28	80/18614	0.000231756	0.00685669	0.00387284	HMOX1/APPL1/FXN	3	BP
GO:0043281	regulation of cysteine-type endopeptidase activity involved in apoptotic process	4/28	204/18614	0.000233353	0.00685669	0.00387284	S100A8/S100A9/CTSD/TP63	4	BP
GO:1901888	regulation of cell junction assembly	4/28	214/18614	0.000280071	0.00793738	0.00448324	RAC1/PTEN/DAPK3/CTNNB1	4	BP
GO:1902806	regulation of cell cycle G1/S phase transition	4/28	214/18614	0.000280071	0.00793738	0.00448324	EGFR/PTEN/APPL1/CCND1	4	BP
GO:0048041	focal adhesion assembly	3/28	86/18614	0.000286942	0.00793738	0.00448324	RAC1/PTEN/DAPK3	3	BP
GO:0017014	protein nitrosylation	2/28	17/18614	0.000292643	0.00793738	0.00448324	S100A8/S100A9	2	BP
GO:0018119	peptidyl-cysteine S-nitrosylation	2/28	17/18614	0.000292643	0.00793738	0.00448324	S100A8/S100A9	2	BP
GO:0043523	regulation of neuron apoptotic process	4/28	219/18614	0.000305794	0.00816842	0.00461374	FOXO3/HMOX1/CCND1/CTNNB1	4	BP
GO:0055072	iron ion homeostasis	3/28	89/18614	0.000317453	0.00835328	0.00471815	HMOX1/CP/FXN	3	BP
GO:0001942	hair follicle development	3/28	91/18614	0.000338913	0.00876382	0.00495004	EGFR/TP63/CTNNB1	3	BP
GO:0050678	regulation of epithelial cell proliferation	5/28	419/18614	0.00036166	0.00876382	0.00495004	EGFR/HMOX1/TP63/CCND1/CTNNB1	5	BP
GO:0002523	leukocyte migration involved in inflammatory response	2/28	19/18614	0.000367271	0.00876382	0.00495004	S100A8/S100A9	2	BP
GO:1902176	negative regulation of oxidative stress-induced intrinsic apoptotic signaling pathway	2/28	19/18614	0.000367271	0.00876382	0.00495004	HSPB1/TRAP1	2	BP
GO:0001738	morphogenesis of a polarized epithelium	3/28	94/18614	0.000372823	0.00876382	0.00495004	BRSK2/RAC1/TP63	3	BP
GO:0022404	molting cycle process	3/28	94/18614	0.000372823	0.00876382	0.00495004	EGFR/TP63/CTNNB1	3	BP
GO:0022405	hair cycle process	3/28	94/18614	0.000372823	0.00876382	0.00495004	EGFR/TP63/CTNNB1	3	BP
GO:1900407	regulation of cellular response to oxidative stress	3/28	94/18614	0.000372823	0.00876382	0.00495004	HSPB1/CTNNB1/TRAP1	3	BP
GO:0052547	regulation of peptidase activity	5/28	425/18614	0.00038603	0.00895487	0.00505795	RIPK2/S100A8/S100A9/CTSD/TP63	5	BP
GO:0007044	cell-substrate junction assembly	3/28	96/18614	0.0003966	0.00903084	0.00510086	RAC1/PTEN/DAPK3	3	BP
GO:0010001	glial cell differentiation	4/28	235/18614	0.000399549	0.00903084	0.00510086	PTEN/S100A8/S100A9/CTNNB1	4	BP
GO:0002544	chronic inflammatory response	2/28	20/18614	0.0004077	0.00909841	0.00513903	S100A8/S100A9	2	BP
GO:0007160	cell-matrix adhesion	4/28	239/18614	0.000425878	0.00938528	0.00530105	RAC1/PTEN/DAPK3/CTNNB1	4	BP
GO:0036473	cell death in response to oxidative stress	3/28	99/18614	0.000434063	0.00944757	0.00533624	HSPB1/CTNNB1/TRAP1	3	BP
GO:0048732	gland development	5/28	441/18614	0.000457127	0.00982823	0.00555125	EGFR/HMOX1/TP63/CCND1/CTNNB1	5	BP
GO:0008630	intrinsic apoptotic signaling pathway in response to DNA damage	3/28	103/18614	0.000487452	0.0101103	0.00571059	HMOX1/TP63/PHLDA3	3	BP
GO:0150115	cell-substrate junction organization	3/28	103/18614	0.000487452	0.0101103	0.00571059	RAC1/PTEN/DAPK3	3	BP
GO:1902882	regulation of response to oxidative stress	3/28	103/18614	0.000487452	0.0101103	0.00571059	HSPB1/CTNNB1/TRAP1	3	BP
GO:0048485	sympathetic nervous system development	2/28	22/18614	0.000494756	0.0101425	0.00572875	TP63/CTNNB1	2	BP
GO:0000082	G1/S transition of mitotic cell cycle	4/28	251/18614	0.000512312	0.0103817	0.00586385	EGFR/PTEN/APPL1/CCND1	4	BP
GO:0030593	neutrophil chemotaxis	3/28	107/18614	0.000544886	0.0109163	0.00616582	RAC1/S100A8/S100A9	3	BP
GO:0043122	regulation of I-kappaB kinase/NF-kappaB signaling	4/28	258/18614	0.000568153	0.0111295	0.00628623	RIPK2/HMOX1/HSPB1/CTNNB1	4	BP
GO:0045927	positive regulation of growth	4/28	258/18614	0.000568153	0.0111295	0.00628623	EGFR/S100A8/S100A9/FXN	4	BP
GO:0000045	autophagosome assembly	3/28	109/18614	0.000575159	0.0111429	0.00629381	SEC22B/UBQLN2/CTSD	3	BP
GO:0044772	mitotic cell cycle phase transition	5/28	467/18614	0.000593293	0.0113693	0.00642168	BRSK2/EGFR/PTEN/APPL1/CCND1	5	BP
GO:0051341	regulation of oxidoreductase activity	3/28	111/18614	0.000606489	0.0114972	0.00649393	EGFR/GLA/FXN	3	BP
GO:0000079	regulation of cyclin-dependent protein serine/threonine kinase activity	3/28	112/18614	0.000622555	0.0116762	0.00659504	EGFR/PTEN/CCND1	3	BP
GO:0042303	molting cycle	3/28	115/18614	0.000672381	0.0122207	0.00690258	EGFR/TP63/CTNNB1	3	BP
GO:0042633	hair cycle	3/28	115/18614	0.000672381	0.0122207	0.00690258	EGFR/TP63/CTNNB1	3	BP
GO:1905037	autophagosome organization	3/28	115/18614	0.000672381	0.0122207	0.00690258	SEC22B/UBQLN2/CTSD	3	BP
GO:1904029	regulation of cyclin-dependent protein kinase activity	3/28	116/18614	0.000689539	0.0122264	0.00690579	EGFR/PTEN/CCND1	3	BP
GO:0051051	negative regulation of transport	5/28	483/18614	0.000691069	0.0122264	0.00690579	UBQLN2/RAC1/PTEN/HMOX1/APPL1	5	BP
GO:0051238	sequestering of metal ion	2/28	26/18614	0.000693499	0.0122264	0.00690579	S100A8/S100A9	2	BP
GO:0050673	epithelial cell proliferation	5/28	488/18614	0.000723976	0.0126373	0.0071379	EGFR/HMOX1/TP63/CCND1/CTNNB1	5	BP
GO:0021782	glial cell development	3/28	119/18614	0.000742683	0.0128368	0.00725055	PTEN/S100A8/S100A9	3	BP
GO:0032355	response to estradiol	3/28	120/18614	0.000760961	0.0130102	0.00734848	EGFR/CCND1/CTNNB1	3	BP
GO:0016049	cell growth	5/28	495/18614	0.000772011	0.0130102	0.00734848	EGFR/S100A8/S100A9/FXN/CTNNB1	5	BP
GO:0098773	skin epidermis development	3/28	121/18614	0.000779523	0.0130102	0.00734848	EGFR/TP63/CTNNB1	3	BP
GO:0044843	cell cycle G1/S phase transition	4/28	281/18614	0.000782233	0.0130102	0.00734848	EGFR/PTEN/APPL1/CCND1	4	BP
GO:0007548	sex differentiation	4/28	283/18614	0.000803204	0.0130218	0.00735509	SGPL1/TP63/CCND1/CTNNB1	4	BP
GO:0043542	endothelial cell migration	4/28	283/18614	0.000803204	0.0130218	0.00735509	RAC1/S100A9/HMOX1/HSPB1	4	BP
GO:0035116	embryonic hindlimb morphogenesis	2/28	28/18614	0.000805094	0.0130218	0.00735509	TP63/CTNNB1	2	BP
GO:0043280	positive regulation of cysteine-type endopeptidase activity involved in apoptotic process	3/28	124/18614	0.000836937	0.0134138	0.00757649	S100A8/S100A9/CTSD	3	BP
GO:0001952	regulation of cell-matrix adhesion	3/28	125/18614	0.000856657	0.0135991	0.00768116	RAC1/PTEN/DAPK3	3	BP
GO:1902175	regulation of oxidative stress-induced intrinsic apoptotic signaling pathway	2/28	29/18614	0.000863927	0.0135991	0.00768116	HSPB1/TRAP1	2	BP
GO:0007249	I-kappaB kinase/NF-kappaB signaling	4/28	293/18614	0.000914082	0.0140216	0.00791979	RIPK2/HMOX1/HSPB1/CTNNB1	4	BP
GO:1990266	neutrophil migration	3/28	128/18614	0.000917582	0.0140216	0.00791979	RAC1/S100A8/S100A9	3	BP
GO:0006882	intracellular zinc ion homeostasis	2/28	30/18614	0.000924776	0.0140216	0.00791979	S100A8/S100A9	2	BP
GO:0097421	liver regeneration	2/28	30/18614	0.000924776	0.0140216	0.00791979	HMOX1/CCND1	2	BP
GO:0010632	regulation of epithelial cell migration	4/28	295/18614	0.000937491	0.0140216	0.00791979	RAC1/PTEN/HMOX1/HSPB1	4	BP
GO:0042542	response to hydrogen peroxide	3/28	129/18614	0.000938486	0.0140216	0.00791979	HMOX1/FXN/TRAP1	3	BP
GO:0010595	positive regulation of endothelial cell migration	3/28	131/18614	0.000981197	0.0142721	0.00806128	RAC1/HMOX1/HSPB1	3	BP
GO:0071621	granulocyte chemotaxis	3/28	131/18614	0.000981197	0.0142721	0.00806128	RAC1/S100A8/S100A9	3	BP
GO:0030149	sphingolipid catabolic process	2/28	31/18614	0.000987635	0.0142721	0.00806128	SGPL1/GLA	2	BP
GO:0071276	cellular response to cadmium ion	2/28	31/18614	0.000987635	0.0142721	0.00806128	EGFR/HMOX1	2	BP
GO:0048608	reproductive structure development	4/28	301/18614	0.00101026	0.0144804	0.00817891	SGPL1/TP63/CCND1/CTNNB1	4	BP
GO:0048565	digestive tract development	3/28	134/18614	0.00104755	0.0147266	0.00831799	EGFR/TP63/CTNNB1	3	BP
GO:0031069	hair follicle morphogenesis	2/28	32/18614	0.0010525	0.0147266	0.00831799	TP63/CTNNB1	2	BP
GO:0035115	embryonic forelimb morphogenesis	2/28	32/18614	0.0010525	0.0147266	0.00831799	TP63/CTNNB1	2	BP
GO:0061458	reproductive system development	4/28	305/18614	0.00106093	0.0147278	0.00831863	SGPL1/TP63/CCND1/CTNNB1	4	BP
GO:0018105	peptidyl-serine phosphorylation	4/28	309/18614	0.00111337	0.015335	0.00866162	BRSK2/EGFR/RIPK2/PTEN	4	BP
GO:0060326	cell chemotaxis	4/28	312/18614	0.00115389	0.0157138	0.00887558	RAC1/S100A8/S100A9/HSPB1	4	BP
GO:0034101	erythrocyte homeostasis	3/28	139/18614	0.00116433	0.0157138	0.00887558	FOXO3/HMOX1/SLC25A5	3	BP
GO:0060070	canonical Wnt signaling pathway	4/28	313/18614	0.00116762	0.0157138	0.00887558	EGFR/PTEN/DAPK3/CTNNB1	4	BP
GO:0009954	proximal/distal pattern formation	2/28	34/18614	0.00118822	0.0157506	0.00889634	TP63/CTNNB1	2	BP
GO:0016242	negative regulation of macroautophagy	2/28	34/18614	0.00118822	0.0157506	0.00889634	SEC22B/HMOX1	2	BP
GO:0035137	hindlimb morphogenesis	2/28	35/18614	0.00125906	0.0164241	0.00927679	TP63/CTNNB1	2	BP
GO:0033135	regulation of peptidyl-serine phosphorylation	3/28	143/18614	0.00126346	0.0164241	0.00927679	EGFR/RIPK2/PTEN	3	BP
GO:0042063	gliogenesis	4/28	320/18614	0.00126698	0.0164241	0.00927679	PTEN/S100A8/S100A9/CTNNB1	4	BP
GO:0048261	negative regulation of receptor-mediated endocytosis	2/28	36/18614	0.00133188	0.017011	0.00960826	UBQLN2/RAC1	2	BP
GO:0048730	epidermis morphogenesis	2/28	36/18614	0.00133188	0.017011	0.00960826	TP63/CTNNB1	2	BP
GO:0055123	digestive system development	3/28	146/18614	0.00134119	0.017011	0.00960826	EGFR/TP63/CTNNB1	3	BP
GO:0018209	peptidyl-serine modification	4/28	327/18614	0.00137214	0.0171566	0.00969052	BRSK2/EGFR/RIPK2/PTEN	4	BP
GO:1901214	regulation of neuron death	4/28	327/18614	0.00137214	0.0171566	0.00969052	FOXO3/HMOX1/CCND1/CTNNB1	4	BP
GO:0046466	membrane lipid catabolic process	2/28	37/18614	0.00140668	0.0173425	0.00979552	SGPL1/GLA	2	BP
GO:1903146	regulation of autophagy of mitochondrion	2/28	37/18614	0.00140668	0.0173425	0.00979552	CAMKK2/SLC25A5	2	BP
GO:0010821	regulation of mitochondrion organization	3/28	151/18614	0.00147735	0.0180872	0.0102162	CAMKK2/FXN/SLC25A5	3	BP
GO:0045737	positive regulation of cyclin-dependent protein serine/threonine kinase activity	2/28	39/18614	0.00156219	0.0188639	0.0106549	EGFR/CCND1	2	BP
GO:0046621	negative regulation of organ growth	2/28	39/18614	0.00156219	0.0188639	0.0106549	PTEN/FXN	2	BP
GO:0097530	granulocyte migration	3/28	156/18614	0.0016219	0.0194389	0.0109796	RAC1/S100A8/S100A9	3	BP
GO:0010762	regulation of fibroblast migration	2/28	40/18614	0.00164288	0.0194389	0.0109796	RAC1/APPL1	2	BP
GO:0035136	forelimb morphogenesis	2/28	40/18614	0.00164288	0.0194389	0.0109796	TP63/CTNNB1	2	BP
GO:0051092	positive regulation of NF-kappaB transcription factor activity	3/28	159/18614	0.00171275	0.0201305	0.0113703	RIPK2/S100A8/S100A9	3	BP
GO:0050999	regulation of nitric-oxide synthase activity	2/28	42/18614	0.00181012	0.020995	0.0118585	EGFR/GLA	2	BP
GO:1904031	positive regulation of cyclin-dependent protein kinase activity	2/28	42/18614	0.00181012	0.020995	0.0118585	EGFR/CCND1	2	BP
GO:1901990	regulation of mitotic cell cycle phase transition	4/28	357/18614	0.00189282	0.0215729	0.012185	EGFR/PTEN/APPL1/CCND1	4	BP
GO:0014002	astrocyte development	2/28	43/18614	0.00189666	0.0215729	0.012185	S100A8/S100A9	2	BP
GO:0034142	toll-like receptor 4 signaling pathway	2/28	43/18614	0.00189666	0.0215729	0.012185	RIPK2/APPL1	2	BP
GO:0031589	cell-substrate adhesion	4/28	359/18614	0.00193179	0.0217509	0.0122855	RAC1/PTEN/DAPK3/CTNNB1	4	BP
GO:0030856	regulation of epithelial cell differentiation	3/28	166/18614	0.00193698	0.0217509	0.0122855	TP63/CCND1/CTNNB1	3	BP
GO:0042771	intrinsic apoptotic signaling pathway in response to DNA damage by p53 class mediator	2/28	44/18614	0.00198513	0.0220112	0.0124325	TP63/PHLDA3	2	BP
GO:2000785	regulation of autophagosome assembly	2/28	44/18614	0.00198513	0.0220112	0.0124325	SEC22B/UBQLN2	2	BP
GO:0046661	male sex differentiation	3/28	168/18614	0.00200424	0.0220843	0.0124738	SGPL1/CCND1/CTNNB1	3	BP
GO:0008631	intrinsic apoptotic signaling pathway in response to oxidative stress	2/28	45/18614	0.00207553	0.0224488	0.0126797	HSPB1/TRAP1	2	BP
GO:0048483	autonomic nervous system development	2/28	45/18614	0.00207553	0.0224488	0.0126797	TP63/CTNNB1	2	BP
GO:1904706	negative regulation of vascular associated smooth muscle cell proliferation	2/28	45/18614	0.00207553	0.0224488	0.0126797	PTEN/HMOX1	2	BP
GO:0002262	myeloid cell homeostasis	3/28	171/18614	0.00210786	0.0226595	0.0127987	FOXO3/HMOX1/SLC25A5	3	BP
GO:0042168	heme metabolic process	2/28	46/18614	0.00216786	0.0231632	0.0130832	HMOX1/FXN	2	BP
GO:0048806	genitalia development	2/28	47/18614	0.00226211	0.0238669	0.0134807	TP63/CTNNB1	2	BP
GO:0030336	negative regulation of cell migration	4/28	375/18614	0.00226386	0.0238669	0.0134807	FOXO3/RAC1/PTEN/HMOX1	4	BP
GO:0010634	positive regulation of epithelial cell migration	3/28	176/18614	0.00228786	0.0238669	0.0134807	RAC1/HMOX1/HSPB1	3	BP
GO:0048660	regulation of smooth muscle cell proliferation	3/28	176/18614	0.00228786	0.0238669	0.0134807	PTEN/HMOX1/CTNNB1	3	BP
GO:0021795	cerebral cortex cell migration	2/28	48/18614	0.00235827	0.0243136	0.013733	EGFR/CTNNB1	2	BP
GO:0030850	prostate gland development	2/28	48/18614	0.00235827	0.0243136	0.013733	TP63/CTNNB1	2	BP
GO:0048659	smooth muscle cell proliferation	3/28	180/18614	0.00243856	0.0249952	0.014118	PTEN/HMOX1/CTNNB1	3	BP
GO:0140895	cell surface toll-like receptor signaling pathway	2/28	49/18614	0.00245634	0.0250319	0.0141387	RIPK2/APPL1	2	BP
GO:0018198	peptidyl-cysteine modification	2/28	50/18614	0.00255631	0.0256067	0.0144633	S100A8/S100A9	2	BP
GO:0044088	regulation of vacuole organization	2/28	50/18614	0.00255631	0.0256067	0.0144633	SEC22B/UBQLN2	2	BP
GO:1902041	regulation of extrinsic apoptotic signaling pathway via death domain receptors	2/28	50/18614	0.00255631	0.0256067	0.0144633	PTEN/HMOX1	2	BP
GO:0021543	pallium development	3/28	184/18614	0.00259528	0.0258442	0.0145975	EGFR/PTEN/CTNNB1	3	BP
GO:2000146	negative regulation of cell motility	4/28	390/18614	0.00260934	0.0258442	0.0145975	FOXO3/RAC1/PTEN/HMOX1	4	BP
GO:0061082	myeloid leukocyte cytokine production	2/28	51/18614	0.00265818	0.0259855	0.0146773	RIPK2/HMOX1	2	BP
GO:1902895	positive regulation of miRNA transcription	2/28	51/18614	0.00265818	0.0259855	0.0146773	FOXO3/EGFR	2	BP
GO:0051896	regulation of protein kinase B signaling	3/28	186/18614	0.00267594	0.0259855	0.0146773	EGFR/PTEN/PHLDA3	3	BP
GO:0050900	leukocyte migration	4/28	393/18614	0.00268256	0.0259855	0.0146773	RAC1/S100A8/S100A9/HMOX1	4	BP
GO:0006778	porphyrin-containing compound metabolic process	2/28	53/18614	0.00286759	0.0273274	0.0154352	HMOX1/FXN	2	BP
GO:0010823	negative regulation of mitochondrion organization	2/28	53/18614	0.00286759	0.0273274	0.0154352	FXN/SLC25A5	2	BP
GO:2000648	positive regulation of stem cell proliferation	2/28	53/18614	0.00286759	0.0273274	0.0154352	TP63/CTNNB1	2	BP
GO:0043123	positive regulation of I-kappaB kinase/NF-kappaB signaling	3/28	192/18614	0.00292717	0.0277452	0.0156712	RIPK2/HMOX1/CTNNB1	3	BP
GO:0046686	response to cadmium ion	2/28	54/18614	0.00297512	0.0280489	0.0158428	EGFR/HMOX1	2	BP
GO:0043525	positive regulation of neuron apoptotic process	2/28	55/18614	0.00308453	0.0287726	0.0162515	FOXO3/CTNNB1	2	BP
GO:1900087	positive regulation of G1/S transition of mitotic cell cycle	2/28	55/18614	0.00308453	0.0287726	0.0162515	EGFR/CCND1	2	BP
GO:0099504	synaptic vesicle cycle	3/28	198/18614	0.00319252	0.0291928	0.0164888	BRSK2/PTEN/CTNNB1	3	BP
GO:0002752	cell surface pattern recognition receptor signaling pathway	2/28	56/18614	0.0031958	0.0291928	0.0164888	RIPK2/APPL1	2	BP
GO:0045806	negative regulation of endocytosis	2/28	56/18614	0.0031958	0.0291928	0.0164888	UBQLN2/RAC1	2	BP
GO:0050832	defense response to fungus	2/28	56/18614	0.0031958	0.0291928	0.0164888	S100A8/S100A9	2	BP
GO:0007159	leukocyte cell-cell adhesion	4/28	415/18614	0.00326339	0.0296565	0.0167508	FOXO3/RIPK2/S100A8/S100A9	4	BP
GO:0032768	regulation of monooxygenase activity	2/28	57/18614	0.00330894	0.0297636	0.0168113	EGFR/GLA	2	BP
GO:0046148	pigment biosynthetic process	2/28	57/18614	0.00330894	0.0297636	0.0168113	APPL1/FXN	2	BP
GO:0001558	regulation of cell growth	4/28	420/18614	0.0034065	0.0304856	0.0172191	EGFR/S100A8/S100A9/FXN	4	BP
GO:0030098	lymphocyte differentiation	4/28	422/18614	0.00346493	0.0308519	0.017426	FOXO3/RIPK2/SLC25A5/CTNNB1	4	BP
GO:0051898	negative regulation of protein kinase B signaling	2/28	59/18614	0.00354079	0.0313689	0.017718	PTEN/PHLDA3	2	BP
GO:0040013	negative regulation of locomotion	4/28	427/18614	0.00361401	0.0318575	0.017994	FOXO3/RAC1/PTEN/HMOX1	4	BP
GO:2000630	positive regulation of miRNA metabolic process	2/28	60/18614	0.00365949	0.0320979	0.0181298	FOXO3/EGFR	2	BP
GO:0022029	telencephalon cell migration	2/28	61/18614	0.00378004	0.0329911	0.0186343	EGFR/CTNNB1	2	BP
GO:0033013	tetrapyrrole metabolic process	2/28	62/18614	0.00390242	0.0337253	0.0190489	HMOX1/FXN	2	BP
GO:0045428	regulation of nitric oxide biosynthetic process	2/28	62/18614	0.00390242	0.0337253	0.0190489	RAC1/GLA	2	BP
GO:0030100	regulation of endocytosis	3/28	214/18614	0.00397109	0.0338045	0.0190937	UBQLN2/RAC1/APPL1	3	BP
GO:0042060	wound healing	4/28	439/18614	0.00398959	0.0338045	0.0190937	PTEN/S100A8/HMOX1/HSPB1	4	BP
GO:0043491	protein kinase B signaling	3/28	215/18614	0.00402325	0.0338045	0.0190937	EGFR/PTEN/PHLDA3	3	BP
GO:0051648	vesicle localization	3/28	215/18614	0.00402325	0.0338045	0.0190937	BRSK2/PTEN/CTNNB1	3	BP
GO:0032731	positive regulation of interleukin-1 beta production	2/28	63/18614	0.00402663	0.0338045	0.0190937	RIPK2/HSPB1	2	BP
GO:2001244	positive regulation of intrinsic apoptotic signaling pathway	2/28	63/18614	0.00402663	0.0338045	0.0190937	S100A8/S100A9	2	BP
GO:0031349	positive regulation of defense response	4/28	441/18614	0.00405467	0.0338786	0.0191355	RIPK2/S100A8/S100A9/APPL1	4	BP
GO:0007033	vacuole organization	3/28	217/18614	0.00412883	0.0340599	0.0192379	SEC22B/UBQLN2/CTSD	3	BP
GO:0021885	forebrain cell migration	2/28	64/18614	0.00415267	0.0340599	0.0192379	EGFR/CTNNB1	2	BP
GO:0040014	regulation of multicellular organism growth	2/28	64/18614	0.00415267	0.0340599	0.0192379	SGPL1/FXN	2	BP
GO:0034329	cell junction assembly	4/28	444/18614	0.00415365	0.0340599	0.0192379	RAC1/PTEN/DAPK3/CTNNB1	4	BP
GO:1901215	negative regulation of neuron death	3/28	219/18614	0.00423609	0.0345751	0.0195289	HMOX1/CCND1/CTNNB1	3	BP
GO:0080164	regulation of nitric oxide metabolic process	2/28	65/18614	0.00428053	0.0346967	0.0195976	RAC1/GLA	2	BP
GO:0099003	vesicle-mediated transport in synapse	3/28	220/18614	0.00429035	0.0346967	0.0195976	BRSK2/PTEN/CTNNB1	3	BP
GO:0010810	regulation of cell-substrate adhesion	3/28	222/18614	0.00440014	0.0351818	0.0198716	RAC1/PTEN/DAPK3	3	BP
GO:0001655	urogenital system development	2/28	66/18614	0.0044102	0.0351818	0.0198716	TP63/CTNNB1	2	BP
GO:0031100	animal organ regeneration	2/28	66/18614	0.0044102	0.0351818	0.0198716	HMOX1/CCND1	2	BP
GO:0009620	response to fungus	2/28	67/18614	0.00454169	0.0360676	0.0203719	S100A8/S100A9	2	BP
GO:1901987	regulation of cell cycle phase transition	4/28	457/18614	0.00460158	0.0363636	0.0205391	EGFR/PTEN/APPL1/CCND1	4	BP
GO:0048645	animal organ formation	2/28	68/18614	0.00467498	0.0363636	0.0205391	TP63/CTNNB1	2	BP
GO:1902808	positive regulation of cell cycle G1/S phase transition	2/28	68/18614	0.00467498	0.0363636	0.0205391	EGFR/CCND1	2	BP
GO:1902893	regulation of miRNA transcription	2/28	68/18614	0.00467498	0.0363636	0.0205391	FOXO3/EGFR	2	BP
GO:0046777	protein autophosphorylation	3/28	227/18614	0.00468209	0.0363636	0.0205391	EGFR/CAMKK2/DAPK3	3	BP
GO:0061077	chaperone-mediated protein folding	2/28	69/18614	0.00481007	0.0370312	0.0209162	HSPB1/TRAP1	2	BP
GO:0061614	miRNA transcription	2/28	69/18614	0.00481007	0.0370312	0.0209162	FOXO3/EGFR	2	BP
GO:0032722	positive regulation of chemokine production	2/28	70/18614	0.00494696	0.0377553	0.0213252	RIPK2/HMOX1	2	BP
GO:0043627	response to estrogen	2/28	70/18614	0.00494696	0.0377553	0.0213252	HMOX1/CCND1	2	BP
GO:0010594	regulation of endothelial cell migration	3/28	232/18614	0.0049748	0.0378042	0.0213528	RAC1/HMOX1/HSPB1	3	BP
GO:1904888	cranial skeletal system development	2/28	72/18614	0.00522609	0.0394443	0.0222792	TP63/CTNNB1	2	BP
GO:1903131	mononuclear cell differentiation	4/28	474/18614	0.00523537	0.0394443	0.0222792	FOXO3/RIPK2/SLC25A5/CTNNB1	4	BP
GO:0002067	glandular epithelial cell differentiation	2/28	74/18614	0.00551234	0.0409576	0.023134	TP63/CTNNB1	2	BP
GO:0032732	positive regulation of interleukin-1 production	2/28	74/18614	0.00551234	0.0409576	0.023134	RIPK2/HSPB1	2	BP
GO:0030595	leukocyte chemotaxis	3/28	241/18614	0.00552916	0.0409576	0.023134	RAC1/S100A8/S100A9	3	BP
GO:0097529	myeloid leukocyte migration	3/28	241/18614	0.00552916	0.0409576	0.023134	RAC1/S100A8/S100A9	3	BP
GO:0045930	negative regulation of mitotic cell cycle	3/28	243/18614	0.00565721	0.0410504	0.0231864	PTEN/CCND1/CTNNB1	3	BP
GO:0010822	positive regulation of mitochondrion organization	2/28	75/18614	0.00565811	0.0410504	0.0231864	CAMKK2/SLC25A5	2	BP
GO:0043536	positive regulation of blood vessel endothelial cell migration	2/28	75/18614	0.00565811	0.0410504	0.0231864	HMOX1/HSPB1	2	BP
GO:0045669	positive regulation of osteoblast differentiation	2/28	75/18614	0.00565811	0.0410504	0.0231864	TP63/CTNNB1	2	BP
GO:0048662	negative regulation of smooth muscle cell proliferation	2/28	75/18614	0.00565811	0.0410504	0.0231864	PTEN/HMOX1	2	BP
GO:0006919	activation of cysteine-type endopeptidase activity involved in apoptotic process	2/28	76/18614	0.00580565	0.0419482	0.0236935	S100A8/S100A9	2	BP
GO:0001819	positive regulation of cytokine production	4/28	489/18614	0.00584146	0.0420347	0.0237423	RIPK2/HMOX1/HSPB1/APPL1	4	BP
GO:0006809	nitric oxide biosynthetic process	2/28	77/18614	0.00595495	0.0426772	0.0241052	RAC1/GLA	2	BP
GO:0033002	muscle cell proliferation	3/28	249/18614	0.00605205	0.0431974	0.0243991	PTEN/HMOX1/CTNNB1	3	BP
GO:0002220	innate immune response activating cell surface receptor signaling pathway	2/28	78/18614	0.006106	0.0434068	0.0245173	RIPK2/APPL1	2	BP
GO:0097305	response to alcohol	3/28	252/18614	0.00625553	0.0442912	0.0250168	S100A8/CCND1/CTNNB1	3	BP
GO:1903320	regulation of protein modification by small protein conjugation or removal	3/28	255/18614	0.00646309	0.0455777	0.0257435	RIPK2/PTEN/CTNNB1	3	BP
GO:2000628	regulation of miRNA metabolic process	2/28	81/18614	0.00656962	0.0461444	0.0260636	FOXO3/EGFR	2	BP
GO:0034976	response to endoplasmic reticulum stress	3/28	259/18614	0.00674621	0.0471967	0.0266579	BRSK2/UBQLN2/CCND1	3	BP
GO:0060828	regulation of canonical Wnt signaling pathway	3/28	260/18614	0.00681813	0.0474313	0.0267905	EGFR/DAPK3/CTNNB1	3	BP
GO:0001570	vasculogenesis	2/28	83/18614	0.00688736	0.0474313	0.0267905	SGPL1/CTNNB1	2	BP
GO:0046209	nitric oxide metabolic process	2/28	83/18614	0.00688736	0.0474313	0.0267905	RAC1/GLA	2	BP
GO:0072332	intrinsic apoptotic signaling pathway by p53 class mediator	2/28	83/18614	0.00688736	0.0474313	0.0267905	TP63/PHLDA3	2	BP
GO:2001057	reactive nitrogen species metabolic process	2/28	84/18614	0.00704881	0.0483543	0.0273118	RAC1/GLA	2	BP
GO:0008625	extrinsic apoptotic signaling pathway via death domain receptors	2/28	86/18614	0.00737687	0.0500208	0.0282531	PTEN/HMOX1	2	BP
GO:0033077	T cell differentiation in thymus	2/28	86/18614	0.00737687	0.0500208	0.0282531	RIPK2/CTNNB1	2	BP
GO:2000134	negative regulation of G1/S transition of mitotic cell cycle	2/28	86/18614	0.00737687	0.0500208	0.0282531	PTEN/CCND1	2	BP
GO:0010507	negative regulation of autophagy	2/28	87/18614	0.00754345	0.050504	0.028526	SEC22B/HMOX1	2	BP
GO:0048145	regulation of fibroblast proliferation	2/28	87/18614	0.00754345	0.050504	0.028526	EGFR/CTNNB1	2	BP
GO:0048708	astrocyte differentiation	2/28	87/18614	0.00754345	0.050504	0.028526	S100A8/S100A9	2	BP
GO:0021537	telencephalon development	3/28	270/18614	0.00756271	0.050504	0.028526	EGFR/PTEN/CTNNB1	3	BP
GO:0042475	odontogenesis of dentin-containing tooth	2/28	91/18614	0.00822676	0.0545255	0.0307974	TP63/CTNNB1	2	BP
GO:0072091	regulation of stem cell proliferation	2/28	91/18614	0.00822676	0.0545255	0.0307974	TP63/CTNNB1	2	BP
GO:0000422	autophagy of mitochondrion	2/28	92/18614	0.0084018	0.0550646	0.0311019	CAMKK2/SLC25A5	2	BP
GO:0061726	mitochondrion disassembly	2/28	92/18614	0.0084018	0.0550646	0.0311019	CAMKK2/SLC25A5	2	BP
GO:1901216	positive regulation of neuron death	2/28	92/18614	0.0084018	0.0550646	0.0311019	FOXO3/CTNNB1	2	BP
GO:0061912	selective autophagy	2/28	93/18614	0.00857851	0.0558078	0.0315217	RIPK2/SLC25A5	2	BP
GO:0070301	cellular response to hydrogen peroxide	2/28	93/18614	0.00857851	0.0558078	0.0315217	FXN/TRAP1	2	BP
GO:1904705	regulation of vascular associated smooth muscle cell proliferation	2/28	95/18614	0.00893695	0.0579259	0.0327181	PTEN/HMOX1	2	BP
GO:0010586	miRNA metabolic process	2/28	97/18614	0.00930202	0.0596344	0.0336831	FOXO3/EGFR	2	BP
GO:1902807	negative regulation of cell cycle G1/S phase transition	2/28	97/18614	0.00930202	0.0596344	0.0336831	PTEN/CCND1	2	BP
GO:1990874	vascular associated smooth muscle cell proliferation	2/28	97/18614	0.00930202	0.0596344	0.0336831	PTEN/HMOX1	2	BP
GO:0032642	regulation of chemokine production	2/28	98/18614	0.00948704	0.0606002	0.0342286	RIPK2/HMOX1	2	BP
GO:0032602	chemokine production	2/28	99/18614	0.0096737	0.061128	0.0345268	RIPK2/HMOX1	2	BP
GO:1901992	positive regulation of mitotic cell cycle phase transition	2/28	99/18614	0.0096737	0.061128	0.0345268	EGFR/CCND1	2	BP
GO:2001243	negative regulation of intrinsic apoptotic signaling pathway	2/28	99/18614	0.0096737	0.061128	0.0345268	HSPB1/TRAP1	2	BP
GO:0048709	oligodendrocyte differentiation	2/28	101/18614	0.0100519	0.0632342	0.0357164	PTEN/CTNNB1	2	BP
GO:0030217	T cell differentiation	3/28	300/18614	0.0100787	0.0632342	0.0357164	FOXO3/RIPK2/CTNNB1	3	BP
GO:0046620	regulation of organ growth	2/28	102/18614	0.0102435	0.06404	0.0361715	PTEN/FXN	2	BP
GO:0048144	fibroblast proliferation	2/28	103/18614	0.0104367	0.0646237	0.0365012	EGFR/CTNNB1	2	BP
GO:1903076	regulation of protein localization to plasma membrane	2/28	103/18614	0.0104367	0.0646237	0.0365012	EGFR/APPL1	2	BP
GO:0048872	homeostasis of number of cells	3/28	304/18614	0.0104468	0.0646237	0.0365012	FOXO3/HMOX1/SLC25A5	3	BP
GO:0043588	skin development	3/28	308/18614	0.0108227	0.0662834	0.0374386	EGFR/TP63/CTNNB1	3	BP
GO:0006672	ceramide metabolic process	2/28	105/18614	0.0108279	0.0662834	0.0374386	SGPL1/GLA	2	BP
GO:0032760	positive regulation of tumor necrosis factor production	2/28	105/18614	0.0108279	0.0662834	0.0374386	RIPK2/HSPB1	2	BP
GO:0042742	defense response to bacterium	3/28	314/18614	0.0114012	0.0692285	0.0391021	RIPK2/S100A8/S100A9	3	BP
GO:0033138	positive regulation of peptidyl-serine phosphorylation	2/28	108/18614	0.0114268	0.0692285	0.0391021	EGFR/RIPK2	2	BP
GO:0090398	cellular senescence	2/28	108/18614	0.0114268	0.0692285	0.0391021	PTEN/TP63	2	BP
GO:0070372	regulation of ERK1 and ERK2 cascade	3/28	315/18614	0.0114993	0.0694291	0.0392154	EGFR/RIPK2/PTEN	3	BP
GO:0036503	ERAD pathway	2/28	109/18614	0.0116297	0.0697384	0.0393901	BRSK2/UBQLN2	2	BP
GO:1903557	positive regulation of tumor necrosis factor superfamily cytokine production	2/28	109/18614	0.0116297	0.0697384	0.0393901	RIPK2/HSPB1	2	BP
GO:0010717	regulation of epithelial to mesenchymal transition	2/28	110/18614	0.0118341	0.0704848	0.0398117	PTEN/CTNNB1	2	BP
GO:0090263	positive regulation of canonical Wnt signaling pathway	2/28	110/18614	0.0118341	0.0704848	0.0398117	EGFR/DAPK3	2	BP
GO:1902105	regulation of leukocyte differentiation	3/28	319/18614	0.0118968	0.0706195	0.0398878	FOXO3/RIPK2/CTNNB1	3	BP
GO:0008637	apoptotic mitochondrial changes	2/28	111/18614	0.0120401	0.0709923	0.0400983	FXN/SLC25A5	2	BP
GO:2000060	positive regulation of ubiquitin-dependent protein catabolic process	2/28	111/18614	0.0120401	0.0709923	0.0400983	UBQLN2/PTEN	2	BP
GO:0014066	regulation of phosphatidylinositol 3-kinase signaling	2/28	112/18614	0.0122477	0.0714989	0.0403845	EGFR/PTEN	2	BP
GO:0032611	interleukin-1 beta production	2/28	112/18614	0.0122477	0.0714989	0.0403845	RIPK2/HSPB1	2	BP
GO:0032651	regulation of interleukin-1 beta production	2/28	112/18614	0.0122477	0.0714989	0.0403845	RIPK2/HSPB1	2	BP
GO:0031532	actin cytoskeleton reorganization	2/28	114/18614	0.0126676	0.0737062	0.0416312	BRSK2/DAPK3	2	BP
GO:0048638	regulation of developmental growth	3/28	328/18614	0.01282	0.0742068	0.041914	SGPL1/PTEN/FXN	3	BP
GO:0021761	limbic system development	2/28	115/18614	0.0128799	0.0742068	0.041914	PTEN/CTNNB1	2	BP
GO:0048259	regulation of receptor-mediated endocytosis	2/28	115/18614	0.0128799	0.0742068	0.041914	UBQLN2/RAC1	2	BP
GO:0016042	lipid catabolic process	3/28	330/18614	0.0130306	0.0747065	0.0421962	SGPL1/PAFAH1B2/GLA	3	BP
GO:0045582	positive regulation of T cell differentiation	2/28	116/18614	0.0130938	0.0747065	0.0421962	FOXO3/RIPK2	2	BP
GO:0048640	negative regulation of developmental growth	2/28	116/18614	0.0130938	0.0747065	0.0421962	PTEN/FXN	2	BP
GO:0002065	columnar/cuboidal epithelial cell differentiation	2/28	118/18614	0.0135262	0.0763691	0.0431353	TP63/CTNNB1	2	BP
GO:0002718	regulation of cytokine production involved in immune response	2/28	119/18614	0.0137447	0.0763691	0.0431353	RIPK2/HMOX1	2	BP
GO:0009895	negative regulation of catabolic process	3/28	337/18614	0.0137835	0.0763691	0.0431353	SEC22B/EGFR/HMOX1	3	BP
GO:0030111	regulation of Wnt signaling pathway	3/28	338/18614	0.013893	0.0763691	0.0431353	EGFR/DAPK3/CTNNB1	3	BP
GO:0030326	embryonic limb morphogenesis	2/28	120/18614	0.0139647	0.0763691	0.0431353	TP63/CTNNB1	2	BP
GO:0035113	embryonic appendage morphogenesis	2/28	120/18614	0.0139647	0.0763691	0.0431353	TP63/CTNNB1	2	BP
GO:0051101	regulation of DNA binding	2/28	120/18614	0.0139647	0.0763691	0.0431353	HMOX1/CTNNB1	2	BP
GO:0002367	cytokine production involved in immune response	2/28	121/18614	0.0141863	0.0763691	0.0431353	RIPK2/HMOX1	2	BP
GO:0031398	positive regulation of protein ubiquitination	2/28	121/18614	0.0141863	0.0763691	0.0431353	RIPK2/PTEN	2	BP
GO:0043500	muscle adaptation	2/28	121/18614	0.0141863	0.0763691	0.0431353	FOXO3/HMOX1	2	BP
GO:0072089	stem cell proliferation	2/28	121/18614	0.0141863	0.0763691	0.0431353	TP63/CTNNB1	2	BP
GO:1901989	positive regulation of cell cycle phase transition	2/28	121/18614	0.0141863	0.0763691	0.0431353	EGFR/CCND1	2	BP
GO:0070371	ERK1 and ERK2 cascade	3/28	341/18614	0.0142247	0.0763691	0.0431353	EGFR/RIPK2/PTEN	3	BP
GO:0002698	negative regulation of immune effector process	2/28	122/18614	0.0144095	0.0763691	0.0431353	HMOX1/APPL1	2	BP
GO:0046660	female sex differentiation	2/28	122/18614	0.0144095	0.0763691	0.0431353	SGPL1/TP63	2	BP
GO:0022612	gland morphogenesis	2/28	123/18614	0.0146341	0.0763691	0.0431353	EGFR/TP63	2	BP
GO:0032496	response to lipopolysaccharide	3/28	345/18614	0.014674	0.0763691	0.0431353	RIPK2/S100A8/S100A9	3	BP
GO:0007440	foregut morphogenesis	1/28	10/18614	0.0149446	0.0763691	0.0431353	CTNNB1	1	BP
GO:0010764	negative regulation of fibroblast migration	1/28	10/18614	0.0149446	0.0763691	0.0431353	RAC1	1	BP
GO:0015851	nucleobase transport	1/28	10/18614	0.0149446	0.0763691	0.0431353	SLC25A5	1	BP
GO:0033007	negative regulation of mast cell activation involved in immune response	1/28	10/18614	0.0149446	0.0763691	0.0431353	HMOX1	1	BP
GO:0033197	response to vitamin E	1/28	10/18614	0.0149446	0.0763691	0.0431353	CCND1	1	BP
GO:0043587	tongue morphogenesis	1/28	10/18614	0.0149446	0.0763691	0.0431353	CTNNB1	1	BP
GO:0044351	macropinocytosis	1/28	10/18614	0.0149446	0.0763691	0.0431353	APPL1	1	BP
GO:0045625	regulation of T-helper 1 cell differentiation	1/28	10/18614	0.0149446	0.0763691	0.0431353	RIPK2	1	BP
GO:0048263	determination of dorsal identity	1/28	10/18614	0.0149446	0.0763691	0.0431353	CTNNB1	1	BP
GO:0048664	neuron fate determination	1/28	10/18614	0.0149446	0.0763691	0.0431353	CTNNB1	1	BP
GO:0060368	regulation of Fc receptor mediated stimulatory signaling pathway	1/28	10/18614	0.0149446	0.0763691	0.0431353	APPL1	1	BP
GO:0060525	prostate glandular acinus development	1/28	10/18614	0.0149446	0.0763691	0.0431353	TP63	1	BP
GO:0060768	regulation of epithelial cell proliferation involved in prostate gland development	1/28	10/18614	0.0149446	0.0763691	0.0431353	CTNNB1	1	BP
GO:0070391	response to lipoteichoic acid	1/28	10/18614	0.0149446	0.0763691	0.0431353	RIPK2	1	BP
GO:0071223	cellular response to lipoteichoic acid	1/28	10/18614	0.0149446	0.0763691	0.0431353	RIPK2	1	BP
GO:0090394	negative regulation of excitatory postsynaptic potential	1/28	10/18614	0.0149446	0.0763691	0.0431353	PTEN	1	BP
GO:0097090	presynaptic membrane organization	1/28	10/18614	0.0149446	0.0763691	0.0431353	PTEN	1	BP
GO:2000271	positive regulation of fibroblast apoptotic process	1/28	10/18614	0.0149446	0.0763691	0.0431353	TP63	1	BP
GO:2000563	positive regulation of CD4-positive, alpha-beta T cell proliferation	1/28	10/18614	0.0149446	0.0763691	0.0431353	RIPK2	1	BP
GO:0045765	regulation of angiogenesis	3/28	349/18614	0.0151313	0.0770999	0.0435481	HMOX1/HSPB1/CTNNB1	3	BP
GO:0021987	cerebral cortex development	2/28	126/18614	0.0153172	0.0772994	0.0436608	EGFR/CTNNB1	2	BP
GO:0045471	response to ethanol	2/28	126/18614	0.0153172	0.0772994	0.0436608	S100A8/CCND1	2	BP
GO:0008286	insulin receptor signaling pathway	2/28	128/18614	0.0157802	0.0772994	0.0436608	APPL1/CTSD	2	BP
GO:1904375	regulation of protein localization to cell periphery	2/28	128/18614	0.0157802	0.0772994	0.0436608	EGFR/APPL1	2	BP
GO:1901342	regulation of vasculature development	3/28	355/18614	0.0158325	0.0772994	0.0436608	HMOX1/HSPB1/CTNNB1	3	BP
GO:0045931	positive regulation of mitotic cell cycle	2/28	129/18614	0.0160139	0.0772994	0.0436608	EGFR/CCND1	2	BP
GO:2000027	regulation of animal organ morphogenesis	2/28	129/18614	0.0160139	0.0772994	0.0436608	RAC1/CTNNB1	2	BP
GO:0030218	erythrocyte differentiation	2/28	130/18614	0.0162491	0.0772994	0.0436608	FOXO3/SLC25A5	2	BP
GO:0045621	positive regulation of lymphocyte differentiation	2/28	130/18614	0.0162491	0.0772994	0.0436608	FOXO3/RIPK2	2	BP
GO:0003263	cardioblast proliferation	1/28	11/18614	0.0164272	0.0772994	0.0436608	CTNNB1	1	BP
GO:0003264	regulation of cardioblast proliferation	1/28	11/18614	0.0164272	0.0772994	0.0436608	CTNNB1	1	BP
GO:0014889	muscle atrophy	1/28	11/18614	0.0164272	0.0772994	0.0436608	FOXO3	1	BP
GO:0021781	glial cell fate commitment	1/28	11/18614	0.0164272	0.0772994	0.0436608	CTNNB1	1	BP
GO:0033234	negative regulation of protein sumoylation	1/28	11/18614	0.0164272	0.0772994	0.0436608	CTNNB1	1	BP
GO:0035821	modulation of process of another organism	1/28	11/18614	0.0164272	0.0772994	0.0436608	S100A9	1	BP
GO:0042167	heme catabolic process	1/28	11/18614	0.0164272	0.0772994	0.0436608	HMOX1	1	BP
GO:0044571	[2Fe-2S] cluster assembly	1/28	11/18614	0.0164272	0.0772994	0.0436608	FXN	1	BP
GO:0044848	biological phase	1/28	11/18614	0.0164272	0.0772994	0.0436608	CTNNB1	1	BP
GO:0046149	pigment catabolic process	1/28	11/18614	0.0164272	0.0772994	0.0436608	HMOX1	1	BP
GO:0048262	determination of dorsal/ventral asymmetry	1/28	11/18614	0.0164272	0.0772994	0.0436608	CTNNB1	1	BP
GO:0060272	embryonic skeletal joint morphogenesis	1/28	11/18614	0.0164272	0.0772994	0.0436608	CTNNB1	1	BP
GO:0060439	trachea morphogenesis	1/28	11/18614	0.0164272	0.0772994	0.0436608	CTNNB1	1	BP
GO:0060601	lateral sprouting from an epithelium	1/28	11/18614	0.0164272	0.0772994	0.0436608	TP63	1	BP
GO:0060767	epithelial cell proliferation involved in prostate gland development	1/28	11/18614	0.0164272	0.0772994	0.0436608	CTNNB1	1	BP
GO:0070601	centromeric sister chromatid cohesion	1/28	11/18614	0.0164272	0.0772994	0.0436608	CTNNB1	1	BP
GO:0070673	response to interleukin-18	1/28	11/18614	0.0164272	0.0772994	0.0436608	RIPK2	1	BP
GO:1901856	negative regulation of cellular respiration	1/28	11/18614	0.0164272	0.0772994	0.0436608	TRAP1	1	BP
GO:1905383	protein localization to presynapse	1/28	11/18614	0.0164272	0.0772994	0.0436608	HSPB1	1	BP
GO:0032612	interleukin-1 production	2/28	131/18614	0.0164859	0.0772994	0.0436608	RIPK2/HSPB1	2	BP
GO:0032652	regulation of interleukin-1 production	2/28	131/18614	0.0164859	0.0772994	0.0436608	RIPK2/HSPB1	2	BP
GO:0042176	regulation of protein catabolic process	3/28	361/18614	0.0165519	0.0774032	0.0437194	SEC22B/UBQLN2/EGFR	3	BP
GO:0010639	negative regulation of organelle organization	3/28	362/18614	0.0166736	0.0775079	0.0437785	SEC22B/FXN/SLC25A5	3	BP
GO:0002237	response to molecule of bacterial origin	3/28	366/18614	0.0171654	0.0775079	0.0437785	RIPK2/S100A8/S100A9	3	BP
GO:0045860	positive regulation of protein kinase activity	3/28	366/18614	0.0171654	0.0775079	0.0437785	EGFR/CAMKK2/CCND1	3	BP
GO:0042476	odontogenesis	2/28	135/18614	0.0174475	0.0775079	0.0437785	TP63/CTNNB1	2	BP
GO:0051098	regulation of binding	3/28	369/18614	0.0175396	0.0775079	0.0437785	RIPK2/HMOX1/CTNNB1	3	BP
GO:0071900	regulation of protein serine/threonine kinase activity	3/28	369/18614	0.0175396	0.0775079	0.0437785	EGFR/PTEN/CCND1	3	BP
GO:0018108	peptidyl-tyrosine phosphorylation	3/28	370/18614	0.0176653	0.0775079	0.0437785	EGFR/RIPK2/CAMKK2	3	BP
GO:0000086	G2/M transition of mitotic cell cycle	2/28	136/18614	0.0176916	0.0775079	0.0437785	BRSK2/CCND1	2	BP
GO:0001553	luteinization	1/28	12/18614	0.0179076	0.0775079	0.0437785	SGPL1	1	BP
GO:0002887	negative regulation of myeloid leukocyte mediated immunity	1/28	12/18614	0.0179076	0.0775079	0.0437785	HMOX1	1	BP
GO:0003306	Wnt signaling pathway involved in heart development	1/28	12/18614	0.0179076	0.0775079	0.0437785	CTNNB1	1	BP
GO:0003337	mesenchymal to epithelial transition involved in metanephros morphogenesis	1/28	12/18614	0.0179076	0.0775079	0.0437785	CTNNB1	1	BP
GO:0009950	dorsal/ventral axis specification	1/28	12/18614	0.0179076	0.0775079	0.0437785	CTNNB1	1	BP
GO:0010749	regulation of nitric oxide mediated signal transduction	1/28	12/18614	0.0179076	0.0775079	0.0437785	EGFR	1	BP
GO:0015866	ADP transport	1/28	12/18614	0.0179076	0.0775079	0.0437785	SLC25A5	1	BP
GO:0033083	regulation of immature T cell proliferation	1/28	12/18614	0.0179076	0.0775079	0.0437785	RIPK2	1	BP
GO:0033084	regulation of immature T cell proliferation in thymus	1/28	12/18614	0.0179076	0.0775079	0.0437785	RIPK2	1	BP
GO:0040015	negative regulation of multicellular organism growth	1/28	12/18614	0.0179076	0.0775079	0.0437785	FXN	1	BP
GO:0043589	skin morphogenesis	1/28	12/18614	0.0179076	0.0775079	0.0437785	TP63	1	BP
GO:0048548	regulation of pinocytosis	1/28	12/18614	0.0179076	0.0775079	0.0437785	APPL1	1	BP
GO:0051001	negative regulation of nitric-oxide synthase activity	1/28	12/18614	0.0179076	0.0775079	0.0437785	GLA	1	BP
GO:0060134	prepulse inhibition	1/28	12/18614	0.0179076	0.0775079	0.0437785	PTEN	1	BP
GO:0060788	ectodermal placode formation	1/28	12/18614	0.0179076	0.0775079	0.0437785	CTNNB1	1	BP
GO:0071257	cellular response to electrical stimulus	1/28	12/18614	0.0179076	0.0775079	0.0437785	PTEN	1	BP
GO:0071697	ectodermal placode morphogenesis	1/28	12/18614	0.0179076	0.0775079	0.0437785	CTNNB1	1	BP
GO:0072182	regulation of nephron tubule epithelial cell differentiation	1/28	12/18614	0.0179076	0.0775079	0.0437785	CTNNB1	1	BP
GO:0072497	mesenchymal stem cell differentiation	1/28	12/18614	0.0179076	0.0775079	0.0437785	CTNNB1	1	BP
GO:1904672	regulation of somatic stem cell population maintenance	1/28	12/18614	0.0179076	0.0775079	0.0437785	TP63	1	BP
GO:1904953	Wnt signaling pathway involved in midbrain dopaminergic neuron differentiation	1/28	12/18614	0.0179076	0.0775079	0.0437785	CTNNB1	1	BP
GO:0018212	peptidyl-tyrosine modification	3/28	372/18614	0.0179183	0.0775079	0.0437785	EGFR/RIPK2/CAMKK2	3	BP
GO:1903052	positive regulation of proteolysis involved in protein catabolic process	2/28	137/18614	0.0179372	0.0775079	0.0437785	UBQLN2/PTEN	2	BP
GO:0008360	regulation of cell shape	2/28	138/18614	0.0181842	0.0783831	0.0442729	RAC1/DAPK3	2	BP
GO:0008544	epidermis development	3/28	375/18614	0.0183017	0.0785059	0.0443422	EGFR/TP63/CTNNB1	3	BP
GO:1901653	cellular response to peptide	3/28	375/18614	0.0183017	0.0785059	0.0443422	RIPK2/APPL1/CTSD	3	BP
GO:0046328	regulation of JNK cascade	2/28	139/18614	0.0184326	0.0786846	0.0444432	EGFR/RIPK2	2	BP
GO:1903322	positive regulation of protein modification by small protein conjugation or removal	2/28	139/18614	0.0184326	0.0786846	0.0444432	RIPK2/PTEN	2	BP
GO:0050863	regulation of T cell activation	3/28	377/18614	0.0185599	0.0789313	0.0445825	FOXO3/RIPK2/CTNNB1	3	BP
GO:1903008	organelle disassembly	2/28	140/18614	0.0186826	0.0789313	0.0445825	CAMKK2/SLC25A5	2	BP
GO:0001889	liver development	2/28	142/18614	0.0191867	0.0789313	0.0445825	HMOX1/CCND1	2	BP
GO:0006986	response to unfolded protein	2/28	142/18614	0.0191867	0.0789313	0.0445825	HSPB1/CCND1	2	BP
GO:0006787	porphyrin-containing compound catabolic process	1/28	13/18614	0.0193858	0.0789313	0.0445825	HMOX1	1	BP
GO:0032494	response to peptidoglycan	1/28	13/18614	0.0193858	0.0789313	0.0445825	RIPK2	1	BP
GO:0033015	tetrapyrrole catabolic process	1/28	13/18614	0.0193858	0.0789313	0.0445825	HMOX1	1	BP
GO:0033079	immature T cell proliferation	1/28	13/18614	0.0193858	0.0789313	0.0445825	RIPK2	1	BP
GO:0033080	immature T cell proliferation in thymus	1/28	13/18614	0.0193858	0.0789313	0.0445825	RIPK2	1	BP
GO:0034333	adherens junction assembly	1/28	13/18614	0.0193858	0.0789313	0.0445825	CTNNB1	1	BP
GO:0036462	TRAIL-activated apoptotic signaling pathway	1/28	13/18614	0.0193858	0.0789313	0.0445825	PTEN	1	BP
GO:0045605	negative regulation of epidermal cell differentiation	1/28	13/18614	0.0193858	0.0789313	0.0445825	TP63	1	BP
GO:0045683	negative regulation of epidermis development	1/28	13/18614	0.0193858	0.0789313	0.0445825	TP63	1	BP
GO:0048012	hepatocyte growth factor receptor signaling pathway	1/28	13/18614	0.0193858	0.0789313	0.0445825	RAC1	1	BP
GO:0048853	forebrain morphogenesis	1/28	13/18614	0.0193858	0.0789313	0.0445825	PTEN	1	BP
GO:0061000	negative regulation of dendritic spine development	1/28	13/18614	0.0193858	0.0789313	0.0445825	PTEN	1	BP
GO:0071696	ectodermal placode development	1/28	13/18614	0.0193858	0.0789313	0.0445825	CTNNB1	1	BP
GO:0098792	xenophagy	1/28	13/18614	0.0193858	0.0789313	0.0445825	RIPK2	1	BP
GO:1901298	regulation of hydrogen peroxide-mediated programmed cell death	1/28	13/18614	0.0193858	0.0789313	0.0445825	TRAP1	1	BP
GO:1901524	regulation of mitophagy	1/28	13/18614	0.0193858	0.0789313	0.0445825	SLC25A5	1	BP
GO:0050921	positive regulation of chemotaxis	2/28	143/18614	0.0194409	0.0789478	0.0445918	RAC1/HSPB1	2	BP
GO:0002697	regulation of immune effector process	3/28	384/18614	0.0194795	0.0789478	0.0445918	RIPK2/HMOX1/APPL1	3	BP
GO:0008584	male gonad development	2/28	144/18614	0.0196966	0.079096	0.0446755	SGPL1/CCND1	2	BP
GO:0014065	phosphatidylinositol 3-kinase signaling	2/28	144/18614	0.0196966	0.079096	0.0446755	EGFR/PTEN	2	BP
GO:0042552	myelination	2/28	144/18614	0.0196966	0.079096	0.0446755	PTEN/CTNNB1	2	BP
GO:0035264	multicellular organism growth	2/28	145/18614	0.0199537	0.079096	0.0446755	SGPL1/FXN	2	BP
GO:0046546	development of primary male sexual characteristics	2/28	145/18614	0.0199537	0.079096	0.0446755	SGPL1/CCND1	2	BP
GO:0061008	hepaticobiliary system development	2/28	145/18614	0.0199537	0.079096	0.0446755	HMOX1/CCND1	2	BP
GO:0007272	ensheathment of neurons	2/28	146/18614	0.0202122	0.079096	0.0446755	PTEN/CTNNB1	2	BP
GO:0008366	axon ensheathment	2/28	146/18614	0.0202122	0.079096	0.0446755	PTEN/CTNNB1	2	BP
GO:0030177	positive regulation of Wnt signaling pathway	2/28	146/18614	0.0202122	0.079096	0.0446755	EGFR/DAPK3	2	BP
GO:0035107	appendage morphogenesis	2/28	146/18614	0.0202122	0.079096	0.0446755	TP63/CTNNB1	2	BP
GO:0035108	limb morphogenesis	2/28	146/18614	0.0202122	0.079096	0.0446755	TP63/CTNNB1	2	BP
GO:0045667	regulation of osteoblast differentiation	2/28	147/18614	0.0204721	0.079096	0.0446755	TP63/CTNNB1	2	BP
GO:0014744	positive regulation of muscle adaptation	1/28	14/18614	0.020862	0.079096	0.0446755	FOXO3	1	BP
GO:0021819	layer formation in cerebral cortex	1/28	14/18614	0.020862	0.079096	0.0446755	CTNNB1	1	BP
GO:0033004	negative regulation of mast cell activation	1/28	14/18614	0.020862	0.079096	0.0446755	HMOX1	1	BP
GO:0042762	regulation of sulfur metabolic process	1/28	14/18614	0.020862	0.079096	0.0446755	CTNNB1	1	BP
GO:0043301	negative regulation of leukocyte degranulation	1/28	14/18614	0.020862	0.079096	0.0446755	HMOX1	1	BP
GO:0046479	glycosphingolipid catabolic process	1/28	14/18614	0.020862	0.079096	0.0446755	GLA	1	BP
GO:0048715	negative regulation of oligodendrocyte differentiation	1/28	14/18614	0.020862	0.079096	0.0446755	CTNNB1	1	BP
GO:0051547	regulation of keratinocyte migration	1/28	14/18614	0.020862	0.079096	0.0446755	PTEN	1	BP
GO:0061029	eyelid development in camera-type eye	1/28	14/18614	0.020862	0.079096	0.0446755	EGFR	1	BP
GO:0072160	nephron tubule epithelial cell differentiation	1/28	14/18614	0.020862	0.079096	0.0446755	CTNNB1	1	BP
GO:0098840	protein transport along microtubule	1/28	14/18614	0.020862	0.079096	0.0446755	HSPB1	1	BP
GO:0099118	microtubule-based protein transport	1/28	14/18614	0.020862	0.079096	0.0446755	HSPB1	1	BP
GO:1901029	negative regulation of mitochondrial outer membrane permeabilization involved in apoptotic signaling pathway	1/28	14/18614	0.020862	0.079096	0.0446755	SLC25A5	1	BP
GO:1902043	positive regulation of extrinsic apoptotic signaling pathway via death domain receptors	1/28	14/18614	0.020862	0.079096	0.0446755	PTEN	1	BP
GO:1904152	regulation of retrograde protein transport, ER to cytosol	1/28	14/18614	0.020862	0.079096	0.0446755	BRSK2	1	BP
GO:1904294	positive regulation of ERAD pathway	1/28	14/18614	0.020862	0.079096	0.0446755	UBQLN2	1	BP
GO:1904668	positive regulation of ubiquitin protein ligase activity	1/28	14/18614	0.020862	0.079096	0.0446755	PTEN	1	BP
GO:2000288	positive regulation of myoblast proliferation	1/28	14/18614	0.020862	0.079096	0.0446755	CTNNB1	1	BP
GO:0030900	forebrain development	3/28	397/18614	0.021254	0.079552	0.0449331	EGFR/PTEN/CTNNB1	3	BP
GO:0050768	negative regulation of neurogenesis	2/28	150/18614	0.0212603	0.079552	0.0449331	PTEN/CTNNB1	2	BP
GO:2000377	regulation of reactive oxygen species metabolic process	2/28	150/18614	0.0212603	0.079552	0.0449331	RAC1/TRAP1	2	BP
GO:0044839	cell cycle G2/M phase transition	2/28	151/18614	0.0215259	0.079552	0.0449331	BRSK2/CCND1	2	BP
GO:0016331	morphogenesis of embryonic epithelium	2/28	152/18614	0.0217928	0.079552	0.0449331	TP63/CTNNB1	2	BP
GO:0043535	regulation of blood vessel endothelial cell migration	2/28	152/18614	0.0217928	0.079552	0.0449331	HMOX1/HSPB1	2	BP
GO:0045786	negative regulation of cell cycle	3/28	404/18614	0.0222455	0.079552	0.0449331	PTEN/CCND1/CTNNB1	3	BP
GO:0009411	response to UV	2/28	154/18614	0.0223309	0.079552	0.0449331	EGFR/CCND1	2	BP
GO:0050729	positive regulation of inflammatory response	2/28	154/18614	0.0223309	0.079552	0.0449331	S100A8/S100A9	2	BP
GO:0001711	endodermal cell fate commitment	1/28	15/18614	0.0223359	0.079552	0.0449331	CTNNB1	1	BP
GO:0002031	G protein-coupled receptor internalization	1/28	15/18614	0.0223359	0.079552	0.0449331	UBQLN2	1	BP
GO:0003376	sphingosine-1-phosphate receptor signaling pathway	1/28	15/18614	0.0223359	0.079552	0.0449331	RAC1	1	BP
GO:0010421	hydrogen peroxide-mediated programmed cell death	1/28	15/18614	0.0223359	0.079552	0.0449331	TRAP1	1	BP
GO:0010457	centriole-centriole cohesion	1/28	15/18614	0.0223359	0.079552	0.0449331	CTNNB1	1	BP
GO:0010838	positive regulation of keratinocyte proliferation	1/28	15/18614	0.0223359	0.079552	0.0449331	TP63	1	BP
GO:0015867	ATP transport	1/28	15/18614	0.0223359	0.079552	0.0449331	SLC25A5	1	BP
GO:0033147	negative regulation of intracellular estrogen receptor signaling pathway	1/28	15/18614	0.0223359	0.079552	0.0449331	TP63	1	BP
GO:0033599	regulation of mammary gland epithelial cell proliferation	1/28	15/18614	0.0223359	0.079552	0.0449331	CCND1	1	BP
GO:0043455	regulation of secondary metabolic process	1/28	15/18614	0.0223359	0.079552	0.0449331	APPL1	1	BP
GO:0043652	engulfment of apoptotic cell	1/28	15/18614	0.0223359	0.079552	0.0449331	RAC1	1	BP
GO:0045475	locomotor rhythm	1/28	15/18614	0.0223359	0.079552	0.0449331	PTEN	1	BP
GO:0048021	regulation of melanin biosynthetic process	1/28	15/18614	0.0223359	0.079552	0.0449331	APPL1	1	BP
GO:0048820	hair follicle maturation	1/28	15/18614	0.0223359	0.079552	0.0449331	CTNNB1	1	BP
GO:0072283	metanephric renal vesicle morphogenesis	1/28	15/18614	0.0223359	0.079552	0.0449331	CTNNB1	1	BP
GO:0072498	embryonic skeletal joint development	1/28	15/18614	0.0223359	0.079552	0.0449331	CTNNB1	1	BP
GO:1900376	regulation of secondary metabolite biosynthetic process	1/28	15/18614	0.0223359	0.079552	0.0449331	APPL1	1	BP
GO:1901142	insulin metabolic process	1/28	15/18614	0.0223359	0.079552	0.0449331	CTSD	1	BP
GO:1902902	negative regulation of autophagosome assembly	1/28	15/18614	0.0223359	0.079552	0.0449331	SEC22B	1	BP
GO:1905208	negative regulation of cardiocyte differentiation	1/28	15/18614	0.0223359	0.079552	0.0449331	EGFR	1	BP
GO:2001028	positive regulation of endothelial cell chemotaxis	1/28	15/18614	0.0223359	0.079552	0.0449331	HSPB1	1	BP
GO:0043524	negative regulation of neuron apoptotic process	2/28	155/18614	0.0226019	0.0801755	0.0452853	HMOX1/CCND1	2	BP
GO:0050770	regulation of axonogenesis	2/28	155/18614	0.0226019	0.0801755	0.0452853	BRSK2/PTEN	2	BP
GO:0007584	response to nutrient	2/28	156/18614	0.0228744	0.0806552	0.0455562	HMOX1/CCND1	2	BP
GO:0051961	negative regulation of nervous system development	2/28	156/18614	0.0228744	0.0806552	0.0455562	PTEN/CTNNB1	2	BP
GO:2001236	regulation of extrinsic apoptotic signaling pathway	2/28	156/18614	0.0228744	0.0806552	0.0455562	PTEN/HMOX1	2	BP
GO:0050905	neuromuscular process	2/28	157/18614	0.0231483	0.0814578	0.0460096	PTEN/FXN	2	BP
GO:0006825	copper ion transport	1/28	16/18614	0.0238078	0.0827864	0.04676	CP	1	BP
GO:0034134	toll-like receptor 2 signaling pathway	1/28	16/18614	0.0238078	0.0827864	0.04676	RIPK2	1	BP
GO:0042159	lipoprotein catabolic process	1/28	16/18614	0.0238078	0.0827864	0.04676	CTSD	1	BP
GO:0070431	nucleotide-binding oligomerization domain containing 2 signaling pathway	1/28	16/18614	0.0238078	0.0827864	0.04676	RIPK2	1	BP
GO:0097468	programmed cell death in response to reactive oxygen species	1/28	16/18614	0.0238078	0.0827864	0.04676	TRAP1	1	BP
GO:2000696	regulation of epithelial cell differentiation involved in kidney development	1/28	16/18614	0.0238078	0.0827864	0.04676	CTNNB1	1	BP
GO:1903706	regulation of hemopoiesis	3/28	415/18614	0.0238545	0.0827864	0.04676	FOXO3/RIPK2/CTNNB1	3	BP
GO:0006665	sphingolipid metabolic process	2/28	160/18614	0.023978	0.0830514	0.0469096	SGPL1/GLA	2	BP
GO:0030099	myeloid cell differentiation	3/28	421/18614	0.0247584	0.0844018	0.0476724	FOXO3/SLC25A5/CTNNB1	3	BP
GO:0035966	response to topologically incorrect protein	2/28	164/18614	0.0251032	0.0844018	0.0476724	HSPB1/CCND1	2	BP
GO:0140053	mitochondrial gene expression	2/28	164/18614	0.0251032	0.0844018	0.0476724	FOXO3/DAP3	2	BP
GO:0002091	negative regulation of receptor internalization	1/28	17/18614	0.0252775	0.0844018	0.0476724	UBQLN2	1	BP
GO:0006677	glycosylceramide metabolic process	1/28	17/18614	0.0252775	0.0844018	0.0476724	GLA	1	BP
GO:0014067	negative regulation of phosphatidylinositol 3-kinase signaling	1/28	17/18614	0.0252775	0.0844018	0.0476724	PTEN	1	BP
GO:0019377	glycolipid catabolic process	1/28	17/18614	0.0252775	0.0844018	0.0476724	GLA	1	BP
GO:0021542	dentate gyrus development	1/28	17/18614	0.0252775	0.0844018	0.0476724	PTEN	1	BP
GO:0035729	cellular response to hepatocyte growth factor stimulus	1/28	17/18614	0.0252775	0.0844018	0.0476724	APPL1	1	BP
GO:0045019	negative regulation of nitric oxide biosynthetic process	1/28	17/18614	0.0252775	0.0844018	0.0476724	GLA	1	BP
GO:0046838	phosphorylated carbohydrate dephosphorylation	1/28	17/18614	0.0252775	0.0844018	0.0476724	PTEN	1	BP
GO:0046855	inositol phosphate dephosphorylation	1/28	17/18614	0.0252775	0.0844018	0.0476724	PTEN	1	BP
GO:0051412	response to corticosterone	1/28	17/18614	0.0252775	0.0844018	0.0476724	CCND1	1	BP
GO:0051895	negative regulation of focal adhesion assembly	1/28	17/18614	0.0252775	0.0844018	0.0476724	PTEN	1	BP
GO:0061548	ganglion development	1/28	17/18614	0.0252775	0.0844018	0.0476724	CTNNB1	1	BP
GO:0150118	negative regulation of cell-substrate junction organization	1/28	17/18614	0.0252775	0.0844018	0.0476724	PTEN	1	BP
GO:1904406	negative regulation of nitric oxide metabolic process	1/28	17/18614	0.0252775	0.0844018	0.0476724	GLA	1	BP
GO:1904948	midbrain dopaminergic neuron differentiation	1/28	17/18614	0.0252775	0.0844018	0.0476724	CTNNB1	1	BP
GO:1990403	embryonic brain development	1/28	17/18614	0.0252775	0.0844018	0.0476724	CTNNB1	1	BP
GO:0007409	axonogenesis	3/28	427/18614	0.0256809	0.0855869	0.0483418	BRSK2/RAC1/PTEN	3	BP
GO:0001503	ossification	3/28	429/18614	0.0259926	0.0863194	0.0487555	EGFR/TP63/CTNNB1	3	BP
GO:0033674	positive regulation of kinase activity	3/28	430/18614	0.0261491	0.0863194	0.0487555	EGFR/CAMKK2/CCND1	3	BP
GO:0010720	positive regulation of cell development	3/28	432/18614	0.0264638	0.0863194	0.0487555	FOXO3/RIPK2/CTNNB1	3	BP
GO:0002827	positive regulation of T-helper 1 type immune response	1/28	18/18614	0.026745	0.0863194	0.0487555	RIPK2	1	BP
GO:0003159	morphogenesis of an endothelium	1/28	18/18614	0.026745	0.0863194	0.0487555	CTNNB1	1	BP
GO:0007063	regulation of sister chromatid cohesion	1/28	18/18614	0.026745	0.0863194	0.0487555	CTNNB1	1	BP
GO:0032769	negative regulation of monooxygenase activity	1/28	18/18614	0.026745	0.0863194	0.0487555	GLA	1	BP
GO:0038128	ERBB2 signaling pathway	1/28	18/18614	0.026745	0.0863194	0.0487555	EGFR	1	BP
GO:0043217	myelin maintenance	1/28	18/18614	0.026745	0.0863194	0.0487555	PTEN	1	BP
GO:0050884	neuromuscular process controlling posture	1/28	18/18614	0.026745	0.0863194	0.0487555	FXN	1	BP
GO:0060263	regulation of respiratory burst	1/28	18/18614	0.026745	0.0863194	0.0487555	RAC1	1	BP
GO:0061154	endothelial tube morphogenesis	1/28	18/18614	0.026745	0.0863194	0.0487555	CTNNB1	1	BP
GO:0072077	renal vesicle morphogenesis	1/28	18/18614	0.026745	0.0863194	0.0487555	CTNNB1	1	BP
GO:0090520	sphingolipid mediated signaling pathway	1/28	18/18614	0.026745	0.0863194	0.0487555	RAC1	1	BP
GO:0090594	inflammatory response to wounding	1/28	18/18614	0.026745	0.0863194	0.0487555	HMOX1	1	BP
GO:2000136	regulation of cell proliferation involved in heart morphogenesis	1/28	18/18614	0.026745	0.0863194	0.0487555	CTNNB1	1	BP
GO:2000369	regulation of clathrin-dependent endocytosis	1/28	18/18614	0.026745	0.0863194	0.0487555	UBQLN2	1	BP
GO:0007009	plasma membrane organization	2/28	170/18614	0.026831	0.0863194	0.0487555	PTEN/S100A9	2	BP
GO:0007254	JNK cascade	2/28	170/18614	0.026831	0.0863194	0.0487555	EGFR/RIPK2	2	BP
GO:0001837	epithelial to mesenchymal transition	2/28	172/18614	0.0274174	0.0878854	0.04964	PTEN/CTNNB1	2	BP
GO:0048015	phosphatidylinositol-mediated signaling	2/28	172/18614	0.0274174	0.0878854	0.04964	EGFR/PTEN	2	BP
GO:0072331	signal transduction by p53 class mediator	2/28	173/18614	0.0277126	0.0881826	0.0498079	TP63/PHLDA3	2	BP
GO:2000058	regulation of ubiquitin-dependent protein catabolic process	2/28	173/18614	0.0277126	0.0881826	0.0498079	UBQLN2/PTEN	2	BP
GO:0009410	response to xenobiotic stimulus	3/28	440/18614	0.0277433	0.0881826	0.0498079	HMOX1/CCND1/CTNNB1	3	BP
GO:0006390	mitochondrial transcription	1/28	19/18614	0.0282104	0.0881826	0.0498079	FOXO3	1	BP
GO:0030540	female genitalia development	1/28	19/18614	0.0282104	0.0881826	0.0498079	TP63	1	BP
GO:0032026	response to magnesium ion	1/28	19/18614	0.0282104	0.0881826	0.0498079	CCND1	1	BP
GO:0035728	response to hepatocyte growth factor	1/28	19/18614	0.0282104	0.0881826	0.0498079	APPL1	1	BP
GO:0036342	post-anal tail morphogenesis	1/28	19/18614	0.0282104	0.0881826	0.0498079	TP63	1	BP
GO:0045603	positive regulation of endothelial cell differentiation	1/28	19/18614	0.0282104	0.0881826	0.0498079	CTNNB1	1	BP
GO:0060438	trachea development	1/28	19/18614	0.0282104	0.0881826	0.0498079	CTNNB1	1	BP
GO:0061323	cell proliferation involved in heart morphogenesis	1/28	19/18614	0.0282104	0.0881826	0.0498079	CTNNB1	1	BP
GO:0071545	inositol phosphate catabolic process	1/28	19/18614	0.0282104	0.0881826	0.0498079	PTEN	1	BP
GO:0072087	renal vesicle development	1/28	19/18614	0.0282104	0.0881826	0.0498079	CTNNB1	1	BP
GO:0097202	activation of cysteine-type endopeptidase activity	1/28	19/18614	0.0282104	0.0881826	0.0498079	RIPK2	1	BP
GO:1905475	regulation of protein localization to membrane	2/28	175/18614	0.0283069	0.0883276	0.0498898	EGFR/APPL1	2	BP
GO:0001764	neuron migration	2/28	176/18614	0.028606	0.0887893	0.0501506	RAC1/CTNNB1	2	BP
GO:0048017	inositol lipid-mediated signaling	2/28	176/18614	0.028606	0.0887893	0.0501506	EGFR/PTEN	2	BP
GO:0051099	positive regulation of binding	2/28	176/18614	0.028606	0.0887893	0.0501506	RIPK2/CTNNB1	2	BP
GO:0019827	stem cell population maintenance	2/28	177/18614	0.0289063	0.0890914	0.0503212	TP63/CTNNB1	2	BP
GO:0008361	regulation of cell size	2/28	178/18614	0.029208	0.0890914	0.0503212	RAC1/PTEN	2	BP
GO:0043534	blood vessel endothelial cell migration	2/28	179/18614	0.0295109	0.0890914	0.0503212	HMOX1/HSPB1	2	BP
GO:0010310	regulation of hydrogen peroxide metabolic process	1/28	20/18614	0.0296737	0.0890914	0.0503212	RAC1	1	BP
GO:0032495	response to muramyl dipeptide	1/28	20/18614	0.0296737	0.0890914	0.0503212	RIPK2	1	BP
GO:0035795	negative regulation of mitochondrial membrane permeability	1/28	20/18614	0.0296737	0.0890914	0.0503212	SLC25A5	1	BP
GO:0043586	tongue development	1/28	20/18614	0.0296737	0.0890914	0.0503212	CTNNB1	1	BP
GO:0046514	ceramide catabolic process	1/28	20/18614	0.0296737	0.0890914	0.0503212	GLA	1	BP
GO:0048643	positive regulation of skeletal muscle tissue development	1/28	20/18614	0.0296737	0.0890914	0.0503212	CTNNB1	1	BP
GO:0051546	keratinocyte migration	1/28	20/18614	0.0296737	0.0890914	0.0503212	PTEN	1	BP
GO:0060231	mesenchymal to epithelial transition	1/28	20/18614	0.0296737	0.0890914	0.0503212	CTNNB1	1	BP
GO:0060749	mammary gland alveolus development	1/28	20/18614	0.0296737	0.0890914	0.0503212	CCND1	1	BP
GO:0061377	mammary gland lobule development	1/28	20/18614	0.0296737	0.0890914	0.0503212	CCND1	1	BP
GO:0071243	cellular response to arsenic-containing substance	1/28	20/18614	0.0296737	0.0890914	0.0503212	HMOX1	1	BP
GO:0072079	nephron tubule formation	1/28	20/18614	0.0296737	0.0890914	0.0503212	CTNNB1	1	BP
GO:1903427	negative regulation of reactive oxygen species biosynthetic process	1/28	20/18614	0.0296737	0.0890914	0.0503212	TRAP1	1	BP
GO:1904292	regulation of ERAD pathway	1/28	20/18614	0.0296737	0.0890914	0.0503212	UBQLN2	1	BP
GO:2000269	regulation of fibroblast apoptotic process	1/28	20/18614	0.0296737	0.0890914	0.0503212	TP63	1	BP
GO:0003012	muscle system process	3/28	452/18614	0.0297243	0.0890914	0.0503212	FOXO3/HMOX1/DAPK3	3	BP
GO:0010975	regulation of neuron projection development	3/28	452/18614	0.0297243	0.0890914	0.0503212	BRSK2/PTEN/S100A9	3	BP
GO:0035265	organ growth	2/28	180/18614	0.0298151	0.0890914	0.0503212	PTEN/FXN	2	BP
GO:0045580	regulation of T cell differentiation	2/28	180/18614	0.0298151	0.0890914	0.0503212	FOXO3/RIPK2	2	BP
GO:0098727	maintenance of cell number	2/28	181/18614	0.0301205	0.0898519	0.0507507	TP63/CTNNB1	2	BP
GO:0048736	appendage development	2/28	182/18614	0.0304272	0.090281	0.0509931	TP63/CTNNB1	2	BP
GO:0060173	limb development	2/28	182/18614	0.0304272	0.090281	0.0509931	TP63/CTNNB1	2	BP
GO:0042129	regulation of T cell proliferation	2/28	183/18614	0.0307352	0.090281	0.0509931	RIPK2/CTNNB1	2	BP
GO:1902107	positive regulation of leukocyte differentiation	2/28	184/18614	0.0310444	0.090281	0.0509931	FOXO3/RIPK2	2	BP
GO:1903708	positive regulation of hemopoiesis	2/28	184/18614	0.0310444	0.090281	0.0509931	FOXO3/RIPK2	2	BP
GO:0002029	desensitization of G protein-coupled receptor signaling pathway	1/28	21/18614	0.0311349	0.090281	0.0509931	UBQLN2	1	BP
GO:0002089	lens morphogenesis in camera-type eye	1/28	21/18614	0.0311349	0.090281	0.0509931	CTNNB1	1	BP
GO:0007398	ectoderm development	1/28	21/18614	0.0311349	0.090281	0.0509931	CTNNB1	1	BP
GO:0016137	glycoside metabolic process	1/28	21/18614	0.0311349	0.090281	0.0509931	GLA	1	BP
GO:0038083	peptidyl-tyrosine autophosphorylation	1/28	21/18614	0.0311349	0.090281	0.0509931	EGFR	1	BP
GO:0044321	response to leptin	1/28	21/18614	0.0311349	0.090281	0.0509931	CCND1	1	BP
GO:0045063	T-helper 1 cell differentiation	1/28	21/18614	0.0311349	0.090281	0.0509931	RIPK2	1	BP
GO:0050765	negative regulation of phagocytosis	1/28	21/18614	0.0311349	0.090281	0.0509931	APPL1	1	BP
GO:0051571	positive regulation of histone H3-K4 methylation	1/28	21/18614	0.0311349	0.090281	0.0509931	CTNNB1	1	BP
GO:0090201	negative regulation of release of cytochrome c from mitochondria	1/28	21/18614	0.0311349	0.090281	0.0509931	FXN	1	BP
GO:1903204	negative regulation of oxidative stress-induced neuron death	1/28	21/18614	0.0311349	0.090281	0.0509931	CTNNB1	1	BP
GO:1903206	negative regulation of hydrogen peroxide-induced cell death	1/28	21/18614	0.0311349	0.090281	0.0509931	TRAP1	1	BP
GO:0032640	tumor necrosis factor production	2/28	185/18614	0.0313549	0.0903247	0.0510178	RIPK2/HSPB1	2	BP
GO:0032680	regulation of tumor necrosis factor production	2/28	185/18614	0.0313549	0.0903247	0.0510178	RIPK2/HSPB1	2	BP
GO:0045766	positive regulation of angiogenesis	2/28	185/18614	0.0313549	0.0903247	0.0510178	HMOX1/HSPB1	2	BP
GO:1904018	positive regulation of vasculature development	2/28	185/18614	0.0313549	0.0903247	0.0510178	HMOX1/HSPB1	2	BP
GO:0050808	synapse organization	3/28	466/18614	0.032129	0.0919842	0.0519551	PTEN/APPL1/CTNNB1	3	BP
GO:0061138	morphogenesis of a branching epithelium	2/28	188/18614	0.0322938	0.0919842	0.0519551	TP63/CTNNB1	2	BP
GO:0006907	pinocytosis	1/28	22/18614	0.032594	0.0919842	0.0519551	APPL1	1	BP
GO:0022401	negative adaptation of signaling pathway	1/28	22/18614	0.032594	0.0919842	0.0519551	UBQLN2	1	BP
GO:0035313	wound healing, spreading of epidermal cells	1/28	22/18614	0.032594	0.0919842	0.0519551	PTEN	1	BP
GO:0035739	CD4-positive, alpha-beta T cell proliferation	1/28	22/18614	0.032594	0.0919842	0.0519551	RIPK2	1	BP
GO:0045624	positive regulation of T-helper cell differentiation	1/28	22/18614	0.032594	0.0919842	0.0519551	RIPK2	1	BP
GO:0097107	postsynaptic density assembly	1/28	22/18614	0.032594	0.0919842	0.0519551	PTEN	1	BP
GO:1901679	nucleotide transmembrane transport	1/28	22/18614	0.032594	0.0919842	0.0519551	SLC25A5	1	BP
GO:1903589	positive regulation of blood vessel endothelial cell proliferation involved in sprouting angiogenesis	1/28	22/18614	0.032594	0.0919842	0.0519551	HMOX1	1	BP
GO:2000561	regulation of CD4-positive, alpha-beta T cell proliferation	1/28	22/18614	0.032594	0.0919842	0.0519551	RIPK2	1	BP
GO:0002221	pattern recognition receptor signaling pathway	2/28	189/18614	0.0326093	0.0919842	0.0519551	RIPK2/APPL1	2	BP
GO:0002700	regulation of production of molecular mediator of immune response	2/28	189/18614	0.0326093	0.0919842	0.0519551	RIPK2/HMOX1	2	BP
GO:0031099	regeneration	2/28	190/18614	0.0329259	0.0924338	0.0522091	HMOX1/CCND1	2	BP
GO:0071706	tumor necrosis factor superfamily cytokine production	2/28	190/18614	0.0329259	0.0924338	0.0522091	RIPK2/HSPB1	2	BP
GO:1903555	regulation of tumor necrosis factor superfamily cytokine production	2/28	190/18614	0.0329259	0.0924338	0.0522091	RIPK2/HSPB1	2	BP
GO:0009755	hormone-mediated signaling pathway	2/28	192/18614	0.033563	0.0940723	0.0531346	APPL1/TP63	2	BP
GO:0032872	regulation of stress-activated MAPK cascade	2/28	193/18614	0.0338833	0.0943465	0.0532894	EGFR/RIPK2	2	BP
GO:0010560	positive regulation of glycoprotein biosynthetic process	1/28	23/18614	0.0340509	0.0943465	0.0532894	CTNNB1	1	BP
GO:0032727	positive regulation of interferon-alpha production	1/28	23/18614	0.0340509	0.0943465	0.0532894	RIPK2	1	BP
GO:0045591	positive regulation of regulatory T cell differentiation	1/28	23/18614	0.0340509	0.0943465	0.0532894	FOXO3	1	BP
GO:0046716	muscle cell cellular homeostasis	1/28	23/18614	0.0340509	0.0943465	0.0532894	FXN	1	BP
GO:1901032	negative regulation of response to reactive oxygen species	1/28	23/18614	0.0340509	0.0943465	0.0532894	TRAP1	1	BP
GO:1905709	negative regulation of membrane permeability	1/28	23/18614	0.0340509	0.0943465	0.0532894	SLC25A5	1	BP
GO:0031667	response to nutrient levels	3/28	477/18614	0.0340889	0.0943465	0.0532894	FOXO3/HMOX1/CCND1	3	BP
GO:1901991	negative regulation of mitotic cell cycle phase transition	2/28	194/18614	0.0342049	0.0945191	0.0533869	PTEN/CCND1	2	BP
GO:0061564	axon development	3/28	479/18614	0.0344519	0.0949644	0.0536384	BRSK2/RAC1/PTEN	3	BP
GO:0002791	regulation of peptide secretion	2/28	195/18614	0.0345276	0.0949644	0.0536384	BRSK2/S100A8	2	BP
GO:0071902	positive regulation of protein serine/threonine kinase activity	2/28	195/18614	0.0345276	0.0949644	0.0536384	EGFR/CCND1	2	BP
GO:0070302	regulation of stress-activated protein kinase signaling cascade	2/28	196/18614	0.0348516	0.0954217	0.0538967	EGFR/RIPK2	2	BP
GO:0045785	positive regulation of cell adhesion	3/28	482/18614	0.0350002	0.0954217	0.0538967	FOXO3/RAC1/RIPK2	3	BP
GO:0007416	synapse assembly	2/28	197/18614	0.0351768	0.0954217	0.0538967	PTEN/CTNNB1	2	BP
GO:0090087	regulation of peptide transport	2/28	197/18614	0.0351768	0.0954217	0.0538967	BRSK2/S100A8	2	BP
GO:0001759	organ induction	1/28	24/18614	0.0355057	0.0954217	0.0538967	CTNNB1	1	BP
GO:0002053	positive regulation of mesenchymal cell proliferation	1/28	24/18614	0.0355057	0.0954217	0.0538967	CTNNB1	1	BP
GO:0008045	motor neuron axon guidance	1/28	24/18614	0.0355057	0.0954217	0.0538967	RAC1	1	BP
GO:0023058	adaptation of signaling pathway	1/28	24/18614	0.0355057	0.0954217	0.0538967	UBQLN2	1	BP
GO:0030539	male genitalia development	1/28	24/18614	0.0355057	0.0954217	0.0538967	CTNNB1	1	BP
GO:0030859	polarized epithelial cell differentiation	1/28	24/18614	0.0355057	0.0954217	0.0538967	TP63	1	BP
GO:0042438	melanin biosynthetic process	1/28	24/18614	0.0355057	0.0954217	0.0538967	APPL1	1	BP
GO:0060907	positive regulation of macrophage cytokine production	1/28	24/18614	0.0355057	0.0954217	0.0538967	RIPK2	1	BP
GO:0072202	cell differentiation involved in metanephros development	1/28	24/18614	0.0355057	0.0954217	0.0538967	CTNNB1	1	BP
GO:1901863	positive regulation of muscle tissue development	1/28	24/18614	0.0355057	0.0954217	0.0538967	CTNNB1	1	BP
GO:2001026	regulation of endothelial cell chemotaxis	1/28	24/18614	0.0355057	0.0954217	0.0538967	HSPB1	1	BP
GO:0002683	negative regulation of immune system process	3/28	487/18614	0.0359242	0.0963994	0.054449	HMOX1/APPL1/CTNNB1	3	BP
GO:0071248	cellular response to metal ion	2/28	200/18614	0.0361595	0.0968831	0.0547222	EGFR/HMOX1	2	BP
GO:0007626	locomotory behavior	2/28	201/18614	0.0364894	0.0971054	0.0548477	PTEN/FXN	2	BP
GO:0019221	cytokine-mediated signaling pathway	3/28	492/18614	0.036861	0.0971054	0.0548477	FOXO3/RIPK2/APPL1	3	BP
GO:0006582	melanin metabolic process	1/28	25/18614	0.0369584	0.0971054	0.0548477	APPL1	1	BP
GO:0032331	negative regulation of chondrocyte differentiation	1/28	25/18614	0.0369584	0.0971054	0.0548477	CTNNB1	1	BP
GO:0033233	regulation of protein sumoylation	1/28	25/18614	0.0369584	0.0971054	0.0548477	CTNNB1	1	BP
GO:0046628	positive regulation of insulin receptor signaling pathway	1/28	25/18614	0.0369584	0.0971054	0.0548477	CTSD	1	BP
GO:0046641	positive regulation of alpha-beta T cell proliferation	1/28	25/18614	0.0369584	0.0971054	0.0548477	RIPK2	1	BP
GO:0046856	phosphatidylinositol dephosphorylation	1/28	25/18614	0.0369584	0.0971054	0.0548477	PTEN	1	BP
GO:0070423	nucleotide-binding oligomerization domain containing signaling pathway	1/28	25/18614	0.0369584	0.0971054	0.0548477	RIPK2	1	BP
GO:0072273	metanephric nephron morphogenesis	1/28	25/18614	0.0369584	0.0971054	0.0548477	CTNNB1	1	BP
GO:0090023	positive regulation of neutrophil chemotaxis	1/28	25/18614	0.0369584	0.0971054	0.0548477	RAC1	1	BP
GO:2000291	regulation of myoblast proliferation	1/28	25/18614	0.0369584	0.0971054	0.0548477	CTNNB1	1	BP
GO:2000679	positive regulation of transcription regulatory region DNA binding	1/28	25/18614	0.0369584	0.0971054	0.0548477	CTNNB1	1	BP
GO:0001763	morphogenesis of a branching structure	2/28	203/18614	0.0371528	0.0974708	0.0550541	TP63/CTNNB1	2	BP
GO:0043410	positive regulation of MAPK cascade	3/28	495/18614	0.0374292	0.09805	0.0553812	EGFR/RIPK2/CTNNB1	3	BP
GO:0002433	immune response-regulating cell surface receptor signaling pathway involved in phagocytosis	1/28	26/18614	0.038409	0.0981379	0.0554309	APPL1	1	BP
GO:0010259	multicellular organism aging	1/28	26/18614	0.038409	0.0981379	0.0554309	TP63	1	BP
GO:0021854	hypothalamus development	1/28	26/18614	0.038409	0.0981379	0.0554309	CTNNB1	1	BP
GO:0022010	central nervous system myelination	1/28	26/18614	0.038409	0.0981379	0.0554309	PTEN	1	BP
GO:0032291	axon ensheathment in central nervous system	1/28	26/18614	0.038409	0.0981379	0.0554309	PTEN	1	BP
GO:0033598	mammary gland epithelial cell proliferation	1/28	26/18614	0.038409	0.0981379	0.0554309	CCND1	1	BP
GO:0035872	nucleotide-binding domain, leucine rich repeat containing receptor signaling pathway	1/28	26/18614	0.038409	0.0981379	0.0554309	RIPK2	1	BP
GO:0035994	response to muscle stretch	1/28	26/18614	0.038409	0.0981379	0.0554309	CTNNB1	1	BP
GO:0038096	Fc-gamma receptor signaling pathway involved in phagocytosis	1/28	26/18614	0.038409	0.0981379	0.0554309	APPL1	1	BP
GO:0044346	fibroblast apoptotic process	1/28	26/18614	0.038409	0.0981379	0.0554309	TP63	1	BP
GO:0044550	secondary metabolite biosynthetic process	1/28	26/18614	0.038409	0.0981379	0.0554309	APPL1	1	BP
GO:0051894	positive regulation of focal adhesion assembly	1/28	26/18614	0.038409	0.0981379	0.0554309	RAC1	1	BP
GO:0060740	prostate gland epithelium morphogenesis	1/28	26/18614	0.038409	0.0981379	0.0554309	TP63	1	BP
GO:1901028	regulation of mitochondrial outer membrane permeabilization involved in apoptotic signaling pathway	1/28	26/18614	0.038409	0.0981379	0.0554309	SLC25A5	1	BP
GO:1903020	positive regulation of glycoprotein metabolic process	1/28	26/18614	0.038409	0.0981379	0.0554309	CTNNB1	1	BP
GO:1903306	negative regulation of regulated secretory pathway	1/28	26/18614	0.038409	0.0981379	0.0554309	HMOX1	1	BP
GO:2000773	negative regulation of cellular senescence	1/28	26/18614	0.038409	0.0981379	0.0554309	PTEN	1	BP
GO:1902115	regulation of organelle assembly	2/28	207/18614	0.0384937	0.0982118	0.0554727	SEC22B/UBQLN2	2	BP
GO:0006643	membrane lipid metabolic process	2/28	208/18614	0.0388318	0.0989313	0.0558791	SGPL1/GLA	2	BP
GO:0002758	innate immune response-activating signaling pathway	2/28	209/18614	0.0391711	0.0995081	0.0562048	RIPK2/APPL1	2	BP
GO:0045732	positive regulation of protein catabolic process	2/28	209/18614	0.0391711	0.0995081	0.0562048	SEC22B/UBQLN2	2	BP
GO:0032869	cellular response to insulin stimulus	2/28	211/18614	0.0398531	0.0998137	0.0563774	APPL1/CTSD	2	BP
GO:0001964	startle response	1/28	27/18614	0.0398575	0.0998137	0.0563774	PTEN	1	BP
GO:0021801	cerebral cortex radial glia-guided migration	1/28	27/18614	0.0398575	0.0998137	0.0563774	CTNNB1	1	BP
GO:0022030	telencephalon glial cell migration	1/28	27/18614	0.0398575	0.0998137	0.0563774	CTNNB1	1	BP
GO:0034143	regulation of toll-like receptor 4 signaling pathway	1/28	27/18614	0.0398575	0.0998137	0.0563774	APPL1	1	BP
GO:0046174	polyol catabolic process	1/28	27/18614	0.0398575	0.0998137	0.0563774	PTEN	1	BP
GO:0048641	regulation of skeletal muscle tissue development	1/28	27/18614	0.0398575	0.0998137	0.0563774	CTNNB1	1	BP
GO:0070861	regulation of protein exit from endoplasmic reticulum	1/28	27/18614	0.0398575	0.0998137	0.0563774	BRSK2	1	BP
GO:0099558	maintenance of synapse structure	1/28	27/18614	0.0398575	0.0998137	0.0563774	APPL1	1	BP
GO:1904666	regulation of ubiquitin protein ligase activity	1/28	27/18614	0.0398575	0.0998137	0.0563774	PTEN	1	BP
GO:0045619	regulation of lymphocyte differentiation	2/28	212/18614	0.0401958	0.100518	0.0567753	FOXO3/RIPK2	2	BP
GO:0031396	regulation of protein ubiquitination	2/28	213/18614	0.0405397	0.100997	0.0570458	RIPK2/PTEN	2	BP
GO:0042098	T cell proliferation	2/28	213/18614	0.0405397	0.100997	0.0570458	RIPK2/CTNNB1	2	BP
GO:0045637	regulation of myeloid cell differentiation	2/28	214/18614	0.0408846	0.100997	0.0570458	FOXO3/CTNNB1	2	BP
GO:0001702	gastrulation with mouth forming second	1/28	28/18614	0.0413039	0.100997	0.0570458	CTNNB1	1	BP
GO:0010971	positive regulation of G2/M transition of mitotic cell cycle	1/28	28/18614	0.0413039	0.100997	0.0570458	CCND1	1	BP
GO:0016540	protein autoprocessing	1/28	28/18614	0.0413039	0.100997	0.0570458	FXN	1	BP
GO:0042059	negative regulation of epidermal growth factor receptor signaling pathway	1/28	28/18614	0.0413039	0.100997	0.0570458	EGFR	1	BP
GO:0045686	negative regulation of glial cell differentiation	1/28	28/18614	0.0413039	0.100997	0.0570458	CTNNB1	1	BP
GO:0051569	regulation of histone H3-K4 methylation	1/28	28/18614	0.0413039	0.100997	0.0570458	CTNNB1	1	BP
GO:0060479	lung cell differentiation	1/28	28/18614	0.0413039	0.100997	0.0570458	CTNNB1	1	BP
GO:0060487	lung epithelial cell differentiation	1/28	28/18614	0.0413039	0.100997	0.0570458	CTNNB1	1	BP
GO:0060512	prostate gland morphogenesis	1/28	28/18614	0.0413039	0.100997	0.0570458	TP63	1	BP
GO:0071624	positive regulation of granulocyte chemotaxis	1/28	28/18614	0.0413039	0.100997	0.0570458	RAC1	1	BP
GO:0098698	postsynaptic specialization assembly	1/28	28/18614	0.0413039	0.100997	0.0570458	PTEN	1	BP
GO:1900078	positive regulation of cellular response to insulin stimulus	1/28	28/18614	0.0413039	0.100997	0.0570458	CTSD	1	BP
GO:1902883	negative regulation of response to oxidative stress	1/28	28/18614	0.0413039	0.100997	0.0570458	TRAP1	1	BP
GO:0006469	negative regulation of protein kinase activity	2/28	217/18614	0.0419264	0.101983	0.0576025	PTEN/HSPB1	2	BP
GO:0002052	positive regulation of neuroblast proliferation	1/28	29/18614	0.0427482	0.101983	0.0576025	CTNNB1	1	BP
GO:0003156	regulation of animal organ formation	1/28	29/18614	0.0427482	0.101983	0.0576025	CTNNB1	1	BP
GO:0007263	nitric oxide mediated signal transduction	1/28	29/18614	0.0427482	0.101983	0.0576025	EGFR	1	BP
GO:0010592	positive regulation of lamellipodium assembly	1/28	29/18614	0.0427482	0.101983	0.0576025	RAC1	1	BP
GO:0010800	positive regulation of peptidyl-threonine phosphorylation	1/28	29/18614	0.0427482	0.101983	0.0576025	RIPK2	1	BP
GO:0015868	purine ribonucleotide transport	1/28	29/18614	0.0427482	0.101983	0.0576025	SLC25A5	1	BP
GO:0030970	retrograde protein transport, ER to cytosol	1/28	29/18614	0.0427482	0.101983	0.0576025	BRSK2	1	BP
GO:0031571	mitotic G1 DNA damage checkpoint signaling	1/28	29/18614	0.0427482	0.101983	0.0576025	CCND1	1	BP
GO:0032607	interferon-alpha production	1/28	29/18614	0.0427482	0.101983	0.0576025	RIPK2	1	BP
GO:0032647	regulation of interferon-alpha production	1/28	29/18614	0.0427482	0.101983	0.0576025	RIPK2	1	BP
GO:0044819	mitotic G1/S transition checkpoint signaling	1/28	29/18614	0.0427482	0.101983	0.0576025	CCND1	1	BP
GO:0060441	epithelial tube branching involved in lung morphogenesis	1/28	29/18614	0.0427482	0.101983	0.0576025	CTNNB1	1	BP
GO:0061436	establishment of skin barrier	1/28	29/18614	0.0427482	0.101983	0.0576025	TP63	1	BP
GO:0072530	purine-containing compound transmembrane transport	1/28	29/18614	0.0427482	0.101983	0.0576025	SLC25A5	1	BP
GO:1900017	positive regulation of cytokine production involved in inflammatory response	1/28	29/18614	0.0427482	0.101983	0.0576025	APPL1	1	BP
GO:1903205	regulation of hydrogen peroxide-induced cell death	1/28	29/18614	0.0427482	0.101983	0.0576025	TRAP1	1	BP
GO:1903513	endoplasmic reticulum to cytosol transport	1/28	29/18614	0.0427482	0.101983	0.0576025	BRSK2	1	BP
GO:0006457	protein folding	2/28	220/18614	0.0429782	0.102393	0.0578341	HSPB1/TRAP1	2	BP
GO:0044242	cellular lipid catabolic process	2/28	222/18614	0.0436849	0.103796	0.0586266	SGPL1/GLA	2	BP
GO:0070374	positive regulation of ERK1 and ERK2 cascade	2/28	222/18614	0.0436849	0.103796	0.0586266	EGFR/RIPK2	2	BP
GO:0002825	regulation of T-helper 1 type immune response	1/28	30/18614	0.0441904	0.104294	0.0589081	RIPK2	1	BP
GO:0007202	activation of phospholipase C activity	1/28	30/18614	0.0441904	0.104294	0.0589081	EGFR	1	BP
GO:0008209	androgen metabolic process	1/28	30/18614	0.0441904	0.104294	0.0589081	SGPL1	1	BP
GO:0016226	iron-sulfur cluster assembly	1/28	30/18614	0.0441904	0.104294	0.0589081	FXN	1	BP
GO:0031163	metallo-sulfur cluster assembly	1/28	30/18614	0.0441904	0.104294	0.0589081	FXN	1	BP
GO:0007163	establishment or maintenance of cell polarity	2/28	226/18614	0.0451115	0.105435	0.0595522	BRSK2/RAC1	2	BP
GO:0002685	regulation of leukocyte migration	2/28	227/18614	0.0454709	0.105435	0.0595522	RAC1/HMOX1	2	BP
GO:0097191	extrinsic apoptotic signaling pathway	2/28	227/18614	0.0454709	0.105435	0.0595522	PTEN/HMOX1	2	BP
GO:0006783	heme biosynthetic process	1/28	31/18614	0.0456305	0.105435	0.0595522	FXN	1	BP
GO:0010464	regulation of mesenchymal cell proliferation	1/28	31/18614	0.0456305	0.105435	0.0595522	CTNNB1	1	BP
GO:0019886	antigen processing and presentation of exogenous peptide antigen via MHC class II	1/28	31/18614	0.0456305	0.105435	0.0595522	CTSD	1	BP
GO:0033137	negative regulation of peptidyl-serine phosphorylation	1/28	31/18614	0.0456305	0.105435	0.0595522	PTEN	1	BP
GO:0035767	endothelial cell chemotaxis	1/28	31/18614	0.0456305	0.105435	0.0595522	HSPB1	1	BP
GO:0043304	regulation of mast cell degranulation	1/28	31/18614	0.0456305	0.105435	0.0595522	HMOX1	1	BP
GO:0060325	face morphogenesis	1/28	31/18614	0.0456305	0.105435	0.0595522	SGPL1	1	BP
GO:0061311	cell surface receptor signaling pathway involved in heart development	1/28	31/18614	0.0456305	0.105435	0.0595522	CTNNB1	1	BP
GO:0150117	positive regulation of cell-substrate junction organization	1/28	31/18614	0.0456305	0.105435	0.0595522	RAC1	1	BP
GO:1902042	negative regulation of extrinsic apoptotic signaling pathway via death domain receptors	1/28	31/18614	0.0456305	0.105435	0.0595522	HMOX1	1	BP
GO:1902751	positive regulation of cell cycle G2/M phase transition	1/28	31/18614	0.0456305	0.105435	0.0595522	CCND1	1	BP
GO:1903203	regulation of oxidative stress-induced neuron death	1/28	31/18614	0.0456305	0.105435	0.0595522	CTNNB1	1	BP
GO:2000463	positive regulation of excitatory postsynaptic potential	1/28	31/18614	0.0456305	0.105435	0.0595522	PTEN	1	BP
GO:0008406	gonad development	2/28	228/18614	0.0458313	0.10576	0.0597361	SGPL1/CCND1	2	BP
GO:0048705	skeletal system morphogenesis	2/28	229/18614	0.0461929	0.106387	0.0600901	SGPL1/CTNNB1	2	BP
GO:0031669	cellular response to nutrient levels	2/28	230/18614	0.0465555	0.106387	0.0600901	FOXO3/HMOX1	2	BP
GO:0050920	regulation of chemotaxis	2/28	230/18614	0.0465555	0.106387	0.0600901	RAC1/HSPB1	2	BP
GO:1903050	regulation of proteolysis involved in protein catabolic process	2/28	230/18614	0.0465555	0.106387	0.0600901	UBQLN2/PTEN	2	BP
GO:0071241	cellular response to inorganic substance	2/28	231/18614	0.0469191	0.106387	0.0600901	EGFR/HMOX1	2	BP
GO:0002431	Fc receptor mediated stimulatory signaling pathway	1/28	32/18614	0.0470685	0.106387	0.0600901	APPL1	1	BP
GO:0003338	metanephros morphogenesis	1/28	32/18614	0.0470685	0.106387	0.0600901	CTNNB1	1	BP
GO:0007435	salivary gland morphogenesis	1/28	32/18614	0.0470685	0.106387	0.0600901	EGFR	1	BP
GO:0007628	adult walking behavior	1/28	32/18614	0.0470685	0.106387	0.0600901	FXN	1	BP
GO:0010165	response to X-ray	1/28	32/18614	0.0470685	0.106387	0.0600901	CCND1	1	BP
GO:0031116	positive regulation of microtubule polymerization	1/28	32/18614	0.0470685	0.106387	0.0600901	RAC1	1	BP
GO:0045671	negative regulation of osteoclast differentiation	1/28	32/18614	0.0470685	0.106387	0.0600901	CTNNB1	1	BP
GO:0045736	negative regulation of cyclin-dependent protein serine/threonine kinase activity	1/28	32/18614	0.0470685	0.106387	0.0600901	PTEN	1	BP
GO:0046685	response to arsenic-containing substance	1/28	32/18614	0.0470685	0.106387	0.0600901	HMOX1	1	BP
GO:0051503	adenine nucleotide transport	1/28	32/18614	0.0470685	0.106387	0.0600901	SLC25A5	1	BP
GO:0061037	negative regulation of cartilage development	1/28	32/18614	0.0470685	0.106387	0.0600901	CTNNB1	1	BP
GO:0002218	activation of innate immune response	2/28	233/18614	0.0476497	0.107288	0.060599	RIPK2/APPL1	2	BP
GO:0045137	development of primary sexual characteristics	2/28	233/18614	0.0476497	0.107288	0.060599	SGPL1/CCND1	2	BP
GO:0051651	maintenance of location in cell	2/28	233/18614	0.0476497	0.107288	0.060599	S100A8/S100A9	2	BP
GO:0050807	regulation of synapse organization	2/28	234/18614	0.0480165	0.107564	0.0607549	PTEN/CTNNB1	2	BP
GO:0015012	heparan sulfate proteoglycan biosynthetic process	1/28	33/18614	0.0485044	0.107564	0.0607549	CTNNB1	1	BP
GO:0033006	regulation of mast cell activation involved in immune response	1/28	33/18614	0.0485044	0.107564	0.0607549	HMOX1	1	BP
GO:0036474	cell death in response to hydrogen peroxide	1/28	33/18614	0.0485044	0.107564	0.0607549	TRAP1	1	BP
GO:0038094	Fc-gamma receptor signaling pathway	1/28	33/18614	0.0485044	0.107564	0.0607549	APPL1	1	BP
GO:0060795	cell fate commitment involved in formation of primary germ layer	1/28	33/18614	0.0485044	0.107564	0.0607549	CTNNB1	1	BP
GO:0090279	regulation of calcium ion import	1/28	33/18614	0.0485044	0.107564	0.0607549	CTNNB1	1	BP
GO:1901185	negative regulation of ERBB signaling pathway	1/28	33/18614	0.0485044	0.107564	0.0607549	EGFR	1	BP
GO:1901889	negative regulation of cell junction assembly	1/28	33/18614	0.0485044	0.107564	0.0607549	PTEN	1	BP
GO:1904030	negative regulation of cyclin-dependent protein kinase activity	1/28	33/18614	0.0485044	0.107564	0.0607549	PTEN	1	BP
GO:1904861	excitatory synapse assembly	1/28	33/18614	0.0485044	0.107564	0.0607549	PTEN	1	BP
GO:1905207	regulation of cardiocyte differentiation	1/28	33/18614	0.0485044	0.107564	0.0607549	EGFR	1	BP
GO:0006909	phagocytosis	2/28	236/18614	0.0487534	0.107761	0.0608665	RAC1/APPL1	2	BP
GO:0051403	stress-activated MAPK cascade	2/28	237/18614	0.0491234	0.107761	0.0608665	EGFR/RIPK2	2	BP
GO:0072593	reactive oxygen species metabolic process	2/28	237/18614	0.0491234	0.107761	0.0608665	RAC1/TRAP1	2	BP
GO:0033673	negative regulation of kinase activity	2/28	239/18614	0.0498665	0.107761	0.0608665	PTEN/HSPB1	2	BP
GO:0050670	regulation of lymphocyte proliferation	2/28	239/18614	0.0498665	0.107761	0.0608665	RIPK2/CTNNB1	2	BP
GO:0007431	salivary gland development	1/28	34/18614	0.0499382	0.107761	0.0608665	EGFR	1	BP
GO:0015865	purine nucleotide transport	1/28	34/18614	0.0499382	0.107761	0.0608665	SLC25A5	1	BP
GO:0032212	positive regulation of telomere maintenance via telomerase	1/28	34/18614	0.0499382	0.107761	0.0608665	CTNNB1	1	BP
GO:0032743	positive regulation of interleukin-2 production	1/28	34/18614	0.0499382	0.107761	0.0608665	RIPK2	1	BP
GO:0034383	low-density lipoprotein particle clearance	1/28	34/18614	0.0499382	0.107761	0.0608665	HMOX1	1	BP
GO:0036475	neuron death in response to oxidative stress	1/28	34/18614	0.0499382	0.107761	0.0608665	CTNNB1	1	BP
GO:0043372	positive regulation of CD4-positive, alpha-beta T cell differentiation	1/28	34/18614	0.0499382	0.107761	0.0608665	RIPK2	1	BP
GO:0045648	positive regulation of erythrocyte differentiation	1/28	34/18614	0.0499382	0.107761	0.0608665	FOXO3	1	BP
GO:0051450	myoblast proliferation	1/28	34/18614	0.0499382	0.107761	0.0608665	CTNNB1	1	BP
GO:0051973	positive regulation of telomerase activity	1/28	34/18614	0.0499382	0.107761	0.0608665	CTNNB1	1	BP
GO:0060074	synapse maturation	1/28	34/18614	0.0499382	0.107761	0.0608665	PTEN	1	BP
GO:0060914	heart formation	1/28	34/18614	0.0499382	0.107761	0.0608665	CTNNB1	1	BP
GO:0090022	regulation of neutrophil chemotaxis	1/28	34/18614	0.0499382	0.107761	0.0608665	RAC1	1	BP
GO:0090659	walking behavior	1/28	34/18614	0.0499382	0.107761	0.0608665	FXN	1	BP
GO:0110110	positive regulation of animal organ morphogenesis	1/28	34/18614	0.0499382	0.107761	0.0608665	CTNNB1	1	BP
GO:1901658	glycosyl compound catabolic process	1/28	34/18614	0.0499382	0.107761	0.0608665	GLA	1	BP
GO:1902624	positive regulation of neutrophil migration	1/28	34/18614	0.0499382	0.107761	0.0608665	RAC1	1	BP
GO:0031983	vesicle lumen	6/28	327/19518	5.8304e-06	0.000962017	0.00058304	EGFR/PAFAH1B2/GLA/S100A8/S100A9/CTSD	6	CC
GO:0034774	secretory granule lumen	5/28	322/19518	8.52365e-05	0.0048974	0.00296812	PAFAH1B2/GLA/S100A8/S100A9/CTSD	5	CC
GO:0060205	cytoplasmic vesicle lumen	5/28	325/19518	8.90436e-05	0.0048974	0.00296812	PAFAH1B2/GLA/S100A8/S100A9/CTSD	5	CC
GO:0017053	transcription repressor complex	3/28	78/19518	0.000187163	0.0067977	0.00411982	FOXO3/CCND1/CTNNB1	3	CC
GO:0090571	RNA polymerase II transcription repressor complex	2/28	15/19518	0.000205991	0.0067977	0.00411982	FOXO3/CTNNB1	2	CC
GO:0042470	melanosome	3/28	112/19518	0.000542742	0.0116142	0.0070389	SEC22B/RAC1/CTSD	3	CC
GO:0048770	pigment granule	3/28	112/19518	0.000542742	0.0116142	0.0070389	SEC22B/RAC1/CTSD	3	CC
GO:0005759	mitochondrial matrix	5/28	484/19518	0.000563112	0.0116142	0.0070389	FOXO3/FXN/DAP3/SLC25A5/TRAP1	5	CC
GO:0045121	membrane raft	4/28	323/19518	0.00110141	0.0183823	0.0111408	EGFR/HMOX1/CTSD/CTNNB1	4	CC
GO:0098857	membrane microdomain	4/28	324/19518	0.00111408	0.0183823	0.0111408	EGFR/HMOX1/CTSD/CTNNB1	4	CC
GO:0001726	ruffle	3/28	181/19518	0.00216651	0.0316984	0.0192112	RAC1/EGFR/APPL1	3	CC
GO:0101002	ficolin-1-rich granule	3/28	185/19518	0.00230534	0.0316984	0.0192112	RAC1/PAFAH1B2/CTSD	3	CC
GO:0005925	focal adhesion	4/28	422/19518	0.00292405	0.0344621	0.0208861	RAC1/EGFR/HSPB1/CTNNB1	4	CC
GO:0031252	cell leading edge	4/28	422/19518	0.00292405	0.0344621	0.0208861	RAC1/EGFR/APPL1/CTNNB1	4	CC
GO:0030055	cell-substrate junction	4/28	432/19518	0.00318084	0.0349892	0.0212056	RAC1/EGFR/HSPB1/CTNNB1	4	CC
GO:0005901	caveola	2/28	83/19518	0.00628594	0.0648237	0.0392871	HMOX1/CTNNB1	2	CC
GO:0043202	lysosomal lumen	2/28	98/19518	0.00866414	0.0797315	0.0483221	GLA/CTSD	2	CC
GO:0098798	mitochondrial protein-containing complex	3/28	300/19518	0.00886324	0.0797315	0.0483221	FXN/DAP3/SLC25A5	3	CC
GO:0032587	ruffle membrane	2/28	101/19518	0.0091812	0.0797315	0.0483221	RAC1/EGFR	2	CC
GO:0016605	PML body	2/28	105/19518	0.00989165	0.0816061	0.0494583	PTEN/DAPK3	2	CC
GO:0044853	plasma membrane raft	2/28	114/19518	0.0115767	0.083549	0.0506358	HMOX1/CTNNB1	2	CC
GO:0030139	endocytic vesicle	3/28	347/19518	0.0131328	0.083549	0.0506358	SEC22B/EGFR/APPL1	3	CC
GO:0031253	cell projection membrane	3/28	349/19518	0.0133364	0.083549	0.0506358	RAC1/EGFR/CTNNB1	3	CC
GO:1904813	ficolin-1-rich granule lumen	2/28	124/19518	0.0135863	0.083549	0.0506358	PAFAH1B2/CTSD	2	CC
GO:0005923	bicellular tight junction	2/28	126/19518	0.0140053	0.083549	0.0506358	CCND1/CTNNB1	2	CC
GO:0030018	Z disc	2/28	129/19518	0.0146441	0.083549	0.0506358	HSPB1/CTNNB1	2	CC
GO:0070160	tight junction	2/28	131/19518	0.015077	0.083549	0.0506358	CCND1/CTNNB1	2	CC
GO:0030877	beta-catenin destruction complex	1/28	11/19518	0.0156716	0.083549	0.0506358	CTNNB1	1	CC
GO:0043220	Schmidt-Lanterman incisure	1/28	11/19518	0.0156716	0.083549	0.0506358	PTEN	1	CC
GO:1990229	iron-sulfur cluster assembly complex	1/28	12/19518	0.0170845	0.083549	0.0506358	FXN	1	CC
GO:0031674	I band	2/28	141/19518	0.0173231	0.083549	0.0506358	HSPB1/CTNNB1	2	CC
GO:0045335	phagocytic vesicle	2/28	141/19518	0.0173231	0.083549	0.0506358	SEC22B/APPL1	2	CC
GO:0032009	early phagosome	1/28	13/19518	0.0184954	0.083549	0.0506358	APPL1	1	CC
GO:0099092	postsynaptic density, intracellular component	1/28	13/19518	0.0184954	0.083549	0.0506358	CTNNB1	1	CC
GO:1990907	beta-catenin-TCF complex	1/28	13/19518	0.0184954	0.083549	0.0506358	CTNNB1	1	CC
GO:1990909	Wnt signalosome	1/28	13/19518	0.0184954	0.083549	0.0506358	CTNNB1	1	CC
GO:0019897	extrinsic component of plasma membrane	2/28	147/19518	0.0187352	0.083549	0.0506358	RAC1/CTNNB1	2	CC
GO:0043296	apical junction complex	2/28	150/19518	0.019459	0.0840091	0.0509146	CCND1/CTNNB1	2	CC
GO:0043218	compact myelin	1/28	14/19518	0.0199044	0.0840091	0.0509146	PTEN	1	CC
GO:0098978	glutamatergic synapse	3/28	410/19518	0.0204302	0.0840091	0.0509146	RAC1/APPL1/CTNNB1	3	CC
GO:0062023	collagen-containing extracellular matrix	3/28	415/19518	0.0210882	0.0840091	0.0509146	S100A8/S100A9/CTSD	3	CC
GO:0009898	cytoplasmic side of plasma membrane	2/28	159/19518	0.0217003	0.0840091	0.0509146	RAC1/PTEN	2	CC
GO:0005819	spindle	3/28	421/19518	0.0218933	0.0840091	0.0509146	HSPB1/SLC25A5/CTNNB1	3	CC
GO:0099091	postsynaptic specialization, intracellular component	1/28	16/19518	0.0227165	0.0842961	0.0510885	CTNNB1	1	CC
GO:0070820	tertiary granule	2/28	164/19518	0.0229898	0.0842961	0.0510885	RAC1/CTSD	2	CC
GO:0043020	NADPH oxidase complex	1/28	18/19518	0.0255208	0.0882615	0.0534918	RAC1	1	CC
GO:0098831	presynaptic active zone cytoplasmic component	1/28	18/19518	0.0255208	0.0882615	0.0534918	CTNNB1	1	CC
GO:0043197	dendritic spine	2/28	175/19518	0.0259359	0.0882615	0.0534918	RAC1/PTEN	2	CC
GO:0005775	vacuolar lumen	2/28	176/19518	0.026211	0.0882615	0.0534918	GLA/CTSD	2	CC
GO:0044309	neuron spine	2/28	178/19518	0.0267648	0.0883239	0.0535296	RAC1/PTEN	2	CC
GO:0031256	leading edge membrane	2/28	180/19518	0.0273234	0.0883993	0.0535753	RAC1/EGFR	2	CC
GO:0031901	early endosome membrane	2/28	187/19518	0.0293157	0.0930209	0.0563763	EGFR/APPL1	2	CC
GO:0098562	cytoplasmic side of membrane	2/28	193/19518	0.0310686	0.0960827	0.058232	RAC1/PTEN	2	CC
GO:0030666	endocytic vesicle membrane	2/28	196/19518	0.0319605	0.0960827	0.058232	SEC22B/EGFR	2	CC
GO:0016327	apicolateral plasma membrane	1/28	23/19518	0.0324977	0.0960827	0.058232	CTNNB1	1	CC
GO:0005743	mitochondrial inner membrane	3/28	497/19518	0.0335503	0.0960827	0.058232	DAP3/SLC25A5/TRAP1	3	CC
GO:0030027	lamellipodium	2/28	202/19518	0.0337745	0.0960827	0.058232	RAC1/CTNNB1	2	CC
GO:0030662	coated vesicle membrane	2/28	202/19518	0.0337745	0.0960827	0.058232	SEC22B/EGFR	2	CC
GO:0005741	mitochondrial outer membrane	2/28	208/19518	0.0356284	0.0996387	0.0603871	FOXO3/HMOX1	2	CC
GO:0046930	pore complex	1/28	26/19518	0.0366607	0.100631	0.0609887	SLC25A5	1	CC
GO:0030017	sarcomere	2/28	213/19518	0.0372031	0.100631	0.0609887	HSPB1/CTNNB1	2	CC
GO:0031528	microvillus membrane	1/28	30/19518	0.0421845	0.108728	0.0658958	CTNNB1	1	CC
GO:0016342	catenin complex	1/28	31/19518	0.0435607	0.108728	0.0658958	CTNNB1	1	CC
GO:0030016	myofibril	2/28	233/19518	0.0437643	0.108728	0.0658958	HSPB1/CTNNB1	2	CC
GO:0016323	basolateral plasma membrane	2/28	234/19518	0.0441031	0.108728	0.0658958	EGFR/CTNNB1	2	CC
GO:0031968	organelle outer membrane	2/28	236/19518	0.0447836	0.108728	0.0658958	FOXO3/HMOX1	2	CC
GO:0000314	organellar small ribosomal subunit	1/28	32/19518	0.044935	0.108728	0.0658958	DAP3	1	CC
GO:0005763	mitochondrial small ribosomal subunit	1/28	32/19518	0.044935	0.108728	0.0658958	DAP3	1	CC
GO:0019867	outer membrane	2/28	238/19518	0.0454681	0.108728	0.0658958	FOXO3/HMOX1	2	CC
GO:0043292	contractile fiber	2/28	243/19518	0.0471964	0.111249	0.0674235	HSPB1/CTNNB1	2	CC
GO:0050786	RAGE receptor binding	2/28	10/18369	0.000100071	0.0141373	0.00967288	S100A8/S100A9	2	MF
GO:0035325	Toll-like receptor binding	2/28	13/18369	0.000172966	0.0141373	0.00967288	S100A8/S100A9	2	MF
GO:0016722	oxidoreductase activity, acting on metal ions	2/28	16/18369	0.000265349	0.0141373	0.00967288	CP/FXN	2	MF
GO:0036041	long-chain fatty acid binding	2/28	19/18369	0.000377054	0.0141373	0.00967288	S100A8/S100A9	2	MF
GO:0004674	protein serine/threonine kinase activity	5/28	421/18369	0.000392702	0.0141373	0.00967288	BRSK2/EGFR/RIPK2/CAMKK2/DAPK3	5	MF
GO:0004709	MAP kinase kinase kinase activity	2/28	22/18369	0.000507916	0.0152375	0.0104256	EGFR/RIPK2	2	MF
GO:0004713	protein tyrosine kinase activity	3/28	137/18369	0.00115987	0.0298253	0.0204068	EGFR/RIPK2/CAMKK2	3	MF
GO:0106310	protein serine kinase activity	4/28	363/18369	0.00211042	0.0474844	0.0324893	BRSK2/RIPK2/CAMKK2/DAPK3	4	MF
GO:0005504	fatty acid binding	2/28	49/18369	0.00252083	0.0504167	0.0344956	S100A8/S100A9	2	MF
GO:0044183	protein folding chaperone	2/28	67/18369	0.0046599	0.0838782	0.0573904	HSPB1/TRAP1	2	MF
GO:0033293	monocarboxylic acid binding	2/28	80/18369	0.00657922	0.10766	0.0736621	S100A8/S100A9	2	MF
GO:0051117	ATPase binding	2/28	86/18369	0.00756711	0.109529	0.0749409	BRSK2/EGFR	2	MF
GO:0008013	beta-catenin binding	2/28	88/18369	0.00791043	0.109529	0.0749409	FOXO3/CTNNB1	2	MF
GO:0016832	aldehyde-lyase activity	1/28	10/18369	0.0151426	0.122734	0.083976	SGPL1	1	MF
GO:0034594	phosphatidylinositol trisphosphate phosphatase activity	1/28	10/18369	0.0151426	0.122734	0.083976	PTEN	1	MF
GO:0045294	alpha-catenin binding	1/28	10/18369	0.0151426	0.122734	0.083976	CTNNB1	1	MF
GO:0004706	JUN kinase kinase kinase activity	1/28	11/18369	0.0166447	0.122734	0.083976	RIPK2	1	MF
GO:0005347	ATP transmembrane transporter activity	1/28	11/18369	0.0166447	0.122734	0.083976	SLC25A5	1	MF
GO:0008199	ferric iron binding	1/28	11/18369	0.0166447	0.122734	0.083976	FXN	1	MF
GO:0031996	thioesterase binding	1/28	11/18369	0.0166447	0.122734	0.083976	RAC1	1	MF
GO:0043422	protein kinase B binding	1/28	11/18369	0.0166447	0.122734	0.083976	APPL1	1	MF
GO:0043522	leucine zipper domain binding	1/28	11/18369	0.0166447	0.122734	0.083976	DAPK3	1	MF
GO:0097371	MDM2/MDM4 family protein binding	1/28	11/18369	0.0166447	0.122734	0.083976	TP63	1	MF
GO:0016530	metallochaperone activity	1/28	12/18369	0.0181445	0.122734	0.083976	FXN	1	MF
GO:0002020	protease binding	2/28	138/18369	0.0186413	0.122734	0.083976	RIPK2/PTEN	2	MF
GO:0015631	tubulin binding	3/28	374/18369	0.0188172	0.122734	0.083976	S100A8/S100A9/APPL1	3	MF
GO:0019903	protein phosphatase binding	2/28	140/18369	0.0191517	0.122734	0.083976	EGFR/CTNNB1	2	MF
GO:0004438	phosphatidylinositol-3-phosphate phosphatase activity	1/28	13/18369	0.0196421	0.122734	0.083976	PTEN	1	MF
GO:0052744	phosphatidylinositol monophosphate phosphatase activity	1/28	14/18369	0.0211376	0.122734	0.083976	PTEN	1	MF
GO:0070411	I-SMAD binding	1/28	14/18369	0.0211376	0.122734	0.083976	CTNNB1	1	MF
GO:0089720	caspase binding	1/28	14/18369	0.0211376	0.122734	0.083976	RIPK2	1	MF
GO:0050700	CARD domain binding	1/28	15/18369	0.0226308	0.123441	0.0844594	RIPK2	1	MF
GO:1990226	histone methyltransferase binding	1/28	15/18369	0.0226308	0.123441	0.0844594	CTNNB1	1	MF
GO:0030275	LRR domain binding	1/28	16/18369	0.0241218	0.124055	0.0848797	DAPK3	1	MF
GO:0030297	transmembrane receptor protein tyrosine kinase activator activity	1/28	16/18369	0.0241218	0.124055	0.0848797	EGFR	1	MF
GO:0070064	proline-rich region binding	1/28	17/18369	0.0256106	0.127659	0.087346	CCND1	1	MF
GO:0005346	purine ribonucleotide transmembrane transporter activity	1/28	18/18369	0.0270973	0.127659	0.087346	SLC25A5	1	MF
GO:0052745	inositol phosphate phosphatase activity	1/28	18/18369	0.0270973	0.127659	0.087346	PTEN	1	MF
GO:0140693	molecular condensate scaffold activity	1/28	19/18369	0.0285817	0.127659	0.087346	UBQLN2	1	MF
GO:0010314	phosphatidylinositol-5-phosphate binding	1/28	20/18369	0.030064	0.127659	0.087346	PHLDA3	1	MF
GO:0000295	adenine nucleotide transmembrane transporter activity	1/28	21/18369	0.0315441	0.127659	0.087346	SLC25A5	1	MF
GO:1990381	ubiquitin-specific protease binding	1/28	21/18369	0.0315441	0.127659	0.087346	PTEN	1	MF
GO:0019902	phosphatase binding	2/28	187/18369	0.0327641	0.127659	0.087346	EGFR/CTNNB1	2	MF
GO:0016004	phospholipase activator activity	1/28	22/18369	0.033022	0.127659	0.087346	EGFR	1	MF
GO:0050321	tau-protein kinase activity	1/28	22/18369	0.033022	0.127659	0.087346	BRSK2	1	MF
GO:0050699	WW domain binding	1/28	23/18369	0.0344978	0.127659	0.087346	TP63	1	MF
GO:0140297	DNA-binding transcription factor binding	3/28	478/18369	0.035436	0.127659	0.087346	HSPB1/DAPK3/CTNNB1	3	MF
GO:0015216	purine nucleotide transmembrane transporter activity	1/28	24/18369	0.0359713	0.127659	0.087346	SLC25A5	1	MF
GO:0031406	carboxylic acid binding	2/28	200/18369	0.0370406	0.127659	0.087346	S100A8/S100A9	2	MF
GO:0051537	2 iron, 2 sulfur cluster binding	1/28	25/18369	0.0374427	0.127659	0.087346	FXN	1	MF
GO:0060229	lipase activator activity	1/28	25/18369	0.0374427	0.127659	0.087346	EGFR	1	MF
GO:0004190	aspartic-type endopeptidase activity	1/28	26/18369	0.038912	0.127659	0.087346	CTSD	1	MF
GO:0034593	phosphatidylinositol bisphosphate phosphatase activity	1/28	26/18369	0.038912	0.127659	0.087346	PTEN	1	MF
GO:0004683	calmodulin-dependent protein kinase activity	1/28	27/18369	0.040379	0.127659	0.087346	CAMKK2	1	MF
GO:0008198	ferrous iron binding	1/28	27/18369	0.040379	0.127659	0.087346	FXN	1	MF
GO:0070001	aspartic-type peptidase activity	1/28	27/18369	0.040379	0.127659	0.087346	CTSD	1	MF
GO:0043177	organic acid binding	2/28	212/18369	0.0411694	0.127659	0.087346	S100A8/S100A9	2	MF
GO:0015215	nucleotide transmembrane transporter activity	1/28	28/18369	0.0418439	0.127659	0.087346	SLC25A5	1	MF
GO:0080025	phosphatidylinositol-3,5-bisphosphate binding	1/28	28/18369	0.0418439	0.127659	0.087346	PHLDA3	1	MF
GO:0043325	phosphatidylinositol-3,4-bisphosphate binding	1/28	29/18369	0.0433067	0.12992	0.0888927	PHLDA3	1	MF
GO:0005164	tumor necrosis factor receptor binding	1/28	30/18369	0.0447673	0.12997	0.0889265	TRAP1	1	MF
GO:0052866	phosphatidylinositol phosphate phosphatase activity	1/28	30/18369	0.0447673	0.12997	0.0889265	PTEN	1	MF
GO:0015605	organophosphate ester transmembrane transporter activity	1/28	33/18369	0.0491362	0.140389	0.0960557	SLC25A5	1	MF
