# Supplementary material for: Identification of biomarkers associated with endoplasmic reticulum stress-related cell death in osteoporosis based on bulk and single-cell transcriptomic analyses and experimental validation
Source: Research Square preprint supplement (doi:10.21203/rs.3.rs-8454279/v1), 2026-01-12
Supplement: Supplementary file 6 [file 4f8738eb69171a8afcd28193.xlsx]

## Sheet: gsva_result_res
Supplementary Table 15
Pathway	Name	B_cells	BM_MSC	Monocytes	Neutrophil	NRBC	T_cells
R-HSA-166658	Complement cascade	-0.0913119	0.0671075061495817	-0.0268489	-0.149293	-0.140084	-0.180602
R-HSA-166663	Initial triggering of complement	-0.0727666	-0.022592	-0.0681094	-0.395139	-0.365225	-0.405205
R-HSA-166786	Creation of C4 and C2 activators	-0.0110076	-0.0059913	-0.0887866	-0.508952	-0.528313	-0.632858
R-HSA-173623	Classical antibody-mediated complement activation	0.1678415473581	-0.0824934	-0.0520065	-0.57949	-0.491921	-0.632041
R-HSA-198933	Immunoregulatory interactions between a Lymphoid and a non-Lymphoid cell	-0.23185	-0.148084	0.0174299106268246	-0.343999	-0.330496	-0.153969
R-HSA-2029480	Fcgamma receptor (FCGR) dependent phagocytosis	-0.194305	-0.157755	-0.068527	-0.21017	-0.202164	-0.159319
R-HSA-2029481	FCGR activation	-0.195719	-0.207563	-0.0489467	-0.322161	-0.264674	-0.240918
R-HSA-2029482	Regulation of actin dynamics for phagocytic cup formation	-0.188349	-0.175218	-0.0665213	-0.215329	-0.200036	-0.154808
R-HSA-2029485	Role of phospholipids in phagocytosis	-0.0811269	-0.0789698	-0.0225954	-0.197402	-0.226953	-0.132858
R-HSA-2168880	Scavenging of heme from plasma	-0.0910464	-0.088848	0.0230853027114891	-0.296651	-0.0103873	-0.321299
R-HSA-2173782	Binding and Uptake of Ligands by Scavenger Receptors	-0.193587	-0.0332678	-0.063882	-0.236363	-0.142112	-0.229235
R-HSA-2730905	Role of LAT2/NTAL/LAB on calcium mobilization	-0.259723	-0.208271	-0.0319719	-0.345126	-0.319317	-0.250597
R-HSA-2871796	FCERI mediated MAPK activation	-0.207783	-0.186791	-0.0858392	-0.222071	-0.216579	-0.194737
R-HSA-2871809	FCERI mediated Ca+2 mobilization	-0.0858913	-0.073068	-0.00679793	-0.149794	-0.135097	-0.113858
R-HSA-5690714	CD22 mediated BCR regulation	0.01217325844256	-0.295688	0.132697901406517	-0.334199	-0.257655	-0.350133
R-HSA-977606	Regulation of Complement cascade	-0.0542765	0.0649505071215075	-0.0160675	-0.128464	-0.101011	-0.150417
R-HSA-983695	Antigen activates B Cell Receptor (BCR) leading to generation of second messengers	-0.15799	-0.121066	0.0176964443060964	-0.2156	-0.193994	-0.193339
R-HSA-9013106	RHOC GTPase cycle	-0.185156	-0.124915	-0.0338141	-0.200023	-0.195732	-0.169038
R-HSA-611105	Respiratory electron transport	-0.202027	-0.220455	-0.00629513	-0.20526	-0.162698	-0.182528
R-HSA-9865881	Complex III assembly	-0.176219	-0.236696	-0.0836986	-0.238177	-0.104517	-0.125318
R-HSA-202427	Phosphorylation of CD3 and TCR zeta chains	-0.280902	-0.0647756	-0.0260777	-0.36313	-0.280754	-0.0919177
R-HSA-202430	Translocation of ZAP-70 to Immunological synapse	-0.223769	-0.192608	0.0529699320210376	-0.353954	-0.280092	-0.0815994
R-HSA-202433	Generation of second messenger molecules	-0.10282	-0.0593413	0.00206875615651533	-0.141833	-0.117772	0.0308947840824081
R-HSA-389948	Co-inhibition by PD-1	-0.122032	-0.0713384	-0.0434262	-0.226274	-0.161973	-0.0491992
R-HSA-6805567	Keratinization	-0.101972	-0.00186827	0.0888720072316061	-0.105721	-0.0850726	-0.1049
R-HSA-6809371	Formation of the cornified envelope	-0.0644614	0.0314066633707425	0.049297553576221	-0.0729127	-0.0474124	-0.0828941
R-HSA-9816359	Maternal to zygotic transition (MZT)	-0.234433	-0.264431	-0.0581437	-0.325055	-0.305843	-0.210599
R-HSA-9819196	Zygotic genome activation (ZGA)	-0.193819	-0.178706	-0.0710399	-0.231869	-0.271542	-0.186407
R-HSA-5620924	Intraflagellar transport	-0.17714	-0.144989	-0.0644885	-0.208895	-0.132878	-0.149075
R-HSA-8852135	Protein ubiquitination	-0.24975	-0.190551	-0.0654663	-0.255781	-0.217002	-0.209719
R-HSA-8866654	E3 ubiquitin ligases ubiquitinate target proteins	-0.249329	-0.192865	-0.041914	-0.271444	-0.222531	-0.208725
R-HSA-6791312	TP53 Regulates Transcription of Cell Cycle Genes	-0.173933	-0.268772	-0.0643409	-0.303347	-0.295088	-0.18537
R-HSA-6804116	TP53 Regulates Transcription of Genes Involved in G1 Cell Cycle Arrest	-0.229503	-0.218992	-0.117676	-0.243623	-0.262794	-0.239274
R-HSA-8866652	Synthesis of active ubiquitin: roles of E1 and E2 enzymes	-0.254531	-0.241899	-0.163442	-0.27948	-0.206798	-0.242728
R-HSA-9845576	Glycosphingolipid transport	-0.0921728	-0.166208	-0.150792	-0.081713	-0.11699	-0.104869
R-HSA-1989781	PPARA activates gene expression	-0.228597	-0.1354	-0.118431	-0.216588	-0.210742	-0.209058
R-HSA-381340	Transcriptional regulation of white adipocyte differentiation	-0.27782	-0.165711	-0.157256	-0.271234	-0.268991	-0.260863
R-HSA-400206	Regulation of lipid metabolism by PPARalpha	-0.231695	-0.139911	-0.114187	-0.220132	-0.214645	-0.212509
R-HSA-9696270	RND2 GTPase cycle	-0.120464	0.0346117218539076	0.0143329207358562	-0.106917	-0.119737	-0.110235
R-HSA-437239	Recycling pathway of L1	-0.27157	-0.174457	-0.0267247	-0.276015	-0.254572	-0.160482
R-HSA-189200	Cellular hexose transport	-0.122892	0.0786031695481582	0.0425378978789869	0.0140692105523456	0.100625274539029	-0.131687
R-HSA-425407	SLC-mediated transmembrane transport	-0.0856322	-0.0210816	-0.0461545	-0.056725	-0.00361116	-0.0949366
R-HSA-9864848	Complex IV assembly	-0.34	-0.430174	0.20323979407422	-0.438529	-0.392681	-0.32819
R-HSA-9926550	Regulation of MITF-M-dependent genes involved in extracellular matrix, focal adhesion and epithelial-to-mesenchymal transition	-0.33159	-0.0579444	-0.114785	-0.285021	-0.239988	-0.337268
R-HSA-169911	Regulation of Apoptosis	-0.216648	-0.216794	-0.0678382	-0.237587	-0.221656	-0.207
R-HSA-211728	Regulation of PAK-2p34 activity by PS-GAP/RHG10	-0.046217	-0.0717453	0.222475917763958	-0.017006	-0.0381464	-0.0593072
R-HSA-8980692	RHOA GTPase cycle	-0.209485	-0.158805	-0.0472	-0.202904	-0.183572	-0.195363
R-HSA-9013148	CDC42 GTPase cycle	-0.236285	-0.149173	-0.0583746	-0.206725	-0.209159	-0.179916
R-HSA-9013149	RAC1 GTPase cycle	-0.235672	-0.152352	-0.0633709	-0.220194	-0.226199	-0.192835
R-HSA-2672351	Stimuli-sensing channels	-0.234141	-0.211484	-0.123393	-0.293014	-0.245657	-0.228375
R-HSA-983712	Ion channel transport	-0.213073	-0.207791	-0.123032	-0.265995	-0.215841	-0.2055
R-HSA-193648	NRAGE signals death through JNK	-0.19879	-0.159813	-0.00424172	-0.236607	-0.207218	-0.174668
R-HSA-204998	Cell death signalling via NRAGE, NRIF and NADE	-0.175511	-0.15038	-0.106542	-0.184049	-0.147022	-0.169284
R-HSA-416482	G alpha (12/13) signalling events	-0.204116	-0.137166	-0.0266072	-0.25162	-0.229094	-0.257293
R-HSA-6799198	Complex I biogenesis	-0.20182	-0.186166	-0.0403403	-0.1592	-0.132277	-0.187548
R-HSA-1221632	Meiotic synapsis	-0.181324	-0.239978	-0.0694576	-0.260541	-0.223749	-0.15755
R-HSA-1474165	Reproduction	-0.134178	-0.154173	-0.0491166	-0.18769	-0.14906	-0.113685
R-HSA-1500620	Meiosis	-0.15073	-0.199174	-0.0550345	-0.210615	-0.175862	-0.125288
R-HSA-9013408	RHOG GTPase cycle	-0.283591	-0.163672	-0.0654929	-0.268279	-0.260362	-0.255922
R-HSA-75105	Fatty acyl-CoA biosynthesis	-0.160025	-0.108082	-0.104738	-0.13111	-0.0775994	-0.155741
R-HSA-75876	Synthesis of very long-chain fatty acyl-CoAs	-0.21233	-0.0841259	-0.0680796	-0.17133	-0.129591	-0.199232
R-HSA-8978868	Fatty acid metabolism	-0.0846476	-0.0256814	-0.0289772	-0.0652282	-0.0576911	-0.0914902
R-HSA-3000471	Scavenging by Class B Receptors	-0.425204	0.000177866713114372	-0.0672303	-0.379354	-0.271725	-0.371158
R-HSA-9842860	Regulation of endogenous retroelements	-0.139372	-0.121907	-0.0874146	-0.154081	-0.149446	-0.106741
R-HSA-9843940	Regulation of endogenous retroelements by KRAB-ZFP proteins	-0.123679	-0.13868	-0.0817571	-0.177573	-0.16837	-0.0990067
R-HSA-6811434	COPI-dependent Golgi-to-ER retrograde traffic	-0.250298	-0.145713	-0.110397	-0.214034	-0.190019	-0.221126
R-HSA-6811442	Intra-Golgi and retrograde Golgi-to-ER traffic	-0.243404	-0.181839	-0.13508	-0.228764	-0.203722	-0.239954
R-HSA-8856688	Golgi-to-ER retrograde transport	-0.2633	-0.188538	-0.144674	-0.24575	-0.210224	-0.233492
R-HSA-71064	Lysine catabolism	-0.054969	0.0271128835641987	0.0189397812456881	-0.0211511	0.00348786965263326	-0.0175259
R-HSA-6782315	tRNA modification in the nucleus and cytosol	-0.111368	-0.276342	-0.0846686	-0.20409	-0.175416	-0.0879367
R-HSA-6782861	Synthesis of wybutosine at G37 of tRNA(Phe)	-0.234571	-0.190275	-0.00770868	-0.187101	-0.215115	-0.144096
R-HSA-72306	tRNA processing	-0.233179	-0.239863	-0.170418	-0.259413	-0.227641	-0.233547
R-HSA-8876198	RAB GEFs exchange GTP for GDP on RABs	-0.13187	-0.125196	-0.147626	-0.163418	-0.125799	-0.142297
R-HSA-9007101	Rab regulation of trafficking	-0.172418	-0.140009	-0.169065	-0.18063	-0.150769	-0.168811
R-HSA-446193	Biosynthesis of the N-glycan precursor (dolichol lipid-linked oligosaccharide, LLO) and transfer to a nascent protein	-0.0620609	0.000591672703106727	-0.0151328	-0.0701986	-0.0187461	-0.0832324
R-HSA-446219	Synthesis of substrates in N-glycan biosythesis	-0.134296	-0.033963	-0.0661193	-0.164321	-0.109262	-0.15788
R-HSA-6787639	GDP-fucose biosynthesis	-0.0278007	0.327281541214352	-0.256163	0.0481745874421168	0.0137747407524085	-0.0400986
R-HSA-5173105	O-linked glycosylation	0.00167004606860327	0.0909631891909947	0.00078981130421435	0.028353511129863	0.0278060815462043	0.011789600204961
R-HSA-5173214	O-glycosylation of TSR domain-containing proteins	-0.0279421	0.240890414727793	0.103942520586546	0.028960031933516	-0.000146053	0.0225921988667546
R-HSA-381753	Olfactory Signaling Pathway	0.0299681165968263	0.0552896815299081	0.0740996677076425	-0.0901431	0.0342172011081053	-0.141484
R-HSA-9752946	Expression and translocation of olfactory receptors	0.0482205904273831	-0.0247265	-0.0016954	-0.0913217	0.00637744516446095	-0.142592
R-HSA-8931838	DAG1 glycosylations	0.0276979399878461	0.120701479841737	0.0838322476322937	0.0320075063872979	0.0414723583265193	0.035685203147982
R-HSA-9939291	Matriglycan biosynthesis on DAG1	0.0209242812018383	0.0947828998154434	0.0532761185762774	0.0126198406923709	0.0559638338419225	0.011585124191727
R-HSA-8873719	RAB geranylgeranylation	-0.0792174	-0.0176839	-0.0901722	-0.042772	-0.0721922	-0.0642825
R-HSA-5685942	HDR through Homologous Recombination (HRR)	-0.164634	-0.175491	-0.0734263	-0.194044	-0.182335	-0.12592
R-HSA-5693537	Resolution of D-Loop Structures	-0.153925	-0.156353	-0.0771428	-0.161079	-0.167284	-0.104893
R-HSA-5693568	Resolution of D-loop Structures through Holliday Junction Intermediates	-0.153925	-0.156353	-0.0771428	-0.161079	-0.167284	-0.104893
R-HSA-6783310	Fanconi Anemia Pathway	-0.16243	-0.129226	-0.0477885	-0.163407	-0.137877	-0.139051
R-HSA-9659379	Sensory processing of sound	-0.128041	-0.117358	0.035087430417314	-0.122414	-0.127592	-0.0798375
R-HSA-9662360	Sensory processing of sound by inner hair cells of the cochlea	-0.159455	-0.125732	0.0175437607418621	-0.141051	-0.173158	-0.105635
R-HSA-9662361	Sensory processing of sound by outer hair cells of the cochlea	-0.121284	-0.125148	0.0935329324626656	-0.129312	-0.155355	-0.0793698
R-HSA-8964572	Lipid particle organization	0.142812605814956	0.112063787588899	0.103869088318604	0.132109099392425	0.123981383649974	0.119638521196017
R-HSA-917729	Endosomal Sorting Complex Required For Transport (ESCRT)	-0.203008	-0.180169	-0.0656804	-0.203859	-0.188727	-0.173208
R-HSA-9907900	Proteasome assembly	-0.161468	-0.165625	-0.0428229	-0.191135	-0.16244	-0.162934
R-HSA-418597	G alpha (z) signalling events	-0.239752	-0.129604	-0.0234447	-0.311546	-0.262719	-0.123023
R-HSA-429914	Deadenylation-dependent mRNA decay	-0.226282	-0.375155	0.0127615328145542	-0.434254	-0.384876	-0.232111
R-HSA-429947	Deadenylation of mRNA	-0.256721	-0.379583	-0.00736002	-0.452794	-0.437313	-0.260488
R-HSA-6804115	TP53 regulates transcription of additional cell cycle genes whose exact role in the p53 pathway remain uncertain	-0.123581	-0.340659	-0.0460884	-0.346702	-0.345683	-0.139723
R-HSA-9820841	M-decay: degradation of maternal mRNAs by maternally stored factors	-0.292661	-0.381313	-0.0353414	-0.445873	-0.422777	-0.276096
R-HSA-70921	Histidine catabolism	0.208930968754024	0.291543953985465	0.0950198607012371	0.266872365890744	0.303746476176739	0.19652771921603
R-HSA-74158	RNA Polymerase III Transcription	-0.174711	-0.190134	-0.0544383	-0.210216	-0.190824	-0.170261
R-HSA-749476	RNA Polymerase III Abortive And Retractive Initiation	-0.174711	-0.190134	-0.0544383	-0.210216	-0.190824	-0.170261
R-HSA-76046	RNA Polymerase III Transcription Initiation	-0.18145	-0.188257	-0.0433621	-0.184263	-0.19322	-0.168371
R-HSA-76061	RNA Polymerase III Transcription Initiation From Type 1 Promoter	-0.177902	-0.196551	-0.0299828	-0.184765	-0.192984	-0.16277
R-HSA-76066	RNA Polymerase III Transcription Initiation From Type 2 Promoter	-0.172026	-0.191364	-0.0382238	-0.179494	-0.187615	-0.157359
R-HSA-76071	RNA Polymerase III Transcription Initiation From Type 3 Promoter	-0.170878	-0.165651	-0.0698556	-0.161052	-0.16948	-0.168218
R-HSA-163125	Post-translational modification: synthesis of GPI-anchored proteins	0.0884037797926429	0.248926533103301	0.0338717440157001	0.10888288247057	0.100607049264091	0.0774492194155417
R-HSA-1483206	Glycerophospholipid biosynthesis	-0.137421	-0.167189	-0.0570756	-0.199053	-0.18914	-0.129653
R-HSA-163841	Gamma carboxylation, hypusinylation, hydroxylation, and arylsulfatase activation	-0.0934229	-0.272314	-0.0209394	-0.381425	-0.389538	-0.124333
R-HSA-9629569	Protein hydroxylation	-0.0384454	-0.378926	-0.0215641	-0.437965	-0.43559	-0.0817531
R-HSA-163560	Triglyceride catabolism	-0.208893	-0.212037	-0.0775317	-0.275154	-0.232769	-0.195328
R-HSA-8979227	Triglyceride metabolism	-0.209045	-0.217969	-0.0457314	-0.262771	-0.238875	-0.20628
R-HSA-9634815	Transcriptional Regulation by NPAS4	-0.112657	-0.123842	-0.0680318	-0.197875	-0.20858	-0.10033
R-HSA-9768919	NPAS4 regulates expression of target genes	-0.0766011	-0.0815155	-0.0528617	-0.14008	-0.172231	-0.0571225
R-HSA-1660661	Sphingolipid de novo biosynthesis	-0.0564828	0.0214664162448616	0.0331528338475375	-0.0638021	0.0783298922801343	-0.0332823
R-HSA-428157	Sphingolipid metabolism	-0.12808	0.017772365790703	0.000853554331420148	-0.110299	-0.0333387	-0.116763
R-HSA-71403	Citric acid cycle (TCA cycle)	-0.17312	-0.153861	-0.12202	-0.176392	-0.0863759	-0.207152
R-HSA-9854311	Maturation of TCA enzymes and regulation of TCA cycle	-0.179081	-0.180717	-0.196692	-0.228078	-0.103263	-0.290129
R-HSA-5663213	RHO GTPases Activate WASPs and WAVEs	-0.274647	-0.241887	-0.0393959	-0.290914	-0.27528	-0.175722
R-HSA-156580	Phase II - Conjugation of compounds	-0.0947918	0.0204888315321052	-0.0746083	-0.0887467	-0.0250579	-0.0705633
R-HSA-156590	Glutathione conjugation	-0.0689672	0.0677017643150645	0.0455239586707211	-0.0282681	0.089920061065385	-0.0786261
R-HSA-174403	Glutathione synthesis and recycling	0.0935743110561021	0.2057417835303	-0.102674	0.157389830288951	0.127405700986486	0.0833576598730261
R-HSA-211859	Biological oxidations	-0.0627222	0.017396940425992	-0.105247	-0.0558293	-0.00334138	-0.0546755
R-HSA-5423646	Aflatoxin activation and detoxification	0.0506860690034877	0.202156280706641	-0.110326	0.124381088897764	0.156151476562147	0.0373820160097728
R-HSA-9748784	Drug ADME	-0.133238	-0.08555	0.0213492675358313	-0.125768	-0.00791733	-0.0855402
R-HSA-9753281	Paracetamol ADME	0.149761355109921	0.265914645356868	0.0720462279713585	0.086341747098881	0.299649136759806	0.141429845859989
R-HSA-977347	Serine metabolism	0.0878067443174095	0.367819843156968	0.118414214239988	0.0750045138360633	0.184884543011586	0.00254901736092825
R-HSA-1474228	Degradation of the extracellular matrix	-0.187771	0.138282295945559	-0.062593	-0.13677	-0.114954	-0.162672
R-HSA-157858	Gap junction trafficking and regulation	-0.188456	-0.139312	-0.0195909	-0.217012	-0.180769	-0.134616
R-HSA-190828	Gap junction trafficking	-0.183341	-0.125365	-0.00905333	-0.207257	-0.166214	-0.124226
R-HSA-190840	Microtubule-dependent trafficking of connexons from Golgi to the plasma membrane	-0.240033	0.0873397727462443	-0.0252474	-0.257955	-0.0891057	-0.16356
R-HSA-190861	Gap junction assembly	-0.0787902	0.0427592015635282	0.00543679776204353	-0.153911	-0.0851744	-0.0759343
R-HSA-190872	Transport of connexons to the plasma membrane	-0.148672	0.105817107204625	-0.00859964	-0.152115	-0.0212484	-0.0859412
R-HSA-2132295	MHC class II antigen presentation	-0.269645	-0.207157	-0.125396	-0.275949	-0.248081	-0.241096
R-HSA-2500257	Resolution of Sister Chromatid Cohesion	-0.217411	-0.175618	-0.18905	-0.221931	-0.186718	-0.208263
R-HSA-2995410	Nuclear Envelope (NE) Reassembly	-0.26412	-0.186569	-0.201865	-0.262274	-0.215305	-0.252064
R-HSA-3371497	HSP90 chaperone cycle for steroid hormone receptors (SHR) in the presence of ligand	-0.205223	-0.121991	-0.106116	-0.180776	-0.151388	-0.181127
R-HSA-380320	Recruitment of NuMA to mitotic centrosomes	-0.214894	-0.156307	-0.150399	-0.210231	-0.172467	-0.200881
R-HSA-389958	Cooperation of Prefoldin and TriC/CCT in actin and tubulin folding	-0.269102	-0.198674	-0.0556581	-0.259526	-0.21955	-0.18038
R-HSA-389960	Formation of tubulin folding intermediates by CCT/TriC	-0.263869	-0.113772	-0.15019	-0.253361	-0.142189	-0.225768
R-HSA-389977	Post-chaperonin tubulin folding pathway	-0.310247	0.00277513807054336	-0.0157107	-0.320952	-0.129383	-0.203997
R-HSA-390466	Chaperonin-mediated protein folding	-0.257919	-0.220793	-0.105942	-0.283483	-0.276175	-0.226588
R-HSA-391251	Protein folding	-0.255451	-0.220064	-0.104809	-0.279385	-0.268051	-0.224879
R-HSA-5626467	RHO GTPases activate IQGAPs	-0.267437	-0.157131	-0.0261623	-0.26759	-0.228572	-0.176957
R-HSA-6807878	COPI-mediated anterograde transport	-0.206386	-0.131571	-0.101575	-0.185396	-0.14299	-0.204916
R-HSA-6811436	COPI-independent Golgi-to-ER retrograde traffic	-0.280432	-0.193848	-0.164327	-0.27626	-0.198826	-0.243009
R-HSA-8955332	Carboxyterminal post-translational modifications of tubulin	-0.134669	0.0839344836570249	0.0925899726779736	-0.201029	-0.0675086	-0.0490685
R-HSA-9609736	Assembly and cell surface presentation of NMDA receptors	0.0561568731944619	0.0755988127098556	0.0648923637015765	0.0273624957223947	0.053952290964004	0.0703212088335297
R-HSA-9619483	Activation of AMPK downstream of NMDARs	-0.205208	-0.40923	0.173915069693432	-0.569092	-0.560289	-0.215868
R-HSA-9648025	EML4 and NUDC in mitotic spindle formation	-0.217829	-0.181097	-0.1648	-0.228355	-0.189743	-0.200283
R-HSA-9668328	Sealing of the nuclear envelope (NE) by ESCRT-III	-0.279771	-0.0802962	-0.0865309	-0.265578	-0.156906	-0.251029
R-HSA-983189	Kinesins	-0.101597	-0.0263059	-0.0313999	-0.0833389	-0.0315956	-0.0448541
R-HSA-9639288	Amino acids regulate mTORC1	-0.16901	-0.172728	-0.0723318	-0.19535	-0.14831	-0.162487
R-HSA-9711097	Cellular response to starvation	-0.0667518	-0.288351	0.0374230186515282	-0.363507	-0.322486	-0.0768005
R-HSA-9793380	Formation of paraxial mesoderm	-0.247304	-0.189136	-0.0898756	-0.26133	-0.246405	-0.235949
R-HSA-9824272	Somitogenesis	-0.230867	-0.213305	-0.0881569	-0.236256	-0.214434	-0.211495
R-HSA-9013404	RAC2 GTPase cycle	-0.234514	-0.139589	-0.0566669	-0.212062	-0.211053	-0.191941
R-HSA-9013423	RAC3 GTPase cycle	-0.2224	-0.106208	-0.0520063	-0.200272	-0.212318	-0.188267
R-HSA-5620920	Cargo trafficking to the periciliary membrane	-0.163928	-0.0997756	-0.155234	-0.135291	-0.100642	-0.125358
R-HSA-5624138	Trafficking of myristoylated proteins to the cilium	-0.207958	-0.22662	-0.115452	-0.20955	-0.118078	-0.214117
R-HSA-1234174	Cellular response to hypoxia	-0.230041	-0.197942	-0.107134	-0.24654	-0.224273	-0.220682
R-HSA-1234176	Oxygen-dependent proline hydroxylation of Hypoxia-inducible Factor Alpha	-0.217857	-0.213071	-0.0996731	-0.243126	-0.217711	-0.215642
R-HSA-9857492	Protein lipoylation	-0.0197292	0.052899371840848	0.0444525624883539	-0.00184378	-0.0228482	-0.00243504
R-HSA-2172127	DAP12 interactions	-0.209866	-0.121412	-0.0729649	-0.194881	-0.191005	-0.0979598
R-HSA-1442490	Collagen degradation	-0.276325	0.256816087389608	-0.0678458	-0.220552	-0.176722	-0.247594
R-HSA-1474290	Collagen formation	-0.192129	0.189198704283896	0.0328331262191818	-0.143848	-0.131108	-0.161066
R-HSA-1650814	Collagen biosynthesis and modifying enzymes	-0.130209	0.141153809467575	0.0477764087607789	-0.0855259	-0.11265	-0.10469
R-HSA-186797	Signaling by PDGF	-0.122806	0.00661615325958281	-0.0893599	-0.119932	-0.125334	-0.114056
R-HSA-2022090	Assembly of collagen fibrils and other multimeric structures	-0.285495	0.322240433691585	-0.0280012	-0.232229	-0.194858	-0.273687
R-HSA-216083	Integrin cell surface interactions	-0.194524	-0.0989184	-0.0128023	-0.294274	-0.272114	-0.1966
R-HSA-3000178	ECM proteoglycans	-0.30375	0.06964476124407	-0.0681801	-0.290907	-0.27247	-0.267238
R-HSA-375165	NCAM signaling for neurite out-growth	-0.260922	-0.0398251	-0.184032	-0.226878	-0.231247	-0.193313
R-HSA-419037	NCAM1 interactions	-0.0204645	0.391294974662267	-0.0288394	0.0367600003506588	-0.0366613	-0.0767313
R-HSA-8948216	Collagen chain trimerization	-0.243563	0.333266419619777	-0.0350031	-0.181096	-0.209515	-0.256758
R-HSA-70171	Glycolysis	-0.269381	-0.205624	-0.15061	-0.274786	-0.239109	-0.231346
R-HSA-70263	Gluconeogenesis	-0.186225	-0.0991545	0.0391632813579341	-0.210751	-0.188083	-0.125319
R-HSA-70326	Glucose metabolism	-0.254242	-0.207276	-0.147992	-0.271365	-0.231673	-0.237286
R-HSA-9013026	RHOB GTPase cycle	-0.139663	-0.0640259	-0.042449	-0.127356	-0.11502	-0.109443
R-HSA-9013405	RHOD GTPase cycle	-0.218154	-0.139216	-0.0776401	-0.208191	-0.203376	-0.200014
R-HSA-9013409	RHOJ GTPase cycle	-0.215913	-0.156667	-0.113791	-0.195892	-0.180191	-0.176186
R-HSA-9035034	RHOF GTPase cycle	-0.217866	-0.151197	-0.0408622	-0.22304	-0.227501	-0.18274
R-HSA-9768727	Regulation of CDH1 posttranslational processing and trafficking to plasma membrane	-0.218528	-0.153035	-0.0684888	-0.279255	-0.265939	-0.221994
R-HSA-5358346	Hedgehog ligand biogenesis	-0.230096	-0.195307	-0.0751928	-0.248597	-0.23681	-0.217901
R-HSA-5362798	Release of Hh-Np from the secreting cell	-0.219051	0.222637890901783	-0.241096	-0.160155	-0.189346	-0.22923
R-HSA-1169408	ISG15 antiviral mechanism	-0.271559	-0.242852	-0.178569	-0.30121	-0.288738	-0.278939
R-HSA-159227	Transport of the SLBP independent Mature mRNA	-0.281796	-0.197602	-0.170857	-0.297302	-0.296141	-0.283516
R-HSA-159230	Transport of the SLBP Dependant Mature mRNA	-0.275554	-0.19582	-0.173417	-0.290053	-0.289464	-0.278062
R-HSA-159231	Transport of Mature mRNA Derived from an Intronless Transcript	-0.279256	-0.213003	-0.181233	-0.304082	-0.290282	-0.288853
R-HSA-159234	Transport of Mature mRNAs Derived from Intronless Transcripts	-0.273324	-0.210489	-0.183444	-0.29696	-0.284243	-0.283081
R-HSA-159236	Transport of Mature mRNA derived from an Intron-Containing Transcript	-0.336846	-0.28855	-0.151541	-0.361008	-0.347937	-0.331963
R-HSA-170822	Regulation of Glucokinase by Glucokinase Regulatory Protein	-0.287124	-0.181189	-0.169683	-0.269475	-0.274689	-0.300929
R-HSA-191859	snRNP Assembly	-0.341804	-0.302737	-0.138349	-0.353762	-0.369643	-0.345716
R-HSA-194441	Metabolism of non-coding RNA	-0.341804	-0.302737	-0.138349	-0.353762	-0.369643	-0.345716
R-HSA-211000	Gene Silencing by RNA	-0.206324	-0.238432	-0.116256	-0.289483	-0.246099	-0.182579
R-HSA-2980766	Nuclear Envelope Breakdown	-0.260911	-0.184388	-0.146141	-0.282245	-0.272423	-0.230478
R-HSA-3108214	SUMOylation of DNA damage response and repair proteins	-0.222835	-0.198911	-0.129617	-0.259584	-0.242787	-0.229895
R-HSA-3232142	SUMOylation of ubiquitinylation proteins	-0.132879	-0.153496	-0.0709742	-0.181318	-0.189818	-0.119876
R-HSA-3301854	Nuclear Pore Complex (NPC) Disassembly	-0.307731	-0.1668	-0.170354	-0.310849	-0.300072	-0.299303
R-HSA-3371453	Regulation of HSF1-mediated heat shock response	-0.142966	-0.0605991	-0.112147	-0.11095	-0.0862071	-0.114868
R-HSA-4085377	SUMOylation of SUMOylation proteins	-0.245727	-0.148493	-0.205122	-0.234171	-0.235562	-0.249418
R-HSA-4551638	SUMOylation of chromatin organization proteins	-0.241634	-0.206358	-0.168036	-0.235562	-0.253376	-0.236773
R-HSA-4570464	SUMOylation of RNA binding proteins	-0.358595	-0.242848	-0.196755	-0.350841	-0.329293	-0.356956
R-HSA-4615885	SUMOylation of DNA replication proteins	-0.2612	-0.209325	-0.124745	-0.294366	-0.255166	-0.251739
R-HSA-5578749	Transcriptional regulation by small RNAs	-0.226826	-0.250206	-0.109955	-0.317886	-0.267909	-0.220743
R-HSA-6784531	tRNA processing in the nucleus	-0.299375	-0.226562	-0.191459	-0.295062	-0.257654	-0.301521
R-HSA-72202	Transport of Mature Transcript to Cytoplasm	-0.328812	-0.291847	-0.16294	-0.361825	-0.345022	-0.329025
R-HSA-5632684	Hedgehog 'on' state	-0.211802	-0.19501	-0.0584471	-0.226355	-0.212288	-0.190541
R-HSA-5635838	Activation of SMO	-0.166981	-0.16195	-0.0268648	-0.159217	-0.142997	-0.176072
R-HSA-380259	Loss of Nlp from mitotic centrosomes	-0.215658	-0.155383	-0.154179	-0.217614	-0.17653	-0.200813
R-HSA-380270	Recruitment of mitotic centrosome proteins and complexes	-0.217807	-0.16105	-0.149673	-0.218616	-0.175925	-0.203421
R-HSA-380284	Loss of proteins required for interphase microtubule organization from the centrosome	-0.215658	-0.155383	-0.154179	-0.217614	-0.17653	-0.200813
R-HSA-380287	Centrosome maturation	-0.217807	-0.16105	-0.149673	-0.218616	-0.175925	-0.203421
R-HSA-8854518	AURKA Activation by TPX2	-0.212701	-0.154079	-0.15436	-0.213054	-0.173906	-0.19897
R-HSA-977443	GABA receptor activation	-0.133253	-0.0390641	0.0156853345421383	-0.138807	-0.0540838	-0.127637
R-HSA-1980145	Signaling by NOTCH2	-0.0752743	-0.0157466	0.00345873202100788	-0.107708	-0.077383	-0.0332625
R-HSA-2122948	Activated NOTCH1 Transmits Signal to the Nucleus	-0.279398	-0.228202	-0.117735	-0.310812	-0.28689	-0.231891
R-HSA-2979096	NOTCH2 Activation and Transmission of Signal to the Nucleus	-0.0367666	0.00238940211329922	0.0113682962211002	-0.075261	-0.0365863	-0.00568419
R-HSA-9012852	Signaling by NOTCH3	-0.33837	-0.217316	-0.109789	-0.378094	-0.33287	-0.303117
R-HSA-9013507	NOTCH3 Activation and Transmission of Signal to the Nucleus	-0.3441	-0.21844	-0.0907639	-0.393496	-0.343479	-0.310116
R-HSA-606279	Deposition of new CENPA-containing nucleosomes at the centromere	-0.0708176	-0.257497	0.00476284087377599	-0.284544	-0.265302	-0.105991
R-HSA-774815	Nucleosome assembly	-0.0708176	-0.257497	0.00476284087377599	-0.284544	-0.265302	-0.105991
R-HSA-111885	Opioid Signalling	-0.254977	-0.192018	-0.175236	-0.264314	-0.238144	-0.182832
R-HSA-112040	G-protein mediated events	-0.253064	-0.151436	-0.145307	-0.288349	-0.262785	-0.147892
R-HSA-170670	Adenylate cyclase inhibitory pathway	0.160530922589153	0.370743332913393	0.31091469812185	-0.0801674	0.125141000275848	-0.0283074
R-HSA-2980736	Peptide hormone metabolism	-0.167361	-0.0916656	-0.115789	-0.14898	-0.137147	-0.140803
R-HSA-381771	Synthesis, secretion, and inactivation of Glucagon-like Peptide-1 (GLP-1)	-0.130908	-0.0863627	0.0335242339390795	-0.162885	-0.150696	-0.162678
R-HSA-392170	ADP signalling through P2Y purinoceptor 12	-0.263323	-0.0820723	0.0844356814999329	-0.275003	-0.208933	-0.253198
R-HSA-392518	Signal amplification	-0.189942	-0.185722	0.0570457564211333	-0.250414	-0.182186	-0.210552
R-HSA-400508	Incretin synthesis, secretion, and inactivation	-0.131845	-0.0932662	0.0159052485932827	-0.158838	-0.148806	-0.163876
R-HSA-418555	G alpha (s) signalling events	-0.150007	0.0458820865648808	-0.0203637	-0.125661	-0.122064	-0.0898715
R-HSA-9634597	GPER1 signaling	-0.283289	0.072201368782881	-0.0865919	-0.290831	-0.249286	-0.210984
R-HSA-9717189	Sensory perception of taste	0.0858061422815537	0.261700924120287	0.268058330104607	0.106460925891363	0.123122469737412	0.10039362612725
R-HSA-9717207	Sensory perception of sweet, bitter, and umami (glutamate) taste	0.114209885906837	0.262614597397893	0.218273476525931	0.12323155160571	0.151836768615645	0.136192828467368
R-HSA-977444	GABA B receptor activation	-0.178383	0.00686174735352718	0.150926772803818	-0.172697	-0.0679725	-0.168026
R-HSA-991365	Activation of GABAB receptors	-0.178383	0.00686174735352718	0.150926772803818	-0.172697	-0.0679725	-0.168026
R-HSA-9796292	Formation of axial mesoderm	-0.147712	-0.0332087	-0.00628719	-0.160318	-0.139625	-0.119761
R-HSA-5620922	BBSome-mediated cargo-targeting to cilium	-0.272848	-0.0642816	-0.106899	-0.2456	-0.225259	-0.232253
R-HSA-9707564	Cytoprotection by HMOX1	-0.298384	-0.220463	-0.0723471	-0.353278	-0.26197	-0.309924
R-HSA-9772755	Formation of WDR5-containing histone-modifying complexes	-0.118244	-0.139747	-0.180408	-0.118031	-0.128879	-0.122279
R-HSA-1461957	Beta defensins	-0.0911575	-0.10648	-0.0192379	-0.103739	0.00607533431280255	-0.0738231
R-HSA-1461973	Defensins	-0.188684	-0.0390786	0.0924724742800991	-0.252857	-0.252318	-0.17021
R-HSA-6803157	Antimicrobial peptides	-0.212407	-0.105686	0.0692672703679974	-0.153495	-0.230168	-0.157352
R-HSA-390918	Peroxisomal lipid metabolism	0.0135334830584831	-0.0513554	-0.0336944	0.0321486975242322	0.00387322648895433	0.0335308571418125
R-HSA-9033241	Peroxisomal protein import	-0.235727	-0.212876	-0.123168	-0.239997	-0.219197	-0.212327
R-HSA-1187000	Fertilization	0.0722053677695048	0.249702325962847	0.0692011929550488	0.131171380919083	0.181358089110059	0.119325945521443
R-HSA-1300642	Sperm Motility And Taxes	0.374740378163486	0.318492211480572	0.216989731396837	0.413567935381372	0.392419907686671	0.365600371484145
R-HSA-198693	AKT phosphorylates targets in the nucleus	-0.219983	-0.229514	-0.106272	-0.34078	-0.30856	-0.237927
R-HSA-9614399	Regulation of localization of FOXO transcription factors	-0.153342	-0.0826743	-0.0780372	-0.2035	-0.172235	-0.154659
R-HSA-9615017	FOXO-mediated transcription of oxidative stress, metabolic and neuronal genes	-0.228984	-0.145497	-0.167417	-0.229813	-0.228412	-0.198505
R-HSA-211897	Cytochrome P450 - arranged by substrate type	-0.0727196	-0.0727519	-0.161457	-0.0671491	-0.0845799	-0.0704395
R-HSA-211945	Phase I - Functionalization of compounds	-0.0305132	0.0176436329422144	-0.0988665	-0.028789	0.0194046710209194	-0.0322387
R-HSA-211976	Endogenous sterols	-0.103072	-0.030908	-0.0927656	-0.116485	-0.142714	-0.0705774
R-HSA-211981	Xenobiotics	-0.141287	-0.118211	-0.227921	-0.107672	-0.11124	-0.123952
R-HSA-8937144	Aryl hydrocarbon receptor signalling	-0.0768484	-0.0154603	-0.0932741	-0.064887	-0.0299666	-0.0175231
R-HSA-8983711	OAS antiviral response	-0.182454	-0.109268	-0.163563	-0.283257	-0.15894	-0.230138
R-HSA-9013424	RHOV GTPase cycle	-0.102068	-0.0701427	0.00582896344268827	-0.133193	-0.151319	-0.0794792
R-HSA-9764560	Regulation of CDH1 Gene Transcription	-0.234868	-0.232517	-0.115952	-0.285932	-0.247548	-0.21132
R-HSA-9764725	Negative Regulation of CDH1 Gene Transcription	-0.227518	-0.227228	-0.112972	-0.291273	-0.250537	-0.199615
R-HSA-193144	Estrogen biosynthesis	-0.131336	-0.237489	0.0206689311469249	-0.113169	-0.0884538	-0.189521
R-HSA-196071	Metabolism of steroid hormones	-0.0707561	-0.0701654	-0.0253698	-0.0111044	-0.0440337	-0.116841
R-HSA-8957322	Metabolism of steroids	-0.161678	-0.115359	-0.102951	-0.144655	-0.12758	-0.17209
R-HSA-9845323	Regulation of endogenous retroelements by Piwi-interacting RNAs (piRNAs)	-0.206853	-0.180621	-0.0696662	-0.253763	-0.239802	-0.167428
R-HSA-432720	Lysosome Vesicle Biogenesis	-0.275156	-0.0984571	-0.0554461	-0.248093	-0.221893	-0.231232
R-HSA-75896	Plasmalogen biosynthesis	0.149398961401657	0.122869607619856	0.0470539083702115	0.199479316586448	0.465338949445268	0.14250526910805
R-HSA-8848584	Wax and plasmalogen biosynthesis	0.0958491246338781	0.0735540855298766	-0.0419833	0.14863199031472	0.299788698602385	0.0898984724779373
R-HSA-9033500	TYSND1 cleaves peroxisomal proteins	-0.0292189	-0.0892114	0.0866350359259416	-0.0838613	-0.00646008	0.0572362376952853
R-HSA-141424	Amplification of signal from the kinetochores	-0.203324	-0.179316	-0.174032	-0.215891	-0.184279	-0.195325
R-HSA-141444	Amplification of signal from unattached kinetochores via a MAD2 inhibitory signal	-0.203324	-0.179316	-0.174032	-0.215891	-0.184279	-0.195325
R-HSA-69618	Mitotic Spindle Checkpoint	-0.206922	-0.19187	-0.171151	-0.221316	-0.182789	-0.200647
R-HSA-198725	Nuclear Events (kinase and transcription factor activation)	-0.19726	-0.147286	-0.163804	-0.199712	-0.199146	-0.183102
R-HSA-6804757	Regulation of TP53 Degradation	-0.177436	-0.162018	-0.118403	-0.230624	-0.217603	-0.15753
R-HSA-6806003	Regulation of TP53 Expression and Degradation	-0.178446	-0.158941	-0.119494	-0.231401	-0.218428	-0.158367
R-HSA-9031628	NGF-stimulated transcription	-0.161709	-0.118158	-0.0949539	-0.146674	-0.15902	-0.153928
R-HSA-15869	Metabolism of nucleotides	-0.297936	-0.112237	-0.0514375	-0.284233	-0.182734	-0.228995
R-HSA-73614	Pyrimidine salvage	-0.289721	-0.14555	0.0192349364701691	-0.18096	-0.180556	-0.220144
R-HSA-8956321	Nucleotide salvage	-0.286275	-0.243982	0.0058642815345098	-0.319727	-0.231894	-0.215318
R-HSA-373080	Class B/2 (Secretin family receptors)	-0.0778038	0.157592612187239	0.0613183688142975	-0.0421478	-0.0174572	-0.00123351
R-HSA-72187	mRNA 3'-end processing	-0.404606	-0.343308	-0.162787	-0.444589	-0.423975	-0.412447
R-HSA-73856	RNA Polymerase II Transcription Termination	-0.392395	-0.347262	-0.163399	-0.424298	-0.411018	-0.402076
R-HSA-77289	Mitochondrial Fatty Acid Beta-Oxidation	-0.107447	-0.0248062	-0.0271453	-0.0725869	-0.0596009	-0.0660101
R-HSA-5250913	Positive epigenetic regulation of rRNA expression	-0.189149	-0.271274	-0.059302	-0.319714	-0.304328	-0.173784
R-HSA-5250924	B-WICH complex positively regulates rRNA expression	-0.161974	-0.278256	-0.0194567	-0.333199	-0.303002	-0.14073
R-HSA-397014	Muscle contraction	-0.14125	-0.00939876	-0.0130689	-0.131737	-0.105541	-0.0825047
R-HSA-5576891	Cardiac conduction	-0.141982	-0.0190477	-0.0646151	-0.132758	-0.105437	-0.0917714
R-HSA-5578775	Ion homeostasis	-0.157933	-0.0269252	-0.0744437	-0.184371	-0.119692	-0.108546
R-HSA-936837	Ion transport by P-type ATPases	-0.244685	-0.0387441	-0.0787507	-0.250006	-0.151902	-0.172304
R-HSA-447115	Interleukin-12 family signaling	-0.267884	-0.264551	-0.0113077	-0.33167	-0.288668	-0.238963
R-HSA-8950505	Gene and protein expression by JAK-STAT signaling after Interleukin-12 stimulation	-0.28435	-0.334342	0.0305963105388344	-0.383874	-0.315436	-0.24813
R-HSA-9020591	Interleukin-12 signaling	-0.27469	-0.285907	0.0258909201720875	-0.356054	-0.298371	-0.238124
R-HSA-1296071	Potassium Channels	-0.038471	0.0843249111032886	0.287539181530558	-0.0369841	-0.0257699	0.00458372534710549
R-HSA-1296346	Tandem pore domain potassium channels	-0.0934842	-0.131606	0.167158144453873	-0.0698004	-0.095934	-0.101686
R-HSA-1299308	Tandem of pore domain in a weak inwardly rectifying K+ channels (TWIK)	-0.143016	-0.20141	-0.347727	-0.0759947	-0.101233	-0.151221
R-HSA-5576886	Phase 4 - resting membrane potential	-0.0217819	0.0479789587480582	0.159420290604338	0.0354607046266299	0.00697171945062003	-0.0316976
R-HSA-451927	Interleukin-2 family signaling	-0.174299	-0.140618	-0.0881473	-0.189895	-0.215063	-0.126523
R-HSA-114516	Disinhibition of SNARE formation	-0.151787	-0.138534	-0.12616	-0.277474	-0.244238	-0.0688309
R-HSA-166662	Lectin pathway of complement activation	-0.540504	0.151814214542795	-0.224665	-0.34477	-0.658249	-0.689175
R-HSA-2855086	Ficolins bind to repetitive carbohydrate structures on the target cell surface	-0.820792	0.197180206089413	-0.386305	-0.250862	-0.788744	-0.823865
R-HSA-114608	Platelet degranulation	-0.288461	-0.0796643	-0.085538	-0.278635	-0.24819	-0.244611
R-HSA-432722	Golgi Associated Vesicle Biogenesis	-0.235526	-0.131848	-0.0792416	-0.194117	-0.153172	-0.209571
R-HSA-156584	Cytosolic sulfonation of small molecules	0.029372262689132	0.257103072349973	0.0778448473882811	0.0836260591766342	0.0552977447647019	0.0908639633881392
R-HSA-140534	Caspase activation via Death Receptors in the presence of ligand	-0.0189852	0.00841298830900966	-0.0137234	0.00406484760595591	0.0200460551045388	-0.0277213
R-HSA-2562578	TRIF-mediated programmed cell death	-0.179032	-0.0983377	0.077090888424889	-0.288474	-0.307486	-0.281694
R-HSA-5357769	Caspase activation via extrinsic apoptotic signalling pathway	-0.0705946	-0.0352437	-0.0629747	-0.0572945	-0.0431434	-0.0714283
R-HSA-5686938	Regulation of TLR by endogenous ligand	-0.276402	-0.163026	0.0254663654829355	-0.289851	-0.258137	-0.327946
R-HSA-936964	Activation of IRF3, IRF7 mediated by TBK1, IKK蔚 (IKBKE)	-0.195421	-0.166099	-0.0936073	-0.208776	-0.165795	-0.156185
R-HSA-937041	IKK complex recruitment mediated by RIP1	-0.214812	-0.179661	-0.160258	-0.2436	-0.208576	-0.213664
R-HSA-937072	TRAF6-mediated induction of TAK1 complex within TLR4 complex	-0.274063	-0.226985	-0.163576	-0.282935	-0.261307	-0.233287
R-HSA-9707616	Heme signaling	-0.280935	-0.15908	-0.166471	-0.276049	-0.212439	-0.288615
R-HSA-975163	IRAK2 mediated activation of TAK1 complex upon TLR7/8 or 9 stimulation	-0.274063	-0.226985	-0.163576	-0.282935	-0.261307	-0.233287
R-HSA-9824878	Regulation of TBK1, IKK蔚 (IKBKE)-mediated activation of IRF3, IRF7	-0.197112	-0.175833	-0.0918515	-0.20764	-0.165874	-0.152839
R-HSA-1630316	Glycosaminoglycan metabolism	-0.103629	0.0318678939378114	-0.0659322	-0.0533742	-0.0454217	-0.066985
R-HSA-2142845	Hyaluronan metabolism	-0.169966	-0.110063	-0.0250256	-0.194495	-0.198281	-0.131502
R-HSA-3371378	Regulation by c-FLIP	-0.0305883	-0.00414621	-0.0305006	-0.0149752	0.013819263676675	-0.0336587
R-HSA-5213460	RIPK1-mediated regulated necrosis	-0.173069	-0.177944	-0.0976627	-0.183447	-0.139109	-0.170317
R-HSA-5218900	CASP8 activity is inhibited	-0.0305883	-0.00414621	-0.0305006	-0.0149752	0.013819263676675	-0.0336587
R-HSA-5633008	TP53 Regulates Transcription of Cell Death Genes	-0.160787	-0.14437	-0.0758789	-0.150601	-0.160878	-0.156289
R-HSA-5675482	Regulation of necroptotic cell death	-0.170899	-0.179553	-0.0962864	-0.182734	-0.137317	-0.172454
R-HSA-6803211	TP53 Regulates Transcription of Death Receptors and Ligands	-0.233379	-0.194247	-0.0599711	-0.242712	-0.272936	-0.223304
R-HSA-69416	Dimerization of procaspase-8	-0.0305883	-0.00414621	-0.0305006	-0.0149752	0.013819263676675	-0.0336587
R-HSA-75158	TRAIL signaling	-0.207027	-0.159983	0.0589789890033952	-0.293701	-0.208505	-0.263382
R-HSA-1169091	Activation of NF-kappaB in B cells	-0.205874	-0.2165	-0.112572	-0.231776	-0.219517	-0.208867
R-HSA-420499	Class C/3 (Metabotropic glutamate/pheromone receptors)	0.14284944594574	-0.00873582	0.283960064220884	0.117682083175484	0.150003082902665	0.0165542609838646
R-HSA-375276	Peptide ligand-binding receptors	-0.200416	-0.07073	-0.0305893	-0.195438	-0.170911	-0.154539
R-HSA-1236978	Cross-presentation of soluble exogenous antigens (endosomes)	-0.209128	-0.175966	-0.0387168	-0.218705	-0.184243	-0.197621
R-HSA-174084	Autodegradation of Cdh1 by Cdh1:APC/C	-0.209919	-0.219181	-0.086095	-0.232603	-0.201461	-0.201082
R-HSA-174113	SCF-beta-TrCP mediated degradation of Emi1	-0.194433	-0.216975	-0.104435	-0.221308	-0.201385	-0.200858
R-HSA-174154	APC/C:Cdc20 mediated degradation of Securin	-0.219587	-0.229939	-0.0916694	-0.241849	-0.210948	-0.210891
R-HSA-174178	APC/C:Cdh1 mediated degradation of Cdc20 and other APC/C:Cdh1 targeted proteins in late mitosis/early G1	-0.223792	-0.239019	-0.103662	-0.240214	-0.206458	-0.216566
R-HSA-174184	Cdc20:Phospho-APC/C mediated degradation of Cyclin A	-0.227701	-0.227982	-0.108879	-0.244143	-0.218693	-0.220553
R-HSA-176408	Regulation of APC/C activators between G1/S and early anaphase	-0.203404	-0.213699	-0.121731	-0.210573	-0.186894	-0.205468
R-HSA-176409	APC/C:Cdc20 mediated degradation of mitotic proteins	-0.222939	-0.223453	-0.107552	-0.238293	-0.213651	-0.216079
R-HSA-176814	Activation of APC/C and APC/C:Cdc20 mediated degradation of mitotic proteins	-0.218901	-0.218978	-0.114597	-0.229624	-0.203852	-0.208287
R-HSA-179419	APC:Cdc20 mediated degradation of cell cycle proteins prior to satisfation of the cell cycle checkpoint	-0.224044	-0.224574	-0.107004	-0.240189	-0.214877	-0.217051
R-HSA-187577	SCF(Skp2)-mediated degradation of p27/p21	-0.204725	-0.209839	-0.0962708	-0.21593	-0.20019	-0.212229
R-HSA-211733	Regulation of activated PAK-2p34 by proteasome mediated degradation	-0.218794	-0.218758	-0.0653446	-0.2411	-0.224204	-0.20887
R-HSA-349425	Autodegradation of the E3 ubiquitin ligase COP1	-0.219843	-0.220032	-0.101933	-0.245274	-0.237915	-0.207001
R-HSA-350562	Regulation of ornithine decarboxylase (ODC)	-0.212207	-0.21836	-0.0640713	-0.224713	-0.200352	-0.210455
R-HSA-351202	Metabolism of polyamines	-0.215435	-0.213623	-0.0742832	-0.222177	-0.202044	-0.204165
R-HSA-450408	AUF1 (hnRNP D0) binds and destabilizes mRNA	-0.23357	-0.226122	-0.0804018	-0.252969	-0.208457	-0.228241
R-HSA-4608870	Asymmetric localization of PCP proteins	-0.191321	-0.189942	-0.0572759	-0.218527	-0.206318	-0.170011
R-HSA-4641257	Degradation of AXIN	-0.218418	-0.206324	-0.0967829	-0.236316	-0.227508	-0.209416
R-HSA-4641258	Degradation of DVL	-0.230647	-0.216111	-0.059154	-0.259719	-0.238364	-0.211227
R-HSA-5607761	Dectin-1 mediated noncanonical NF-kB signaling	-0.168917	-0.257224	-0.0465173	-0.274769	-0.25653	-0.168224
R-HSA-5610780	Degradation of GLI1 by the proteasome	-0.188316	-0.205506	-0.100137	-0.210799	-0.185368	-0.173337
R-HSA-5610783	Degradation of GLI2 by the proteasome	-0.205086	-0.21805	-0.118558	-0.225241	-0.188081	-0.195018
R-HSA-5610785	GLI3 is processed to GLI3R by the proteasome	-0.201562	-0.214653	-0.115145	-0.221734	-0.184588	-0.191498
R-HSA-5658442	Regulation of RAS by GAPs	-0.272925	-0.222715	-0.0846064	-0.29343	-0.270061	-0.260733
R-HSA-5676590	NIK-->noncanonical NF-kB signaling	-0.154903	-0.24791	-0.0394513	-0.264116	-0.238688	-0.154422
R-HSA-68949	Orc1 removal from chromatin	-0.186664	-0.201999	-0.0888552	-0.197261	-0.18669	-0.199005
R-HSA-69017	CDK-mediated phosphorylation and removal of Cdc6	-0.21396	-0.217025	-0.0977106	-0.228052	-0.20569	-0.206632
R-HSA-69052	Switching of origins to a post-replicative state	-0.181858	-0.208013	-0.0974986	-0.192283	-0.171513	-0.192051
R-HSA-69541	Stabilization of p53	-0.197735	-0.224298	-0.088873	-0.245638	-0.242037	-0.186507
R-HSA-69563	p53-Dependent G1 DNA Damage Response	-0.204748	-0.228046	-0.0909218	-0.246867	-0.245872	-0.192657
R-HSA-69580	p53-Dependent G1/S DNA damage checkpoint	-0.204748	-0.228046	-0.0909218	-0.246867	-0.245872	-0.192657
R-HSA-69601	Ubiquitin-Mediated Degradation of Phosphorylated Cdc25A	-0.20657	-0.21973	-0.105238	-0.231062	-0.209987	-0.207977
R-HSA-69613	p53-Independent G1/S DNA Damage Checkpoint	-0.20657	-0.21973	-0.105238	-0.231062	-0.209987	-0.207977
R-HSA-75815	Ubiquitin-dependent degradation of Cyclin D	-0.235677	-0.233881	-0.106277	-0.256369	-0.231562	-0.228571
R-HSA-8854050	FBXL7 down-regulates AURKA during mitotic entry and in early mitosis	-0.196257	-0.212126	-0.0953259	-0.225783	-0.20907	-0.205834
R-HSA-8939236	RUNX1 regulates transcription of genes involved in differentiation of HSCs	-0.205302	-0.223222	-0.0593744	-0.268531	-0.246423	-0.185474
R-HSA-8941858	Regulation of RUNX3 expression and activity	-0.19619	-0.207743	-0.0600317	-0.270506	-0.260988	-0.186468
R-HSA-9762114	GSK3B and BTRC:CUL1-mediated-degradation of NFE2L2	-0.21157	-0.21616	-0.107701	-0.232925	-0.20914	-0.211011
R-HSA-9766229	Degradation of CDH1	-0.0691351	-0.287164	0.0404124784147011	-0.324982	-0.301336	-0.0665067
R-HSA-9932298	Degradation of CRY and PER proteins	-0.207222	-0.206174	-0.0968512	-0.238253	-0.210342	-0.206792
R-HSA-532668	N-glycan trimming in the ER and Calnexin/Calreticulin cycle	-0.299926	-0.238521	-0.127919	-0.325314	-0.296128	-0.27889
R-HSA-901032	ER Quality Control Compartment (ERQC)	-0.27974	-0.260009	-0.133902	-0.339674	-0.293355	-0.250005
R-HSA-901042	Calnexin/calreticulin cycle	-0.281961	-0.225166	-0.15137	-0.306064	-0.272103	-0.262557
R-HSA-201451	Signaling by BMP	-0.200362	-0.0793264	-0.100245	-0.257519	-0.188258	-0.216743
R-HSA-391160	Signal regulatory protein family interactions	-0.198578	-0.030514	0.00907402515937791	-0.178124	-0.196815	-0.177791
R-HSA-3299685	Detoxification of Reactive Oxygen Species	-0.267524	-0.166428	-0.014308	-0.284254	-0.245888	-0.226218
R-HSA-6803544	Ion influx/efflux at host-pathogen interface	-0.450101	-0.158632	-0.5166	-0.377235	-0.404686	0.0529720159646716
R-HSA-456926	Thrombin signalling through proteinase activated receptors (PARs)	-0.337507	-0.211606	-0.0966558	-0.303112	-0.307668	-0.213579
R-HSA-201722	Formation of the beta-catenin:TCF transactivating complex	-0.249318	-0.244544	-0.111777	-0.303123	-0.277269	-0.221914
R-HSA-2173796	SMAD2/SMAD3:SMAD4 heterotrimer regulates transcription	-0.31045	-0.249027	-0.206196	-0.324537	-0.313094	-0.299693
R-HSA-3899300	SUMOylation of transcription cofactors	-0.127931	-0.205527	-0.0861191	-0.267847	-0.243869	-0.13643
R-HSA-4655427	SUMOylation of DNA methylation proteins	-0.307186	-0.226783	-0.136616	-0.330713	-0.319093	-0.26541
R-HSA-8939243	RUNX1 interacts with co-factors whose precise effect on RUNX1 targets is not known	-0.24956	-0.143677	-0.0821097	-0.281665	-0.263504	-0.239889
R-HSA-8943724	Regulation of PTEN gene transcription	-0.279293	-0.211444	-0.112392	-0.298547	-0.301174	-0.262197
R-HSA-9609523	Insertion of tail-anchored proteins into the endoplasmic reticulum membrane	-0.307209	-0.0842622	-0.0827938	-0.306104	-0.265419	-0.255296
R-HSA-112382	Formation of RNA Pol II elongation complex	-0.28748	-0.227039	-0.170065	-0.287817	-0.265515	-0.271193
R-HSA-113418	Formation of the Early Elongation Complex	-0.370898	-0.332584	-0.196786	-0.392518	-0.373561	-0.374752
R-HSA-674695	RNA Polymerase II Pre-transcription Events	-0.248874	-0.223657	-0.13616	-0.269891	-0.247178	-0.257375
R-HSA-6796648	TP53 Regulates Transcription of DNA Repair Genes	-0.223842	-0.201183	-0.139938	-0.226779	-0.235029	-0.217465
R-HSA-6807505	RNA polymerase II transcribes snRNA genes	-0.260189	-0.267431	-0.178204	-0.289057	-0.28793	-0.29686
R-HSA-72086	mRNA Capping	-0.383716	-0.335475	-0.221151	-0.410946	-0.402119	-0.388072
R-HSA-75955	RNA Polymerase II Transcription Elongation	-0.28748	-0.227039	-0.170065	-0.287817	-0.265515	-0.271193
R-HSA-77075	RNA Pol II CTD phosphorylation and interaction with CE	-0.348219	-0.368227	-0.310182	-0.351881	-0.353142	-0.353456
R-HSA-73776	RNA Polymerase II Promoter Escape	-0.2422	-0.281221	-0.169498	-0.289239	-0.278079	-0.303622
R-HSA-73779	RNA Polymerase II Transcription Pre-Initiation And Promoter Opening	-0.2422	-0.281221	-0.169498	-0.289239	-0.278079	-0.303622
R-HSA-75953	RNA Polymerase II Transcription Initiation	-0.2422	-0.281221	-0.169498	-0.289239	-0.278079	-0.303622
R-HSA-76042	RNA Polymerase II Transcription Initiation And Promoter Clearance	-0.2422	-0.281221	-0.169498	-0.289239	-0.278079	-0.303622
R-HSA-444209	Free fatty acid receptors	-0.265053	-0.173472	-0.0162053	-0.167526	-0.17588	-0.255746
R-HSA-140342	Apoptosis induced DNA fragmentation	-0.256102	-0.319344	-0.0733567	-0.392025	-0.311622	-0.291329
R-HSA-75153	Apoptotic execution phase	-0.172444	-0.140599	-0.0630046	-0.2197	-0.17592	-0.169613
R-HSA-1181150	Signaling by NODAL	-0.19839	-0.0733997	-0.172509	-0.189634	-0.203866	-0.152573
R-HSA-1433617	Regulation of signaling by NODAL	0.048877976545995	0.113503237248146	-0.170382	-0.0265612	-0.0533049	-0.102783
R-HSA-5669034	TNFs bind their physiological receptors	0.0272713435259446	0.0114034588445648	-0.0145294	0.0281513334671646	0.0250820868339898	0.0488012621013863
R-HSA-156827	L13a-mediated translational silencing of Ceruloplasmin expression	-0.0457171	-0.390554	0.108792210662162	-0.477131	-0.41943	-0.0748398
R-HSA-72613	Eukaryotic Translation Initiation	-0.0539447	-0.380428	0.101731613227853	-0.469201	-0.417274	-0.0877698
R-HSA-72649	Translation initiation complex formation	-0.0872162	-0.41209	0.0454397546368072	-0.470335	-0.41247	-0.124821
R-HSA-72662	Activation of the mRNA upon binding of the cap-binding complex and eIFs, and subsequent binding to 43S	-0.0885598	-0.416101	0.0398528111610979	-0.472108	-0.415442	-0.132575
R-HSA-72689	Formation of a pool of free 40S subunits	0.00639822650445016	-0.401946	0.141235689927484	-0.482705	-0.420469	-0.0335058
R-HSA-72695	Formation of the ternary complex, and subsequently, the 43S complex	-0.0509275	-0.421892	0.0747384075113735	-0.477739	-0.418304	-0.0947552
R-HSA-72702	Ribosomal scanning and start codon recognition	-0.0686847	-0.413369	0.0552725199852349	-0.466759	-0.412666	-0.106787
R-HSA-72706	GTP hydrolysis and joining of the 60S ribosomal subunit	-0.0308441	-0.392385	0.115756442667986	-0.474215	-0.420175	-0.0603541
R-HSA-72737	Cap-dependent Translation Initiation	-0.0539447	-0.380428	0.101731613227853	-0.469201	-0.417274	-0.0877698
R-HSA-112308	Presynaptic depolarization and calcium channel opening	0.305521545615048	0.263806034876595	0.355918073094005	0.368039980390806	0.343746424234095	0.297216635902498
R-HSA-9013420	RHOU GTPase cycle	-0.128696	-0.0525764	-0.0326841	-0.140868	-0.143864	-0.0894425
R-HSA-176187	Activation of ATR in response to replication stress	0.0236003765176364	-0.0263964	0.00689632735519624	0.000250037429952138	-0.00690467	-0.0458694
R-HSA-68962	Activation of the pre-replicative complex	-0.0149097	-0.0330345	-0.0118995	-0.00113824	-0.0237524	-0.0269185
R-HSA-8953750	Transcriptional Regulation by E2F6	-0.218169	-0.164853	-0.15266	-0.215296	-0.216412	-0.202378
R-HSA-1368108	BMAL1:CLOCK,NPAS2 activates circadian expression	-0.286933	-0.16786	-0.16761	-0.281312	-0.292348	-0.292254
R-HSA-9931509	Expression of BMAL (ARNTL), CLOCK, and NPAS2	-0.316905	-0.202322	-0.157159	-0.324293	-0.325062	-0.310421
R-HSA-9931510	Phosphorylated BMAL1:CLOCK (ARNTL:CLOCK) activates expression of core clock genes	-0.171262	-0.166391	-0.0515522	-0.244073	-0.253849	-0.169996
R-HSA-9931512	Phosphorylation of CLOCK, acetylation of BMAL1 (ARNTL) at target gene promoters	-0.0788274	-0.0482212	-0.112679	-0.155885	-0.130503	-0.122031
R-HSA-9931521	The CRY:PER:kinase complex represses transactivation by the BMAL:CLOCK (ARNTL:CLOCK) complex	-0.0920923	-0.0133604	0.0339718309945163	-0.179012	-0.185319	-0.122975
R-HSA-9931529	Phosphorylation and nuclear translocation of BMAL1 (ARNTL) and CLOCK	-0.139032	-0.183736	-0.0559856	-0.270273	-0.274919	-0.160929
R-HSA-1483255	PI Metabolism	-0.172756	-0.103518	-0.0964023	-0.148497	-0.180804	-0.199203
R-HSA-1660499	Synthesis of PIPs at the plasma membrane	-0.159813	-0.0751069	-0.0796227	-0.129162	-0.162828	-0.188438
R-HSA-389356	Co-stimulation by CD28	-0.135305	-0.215724	-0.0242345	-0.28346	-0.275159	-0.106243
R-HSA-389357	CD28 dependent PI3K/Akt signaling	-0.145656	-0.263442	-0.00392385	-0.356942	-0.341799	-0.107935
R-HSA-512988	Interleukin-3, Interleukin-5 and GM-CSF signaling	-0.217651	-0.128784	-0.122604	-0.228959	-0.213732	-0.187916
R-HSA-8853659	RET signaling	-0.16702	-0.0855717	-0.0416026	-0.224971	-0.212	-0.112246
R-HSA-9006335	Signaling by Erythropoietin	-0.206324	-0.115053	-0.114338	-0.197296	-0.21091	-0.225123
R-HSA-9027276	Erythropoietin activates Phosphoinositide-3-kinase (PI3K)	-0.214941	-0.111933	0.0687801887489577	-0.265333	-0.257795	-0.247134
R-HSA-912526	Interleukin receptor SHC signaling	-0.216771	-0.112458	-0.0917002	-0.220064	-0.262025	-0.159959
R-HSA-912631	Regulation of signaling by CBL	-0.261174	-0.169579	-0.107689	-0.276542	-0.254236	-0.230693
R-HSA-9680350	Signaling by CSF1 (M-CSF) in myeloid cells	-0.222341	-0.180267	-0.131686	-0.262915	-0.237414	-0.199236
R-HSA-9856530	High laminar flow shear stress activates signaling by PIEZO1 and PECAM1:CDH5:KDR in endothelial cells	-0.239089	-0.133542	-0.0412967	-0.259736	-0.227953	-0.195798
R-HSA-9927354	Co-stimulation by ICOS	-0.120978	0.0831865405069031	-0.0550138	-0.0661095	-0.14515	-0.124203
R-HSA-204174	Regulation of pyruvate dehydrogenase (PDH) complex	-0.210834	-0.179791	-0.114101	-0.144482	-0.100493	-0.221476
R-HSA-5362517	Signaling by Retinoic Acid	-0.241567	-0.10381	-0.12342	-0.124836	-0.140776	-0.248586
R-HSA-70268	Pyruvate metabolism	-0.327297	-0.272256	-0.108091	-0.363762	-0.283535	-0.291076
R-HSA-9861559	PDH complex synthesizes acetyl-CoA from PYR	-0.132488	-0.157967	0.118373872645136	-0.0800058	-0.0989478	-0.139226
R-HSA-9861718	Regulation of pyruvate metabolism	-0.286501	-0.260913	-0.106193	-0.325119	-0.274598	-0.229772
R-HSA-425397	Transport of vitamins, nucleosides, and related molecules	-0.0394246	-0.00121388	0.100854837986568	-0.0532093	0.00741129329864298	-0.112887
R-HSA-83936	Transport of nucleosides and free purine and pyrimidine bases across the plasma membrane	-0.110741	0.126871663991101	0.0175168457110049	-0.122806	0.00879258849420611	-0.184564
R-HSA-112310	Neurotransmitter release cycle	-0.155334	-0.0752593	-0.118037	-0.124803	-0.0774384	-0.129793
R-HSA-210500	Glutamate Neurotransmitter Release Cycle	-0.1682	-0.10578	-0.182578	-0.135821	-0.0967534	-0.113659
R-HSA-425393	Transport of inorganic cations/anions and amino acids/oligopeptides	-0.12466	0.0195269003579735	-0.0356507	-0.0839292	-0.0360897	-0.117642
R-HSA-417957	P2Y receptors	-0.130347	-0.147876	-0.155733	-0.110911	-0.0811742	-0.0734138
R-HSA-418038	Nucleotide-like (purinergic) receptors	-0.121162	-0.138327	-0.150874	-0.0931823	-0.0700249	-0.0681334
R-HSA-202131	Metabolism of nitric oxide: NOS3 activation and regulation	-0.146469	-0.130494	-0.0576343	-0.205604	-0.121328	-0.119893
R-HSA-203641	NOSTRIN mediated eNOS trafficking	-0.0687666	-0.0257521	0.0990101782714254	-0.0713317	-0.071042	-0.0730332
R-HSA-373752	Netrin-1 signaling	-0.108442	-0.0934669	-0.0157093	-0.14635	-0.134248	-0.0674164
R-HSA-373753	Nephrin family interactions	-0.110928	-0.0493665	0.0522431311034442	-0.120429	-0.134921	-0.0581669
R-HSA-3928662	EPHB-mediated forward signaling	-0.238449	-0.206063	-0.0374403	-0.267906	-0.256413	-0.202303
R-HSA-418885	DCC mediated attractive signaling	-0.193023	-0.185044	0.00718770088454668	-0.265322	-0.243082	-0.137126
R-HSA-392154	Nitric oxide stimulates guanylate cyclase	-0.00423701	0.116388337825834	0.205952468859871	0.127881984324757	0.078059791330765	0.0701727490163898
R-HSA-418346	Platelet homeostasis	-0.167804	-0.0897376	-0.0213617	-0.15231	-0.118457	-0.156827
R-HSA-418457	cGMP effects	0.46449761069439	0.419669102339413	0.337225571077168	0.497912523922584	0.478598314584504	0.458144335554397
R-HSA-1592230	Mitochondrial biogenesis	-0.236245	-0.183664	-0.071133	-0.25214	-0.231699	-0.249087
R-HSA-163282	Mitochondrial transcription initiation	-0.390097	-0.131866	-0.0781446	-0.336117	-0.192682	-0.3983
R-HSA-2151201	Transcriptional activation of mitochondrial biogenesis	-0.284053	-0.18898	-0.0931126	-0.285174	-0.276606	-0.275688
R-HSA-75944	Transcription from mitochondrial promoters	-0.356575	-0.119617	-0.072233	-0.299586	-0.168231	-0.365536
R-HSA-9913635	Strand-asynchronous mitochondrial DNA replication	-0.0193327	0.10592062255756	0.062645247084878	0.0448418986307099	0.0148199097297688	-0.0295873
R-HSA-165159	MTOR signalling	-0.105995	-0.182207	-0.0973629	-0.24752	-0.225941	-0.130826
R-HSA-166208	mTORC1-mediated signalling	-0.063746	-0.201397	-0.0768289	-0.261962	-0.227205	-0.102873
R-HSA-380108	Chemokine receptors bind chemokines	-0.140321	-0.0888798	-0.0569255	-0.208327	-0.169008	-0.0977711
R-HSA-3214815	HDACs deacetylate histones	-0.273425	-0.213472	-0.141707	-0.291287	-0.267957	-0.267358
R-HSA-427413	NoRC negatively regulates rRNA expression	-0.18959	-0.237965	-0.0792409	-0.298308	-0.273917	-0.196147
R-HSA-5250941	Negative epigenetic regulation of rRNA expression	-0.146582	-0.226637	-0.0733573	-0.278125	-0.244323	-0.157563
R-HSA-428359	Insulin-like Growth Factor-2 mRNA Binding Proteins (IGF2BPs/IMPs/VICKZs) bind RNA	-0.483794	-0.422873	0.103987253502417	-0.484066	-0.433607	-0.364792
R-HSA-1660514	Synthesis of PIPs at the Golgi membrane	-0.225506	-0.131848	-0.0588048	-0.209556	-0.242027	-0.266104
R-HSA-1660516	Synthesis of PIPs at the early endosome membrane	-0.183831	-0.183917	-0.173721	-0.14635	-0.179508	-0.172587
R-HSA-1660517	Synthesis of PIPs at the late endosome membrane	-0.181567	-0.1503	-0.164365	-0.10535	-0.154928	-0.157169
R-HSA-163685	Integration of energy metabolism	-0.212019	-0.113611	-0.112745	-0.204663	-0.168065	-0.161585
R-HSA-422356	Regulation of insulin secretion	-0.200139	-0.068819	-0.0549298	-0.215196	-0.181326	-0.114899
R-HSA-109704	PI3K Cascade	-0.088714	0.0777239643403637	-0.029763	-0.0856598	-0.125788	-0.0516317
R-HSA-112399	IRS-mediated signalling	-0.109545	0.028845400726794	-0.0836427	-0.0997401	-0.138743	-0.0786062
R-HSA-114604	GPVI-mediated activation cascade	-0.270905	-0.143234	-0.0531693	-0.293835	-0.280471	-0.221251
R-HSA-1266695	Interleukin-7 signaling	-0.307563	-0.219441	-0.181294	-0.324233	-0.286482	-0.239574
R-HSA-1433557	Signaling by SCF-KIT	-0.212117	-0.144639	-0.0965204	-0.233658	-0.22046	-0.160046
R-HSA-186763	Downstream signal transduction	-0.119225	-0.0542959	-0.103816	-0.128616	-0.123534	-0.111685
R-HSA-198203	PI3K/AKT activation	-0.168846	-0.0757695	0.00747075262888738	-0.244367	-0.265939	-0.286483
R-HSA-201556	Signaling by ALK	-0.288776	-0.236746	-0.146647	-0.318396	-0.314599	-0.287037
R-HSA-210993	Tie2 Signaling	-0.142584	-0.00342543	-0.105757	-0.108097	-0.139187	-0.136983
R-HSA-2404192	Signaling by Type 1 Insulin-like Growth Factor 1 Receptor (IGF1R)	-0.151759	0.0355535435370938	-0.100368	-0.137192	-0.164433	-0.110884
R-HSA-2424491	DAP12 signaling	-0.218276	-0.149243	-0.0696331	-0.207428	-0.20043	-0.124138
R-HSA-2428924	IGF1R signaling cascade	-0.151759	0.0355535435370938	-0.100368	-0.137192	-0.164433	-0.110884
R-HSA-2428928	IRS-related events triggered by IGF1R	-0.147502	0.0408751599331768	-0.0961814	-0.133268	-0.160503	-0.106376
R-HSA-74751	Insulin receptor signalling cascade	-0.143842	-0.0341804	-0.138417	-0.116505	-0.158222	-0.0933534
R-HSA-74752	Signaling by Insulin receptor	-0.149398	-0.0762803	-0.115523	-0.139581	-0.147829	-0.10336
R-HSA-9696264	RND3 GTPase cycle	-0.170098	-0.0343628	0.0172812932532473	-0.175506	-0.195923	-0.160347
R-HSA-9696273	RND1 GTPase cycle	-0.0967071	0.0266131362997419	0.0271222588617228	-0.100633	-0.094201	-0.087424
R-HSA-9842663	Signaling by LTK	-0.11688	-0.052403	-0.00873383	-0.149207	-0.187319	-0.12042
R-HSA-6811438	Intra-Golgi traffic	-0.221193	-0.130761	-0.169269	-0.17288	-0.094439	-0.195525
R-HSA-8853383	Lysosomal oligosaccharide catabolism	0.633915922542195	0.574140242255219	0.449740869147876	0.67185151976515	0.650931333837909	0.625798881421161
R-HSA-1638091	Heparan sulfate/heparin (HS-GAG) metabolism	-0.0112377	0.113594504240805	-0.0969882	0.0617499717449764	0.0280737017446058	0.0600491368843469
R-HSA-196854	Metabolism of vitamins and cofactors	-0.137598	-0.0697526	-0.102504	-0.132195	-0.113446	-0.13494
R-HSA-1971475	Glycosaminoglycan-protein linkage region biosynthesis	-0.0506411	0.180973352084337	-0.0725908	0.0491216691045744	0.0472508509971146	-0.00477558
R-HSA-2022928	HS-GAG biosynthesis	0.0228215155345474	0.141924476712415	-0.0436973	0.101656207965218	0.0643850164502562	0.0761818943800242
R-HSA-2024096	HS-GAG degradation	-0.076943	0.101206251161108	-0.165933	-0.00580013	-0.0386946	0.0200304222147702
R-HSA-2187338	Visual phototransduction	-0.109044	0.0156406423681688	-0.0601129	-0.138554	-0.110797	-0.0923538
R-HSA-3000171	Non-integrin membrane-ECM interactions	-0.144646	0.144482271990349	-0.0425165	-0.130276	-0.15468	-0.0870428
R-HSA-6806667	Metabolism of fat-soluble vitamins	-0.12226	0.0233269519337173	-0.0882431	-0.124271	-0.080151	-0.131448
R-HSA-975634	Retinoid metabolism and transport	-0.159887	0.0397034932173082	-0.106481	-0.137803	-0.106066	-0.146076
R-HSA-9913351	Formation of the dystrophin-glycoprotein complex (DGC)	-0.0590377	0.0918154484696935	0.0421162328983243	-0.0293156	-0.0549936	0.0243990507326249
R-HSA-264876	Insulin processing	-0.166374	-0.118327	-0.171424	-0.109124	-0.0860191	-0.132645
R-HSA-5620916	VxPx cargo-targeting to cilium	-0.159997	-0.139085	-0.19007	-0.147723	-0.130274	-0.162451
R-HSA-8851680	Butyrophilin (BTN) family interactions	0.20690790362246	0.0927022761527699	0.161393849045792	0.0736597688983062	0.153229359691141	0.16764109855449
R-HSA-186712	Regulation of beta-cell development	-0.224123	-0.179926	-0.107931	-0.290353	-0.285839	-0.225123
R-HSA-210747	Regulation of gene expression in early pancreatic precursor cells	0.160269973253518	0.306290950917492	-0.0192552	0.225494667919817	0.199727139575647	0.151095494588758
R-HSA-383280	Nuclear Receptor transcription pathway	-0.172229	-0.276031	0.0404933229555219	-0.436499	-0.42021	-0.180502
R-HSA-4090294	SUMOylation of intracellular receptors	-0.177585	-0.269571	0.0186777793220113	-0.388133	-0.36595	-0.152659
R-HSA-5689901	Metalloprotease DUBs	-0.260069	-0.230931	-0.119024	-0.309844	-0.294589	-0.259633
R-HSA-420029	Tight junction interactions	-0.124833	-0.0149415	0.00110872725183581	-0.107565	-0.120367	-0.134105
R-HSA-8935964	RUNX1 regulates expression of components of tight junctions	-0.0614646	0.0405357150310088	0.0838395927112105	-0.0581681	-0.0370765	-0.0704081
R-HSA-2142753	Arachidonate metabolism	-0.00148712	0.102879113359837	0.0619754934069665	0.0225483403280796	0.0405973166754859	-0.00368643
R-HSA-447041	CHL1 interactions	-0.253437	0.0802398150526515	-0.0613054	-0.198367	-0.0997629	-0.214955
R-HSA-6791226	Major pathway of rRNA processing in the nucleolus and cytosol	-0.0475296	-0.280216	0.0407671729146701	-0.338527	-0.288577	-0.0759971
R-HSA-8868773	rRNA processing in the nucleus and cytosol	-0.0543309	-0.275122	0.0357675662896744	-0.337777	-0.289054	-0.0823332
R-HSA-9022702	MECP2 regulates transcription of neuronal ligands	-0.286453	-0.254677	-0.2022	-0.303519	-0.324734	-0.322589
R-HSA-9725554	Differentiation of Keratinocytes in Interfollicular Epidermis in Mammalian Skin	-0.22003	0.0658929664806368	0.100686223719876	-0.197526	-0.158975	-0.174732
R-HSA-9734779	Developmental Cell Lineages of the Integumentary System	-0.23861	-0.0359705	-0.00736021	-0.235047	-0.210483	-0.204137
R-HSA-9830369	Kidney development	-0.204144	0.0487234366987608	-0.087845	-0.194066	-0.180659	-0.156345
R-HSA-9831926	Nephron development	-0.0524676	0.028916514949548	-0.0463942	-0.144056	-0.177088	-0.00305475
R-HSA-3928664	Ephrin signaling	-0.130717	-0.134088	-0.00298143	-0.173665	-0.148665	-0.118589
R-HSA-447043	Neurofascin interactions	-0.107934	-0.214972	0.0123750266602389	-0.181679	-0.138213	-0.138571
R-HSA-1483226	Synthesis of PI	0.175193518566276	0.0263052288870465	0.273018284176926	0.128089079928222	0.102685856074046	0.16740108203187
R-HSA-6790901	rRNA modification in the nucleus and cytosol	0.05089674863003	-0.288753	0.0651978268517726	-0.372419	-0.346012	-0.0143144
R-HSA-390471	Association of TriC/CCT with target proteins during biosynthesis	-0.239853	-0.229036	-0.138582	-0.264309	-0.276256	-0.246413
R-HSA-9823739	Formation of the anterior neural plate	-0.296512	-0.207959	-0.172306	-0.286611	-0.294905	-0.321335
R-HSA-9832991	Formation of the posterior neural plate	-0.338025	-0.167857	-0.207675	-0.29304	-0.319927	-0.324909
R-HSA-1912420	Pre-NOTCH Processing in Golgi	-0.349418	-0.200778	-0.176752	-0.351457	-0.37511	-0.306055
R-HSA-9603798	Class I peroxisomal membrane protein import	0.100891060832266	0.0521849665034135	0.154848716119952	0.123510505562622	0.173897259532698	0.0919738524067975
R-HSA-8935690	Digestion	0.105925332119363	0.0240109160747572	-0.117694	0.181324577182981	0.14279968093749	0.0917270609435963
R-HSA-8963743	Digestion and absorption	0.093528109214724	0.0373590779876847	0.173129296593853	0.0764843067903818	0.134041408203851	-0.00491562
R-HSA-6783783	Interleukin-10 signaling	-0.16807	-0.0708242	-0.124655	-0.154654	-0.135965	-0.138843
R-HSA-525793	Myogenesis	-0.244443	-0.221415	-0.0750751	-0.274734	-0.242956	-0.222752
R-HSA-877300	Interferon gamma signaling	-0.282151	-0.261255	-0.0881306	-0.382628	-0.343643	-0.26102
R-HSA-73980	RNA Polymerase III Transcription Termination	-0.145174	-0.164285	-0.0677084	-0.174051	-0.14473	-0.14426
R-HSA-2559585	Oncogene Induced Senescence	-0.249123	-0.273487	-0.155663	-0.33317	-0.312118	-0.232177
R-HSA-68911	G2 Phase	-0.197693	-0.148806	-0.166075	-0.109593	-0.185301	-0.206887
R-HSA-69231	Cyclin D associated events in G1	-0.171955	-0.207427	-0.10755	-0.211631	-0.172145	-0.186789
R-HSA-69236	G1 Phase	-0.171955	-0.207427	-0.10755	-0.211631	-0.172145	-0.186789
R-HSA-157579	Telomere Maintenance	-0.209188	-0.241677	-0.0315989	-0.292561	-0.274509	-0.189518
R-HSA-171319	Telomere Extension By Telomerase	-0.244023	-0.296876	0.0116211330702059	-0.306102	-0.306238	-0.231163
R-HSA-180786	Extension of Telomeres	-0.23356	-0.279651	0.0100944970365217	-0.277938	-0.276038	-0.208144
R-HSA-204005	COPII-mediated vesicle transport	-0.0953612	-0.072099	-0.0822235	-0.0697448	-0.0543326	-0.105903
R-HSA-3238698	WNT ligand biogenesis and trafficking	-0.191595	0.139466714963379	0.0884086259859544	-0.170826	-0.128753	-0.241307
R-HSA-499943	Interconversion of nucleotide di- and triphosphates	-0.354572	-0.108574	-0.0529306	-0.338805	-0.208861	-0.260964
R-HSA-9749641	Aspirin ADME	-0.14075	-0.10596	0.069681172477058	-0.111074	0.0572003499995595	-0.102551
R-HSA-141405	Inhibition of the proteolytic activity of APC/C required for the onset of anaphase by mitotic spindle checkpoint components	-0.228684	-0.269226	-0.159056	-0.230135	-0.151774	-0.236604
R-HSA-141430	Inactivation of APC/C via direct inhibition of the APC/C complex	-0.228684	-0.269226	-0.159056	-0.230135	-0.151774	-0.236604
R-HSA-174048	APC/C:Cdc20 mediated degradation of Cyclin B	-0.236548	-0.240198	-0.168514	-0.274799	-0.202502	-0.221409
R-HSA-176407	Conversion from APC/C:Cdc20 to APC/C:Cdh1 in late anaphase	-0.166693	-0.265615	-0.16189	-0.183805	-0.0711796	-0.175467
R-HSA-176412	Phosphorylation of the APC/C	-0.202393	-0.19495	-0.218671	-0.188195	-0.123446	-0.190808
R-HSA-179409	APC-Cdc20 mediated degradation of Nek2A	-0.241281	-0.244981	-0.156751	-0.272741	-0.205353	-0.228905
R-HSA-2559582	Senescence-Associated Secretory Phenotype (SASP)	-0.231974	-0.233707	-0.125791	-0.287431	-0.256054	-0.209958
R-HSA-8853884	Transcriptional Regulation by VENTX	-0.237813	-0.246798	-0.124809	-0.27246	-0.255617	-0.234577
R-HSA-163765	ChREBP activates metabolic gene expression	-0.0231805	-0.0391075	0.00327068323558505	-0.0280268	0.0550623854175347	0.0259368578038076
R-HSA-1655829	Regulation of cholesterol biosynthesis by SREBP (SREBF)	-0.23548	-0.143154	-0.15913	-0.251277	-0.210329	-0.26996
R-HSA-196780	Biotin transport and metabolism	-0.104507	-0.16568	-0.327583	-0.0307068	-0.0624777	-0.117022
R-HSA-196849	Metabolism of water-soluble vitamins and cofactors	-0.0594349	0.000903692461870942	-0.0247896	0.000467874565792115	-0.0305028	-0.0857155
R-HSA-200425	Carnitine shuttle	-0.191575	-0.083077	-0.0938021	-0.184045	-0.258963	-0.222849
R-HSA-2426168	Activation of gene expression by SREBF (SREBP)	-0.19845	-0.125523	-0.14746	-0.225368	-0.185209	-0.25659
R-HSA-964975	Vitamin B6 activation to pyridoxal phosphate	-0.0643	-0.139729	-0.277784	-0.00406574	-0.0360906	-0.0784966
R-HSA-9024446	NR1H2 and NR1H3-mediated signaling	-0.19043	-0.15383	-0.117906	-0.240743	-0.181685	-0.218873
R-HSA-9029558	NR1H2 & NR1H3 regulate gene expression linked to lipogenesis	-0.133759	-0.0996476	-0.173361	-0.159595	-0.100406	-0.203371
R-HSA-9818564	Epigenetic regulation of gene expression by MLL3 and MLL4 complexes	-0.206837	-0.190218	-0.101538	-0.24174	-0.195386	-0.18842
R-HSA-9841922	MLL4 and MLL3 complexes regulate expression of PPARG target genes in adipogenesis and hepatic steatosis	-0.206837	-0.190218	-0.101538	-0.24174	-0.195386	-0.18842
R-HSA-9851695	Epigenetic regulation of adipogenesis genes by MLL3 and MLL4 complexes	-0.206837	-0.190218	-0.101538	-0.24174	-0.195386	-0.18842
R-HSA-6794361	Neurexins and neuroligins	-0.0538434	-0.0315385	0.00540276576779475	-0.0577434	-0.0520776	-0.0261824
R-HSA-6794362	Protein-protein interactions at synapses	-0.0588735	0.00198855574669707	-0.0122093	-0.0528651	-0.0539443	-0.031615
R-HSA-1433559	Regulation of KIT signaling	-0.257669	-0.203817	-0.0782789	-0.322685	-0.281702	-0.206655
R-HSA-9845614	Sphingolipid catabolism	-0.203376	0.0985682682243507	-0.160965	-0.151705	-0.115351	-0.154476
R-HSA-3214858	RMTs methylate histone arginines	-0.175871	-0.186126	-0.0737779	-0.264838	-0.240575	-0.170062
R-HSA-9764790	Positive Regulation of CDH1 Gene Transcription	-0.29811	-0.264414	-0.131159	-0.275927	-0.255353	-0.307597
R-HSA-9824585	Regulation of MITF-M-dependent genes involved in pigmentation	-0.225669	-0.135167	-0.0521007	-0.219635	-0.203395	-0.188109
R-HSA-9932444	ATP-dependent chromatin remodelers	-0.197791	-0.0819645	-0.0499384	-0.164538	-0.160047	-0.13406
R-HSA-9932451	SWI/SNF chromatin remodelers	-0.197791	-0.0819645	-0.0499384	-0.164538	-0.160047	-0.13406
R-HSA-9933937	Formation of the canonical BAF (cBAF) complex	-0.20541	-0.0582611	-0.0510962	-0.148442	-0.153641	-0.116795
R-HSA-9933946	Formation of the embryonic stem cell BAF (esBAF) complex	-0.180193	-0.0504069	-0.0508567	-0.137952	-0.142835	-0.104264
R-HSA-9934037	Formation of neuronal progenitor and neuronal BAF (npBAF and nBAF)	-0.203461	-0.0726982	-0.0484366	-0.159503	-0.154153	-0.131395
R-HSA-9607240	FLT3 Signaling	-0.215609	-0.173424	-0.0880735	-0.253851	-0.229754	-0.176616
R-HSA-9706369	Negative regulation of FLT3	-0.292732	-0.180284	-0.12384	-0.333693	-0.29199	-0.244242
R-HSA-982772	Growth hormone receptor signaling	-0.269968	-0.171145	-0.169584	-0.29077	-0.265295	-0.242696
R-HSA-1250196	SHC1 events in ERBB2 signaling	-0.309786	-0.127975	-0.0654569	-0.349456	-0.322377	-0.256019
R-HSA-1250342	PI3K events in ERBB4 signaling	-0.0151351	0.110725994449495	0.101732999627603	0.0143071739720329	-0.0626555	-0.0223308
R-HSA-1250347	SHC1 events in ERBB4 signaling	-0.151104	-0.0350763	-0.155611	-0.10462	-0.135137	-0.161816
R-HSA-1251985	Nuclear signaling by ERBB4	-0.137248	-0.154182	0.0408177206636748	-0.28775	-0.280016	-0.107782
R-HSA-1306955	GRB7 events in ERBB2 signaling	-0.444906	-0.177007	-0.0201206	-0.480277	-0.376522	-0.404174
R-HSA-1358803	Downregulation of ERBB2:ERBB3 signaling	-0.287816	-0.23813	-0.104844	-0.353102	-0.300333	-0.258363
R-HSA-1963640	GRB2 events in ERBB2 signaling	-0.362188	-0.127327	-0.0732747	-0.373519	-0.336897	-0.322703
R-HSA-1963642	PI3K events in ERBB2 signaling	-0.348492	-0.0907881	-0.0347416	-0.351131	-0.32213	-0.298286
R-HSA-6785631	ERBB2 Regulates Cell Motility	-0.3486	-0.150578	-0.0614884	-0.394502	-0.349594	-0.348846
R-HSA-8847993	ERBB2 Activates PTK6 Signaling	-0.373775	-0.124112	-0.0584072	-0.387371	-0.347884	-0.333925
R-HSA-8863795	Downregulation of ERBB2 signaling	-0.302955	-0.188134	-0.119395	-0.338235	-0.289714	-0.26512
R-HSA-432030	Transport of glycerol from adipocytes to the liver by Aquaporins	-0.272056	0.570375673325984	-0.487891	-0.183222	-0.21922	-0.285623
R-HSA-432047	Passive transport by Aquaporins	-0.0766945	0.0538270608449684	0.0357772982303073	-0.0416104	-0.0756921	-0.04092
R-HSA-445717	Aquaporin-mediated transport	-0.207284	-0.0340209	0.0251683297307644	-0.215699	-0.163568	-0.127401
R-HSA-373755	Semaphorin interactions	-0.24248	-0.137418	-0.0746577	-0.232296	-0.212005	-0.195288
R-HSA-399956	CRMPs in Sema3A signaling	-0.256915	-0.144938	-0.109104	-0.265233	-0.219087	-0.176274
R-HSA-1059683	Interleukin-6 signaling	-0.226369	-0.0740654	-0.117598	-0.240514	-0.225894	-0.205299
R-HSA-2586552	Signaling by Leptin	-0.204274	-0.131062	-0.097707	-0.228261	-0.181432	-0.190102
R-HSA-6783589	Interleukin-6 family signaling	-0.231635	-0.0661319	-0.108125	-0.222703	-0.219239	-0.209641
R-HSA-877312	Regulation of IFNG signaling	-0.234471	-0.0866636	-0.196335	-0.262487	-0.234666	-0.206292
R-HSA-8849474	PTK6 Activates STAT3	-0.252934	-0.215979	-0.121259	-0.293414	-0.255096	-0.260925
R-HSA-8939242	RUNX1 regulates transcription of genes involved in differentiation of keratinocytes	-0.167813	-0.0128828	-0.158023	-0.102182	-0.132106	-0.105946
R-HSA-909733	Interferon alpha/beta signaling	-0.211776	-0.266935	-0.0750976	-0.357288	-0.316825	-0.214529
R-HSA-912694	Regulation of IFNA/IFNB signaling	-0.0813943	0.0174127749905075	-0.156654	-0.147629	-0.100532	-0.0890706
R-HSA-9674555	Signaling by CSF3 (G-CSF)	-0.229475	-0.190749	-0.119751	-0.275936	-0.244876	-0.226209
R-HSA-9705462	Inactivation of CSF3 (G-CSF) signaling	-0.264712	-0.235527	-0.15446	-0.292306	-0.243404	-0.255922
R-HSA-5368287	Mitochondrial translation	-0.216069	-0.249872	-0.0579729	-0.29748	-0.281514	-0.233339
R-HSA-9937383	Mitochondrial ribosome-associated quality control	-0.229327	-0.229416	-0.105265	-0.318003	-0.313027	-0.236533
R-HSA-5625900	RHO GTPases activate CIT	-0.280858	-0.204807	-0.00133988	-0.27685	-0.31063	-0.285445
R-HSA-1793185	Chondroitin sulfate/dermatan sulfate metabolism	-0.262766	0.119667620460387	-0.0503813	-0.191004	-0.203826	-0.239407
R-HSA-2022870	CS-GAG biosynthesis	-0.176745	0.237201331893149	-0.00613453	-0.0389221	-0.0670318	-0.187009
R-HSA-2022923	DS-GAG biosynthesis	-0.366577	0.303455779049897	0.0798301875971682	-0.267692	-0.286779	-0.352637
R-HSA-2024101	CS/DS degradation	-0.39143	0.249913184747557	0.018100801986678	-0.277102	-0.276133	-0.370219
R-HSA-381038	XBP1(S) activates chaperone genes	-0.141111	-0.154405	-0.0911373	-0.164933	-0.155621	-0.160557
R-HSA-381070	IRE1alpha activates chaperones	-0.136524	-0.13868	-0.084592	-0.152407	-0.148977	-0.150209
R-HSA-3214842	HDMs demethylate histones	-0.270094	-0.29169	-0.257126	-0.300188	-0.271967	-0.271321
R-HSA-1296041	Activation of G protein gated Potassium channels	-0.231805	-0.0759701	0.139661572249056	-0.176985	-0.0953429	-0.155756
R-HSA-1296059	G protein gated Potassium channels	-0.231805	-0.0759701	0.139661572249056	-0.176985	-0.0953429	-0.155756
R-HSA-1296065	Inwardly rectifying K+ channels	-0.183285	-0.0363836	0.165083151990936	-0.12073	-0.0474117	-0.11173
R-HSA-202040	G-protein activation	-0.215201	-0.0697625	0.0314446835556034	-0.157002	-0.105638	-0.0972799
R-HSA-381676	Glucagon-like Peptide-1 (GLP1) regulates insulin secretion	-0.2956	-0.118214	-0.0258142	-0.301523	-0.261487	-0.181843
R-HSA-392451	G beta:gamma signalling through PI3Kgamma	-0.224382	-0.187174	-0.055788	-0.331388	-0.275583	-0.221945
R-HSA-392851	Prostacyclin signalling through prostacyclin receptor	-0.247785	-0.035378	0.176165962198466	-0.203443	-0.121132	-0.12425
R-HSA-397795	G-protein beta:gamma signalling	-0.206281	-0.169269	-0.0114802	-0.276819	-0.25093	-0.198604
R-HSA-400042	Adrenaline,noradrenaline inhibits insulin secretion	-0.148752	0.175778648040436	0.261915389691328	-0.173983	-0.104261	-0.129488
R-HSA-4086398	Ca2+ pathway	-0.242335	-0.171991	-0.0555578	-0.314372	-0.26576	-0.189648
R-HSA-418217	G beta:gamma signalling through PLC beta	-0.286731	-0.0486822	0.153144564622647	-0.23694	-0.115911	-0.182088
R-HSA-418592	ADP signalling through P2Y purinoceptor 1	-0.243843	-0.213294	0.121057447588094	-0.273489	-0.20457	-0.19387
R-HSA-420092	Glucagon-type ligand receptors	-0.238271	-0.00128969	0.0483163208192794	-0.206012	-0.160903	-0.0777127
R-HSA-428930	Thromboxane signalling through TP receptor	-0.226605	-0.144686	0.0506151294687253	-0.232673	-0.104634	-0.161578
R-HSA-432040	Vasopressin regulates renal water homeostasis via Aquaporins	-0.211266	-0.0284642	0.0255607593796035	-0.228386	-0.153102	-0.125992
R-HSA-451326	Activation of kainate receptors upon glutamate binding	-0.17346	-0.0363962	0.120338895095452	-0.168604	-0.121116	-0.113665
R-HSA-500657	Presynaptic function of Kainate receptors	-0.286731	-0.0486822	0.153144564622647	-0.23694	-0.115911	-0.182088
R-HSA-6814122	Cooperation of PDCL (PhLP1) and TRiC/CCT in G-protein beta folding	-0.19768	-0.173902	-0.070575	-0.271919	-0.228706	-0.196633
R-HSA-8964315	G beta:gamma signalling through BTK	-0.27874	-0.0766807	0.13314653399857	-0.284314	-0.212329	-0.27214
R-HSA-8964616	G beta:gamma signalling through CDC42	-0.20458	-0.126351	0.07808835691484	-0.167996	-0.167008	-0.124725
R-HSA-997272	Inhibition of voltage gated Ca2+ channels via Gbeta/gamma subunits	-0.231805	-0.0759701	0.139661572249056	-0.176985	-0.0953429	-0.155756
R-HSA-199220	Vitamin B5 (pantothenate) metabolism	0.0185371511296391	-0.0402529	0.0158278917235976	-0.0150015	-0.0339822	-0.0499046
R-HSA-201688	WNT mediated activation of DVL	-0.14498	-0.177044	-0.0692808	-0.236567	-0.248835	-0.148541
R-HSA-4641262	Disassembly of the destruction complex and recruitment of AXIN to the membrane	-0.186894	-0.13752	-0.124669	-0.18871	-0.156618	-0.17856
R-HSA-5368598	Negative regulation of TCF-dependent signaling by DVL-interacting proteins	-0.1182	-0.121876	-0.00457245	-0.122463	-0.157027	-0.0754109
R-HSA-2028269	Signaling by Hippo	-0.0786983	-0.0173345	-0.0861927	-0.0610528	-0.0437375	-0.0720116
R-HSA-5099900	WNT5A-dependent internalization of FZD4	-0.187275	-0.218435	-0.0113272	-0.277194	-0.2733	-0.143455
R-HSA-1299316	TWIK-releated acid-sensitive K+ channel (TASK)	-0.868329	-0.867451	0.961551966292135	-0.979635	-0.996138	-0.871138
R-HSA-5694530	Cargo concentration in the ER	-0.123443	-0.0753687	-0.0966114	-0.106527	-0.0859798	-0.140044
R-HSA-6811440	Retrograde transport at the Trans-Golgi-Network	-0.213039	-0.162978	-0.156955	-0.205924	-0.179498	-0.234468
R-HSA-177929	Signaling by EGFR	-0.225144	-0.107746	-0.0745019	-0.232774	-0.220839	-0.190991
R-HSA-3928665	EPH-ephrin mediated repulsion of cells	-0.245182	-0.131413	-0.0542501	-0.244686	-0.223125	-0.178987
R-HSA-9013700	NOTCH4 Activation and Transmission of Signal to the Nucleus	-0.133664	-0.031944	-0.0910786	-0.156151	-0.11591	-0.114931
R-HSA-196741	Cobalamin (Cbl, vitamin B12) transport and metabolism	-0.072976	0.0896080075009781	-0.00493518	-0.030075	0.0302489573035303	-0.0611263
R-HSA-9758881	Uptake of dietary cobalamins into enterocytes	0.588267623377664	0.543719179333324	0.467680714372866	0.620121910420934	0.601328497803463	0.581755155953837
R-HSA-9758890	Transport of RCbl within the body	-0.110401	0.0825810918919671	-0.0790528	-0.0427843	0.004381510509292	-0.0473783
R-HSA-2162123	Synthesis of Prostaglandins (PG) and Thromboxanes (TX)	0.0756857738128409	0.10535036996273	0.138328136493223	0.0648348077604889	0.13715857775856	0.122031893925525
R-HSA-3214841	PKMTs methylate histone lysines	-0.207233	-0.204824	-0.125946	-0.279726	-0.261999	-0.211482
R-HSA-8936459	RUNX1 regulates genes involved in megakaryocyte differentiation and platelet function	-0.207124	-0.20244	-0.0847416	-0.302013	-0.255159	-0.185047
R-HSA-419771	Opsins	0.271376558943579	-0.243487	-0.369242	-0.120414	-0.15079	-0.199796
R-HSA-111458	Formation of apoptosome	-0.189956	-0.177845	-0.176957	-0.181656	-0.17212	-0.14534
R-HSA-111459	Activation of caspases through apoptosome-mediated cleavage	-0.24923	-0.300815	-0.00345998	-0.25543	-0.198761	-0.261892
R-HSA-111461	Cytochrome c-mediated apoptotic response	-0.220174	-0.20903	-0.165754	-0.203636	-0.201126	-0.172942
R-HSA-111463	SMAC (DIABLO) binds to IAPs	-0.227371	-0.279224	-0.0576775	-0.214369	-0.185947	-0.241193
R-HSA-111464	SMAC(DIABLO)-mediated dissociation of IAP:caspase complexes	-0.227371	-0.279224	-0.0576775	-0.214369	-0.185947	-0.241193
R-HSA-111469	SMAC, XIAP-regulated apoptotic response	-0.226423	-0.276398	-0.0564001	-0.21342	-0.184041	-0.238968
R-HSA-111471	Apoptotic factor-mediated response	-0.20774	-0.237651	-0.146328	-0.227961	-0.191147	-0.185415
R-HSA-6803207	TP53 Regulates Transcription of Caspase Activators and Caspases	-0.168319	-0.16883	-0.113877	-0.175796	-0.180292	-0.165078
R-HSA-9627069	Regulation of the apoptosome activity	-0.189956	-0.177845	-0.176957	-0.181656	-0.17212	-0.14534
R-HSA-1483249	Inositol phosphate metabolism	-0.138864	-0.0303684	-0.00960601	-0.114755	-0.0825703	-0.147939
R-HSA-1855183	Synthesis of IP2, IP, and Ins in the cytosol	-0.12718	-0.0678114	0.00278532196877318	-0.00220893	-0.0668729	-0.104193
R-HSA-450294	MAP kinase activation	-0.254141	-0.210537	-0.192673	-0.276292	-0.251517	-0.243062
R-HSA-450321	JNK (c-Jun kinases) phosphorylation and activation mediated by activated human TAK1	-0.264469	-0.191192	-0.141556	-0.311302	-0.273707	-0.253785
R-HSA-192105	Synthesis of bile acids and bile salts	-0.0887354	-0.143894	0.0536455190151862	-0.129616	-0.154477	-0.0732132
R-HSA-193368	Synthesis of bile acids and bile salts via 7alpha-hydroxycholesterol	-0.077961	-0.16556	-0.015425	-0.119423	-0.145923	-0.0575099
R-HSA-194068	Bile acid and bile salt metabolism	-0.151683	-0.169247	-0.0449897	-0.136099	-0.15748	-0.146958
R-HSA-2046104	alpha-linolenic (omega3) and linoleic (omega6) acid metabolism	-0.0596599	-0.0594627	0.0433157746040833	-0.0527422	-0.082605	-0.069909
R-HSA-2046106	alpha-linolenic acid (ALA) metabolism	-0.0596599	-0.0594627	0.0433157746040833	-0.0527422	-0.082605	-0.069909
R-HSA-389887	Beta-oxidation of pristanoyl-CoA	0.167325691458079	-0.00921495	0.287046001559804	0.103984665623401	0.205522605269214	0.157702618437397
R-HSA-390247	Beta-oxidation of very long chain fatty acids	-0.0338475	-0.0927434	-0.119956	-0.00184618	-0.0632636	-0.0556296
R-HSA-6804760	Regulation of TP53 Activity through Methylation	-0.221324	-0.218927	-0.0581828	-0.294499	-0.281751	-0.20608
R-HSA-9825895	Regulation of MITF-M-dependent genes involved in DNA replication, damage repair and senescence	-0.0746932	-0.0374137	0.0777644107114232	-0.119677	-0.0799713	-0.146329
R-HSA-2453902	The canonical retinoid cycle in rods (twilight vision)	-0.0751275	0.0856776777033263	-0.045751	-0.0608703	-0.0109361	-0.108105
R-HSA-5693579	Homologous DNA Pairing and Strand Exchange	-0.120367	-0.127842	-0.0662943	-0.140528	-0.140081	-0.088147
R-HSA-5693607	Processing of DNA double-strand break ends	-0.169459	-0.209134	-0.0720065	-0.263616	-0.23779	-0.166719
R-HSA-5693616	Presynaptic phase of homologous DNA pairing and strand exchange	-0.120336	-0.130506	-0.0589733	-0.141347	-0.140615	-0.087623
R-HSA-75035	Chk1/Chk2(Cds1) mediated inactivation of Cyclin B:Cdk1 complex	-0.167953	-0.0791599	-0.121753	-0.1722	-0.143966	-0.171624
R-HSA-2514856	The phototransduction cascade	-0.083149	-0.0580985	0.0427551901750905	-0.214676	-0.173556	-0.056508
R-HSA-2514859	Inactivation, recovery and regulation of the phototransduction cascade	-0.0881863	-0.0603229	0.0419478426066348	-0.223505	-0.179155	-0.0591308
R-HSA-194306	Neurophilin interactions with VEGF and VEGFR	-0.0870451	0.190317666124904	-0.126654	-0.13728	-0.17115	-0.161257
R-HSA-399954	Sema3A PAK dependent Axon repulsion	-0.250901	-0.17058	-0.0835816	-0.246538	-0.196613	-0.151482
R-HSA-399955	SEMA3A-Plexin repulsion signaling by inhibiting Integrin adhesion	-0.381083	-0.2012	-0.0907458	-0.373356	-0.319421	-0.24653
R-HSA-445144	Signal transduction by L1	-0.304203	-0.118326	-0.0620279	-0.34002	-0.30012	-0.255528
R-HSA-5676594	TNF receptor superfamily (TNFSF) members mediating non-canonical NF-kB pathway	0.110577297015478	-0.0595619	0.0947630762074372	-0.0602821	-0.029164	0.11831122274921
R-HSA-9617828	FOXO-mediated transcription of cell cycle genes	-0.240705	-0.161095	-0.125173	-0.252946	-0.250781	-0.232584
R-HSA-181429	Serotonin Neurotransmitter Release Cycle	-0.0941799	-0.0691655	-0.14098	-0.0503482	-0.0246802	-0.0192916
R-HSA-181430	Norepinephrine Neurotransmitter Release Cycle	-0.0901314	-0.0651273	-0.137743	-0.0458017	-0.0211473	-0.0165847
R-HSA-212676	Dopamine Neurotransmitter Release Cycle	-0.0204453	0.0229369349376907	-0.0604857	0.0264683419046676	0.0379738861398629	0.038634109682447
R-HSA-264642	Acetylcholine Neurotransmitter Release Cycle	-0.138755	-0.105698	-0.160896	-0.0978233	-0.0666996	-0.0579462
R-HSA-1834949	Cytosolic sensors of pathogen-associated DNA	-0.23316	-0.191878	-0.109722	-0.263209	-0.244168	-0.206444
R-HSA-73780	RNA Polymerase III Chain Elongation	-0.143631	-0.153319	-0.0575151	-0.127542	-0.132655	-0.135017
R-HSA-375280	Amine ligand-binding receptors	-0.177354	-0.0814677	-0.0667264	-0.126004	0.0476534726324246	-0.100519
R-HSA-5673000	RAF activation	-0.165526	-0.151257	-0.17104	-0.187284	-0.148672	-0.178573
R-HSA-888590	GABA synthesis, release, reuptake and degradation	-0.187578	-0.0998332	-0.106764	-0.154997	-0.0886472	-0.146314
R-HSA-9912633	Antigen processing: Ub, ATP-independent proteasomal degradation	-0.160287	-0.219773	-0.0391728	-0.169871	-0.181057	-0.162591
R-HSA-442742	CREB1 phosphorylation through NMDA receptor-mediated activation of RAS signaling	-0.106353	-0.0738928	-0.171877	-0.0781341	-0.107417	-0.0473821
R-HSA-442982	Ras activation upon Ca2+ influx through NMDA receptor	0.0440064501225454	0.0327423837260641	-0.0362489	0.0656556699463725	0.0389947647454238	0.0356878166649268
R-HSA-389599	Alpha-oxidation of phytanate	0.055230274878082	-0.02143	-0.0787924	0.129450301764768	0.0993942116724263	0.145597298306805
R-HSA-400451	Free fatty acids regulate insulin secretion	-0.241819	0.116515721815725	0.349019519280243	-0.197711	-0.0714883	-0.104434
R-HSA-400511	Synthesis, secretion, and inactivation of Glucose-dependent Insulinotropic Polypeptide (GIP)	-0.0339155	-0.062059	0.0719446340093017	-0.0921661	-0.119362	-0.126148
R-HSA-434316	Fatty Acids bound to GPR40 (FFAR1) regulate insulin secretion	-0.101508	-0.157912	0.0316424391095995	-0.0714699	-0.101488	0.202590075475482
R-HSA-622312	Inflammasomes	-0.291242	-0.131639	-0.101073	-0.294379	-0.255802	-0.247363
R-HSA-844615	The AIM2 inflammasome	-0.0269754	-0.0949276	0.129625095907228	0.05289466162838	0.0171937475010332	-0.0409989
R-HSA-9707587	Regulation of HMOX1 expression and activity	-0.19964	-0.213758	-0.0998915	-0.274219	-0.158355	-0.281333
R-HSA-9708530	Regulation of BACH1 activity	-0.154819	-0.190995	-0.140151	-0.192371	-0.153908	-0.173151
R-HSA-9818027	NFE2L2 regulating anti-oxidant/detoxification enzymes	-0.255136	-0.0846666	-0.0931005	-0.269742	-0.224158	-0.217448
R-HSA-70895	Branched-chain amino acid catabolism	-0.261617	-0.15255	-0.0298851	-0.293937	-0.317771	-0.254479
R-HSA-3772470	Negative regulation of TCF-dependent signaling by WNT ligand antagonists	-0.201443	0.0957597748683504	-0.185066	-0.149529	-0.111646	-0.210917
R-HSA-5666185	RHO GTPases Activate Rhotekin and Rhophilins	-0.113326	-0.118797	-0.0108026	-0.157023	-0.159447	-0.168455
R-HSA-190242	FGFR1 ligand binding and activation	-0.181827	0.0878452494876598	-0.289814	-0.111603	-0.0505746	-0.0891912
R-HSA-190370	FGFR1b ligand binding and activation	-0.157988	0.205755938930839	-0.234754	-0.0882055	0.00103338162433739	-0.0341616
R-HSA-190373	FGFR1c ligand binding and activation	-0.353041	0.0760086857206624	-0.376255	-0.285974	-0.198542	-0.212381
R-HSA-5654736	Signaling by FGFR1	-0.184245	-0.121895	-0.155782	-0.18674	-0.16508	-0.154285
R-HSA-9839373	Signaling by TGFBR3	-0.250573	-0.0619268	-0.140076	-0.256799	-0.23481	-0.213654
R-HSA-9839389	TGFBR3 regulates TGF-beta signaling	-0.251564	-0.115274	-0.0955129	-0.235588	-0.264404	-0.161851
R-HSA-9839397	TGFBR3 regulates FGF2 signaling	-0.385936	0.143377421155495	-0.351255	-0.322928	-0.164152	-0.179224
R-HSA-1606322	ZBP1(DAI) mediated induction of type I IFNs	-0.286036	-0.200895	-0.146443	-0.298238	-0.262305	-0.267621
R-HSA-168638	NOD1/2 Signaling Pathway	-0.178527	-0.237533	-0.0513079	-0.334895	-0.308294	-0.182149
R-HSA-168927	TICAM1, RIP1-mediated IKK complex recruitment	-0.217859	-0.189016	-0.164924	-0.258087	-0.212318	-0.216411
R-HSA-1810476	RIP-mediated NFkB activation via ZBP1	-0.28887	-0.197238	-0.14394	-0.309683	-0.305896	-0.287044
R-HSA-193639	p75NTR signals via NF-kB	-0.266268	-0.243155	-0.122496	-0.284217	-0.259945	-0.261455
R-HSA-209543	p75NTR recruits signalling complexes	-0.249539	-0.248635	-0.103699	-0.288361	-0.244042	-0.248514
R-HSA-209560	NF-kB is activated and signals survival	-0.270774	-0.242042	-0.132472	-0.293107	-0.265457	-0.26486
R-HSA-5357956	TNFR1-induced NF-kappa-B signaling pathway	0.0551026793830484	-0.170552	0.066726360786504	-0.165461	-0.145376	0.0610421522813488
R-HSA-5684264	MAP3K8 (TPL2)-dependent MAPK1/3 activation	-0.207447	-0.217325	-0.153547	-0.249626	-0.208911	-0.204297
R-HSA-933542	TRAF6 mediated NF-kB activation	-0.258311	-0.119261	-0.0806114	-0.239259	-0.231016	-0.218793
R-HSA-933543	NF-kB activation through FADD/RIP-1 pathway mediated by caspase-8 and -10	-0.221536	-0.207755	-0.116215	-0.337431	-0.292034	-0.242466
R-HSA-937039	IRAK1 recruits IKK complex	-0.244026	-0.191589	-0.142442	-0.290758	-0.27483	-0.240606
R-HSA-975144	IRAK1 recruits IKK complex upon TLR7/8 or 9 stimulation	-0.244026	-0.191589	-0.142442	-0.290758	-0.27483	-0.240606
R-HSA-9758274	Regulation of NF-kappa B signaling	-0.174084	-0.172537	-0.121205	-0.184396	-0.170505	-0.177262
R-HSA-9860276	SLC15A4:TASL-dependent IRF5 activation	-0.166246	-0.135645	-0.138869	-0.261041	-0.204703	-0.166103
R-HSA-9860927	Turbulent (oscillatory, disturbed) flow shear stress activates signaling by PIEZO1 and integrins in endothelial cells	-0.256639	-0.0547097	-0.140261	-0.25523	-0.246756	-0.208496
R-HSA-9909505	Modulation of host responses by IFN-stimulated genes	-0.191722	-0.100731	-0.146683	-0.220252	-0.218953	-0.179806
R-HSA-1268020	Mitochondrial protein import	-0.198693	-0.202328	0.00411902034828632	-0.227346	-0.156443	-0.207313
R-HSA-3214847	HATs acetylate histones	-0.170962	-0.158061	-0.121996	-0.160281	-0.172854	-0.139895
R-HSA-110313	Translesion synthesis by Y family DNA polymerases bypasses lesions on DNA template	-0.250563	-0.252197	-0.0890766	-0.298529	-0.269814	-0.223583
R-HSA-5656169	Termination of translesion DNA synthesis	-0.255296	-0.275779	-0.111971	-0.311835	-0.275544	-0.218963
R-HSA-73893	DNA Damage Bypass	-0.250672	-0.239097	-0.107197	-0.300701	-0.266636	-0.221248
R-HSA-936440	Negative regulators of DDX58/IFIH1 signaling	-0.23074	-0.232389	-0.131344	-0.250784	-0.229808	-0.220493
R-HSA-3000170	Syndecan interactions	-0.182811	0.163705324665983	-0.0561936	-0.172883	-0.18723	-0.135381
R-HSA-1483148	Synthesis of PG	-0.225573	-0.0668527	0.224178588959935	-0.200446	-0.127314	-0.195156
R-HSA-1483166	Synthesis of PA	0.0994410767014228	0.0143156648761185	0.160216983146998	0.0483837230499665	0.134669881168163	0.130157532686126
R-HSA-179812	GRB2 events in EGFR signaling	-0.364014	-0.129157	-0.0764088	-0.371761	-0.340563	-0.327362
R-HSA-180292	GAB1 signalosome	-0.330461	-0.100662	-0.065982	-0.342815	-0.310756	-0.290473
R-HSA-180336	SHC1 events in EGFR signaling	-0.347891	-0.116043	-0.0791525	-0.35744	-0.325285	-0.313296
R-HSA-182971	EGFR downregulation	-0.23833	-0.113884	-0.0473112	-0.257208	-0.245132	-0.198361
R-HSA-212718	EGFR interacts with phospholipase C-gamma	-0.365466	-0.0977259	-0.0533162	-0.379236	-0.341496	-0.327635
R-HSA-9634638	Estrogen-dependent nuclear events downstream of ESR-membrane signaling	-0.297327	-0.157913	-0.109237	-0.322605	-0.301131	-0.244273
R-HSA-9837999	Mitochondrial protein degradation	-0.226643	-0.256712	0.000979654913056516	-0.262372	-0.222218	-0.203707
R-HSA-3928663	EPHA-mediated growth cone collapse	-0.257147	-0.16446	-0.038204	-0.256181	-0.249715	-0.243646
R-HSA-400685	Sema4D in semaphorin signaling	-0.312951	-0.196426	0.000772221233491799	-0.307979	-0.297744	-0.272765
R-HSA-416572	Sema4D induced cell migration and growth-cone collapse	-0.30916	-0.173569	0.00877430555629094	-0.317954	-0.314805	-0.304561
R-HSA-445355	Smooth Muscle Contraction	-0.261903	-0.0251408	-0.0231649	-0.244095	-0.217701	-0.177806
R-HSA-5627117	RHO GTPases Activate ROCKs	-0.243933	-0.161027	0.0150608661174045	-0.230109	-0.285094	-0.270984
R-HSA-5627123	RHO GTPases activate PAKs	-0.197511	-0.114348	0.0408575446594907	-0.160887	-0.206195	-0.121672
R-HSA-6807004	Negative regulation of MET activity	-0.182907	-0.102223	-0.0888673	-0.170394	-0.169111	-0.141858
R-HSA-9706019	RHOBTB3 ATPase cycle	-0.104199	-0.0441022	-0.00844226	-0.117447	-0.115065	-0.0839897
R-HSA-6804114	TP53 Regulates Transcription of Genes Involved in G2 Cell Cycle Arrest	-0.234535	-0.221789	-0.112501	-0.256378	-0.251842	-0.230422
R-HSA-8854521	Interaction between PHLDA1 and AURKA	-0.109565	-0.191707	-0.0806195	-0.199572	-0.216835	-0.158701
R-HSA-193775	Synthesis of bile acids and bile salts via 24-hydroxycholesterol	0.0602666885785183	0.0493004421359671	0.0957688779208875	0.11170499140288	0.0838006992657743	0.108270408640851
R-HSA-2173788	Downregulation of TGF-beta receptor signaling	-0.282021	-0.238832	-0.148925	-0.322204	-0.283963	-0.252828
R-HSA-2173789	TGF-beta receptor signaling activates SMADs	-0.221364	-0.183331	-0.103156	-0.316017	-0.284502	-0.202923
R-HSA-450520	HuR (ELAVL1) binds and stabilizes mRNA	-0.205391	-0.23777	-0.0382182	-0.343199	-0.290381	-0.129447
R-HSA-69273	Cyclin A/B1/B2 associated events during G2/M transition	-0.17845	-0.157867	-0.203504	-0.171813	-0.162118	-0.183459
R-HSA-418359	Reduction of cytosolic Ca++ levels	-0.372967	0.00425076172164601	-0.0525631	-0.328078	-0.125173	-0.379895
R-HSA-418360	Platelet calcium homeostasis	-0.287112	-0.018961	-0.13102	-0.236726	-0.0843015	-0.295346
R-HSA-445095	Interaction between L1 and Ankyrins	-0.0641146	0.0641951729652135	0.0811491053487663	-0.0315606	-0.0634055	0.0908422832353805
R-HSA-416700	Other semaphorin interactions	-0.236826	0.268142801586018	-0.027196	-0.18258	-0.147164	-0.151617
R-HSA-9821002	Chromatin modifications during the maternal to zygotic transition (MZT)	-0.143494	-0.298767	0.0399413351767821	-0.359214	-0.262214	-0.107629
R-HSA-9931530	Phosphorylation and nuclear translocation of the CRY:PER:kinase complex	-0.149749	-0.184459	-0.0531007	-0.241536	-0.241495	-0.163489
R-HSA-73817	Purine ribonucleoside monophosphate biosynthesis	-0.0982868	0.187397423362812	-0.120305	-0.0599835	-0.0820054	0.0237135204355377
R-HSA-8956320	Nucleotide biosynthesis	-0.182489	0.0306740170522812	-0.0241273	-0.176062	-0.199112	-0.0905844
R-HSA-6785470	tRNA processing in the mitochondrion	-0.247186	-0.302636	0.0625572434716136	-0.444929	-0.471087	-0.450434
R-HSA-6787450	tRNA modification in the mitochondrion	-0.158505	-0.206935	-0.12773	-0.16927	-0.129307	-0.210158
R-HSA-8868766	rRNA processing in the mitochondrion	-0.221443	-0.184419	-0.024396	-0.226536	-0.198709	-0.248956
R-HSA-2173795	Downregulation of SMAD2/3:SMAD4 transcriptional activity	-0.26701	-0.214553	-0.158229	-0.300035	-0.280355	-0.259956
R-HSA-198323	AKT phosphorylates targets in the cytosol	-0.149729	-0.262718	-0.0589576	-0.289163	-0.249343	-0.167612
R-HSA-430039	mRNA decay by 5' to 3' exoribonuclease	-0.256141	-0.565277	0.124238786650204	-0.612737	-0.517558	-0.311874
R-HSA-174824	Plasma lipoprotein assembly, remodeling, and clearance	-0.253094	-0.133705	-0.0861357	-0.261246	-0.216901	-0.227193
R-HSA-8964038	LDL clearance	-0.18695	-0.0264663	0.121966724711884	-0.209662	-0.20635	-0.152491
R-HSA-8964043	Plasma lipoprotein clearance	-0.227383	-0.11261	-0.0683454	-0.25077	-0.223232	-0.203101
R-HSA-389397	Orexin and neuropeptides FF and QRFP bind to their respective receptors	-0.00688156	0.27656426327748	0.157590103398642	-0.213948	-0.2169	-0.0166782
R-HSA-73762	RNA Polymerase I Transcription Initiation	-0.196196	-0.188036	-0.146248	-0.243674	-0.24611	-0.216155
R-HSA-73772	RNA Polymerase I Promoter Escape	-0.152846	-0.223783	-0.0852545	-0.261475	-0.233499	-0.156901
R-HSA-73854	RNA Polymerase I Promoter Clearance	-0.189437	-0.22189	-0.107427	-0.274346	-0.259028	-0.186833
R-HSA-73863	RNA Polymerase I Transcription Termination	-0.119927	-0.164073	-0.101432	-0.191143	-0.18936	-0.14397
R-HSA-73864	RNA Polymerase I Transcription	-0.184158	-0.21266	-0.104775	-0.267747	-0.252162	-0.17693
R-HSA-196299	Beta-catenin phosphorylation cascade	-0.228841	-0.201191	-0.194859	-0.224942	-0.16713	-0.236511
R-HSA-8931987	RUNX1 regulates estrogen receptor mediated transcription	-0.123499	-0.332527	0.124453432294266	-0.461614	-0.457908	-0.110783
R-HSA-8939256	RUNX1 regulates transcription of genes involved in WNT signaling	-0.128619	-0.332517	0.116932409125021	-0.481861	-0.4772	-0.114165
R-HSA-9733709	Cardiogenesis	-0.177628	-0.146723	-0.136381	-0.186288	-0.16662	-0.142253
R-HSA-9754189	Germ layer formation at gastrulation	-0.225223	-0.0911648	-0.107125	-0.227972	-0.213938	-0.196204
R-HSA-9758919	Epithelial-Mesenchymal Transition (EMT) during gastrulation	0.011492197276071	0.0451674637319042	-0.165702	-0.0896914	-0.111036	-0.0735278
R-HSA-9823730	Formation of definitive endoderm	-0.185869	-0.0261605	-0.10641	-0.215067	-0.196326	-0.168427
R-HSA-389957	Prefoldin mediated transfer of substrate to CCT/TriC	-0.273841	-0.200031	-0.0484738	-0.26687	-0.238934	-0.182298
R-HSA-71240	Tryptophan catabolism	0.0140959871225884	0.187566153499283	0.375226159168848	-0.000647843	-0.0300172	-0.0826043
R-HSA-3000157	Laminin interactions	-0.139386	0.442313803141541	0.010944506686591	-0.0377004	-0.0677631	-0.131545
R-HSA-8874081	MET activates PTK2 signaling	-0.239331	0.197722238000873	-0.0178925	-0.220331	-0.242767	-0.249266
R-HSA-8875878	MET promotes cell motility	-0.259115	0.060822742181398	-0.039585	-0.247927	-0.243278	-0.236884
R-HSA-927802	Nonsense-Mediated Decay (NMD)	-0.102486	-0.356478	0.0011898921177434	-0.436691	-0.392679	-0.121616
R-HSA-975957	Nonsense Mediated Decay (NMD) enhanced by the Exon Junction Complex (EJC)	-0.102486	-0.356478	0.0011898921177434	-0.436691	-0.392679	-0.121616
R-HSA-5368286	Mitochondrial translation initiation	-0.226827	-0.244692	-0.117149	-0.339888	-0.303717	-0.248197
R-HSA-5389840	Mitochondrial translation elongation	-0.244104	-0.239311	-0.0998947	-0.348701	-0.334496	-0.250108
R-HSA-5419276	Mitochondrial translation termination	-0.281836	-0.314801	-0.0164562	-0.389461	-0.377886	-0.29311
R-HSA-112311	Neurotransmitter clearance	-0.0587623	-0.0229804	0.0937155027532632	-0.0404235	0.00779196702541085	0.000206626107608965
R-HSA-2161517	Abacavir transmembrane transport	-0.036869	0.269121745409766	0.130294490780566	0.028211934622662	0.539161669352977	-0.0449343
R-HSA-2161522	Abacavir ADME	-0.0973496	0.0880346337092688	0.187440044475381	-0.0257943	0.318432723383851	-0.1072
R-HSA-425366	Transport of bile salts and organic acids, metal ions and amine compounds	-0.0631445	-0.0252976	-0.112762	-0.0483568	0.0455657140223721	-0.0760456
R-HSA-442660	Na+/Cl- dependent neurotransmitter transporters	0.0668318134426675	0.0344181485660466	-0.0894953	0.0848041422759001	0.197222798874476	0.0722883705371243
R-HSA-549127	Organic cation transport	-0.0857318	-0.0373504	-0.275001	-0.0236114	0.044509331505395	-0.0966349
R-HSA-549132	Organic cation/anion/zwitterion transport	-0.0857318	-0.0373504	-0.275001	-0.0236114	0.044509331505395	-0.0966349
R-HSA-9793528	Ciprofloxacin ADME	-0.276141	-0.309451	-0.172349	-0.251961	0.227788272160702	0.0380242910808332
R-HSA-167044	Signalling to RAS	-0.241374	-0.18072	-0.0783879	-0.275306	-0.276322	-0.268904
R-HSA-171007	p38MAPK events	-0.257788	-0.279266	-0.058471	-0.294233	-0.280418	-0.256902
R-HSA-187687	Signalling to ERKs	-0.189343	-0.1318	-0.174329	-0.178369	-0.147203	-0.179988
R-HSA-390522	Striated Muscle Contraction	-0.0896469	0.0195055535046889	0.109501223494305	-0.0946247	-0.0509157	-0.0473629
R-HSA-2142770	Synthesis of 15-eicosatetraenoic acid derivatives	0.577079066946872	0.650228133749531	0.586706111310807	-0.00411464	-0.0305133	0.15262833810295
R-HSA-446205	Synthesis of GDP-mannose	-0.167679	-0.22002	-0.123169	-0.0881503	-0.125259	-0.176868
R-HSA-5693554	Resolution of D-loop Structures through Synthesis-Dependent Strand Annealing (SDSA)	-0.175125	-0.169405	-0.0864615	-0.185841	-0.190968	-0.123231
R-HSA-1222556	ROS and RNS production in phagocytes	-0.177052	-0.214782	0.101889967776925	-0.186719	-0.209881	-0.139633
R-HSA-77387	Insulin receptor recycling	-0.171953	-0.115439	-0.0615567	-0.199685	-0.147065	-0.100591
R-HSA-917937	Iron uptake and transport	-0.109614	-0.216037	-0.0546394	-0.24282	-0.206198	-0.12892
R-HSA-917977	Transferrin endocytosis and recycling	-0.134717	-0.16196	-0.0514666	-0.191537	-0.136692	-0.135098
R-HSA-9857377	Regulation of MITF-M-dependent genes involved in lysosome biogenesis and autophagy	-0.08725	-0.270256	-0.0445387	-0.175127	-0.139834	-0.0779977
R-HSA-114452	Activation of BH3-only proteins	-0.185908	-0.122999	-0.0993913	-0.211427	-0.193612	-0.173027
R-HSA-139915	Activation of PUMA and translocation to mitochondria	-0.226682	-0.242097	-0.0882643	-0.250924	-0.282214	-0.218178
R-HSA-6803204	TP53 Regulates Transcription of Genes Involved in Cytochrome C Release	-0.210868	-0.190236	-0.0744727	-0.225243	-0.231927	-0.230087
R-HSA-6803205	TP53 regulates transcription of several additional cell death genes whose specific roles in p53-dependent apoptosis remain uncertain	-0.199351	-0.198063	-0.0795613	-0.205646	-0.223987	-0.194701
R-HSA-6804759	Regulation of TP53 Activity through Association with Co-factors	-0.209609	-0.185964	-0.0668594	-0.252163	-0.248873	-0.208749
R-HSA-1855204	Synthesis of IP3 and IP4 in the cytosol	-0.12008	-0.0640294	0.0124412521080073	-0.150804	-0.174997	-0.161306
R-HSA-193670	p75NTR negatively regulates cell cycle via SC1	-0.289334	-0.245007	-0.208054	-0.305322	-0.330781	-0.311144
R-HSA-2122947	NOTCH1 Intracellular Domain Regulates Transcription	-0.295037	-0.256185	-0.177172	-0.323409	-0.308145	-0.303871
R-HSA-350054	Notch-HLH transcription pathway	-0.299977	-0.20987	-0.160926	-0.343196	-0.342803	-0.307823
R-HSA-8940973	RUNX2 regulates osteoblast differentiation	-0.281359	-0.117587	-0.170537	-0.276015	-0.259495	-0.255286
R-HSA-8941326	RUNX2 regulates bone development	-0.253794	-0.114451	-0.166276	-0.248935	-0.23332	-0.226347
R-HSA-9029569	NR1H3 & NR1H2 regulate gene expression linked to cholesterol transport and efflux	-0.23203	-0.161551	-0.0988226	-0.289643	-0.224001	-0.243695
R-HSA-9701898	STAT3 nuclear events downstream of ALK signaling	-0.28025	-0.260919	-0.14416	-0.318328	-0.310532	-0.265342
R-HSA-9933387	RORA,B,C and NR1D1 (REV-ERBA) regulate gene expression	-0.376431	-0.219447	-0.209448	-0.387319	-0.380457	-0.383387
R-HSA-438066	Unblocking of NMDA receptors, glutamate binding and activation	0.0838512107551007	0.0297771650655345	0.0631629601190704	0.0698395226615291	0.0594314064724757	0.0830449505384864
R-HSA-8849932	Synaptic adhesion-like molecules	-0.0240407	0.0065928454466973	0.0666417328987478	-0.0620331	-0.0666833	-0.00909856
R-HSA-9617324	Negative regulation of NMDA receptor-mediated neuronal transmission	0.0643388531488677	0.00832881294848037	0.0374834552066355	0.0538492746137111	0.0542849414179931	0.0629133952328895
R-HSA-9620244	Long-term potentiation	0.0305844148377891	0.00381661059464783	0.022444703925773	0.0136191944033635	0.00483662595031256	0.0424802386291237
R-HSA-210991	Basigin interactions	-0.21592	0.0350677647435315	-0.00494132	-0.237154	-0.210152	-0.213572
R-HSA-433692	Proton-coupled monocarboxylate transport	-0.295071	-0.0902066	-0.0222486	-0.27399	-0.0226724	-0.303317
R-HSA-425410	Metal ion SLC transporters	-0.00952012	0.0342663082138518	-0.0380461	0.00235996870095473	0.0670042179371553	0.00397108016493591
R-HSA-159418	Recycling of bile acids and salts	-0.29842	-0.271742	-0.154508	-0.292004	-0.278517	-0.279732
R-HSA-9818032	NFE2L2 regulating MDR associated enzymes	-0.312938	-0.0694159	-0.15426	-0.284934	-0.214259	-0.260158
R-HSA-9748787	Azathioprine ADME	-0.223388	-0.127944	0.0198590489327281	-0.234219	-0.084447	-0.16987
R-HSA-1679131	Trafficking and processing of endosomal TLR	-0.214942	-0.123842	0.0950906867565247	-0.234763	-0.228047	-0.236614
R-HSA-9013957	TLR3-mediated TICAM1-dependent programmed cell death	-0.181629	-0.110768	0.0705403670440793	-0.350637	-0.322623	-0.281474
R-HSA-9013973	TICAM1-dependent activation of IRF3/IRF7	-0.205069	-0.193303	-0.10329	-0.222838	-0.173714	-0.161416
R-HSA-9014325	TICAM1,TRAF6-dependent induction of TAK1 complex	-0.281078	-0.23892	-0.164928	-0.309629	-0.270077	-0.23661
R-HSA-9828211	Regulation of TBK1, IKK蔚-mediated activation of IRF3, IRF7 upon TLR3 ligation	-0.19977	-0.185329	-0.0952119	-0.220862	-0.168301	-0.154092
R-HSA-912446	Meiotic recombination	-0.107354	-0.168263	0.0139139840317571	-0.205202	-0.163083	-0.0800918
R-HSA-1660662	Glycosphingolipid metabolism	-0.17831	-0.00863435	0.0456844214429298	-0.137283	-0.122184	-0.189122
R-HSA-4085001	Sialic acid metabolism	-0.139594	-0.0339898	-0.073422	-0.226115	-0.168469	-0.17495
R-HSA-9840309	Glycosphingolipid biosynthesis	0.121001446767515	0.180845268277686	0.235108564979603	0.157108400138652	0.176430628842716	0.0858412867469734
R-HSA-3322077	Glycogen synthesis	-0.243722	-0.239805	-0.0981277	-0.297826	-0.255646	-0.220952
R-HSA-70221	Glycogen breakdown (glycogenolysis)	-0.0180738	0.218879805087993	0.164328849591933	0.0316963544020585	0.014940684792301	-0.0276429
R-HSA-8982491	Glycogen metabolism	-0.249641	-0.217027	-0.0864715	-0.298786	-0.259233	-0.22853
R-HSA-1482788	Acyl chain remodelling of PC	0.069203689259844	-0.00242998	-0.0196065	-0.0106332	0.0274960757225104	0.0602118738796678
R-HSA-1482801	Acyl chain remodelling of PS	0.215464433604009	0.0544918279157078	0.291261080745523	0.164434528405257	0.147675175192017	0.316922787830768
R-HSA-1482839	Acyl chain remodelling of PE	0.122058667903254	-0.0148455	0.0508005253143617	0.0565047125782061	0.0284160622959301	0.107282025627528
R-HSA-1482922	Acyl chain remodelling of PI	0.254791268634522	0.0483272237865403	0.152572522550337	0.174492765696945	0.306471379600866	0.24571993919054
R-HSA-1482925	Acyl chain remodelling of PG	0.413108652331856	0.250456930466946	0.27139522449633	0.314993006571839	0.341636656260931	0.407949352195505
R-HSA-203927	MicroRNA (miRNA) biogenesis	-0.231711	-0.321669	-0.184488	-0.336485	-0.285377	-0.238333
R-HSA-5601884	PIWI-interacting RNA (piRNA) biogenesis	-0.277779	-0.245914	-0.230125	-0.264434	-0.250919	-0.219307
R-HSA-5654738	Signaling by FGFR2	-0.262315	-0.180546	-0.180929	-0.278518	-0.259133	-0.22552
R-HSA-6781823	Formation of TC-NER Pre-Incision Complex	-0.326462	-0.25335	-0.196363	-0.325855	-0.312407	-0.316039
R-HSA-6781827	Transcription-Coupled Nucleotide Excision Repair (TC-NER)	-0.304663	-0.251543	-0.165982	-0.308681	-0.292257	-0.274014
R-HSA-6782135	Dual incision in TC-NER	-0.286498	-0.262631	-0.148874	-0.305303	-0.283182	-0.25193
R-HSA-6782210	Gap-filling DNA repair synthesis and ligation in TC-NER	-0.286056	-0.261545	-0.16226	-0.307572	-0.289301	-0.250146
R-HSA-6803529	FGFR2 alternative splicing	-0.398789	-0.277129	-0.155566	-0.414495	-0.39933	-0.363799
R-HSA-72165	mRNA Splicing - Minor Pathway	-0.333261	-0.376013	-0.148104	-0.418929	-0.399317	-0.341193
R-HSA-9670095	Inhibition of DNA recombination at telomere	-0.243828	-0.255297	-0.0410534	-0.335726	-0.298353	-0.221365
R-HSA-190241	FGFR2 ligand binding and activation	-0.112522	0.273291758483129	-0.21067	-0.0418865	-0.0776398	0.0832049104921502
R-HSA-190377	FGFR2b ligand binding and activation	-0.125863	0.378097890448876	-0.18776	-0.0566461	-0.0916811	0.127720786949946
R-HSA-5654219	Phospholipase C-mediated cascade: FGFR1	-0.126679	0.183716647360875	-0.0575198	-0.0640692	-0.0951981	-0.0684145
R-HSA-5654221	Phospholipase C-mediated cascade; FGFR2	-0.130114	0.2165651714843	-0.068684	-0.0676404	-0.0987327	-0.0743702
R-HSA-5654687	Downstream signaling of activated FGFR1	-0.0102521	0.0904864776799601	-0.0605278	0.0093220682628205	-0.0244389	0.00682475195718912
R-HSA-5654688	SHC-mediated cascade:FGFR1	-0.218181	-0.0231945	-0.259846	-0.160294	-0.188911	-0.179225
R-HSA-5654689	PI-3K cascade:FGFR1	-0.0850698	0.083291648349488	-0.0385602	-0.0624956	-0.0986942	-0.0573962
R-HSA-5654693	FRS-mediated FGFR1 signaling	-0.00511818	0.129910983022778	-0.0919082	0.00436902714031551	-0.00328151	0.0182413467264897
R-HSA-5654695	PI-3K cascade:FGFR2	-0.0824274	0.101886917116804	-0.0434608	-0.0558002	-0.0935454	-0.0564258
R-HSA-5654696	Downstream signaling of activated FGFR2	-0.0133361	0.0986739674918206	-0.0650749	0.00688639285736484	-0.027054	0.0036417539906731
R-HSA-5654699	SHC-mediated cascade:FGFR2	-0.217831	0.00786716752672323	-0.262142	-0.160986	-0.188548	-0.180183
R-HSA-5654700	FRS-mediated FGFR2 signaling	-0.00811416	0.139362736637714	-0.0974248	0.00544707918071918	-0.00404571	0.014625762016064
R-HSA-5654726	Negative regulation of FGFR1 signaling	-0.223008	-0.170415	-0.196791	-0.244261	-0.204497	-0.173926
R-HSA-5654727	Negative regulation of FGFR2 signaling	-0.224154	-0.165759	-0.198047	-0.245271	-0.205604	-0.175192
R-HSA-5658623	FGFRL1 modulation of FGFR1 signaling	-0.297022	-0.0150473	-0.0301806	-0.234519	-0.237587	-0.272905
R-HSA-9924644	Developmental Lineages of the Mammary Gland	-0.284423	-0.0544932	-0.0437616	-0.289191	-0.263135	-0.248913
R-HSA-9937080	Developmental Lineage of Multipotent Pancreatic Progenitor Cells	-0.00579169	0.186932024388514	-0.0681606	-0.063513	-0.0937533	-0.0147739
R-HSA-9938206	Developmental Lineage of Mammary Stem Cells	-0.292011	0.0575809519672675	-0.0851016	-0.326662	-0.294048	-0.283344
R-HSA-9818028	NFE2L2 regulates pentose phosphate pathway genes	-0.28627	-0.0881263	-0.117313	-0.247293	-0.212992	-0.236611
R-HSA-110330	Recognition and association of DNA glycosylase with site containing an affected purine	-0.192451	-0.305352	0.0683545790642429	-0.363638	-0.29881	-0.157432
R-HSA-73884	Base Excision Repair	-0.194375	-0.269319	0.00610353168935163	-0.294808	-0.238077	-0.163367
R-HSA-73927	Depurination	-0.192451	-0.305352	0.0683545790642429	-0.363638	-0.29881	-0.157432
R-HSA-73929	Base-Excision Repair, AP Site Formation	-0.215541	-0.299103	0.0572834619470556	-0.352317	-0.295531	-0.181461
R-HSA-110328	Recognition and association of DNA glycosylase with site containing an affected pyrimidine	-0.212358	-0.297176	0.0662706085936338	-0.352305	-0.294165	-0.177598
R-HSA-110329	Cleavage of the damaged pyrimidine	-0.212358	-0.297176	0.0662706085936338	-0.352305	-0.294165	-0.177598
R-HSA-110331	Cleavage of the damaged purine	-0.192451	-0.305352	0.0683545790642429	-0.363638	-0.29881	-0.157432
R-HSA-110357	Displacement of DNA glycosylase by APEX1	-0.447106	-0.337514	-0.12624	-0.419244	-0.345754	-0.452013
R-HSA-5649702	APEX1-Independent Resolution of AP Sites via the Single Nucleotide Replacement Pathway	-0.168703	-0.118011	-0.21759	-0.151287	-0.0421911	-0.144976
R-HSA-73928	Depyrimidination	-0.212358	-0.297176	0.0662706085936338	-0.352305	-0.294165	-0.177598
R-HSA-73933	Resolution of Abasic Sites (AP sites)	-0.217809	-0.183792	-0.0862213	-0.215091	-0.165747	-0.155434
R-HSA-196791	Vitamin D (calciferol) metabolism	-0.149255	-0.0565228	-0.136673	-0.113154	-0.118871	-0.123752
R-HSA-211916	Vitamins	0.57935393258427	0.539325842696629	0.478230337078652	0.606039325842697	0.58936095505618	0.573384831460674
R-HSA-165158	Activation of AKT2	-0.204987	-0.0766776	-0.140231	-0.186903	-0.248657	-0.0958154
R-HSA-354192	Integrin signaling	-0.222192	-0.0715414	-0.127086	-0.251777	-0.229449	-0.197461
R-HSA-444257	RSK activation	-0.336924	-0.18208	-0.273142	-0.345303	-0.334932	-0.162997
R-HSA-5218920	VEGFR2 mediated vascular permeability	-0.173089	-0.226878	-0.0475549	-0.299176	-0.2677	-0.149788
R-HSA-5218921	VEGFR2 mediated cell proliferation	-0.193677	-0.0699802	-0.100931	-0.251973	-0.260605	-0.124257
R-HSA-76009	Platelet Aggregation (Plug Formation)	-0.221832	-0.0510492	-0.10164	-0.252924	-0.233854	-0.199723
R-HSA-9634635	Estrogen-stimulated signaling through PRKCZ	-0.27299	-0.184869	-0.279282	-0.251993	-0.295243	-0.168336
R-HSA-983170	Antigen Presentation: Folding, assembly and peptide loading of class I MHC	-0.277538	-0.116202	-0.128333	-0.238673	-0.22514	-0.246604
R-HSA-9013508	NOTCH3 Intracellular Domain Regulates Transcription	-0.351054	-0.194938	-0.136263	-0.360239	-0.349837	-0.306159
R-HSA-139853	Elevation of cytosolic Ca2+ levels	-0.27586	-0.0217513	-0.231852	-0.214663	-0.13291	-0.286934
R-HSA-844456	The NLRP3 inflammasome	-0.28762	-0.121551	-0.0964791	-0.292914	-0.259212	-0.248505
R-HSA-1296052	Ca2+ activated K+ channels	0.319658024340495	0.279999104511741	0.532448146544303	0.32810105669827	0.358223859924944	0.311192450887583
R-HSA-5221030	TET1,2,3 and TDG demethylate DNA	-0.563148	-0.412616	-0.0867427	-0.549258	-0.458128	-0.567428
R-HSA-416550	Sema4D mediated inhibition of cell attachment and migration	-0.24888	-0.205965	-0.00430949	-0.280171	-0.260207	-0.272349
R-HSA-427359	SIRT1 negatively regulates rRNA expression	-0.0724617	-0.254461	-0.00935339	-0.305967	-0.237353	-0.0714866
R-HSA-203615	eNOS activation	-0.139742	-0.115545	-0.0877034	-0.206816	-0.104293	-0.114083
R-HSA-975576	N-glycan antennae elongation in the medial/trans-Golgi	-0.102612	-0.0858721	0.138660430965029	-0.0746369	-0.0654704	-0.0812798
R-HSA-975577	N-Glycan antennae elongation	0.0418589239390197	0.0851217715005451	0.238027644672847	0.00943065855475322	0.068653804282242	0.0894801230293247
R-HSA-5365859	RA biosynthesis pathway	-0.0800202	0.090201631278044	0.00759307552908134	0.0737514302349781	0.00103017762410201	-0.0800196
R-HSA-8941237	Invadopodia formation	-0.478594	-0.30593	0.400904680434742	-0.52245	-0.534317	-0.168282
R-HSA-450302	activated TAK1 mediates p38 MAPK activation	-0.266849	-0.205947	-0.137023	-0.317374	-0.282252	-0.25562
R-HSA-937042	IRAK2 mediated activation of TAK1 complex	-0.289441	-0.24461	-0.171183	-0.314624	-0.278541	-0.245482
R-HSA-212300	PRC2 methylates histones and DNA	-0.173159	-0.208207	-0.0328191	-0.30631	-0.25612	-0.153742
R-HSA-111457	Release of apoptotic factors from the mitochondria	-0.284056	-0.330767	-0.156553	-0.280604	-0.191002	-0.282204
R-HSA-9830674	Formation of the ureteric bud	-0.192076	0.236952250535632	-0.0938891	-0.167972	-0.160921	-0.150879
R-HSA-174362	Transport and metabolism of PAPS	-0.335738	-0.0985334	0.078850423667094	-0.277673	0.144703582150766	-0.365925
R-HSA-2408522	Selenoamino acid metabolism	-0.00560814	-0.350819	0.0720039774869677	-0.431351	-0.376482	-0.0206653
R-HSA-2408550	Metabolism of ingested H2SeO4 and H2SeO3 into H2Se	-0.3264	-0.0103625	-0.131269	-0.270393	0.0486274354406164	-0.331765
R-HSA-70688	Proline catabolism	-0.141732	-0.202899	-0.374853	-0.060543	-0.0959483	-0.153459
R-HSA-6806942	MET Receptor Activation	0.0518348410531975	0.15942190318156	0.308783262970582	0.197164033863634	0.08021937401309	0.0939264649149224
R-HSA-8852405	Signaling by MST1	0.164345293890815	0.216114505872472	0.281956728477421	0.230547416555452	0.202495704271463	0.154731902693784
R-HSA-189085	Digestion of dietary carbohydrate	0.0110621007961013	-0.0768271	-0.231214	0.0976648155096295	0.0536629377277628	-0.00482367
R-HSA-1638074	Keratan sulfate/keratin metabolism	-0.26294	0.0115998474821846	-0.0178209	-0.22074	-0.178294	-0.252054
R-HSA-2022854	Keratan sulfate biosynthesis	-0.197988	0.063089719235748	0.0570151824122112	-0.161273	-0.123817	-0.231929
R-HSA-913709	O-linked glycosylation of mucins	-0.0481695	-0.031907	-0.118675	-0.0191464	-0.0135272	-0.0591107
R-HSA-162791	Attachment of GPI anchor to uPAR	0.388152871961964	0.260507922644915	0.220710427834337	0.365205372800399	0.338683721449277	0.379769906603924
R-HSA-418889	Caspase activation via Dependence Receptors in the absence of ligand	-0.198504	-0.142134	-0.161733	-0.234011	-0.23538	-0.206251
R-HSA-428543	Inactivation of CDC42 and RAC1	-0.271771	-0.202443	0.0601965652531936	-0.2836	-0.266112	-0.192654
R-HSA-111931	PKA-mediated phosphorylation of CREB	-0.21112	-0.0707924	-0.0589705	-0.260916	-0.186718	-0.12564
R-HSA-111933	Calmodulin induced events	-0.239014	-0.119981	-0.116319	-0.291044	-0.251709	-0.152037
R-HSA-111996	Ca-dependent events	-0.256854	-0.154115	-0.150046	-0.298367	-0.26846	-0.143101
R-HSA-111997	CaM pathway	-0.239014	-0.119981	-0.116319	-0.291044	-0.251709	-0.152037
R-HSA-112043	PLC beta mediated events	-0.25211	-0.148494	-0.15029	-0.287977	-0.261576	-0.145425
R-HSA-1489509	DAG and IP3 signaling	-0.230055	-0.0881757	-0.101384	-0.26868	-0.237949	-0.155611
R-HSA-163359	Glucagon signaling in metabolic regulation	-0.273569	-0.0966256	-0.0493035	-0.295249	-0.204535	-0.177091
R-HSA-163615	PKA activation	-0.201968	-0.0575316	-0.045039	-0.25938	-0.180781	-0.113781
R-HSA-164378	PKA activation in glucagon signalling	-0.222467	-0.0345352	-0.0503786	-0.276236	-0.196151	-0.133904
R-HSA-170660	Adenylate cyclase activating pathway	0.00772615518126793	0.415407584977192	0.169789988857871	0.0650678044571391	0.347005842563547	0.000596783047963734
R-HSA-1855167	Synthesis of pyrophosphates in the cytosol	-0.224091	-0.0239849	-0.0765757	-0.17373	-0.0419574	-0.163476
R-HSA-210746	Regulation of gene expression in endocrine-committed (NEUROG3+) progenitor cells	-0.154892	-0.240819	-0.231221	-0.178705	-0.205081	-0.255372
R-HSA-9645460	Alpha-protein kinase 1 signaling pathway	-0.290652	-0.245009	-0.169109	-0.321469	-0.280766	-0.245954
R-HSA-190239	FGFR3 ligand binding and activation	-0.195939	0.285460302735763	-0.172748	-0.130472	-0.158964	-0.00411293
R-HSA-190322	FGFR4 ligand binding and activation	-0.270177	0.39340500722812	-0.113647	-0.203782	-0.237281	-0.0975716
R-HSA-190372	FGFR3c ligand binding and activation	-0.195939	0.285460302735763	-0.172748	-0.130472	-0.158964	-0.00411293
R-HSA-190375	FGFR2c ligand binding and activation	-0.256614	0.290143429735841	-0.214283	-0.192468	-0.220336	-0.0475073
R-HSA-5654227	Phospholipase C-mediated cascade; FGFR3	-0.213153	0.184930000442386	-0.067541	-0.15327	-0.183785	-0.138771
R-HSA-5654228	Phospholipase C-mediated cascade; FGFR4	-0.197348	0.241147917644367	-0.00210962	-0.137213	-0.167155	-0.12949
R-HSA-5654704	SHC-mediated cascade:FGFR3	-0.263026	-0.0538604	-0.288743	-0.206867	-0.225778	-0.239518
R-HSA-5654706	FRS-mediated FGFR3 signaling	-0.0131931	0.130966424661105	-0.0905648	-0.00356746	-0.0113235	0.0108979298986662
R-HSA-5654708	Downstream signaling of activated FGFR3	-0.0155674	0.0936747575299867	-0.0560051	-0.00168017	-0.0327973	0.000341349731564522
R-HSA-5654710	PI-3K cascade:FGFR3	-0.088921	0.0978466753803985	-0.0350367	-0.0692526	-0.1059	-0.0581214
R-HSA-5654712	FRS-mediated FGFR4 signaling	-0.0140563	0.150065757123399	-0.0688766	-0.00322516	-0.0114739	0.0094281927564332
R-HSA-5654716	Downstream signaling of activated FGFR4	-0.0151871	0.108924929294585	-0.0397125	-0.000791507	-0.0319756	9.06656652087112e-05
R-HSA-5654719	SHC-mediated cascade:FGFR4	-0.272911	-0.00151645	-0.240402	-0.218713	-0.245385	-0.228824
R-HSA-5654720	PI-3K cascade:FGFR4	-0.0857845	0.128674974263233	-0.00223834	-0.0663913	-0.101369	-0.0560942
R-HSA-5654732	Negative regulation of FGFR3 signaling	-0.233276	-0.177647	-0.196527	-0.256005	-0.215021	-0.182841
R-HSA-5654733	Negative regulation of FGFR4 signaling	-0.231526	-0.169542	-0.19087	-0.253748	-0.213161	-0.181473
R-HSA-5654741	Signaling by FGFR3	-0.17815	-0.132933	-0.169751	-0.187326	-0.168431	-0.140445
R-HSA-5654743	Signaling by FGFR4	-0.177941	-0.127098	-0.163948	-0.18687	-0.168117	-0.140343
R-HSA-5632681	Ligand-receptor interactions	-0.324858	0.101066191194152	-0.023337	-0.240369	-0.283222	-0.334559
R-HSA-9690406	Transcriptional regulation of testis differentiation	-0.396437	-0.128448	-0.173143	-0.4286	-0.436682	-0.449055
R-HSA-379716	Cytosolic tRNA aminoacylation	-0.196357	-0.203135	-0.0994384	-0.216722	-0.204142	-0.133672
R-HSA-379724	tRNA Aminoacylation	-0.132653	-0.155868	-0.101562	-0.179139	-0.15846	-0.12681
R-HSA-9013418	RHOBTB2 GTPase cycle	-0.331619	-0.178503	-0.144314	-0.345096	-0.308856	-0.294532
R-HSA-9013422	RHOBTB1 GTPase cycle	-0.340766	-0.216508	-0.0817015	-0.370193	-0.344216	-0.366352
R-HSA-9706574	RHOBTB GTPase Cycle	-0.294537	-0.168627	-0.111617	-0.306695	-0.281988	-0.274803
R-HSA-9827857	Specification of primordial germ cells	-0.144319	-0.0124612	0.026005515292317	-0.240438	-0.207988	-0.243676
R-HSA-1296072	Voltage gated Potassium channels	0.0970498724541847	0.166958185023212	0.367100098909157	0.0114615732069789	-0.055714	0.0867000110441677
R-HSA-381033	ATF6 (ATF6-alpha) activates chaperones	-0.153879	0.104047914763016	-0.0252612	-0.0875224	-0.145055	-0.129289
R-HSA-8874177	ATF6B (ATF6-beta) activates chaperones	-0.120452	0.212303499179594	0.04681035099245	-0.0204222	-0.0916088	-0.0705749
R-HSA-8874211	CREB3 factors activate genes	-0.195503	-0.172051	-0.125755	-0.137817	-0.098574	-0.103537
R-HSA-8963889	Assembly of active LPL and LIPC lipase complexes	-0.295532	-0.00912418	-0.148138	-0.245328	-0.23973	-0.226816
R-HSA-8963899	Plasma lipoprotein remodeling	-0.286533	0.00580819006997507	-0.0997654	-0.224525	-0.15024	-0.246342
R-HSA-9841251	Mitochondrial unfolded protein response (UPRmt)	-0.12496	-0.245117	0.0447743817272518	-0.351338	-0.301861	-0.115275
R-HSA-422085	Synthesis, secretion, and deacylation of Ghrelin	-0.113857	-0.148835	0.21519453129699	-0.228082	-0.253296	-0.118612
R-HSA-452723	Transcriptional regulation of pluripotent stem cells	-0.156063	-0.253049	-0.120038	-0.311842	-0.281268	-0.161428
R-HSA-380972	Energy dependent regulation of mTOR by LKB1-AMPK	-0.232028	-0.133334	-0.0741431	-0.220995	-0.212068	-0.254761
R-HSA-2534343	Interaction With Cumulus Cells And The Zona Pellucida	0.207910253223475	0.50502143243054	0.664822751851619	0.271520998076696	0.246978283087852	0.199950567461239
R-HSA-427601	Multifunctional anion exchangers	-0.0509583	0.281588916771231	0.469463244198445	0.00684311623537504	0.170782559288617	-0.204004
R-HSA-111446	Activation of BIM and translocation to mitochondria	-0.201902	-0.173375	-0.0325745	-0.261474	-0.156018	-0.153034
R-HSA-111453	BH3-only proteins associate with and inactivate anti-apoptotic BCL-2 members	-0.376594	-0.350673	-0.117411	-0.361357	-0.276869	-0.329562
R-HSA-8952158	RUNX3 regulates BCL2L11 (BIM) transcription	-0.291317	-0.0949088	-0.191673	-0.286115	-0.259153	-0.259293
R-HSA-9614657	FOXO-mediated transcription of cell death genes	-0.2996	-0.146793	-0.169625	-0.281572	-0.208396	-0.28176
R-HSA-9617629	Regulation of FOXO transcriptional activity by acetylation	-0.300663	-0.224171	-0.0895728	-0.301349	-0.262628	-0.255687
R-HSA-975578	Reactions specific to the complex N-glycan synthesis pathway	-0.235908	-0.164616	0.135845865629998	-0.161693	-0.191298	-0.246995
R-HSA-375281	Hormone ligand-binding receptors	0.0304210447825391	0.366810728966758	0.277135294252408	0.0854360481554868	0.0648200141182845	0.0236453878587571
R-HSA-9006115	Signaling by NTRK2 (TRKB)	-0.0856745	-0.0263811	-0.0348641	-0.0968202	-0.0978933	-0.0661169
R-HSA-9028731	Activated NTRK2 signals through FRS2 and FRS3	0.015111598450712	0.134100133324782	-0.0843252	0.0218153757141417	0.0151827054787921	0.0157965163703632
R-HSA-1475029	Reversible hydration of carbon dioxide	-0.00322228	-0.055811	-0.182556	0.0786523991145097	0.401890975759498	-0.0145884
R-HSA-1295596	Spry regulation of FGF signaling	-0.232345	-0.198157	-0.192808	-0.258021	-0.214636	-0.188576
R-HSA-74259	Purine catabolism	-0.318506	-0.192806	-0.0237888	-0.256438	-0.128939	-0.250687
R-HSA-8956319	Nucleotide catabolism	-0.266421	-0.0180364	0.0397194805160443	-0.204929	-0.0917289	-0.228814
R-HSA-5620971	Pyroptosis	-0.258149	-0.254617	-0.0943684	-0.283324	-0.28133	-0.228356
R-HSA-428540	Activation of RAC1	-0.0300814	-0.00558229	0.0908338589036437	-0.0504566	-0.0470644	-0.00647625
R-HSA-8985801	Regulation of cortical dendrite branching	0.146156238451144	0.0992088930435447	0.135314811909091	0.08388774749642	0.076867817896024	0.130446496760537
R-HSA-8963684	Tyrosine catabolism	0.32835132718246	0.276585940260719	0.170710400067802	0.367628177273767	0.34569595339401	0.320127248081456
R-HSA-8963691	Phenylalanine and tyrosine metabolism	-0.244074	-0.109077	0.136315233011024	-0.0872161	-0.040323	-0.252743
R-HSA-163680	AMPK inhibits chREBP transcriptional activation activity	-0.183769	-0.15511	-0.170683	-0.18611	-0.177005	-0.21571
R-HSA-2151209	Activation of PPARGC1A (PGC-1alpha) by phosphorylation	-0.203521	-0.159756	0.00249979854752175	-0.210451	-0.262349	-0.237947
R-HSA-9613354	Lipophagy	-0.235887	-0.0846131	-0.07725	-0.183986	-0.165525	-0.220313
R-HSA-164952	The role of Nef in HIV-1 replication and disease pathogenesis	-0.291014	-0.218079	-0.0822533	-0.299751	-0.240209	-0.214443
R-HSA-2465910	MASTL Facilitates Mitotic Progression	-0.166033	-0.107384	-0.251691	-0.15979	-0.140729	-0.13023
R-HSA-75067	Processing of Capped Intronless Pre-mRNA	-0.39139	-0.369198	-0.154333	-0.434476	-0.422771	-0.396955
R-HSA-77595	Processing of Intronless Pre-mRNAs	-0.432135	-0.328567	-0.139262	-0.499316	-0.452428	-0.434457
R-HSA-2160916	Hyaluronan degradation	-0.172563	-0.112686	-0.0264758	-0.197169	-0.201108	-0.1338
R-HSA-9033658	Blood group systems biosynthesis	-0.0774161	-0.0856476	-0.00750819	-0.0634417	-0.096887	-0.148051
R-HSA-9037629	Lewis blood group biosynthesis	0.0125618253872299	0.0549219068998161	0.118652406102902	-0.0300675	-0.0587956	-0.106919
R-HSA-5607763	CLEC7A (Dectin-1) induces NFAT activation	-0.268501	-0.0803426	-0.0971529	-0.224402	-0.245813	-0.196785
R-HSA-9755088	Ribavirin ADME	-0.188246	-0.00097945	0.137212881861348	-0.1322	0.0340916178942225	-0.10162
R-HSA-2214320	Anchoring fibril formation	-0.242141	0.306464614433485	0.103161064322328	-0.175683	-0.268599	-0.255154
R-HSA-2243919	Crosslinking of collagen fibrils	-0.324938	0.295555814699846	0.0767385258731721	-0.284312	-0.351716	-0.32811
R-HSA-111465	Apoptotic cleavage of cellular proteins	-0.144799	-0.0751864	-0.0491504	-0.163156	-0.132792	-0.130404
R-HSA-264870	Caspase-mediated cleavage of cytoskeletal proteins	-0.13715	-0.0698595	-0.0169463	-0.132629	-0.0998239	-0.097734
R-HSA-113507	E2F-enabled inhibition of pre-replication complex formation	-0.0187511	-0.050064	-0.15321	-0.0247203	-0.0596051	-0.0834259
R-HSA-113510	E2F mediated regulation of DNA replication	-0.156716	-0.170344	-0.194636	-0.156121	-0.144617	-0.15295
R-HSA-68616	Assembly of the ORC complex at the origin of replication	-0.174284	-0.28733	-0.0486973	-0.300413	-0.246419	-0.180119
R-HSA-68689	CDC6 association with the ORC:origin complex	0.226126235735001	0.208903128277067	0.0297658485261631	0.209458964634947	0.180339608789249	0.129363730330811
R-HSA-194313	VEGF ligand-receptor interactions	0.0647578735767416	0.233035835107055	0.0131063989312778	-0.186236	-0.211519	-0.250539
R-HSA-195399	VEGF binds to VEGFR leading to receptor dimerization	0.0647578735767416	0.233035835107055	0.0131063989312778	-0.186236	-0.211519	-0.250539
R-HSA-5624958	ARL13B-mediated ciliary trafficking of INPP5E	-0.00300191	-0.0737518	-0.0599036	0.0294836187424751	0.0937013290995893	0.0747885980140494
R-HSA-9648002	RAS processing	-0.241077	-0.254864	-0.166984	-0.284927	-0.224657	-0.195946
R-HSA-2468052	Establishment of Sister Chromatid Cohesion	-0.32274	-0.295827	-0.448816	-0.265134	-0.203405	-0.250774
R-HSA-2470946	Cohesin Loading onto Chromatin	-0.340288	-0.309563	-0.452972	-0.301368	-0.229449	-0.266946
R-HSA-68884	Mitotic Telophase/Cytokinesis	-0.260585	-0.206912	-0.287796	-0.229857	-0.205579	-0.233303
R-HSA-9031528	NR1H2 & NR1H3 regulate gene expression linked to triglyceride lipolysis in adipose	-0.262493	-0.0597801	-0.177831	-0.244362	-0.279012	-0.270619
R-HSA-190371	FGFR3b ligand binding and activation	-0.155856	0.411135663036134	-0.329137	-0.0915569	-0.12097	-0.166525
R-HSA-5205647	Mitophagy	-0.22401	-0.207289	-0.117991	-0.278609	-0.216519	-0.223806
R-HSA-5205685	PINK1-PRKN Mediated Mitophagy	-0.234594	-0.194795	-0.119783	-0.266598	-0.184114	-0.232192
R-HSA-5689877	Josephin domain DUBs	-0.229017	-0.163969	-0.113624	-0.275095	-0.218527	-0.200096
R-HSA-9930044	Nuclear RNA decay	-0.16802	-0.252533	-0.0278417	-0.320798	-0.321371	-0.182083
R-HSA-9013419	RHOT2 GTPase cycle	-0.160162	-0.0280781	0.172241059229359	-0.257699	-0.243227	-0.0602568
R-HSA-9013425	RHOT1 GTPase cycle	-0.214479	-0.0682087	0.130642201461785	-0.282154	-0.263958	-0.104314
R-HSA-9715370	Miro GTPase Cycle	-0.155192	-0.0267245	0.165131462811099	-0.252973	-0.238873	-0.0577803
R-HSA-9759475	Regulation of CDH11 Expression and Function	-0.165852	-0.148359	-0.0986256	-0.30127	-0.290677	-0.174876
R-HSA-9762293	Regulation of CDH11 gene transcription	-0.133933	-0.148089	-0.0985733	-0.293408	-0.296363	-0.134938
R-HSA-9764260	Regulation of Expression and Function of Type II Classical Cadherins	-0.170785	-0.151269	-0.0888888	-0.298196	-0.280868	-0.18022
R-HSA-5625886	Activated PKN1 stimulates transcription of AR (androgen receptor) regulated genes KLK2 and KLK3	-0.144002	-0.217787	-0.0218903	-0.276715	-0.231408	-0.1222
R-HSA-4641263	Regulation of FZD by ubiquitination	-0.262549	-0.179776	-0.0986006	-0.305889	-0.274078	-0.242611
R-HSA-399719	Trafficking of AMPA receptors	-0.0503747	-0.145476	-0.0474784	-0.120672	-0.116222	-0.0417301
R-HSA-399721	Glutamate binding, activation of AMPA receptors and synaptic plasticity	-0.0503747	-0.145476	-0.0474784	-0.120672	-0.116222	-0.0417301
R-HSA-5682910	LGI-ADAM interactions	-0.129211	-0.0372386	-0.123211	-0.0868832	-0.0890579	-0.0332664
R-HSA-210744	Regulation of gene expression in late stage (branching morphogenesis) pancreatic bud precursor cells	-0.307697	-0.205024	-0.168913	-0.342946	-0.343951	-0.316834
R-HSA-2046105	Linoleic acid (LA) metabolism	-0.191252	-0.0496557	0.0208461700487699	-0.127665	-0.156535	-0.201388
R-HSA-447038	NrCAM interactions	0.0634539728164061	0.0930565242162526	0.0457374793439108	0.0347844777540303	0.0538522845165865	0.0804210663675929
R-HSA-376172	DSCAM interactions	0.545336717446807	-0.0693644	0.392417070919353	0.0243575099977846	0.0175794457889694	0.538265854866187
R-HSA-964739	N-glycan trimming and elongation in the cis-Golgi	0.158773310189778	0.113995541791925	0.354825159832674	0.332383212529633	0.192018790262055	0.149966164270326
R-HSA-964827	Progressive trimming of alpha-1,2-linked mannose residues from Man9/8/7GlcNAc2 to produce Man5GlcNAc2	0.0252261521292024	-0.0390034	-0.210422	0.102323034584919	0.0681731536366419	0.0123476096574663
R-HSA-2892247	POU5F1 (OCT4), SOX2, NANOG activate genes related to proliferation	-0.283975	-0.215968	-0.221395	-0.264368	-0.260916	-0.263457
R-HSA-434313	Intracellular metabolism of fatty acids regulates insulin secretion	-0.232883	0.327647051947078	0.531866989650046	-0.174474	0.0466937690980657	-0.240222
R-HSA-8964011	HDL clearance	-0.219733	-0.110588	-0.0319014	-0.378922	-0.29955	-0.136689
R-HSA-9843743	Transcriptional regulation of brown and beige adipocyte differentiation	-0.255715	-0.169092	-0.133452	-0.299076	-0.275526	-0.255822
R-HSA-9844594	Transcriptional regulation of brown and beige adipocyte differentiation by EBF2	-0.255715	-0.169092	-0.133452	-0.299076	-0.275526	-0.255822
R-HSA-9854909	Regulation of MITF-M dependent genes involved in invasion	0.223608440089266	0.157415862661371	0.245477110108116	0.0104170354099704	0.167512478266713	-0.0347076
R-HSA-156588	Glucuronidation	-0.192533	-0.262268	-0.388529	-0.188731	-0.221495	-0.205099
R-HSA-5685938	HDR through Single Strand Annealing (SSA)	-0.141567	-0.13731	-0.0620447	-0.155964	-0.141711	-0.110634
R-HSA-110312	Translesion synthesis by REV1	-0.228678	-0.261487	-0.107271	-0.290092	-0.262505	-0.207623
R-HSA-5655862	Translesion synthesis by POLK	-0.231059	-0.263361	-0.110264	-0.291996	-0.264598	-0.210118
R-HSA-5656121	Translesion synthesis by POLI	-0.227764	-0.261344	-0.108787	-0.286739	-0.259446	-0.205127
R-HSA-110056	MAPK3 (ERK1) activation	-0.220506	-0.0694244	-0.202846	-0.251721	-0.249422	-0.226858
R-HSA-112409	RAF-independent MAPK1/3 activation	-0.258341	-0.0902205	-0.172193	-0.28433	-0.220761	-0.186096
R-HSA-112411	MAPK1 (ERK2) activation	-0.287927	-0.0999485	-0.157842	-0.32298	-0.252612	-0.190885
R-HSA-1170546	Prolactin receptor signaling	-0.133066	-0.117006	-0.163545	-0.127905	-0.0854624	-0.162565
R-HSA-6788467	IL-6-type cytokine receptor ligand interactions	-0.0918056	0.182614729819965	0.0199531763767689	-0.0718745	-0.108206	-0.0661858
R-HSA-8854691	Interleukin-20 family signaling	-0.201494	-0.0952594	-0.174102	-0.242239	-0.221414	-0.199581
R-HSA-8984722	Interleukin-35 Signalling	-0.232891	-0.13494	-0.140051	-0.245989	-0.234663	-0.227415
R-HSA-9020933	Interleukin-23 signaling	-0.123554	-0.0755058	0.0321936478216418	-0.136193	-0.112131	-0.153199
R-HSA-9020956	Interleukin-27 signaling	-0.24239	-0.151563	-0.139149	-0.256851	-0.245014	-0.236296
R-HSA-9027277	Erythropoietin activates Phospholipase C gamma (PLCG)	-0.229103	-0.15732	0.0726723913929068	-0.340562	-0.286799	-0.30571
R-HSA-9027283	Erythropoietin activates STAT5	-0.197639	-0.20076	0.0401946589100471	-0.325215	-0.263617	-0.273188
R-HSA-9027284	Erythropoietin activates RAS	-0.247219	-0.181225	-0.0915944	-0.298339	-0.273203	-0.297623
R-HSA-9732724	IFNG signaling activates MAPKs	-0.410373	-0.259257	-0.307322	-0.419264	-0.402716	-0.334331
R-HSA-9818026	NFE2L2 regulating inflammation associated genes	-0.325672	-0.101998	-0.181523	-0.301617	-0.293107	-0.243144
R-HSA-9818030	NFE2L2 regulating tumorigenic genes	-0.362283	-0.187375	-0.259385	-0.339047	-0.292321	-0.296801
R-HSA-9818035	NFE2L2 regulating ER-stress associated genes	-0.312406	-0.016726	-0.149819	-0.260006	-0.282841	-0.247269
R-HSA-9818749	Regulation of NFE2L2 gene expression	-0.390224	-0.303842	-0.249873	-0.407182	-0.408037	-0.384209
R-HSA-8876725	Protein methylation	-0.105689	-0.190129	0.0244538600872256	-0.284287	-0.209829	-0.0965088
R-HSA-173599	Formation of the active cofactor, UDP-glucuronate	0.053317370777644	-0.0184843	-0.152483	0.123980411971125	0.0897156245123419	0.0407326706937666
R-HSA-1296025	ATP sensitive Potassium channels	0.478665496049166	0.439157155399473	0.377260755048288	0.505618964003512	0.489025460930641	0.47225636523266
R-HSA-9762292	Regulation of CDH11 function	-0.202214	-0.0291527	-0.121988	-0.199303	-0.165026	-0.203922
R-HSA-9764302	Regulation of CDH19 Expression and Function	-0.17809	-0.125363	-0.0369981	-0.18479	-0.122595	-0.173673
R-HSA-9833576	CDH11 homotypic and heterotypic interactions	-0.180899	-0.100534	-0.0788514	-0.19142	-0.146064	-0.176807
R-HSA-2485179	Activation of the phototransduction cascade	0.0432132645778421	0.228591054062767	0.407954543542098	0.0333432929808688	0.00921837882552634	-0.0384552
R-HSA-425561	Sodium/Calcium exchangers	-0.187725	0.10471613435717	-0.0343135	-0.135501	-0.143417	-0.197264
R-HSA-1482798	Acyl chain remodeling of CL	0.148184347959898	-0.00121269	0.13851172391734	0.121063376985173	0.180243336664605	0.219236544481494
R-HSA-1296061	HCN channels	-0.222778	0.0884246192833713	-0.0368638	-0.254432	-0.276564	-0.23246
R-HSA-162699	Synthesis of dolichyl-phosphate mannose	-0.172855	-0.22162	-0.339424	-0.108016	-0.137409	-0.182287
R-HSA-162658	Golgi Cisternae Pericentriolar Stack Reorganization	-0.127892	-0.0648239	-0.153441	-0.081356	-0.0717923	-0.112583
R-HSA-196819	Vitamin B1 (thiamin) metabolism	0.283662516833285	0.243862654631551	0.405882547399171	0.344703600129375	0.318821400571098	0.274202237495429
R-HSA-171306	Packaging Of Telomere Ends	-0.189695	-0.303921	0.071192253871739	-0.364639	-0.296807	-0.163658
R-HSA-2299718	Condensation of Prophase Chromosomes	-0.164337	-0.272885	-0.0485249	-0.307653	-0.244165	-0.1462
R-HSA-2559586	DNA Damage/Telomere Stress Induced Senescence	-0.226023	-0.232044	-0.0687126	-0.279155	-0.262928	-0.204064
R-HSA-427389	ERCC6 (CSB) and EHMT2 (G9a) positively regulate rRNA expression	-0.193885	-0.260342	-0.0888568	-0.3187	-0.295635	-0.173041
R-HSA-5334118	DNA methylation	-0.14499	-0.295092	-0.00220874	-0.367707	-0.267573	-0.120813
R-HSA-5693571	Nonhomologous End-Joining (NHEJ)	-0.149836	-0.218245	-0.0511413	-0.274865	-0.248346	-0.149037
R-HSA-73728	RNA Polymerase I Promoter Opening	-0.1321	-0.283906	0.00953489150504114	-0.321819	-0.256761	-0.0997929
R-HSA-9616222	Transcriptional regulation of granulopoiesis	-0.236375	-0.261555	-0.120112	-0.308627	-0.268067	-0.228287
R-HSA-9821993	Replacement of protamines by nucleosomes in the male pronucleus	-0.135176	-0.300172	0.0471317681920999	-0.38078	-0.313311	-0.136138
R-HSA-9843970	Regulation of endogenous retroelements by the Human Silencing Hub (HUSH) complex	-0.183197	-0.263639	-0.0186343	-0.339566	-0.270657	-0.148275
R-HSA-9634600	Regulation of glycolysis by fructose 2,6-bisphosphate metabolism	-0.207535	-0.17235	-0.179019	-0.24315	-0.190036	-0.161344
R-HSA-419812	Calcitonin-like ligand receptors	0.10980981240838	0.323446934207764	0.214004718452884	0.168907950885206	0.1445931570885	0.101159354677987
R-HSA-193681	Ceramide signalling	-0.0549971	0.195515943551123	0.137107459487482	0.0150272603510488	0.105119575140869	-0.0644451
R-HSA-5626978	TNFR1-mediated ceramide production	0.477020370354889	-0.475446	0.522038035080699	-0.509496	-0.486108	0.457350953199786
R-HSA-9840310	Glycosphingolipid catabolism	-0.295867	0.00947375174738743	0.0564929725466376	-0.26477	-0.248702	-0.292786
R-HSA-1236977	Endosomal/Vacuolar pathway	-0.473857	-0.178224	-0.182821	-0.433917	-0.273779	-0.240327
R-HSA-1592389	Activation of Matrix Metalloproteinases	-0.137943	0.265248782402646	-0.0128674	-0.0788718	-0.0514714	-0.116421
R-HSA-5223345	Miscellaneous transport and binding events	-0.253682	-0.0896544	-0.0514951	-0.220256	-0.204365	-0.247593
R-HSA-5685939	HDR through MMEJ (alt-NHEJ)	-0.133962	-0.0877368	-0.07741	-0.135482	-0.0963345	-0.128277
R-HSA-5693548	Sensing of DNA Double Strand Breaks	-0.190055	-0.128436	-0.119904	-0.192407	-0.221568	-0.145154
R-HSA-2022857	Keratan sulfate degradation	-0.471578	-0.0305607	-0.0784666	-0.431947	-0.449514	-0.445877
R-HSA-5576892	Phase 0 - rapid depolarisation	-0.10098	0.104244213321895	0.0864889399192438	-0.0812323	-0.0743721	-0.0441195
R-HSA-1369007	Mitochondrial ABC transporters	0.661408982538297	0.586481865406776	0.444776498705032	0.712488022807691	0.68257613269601	0.65092739141747
R-HSA-2564830	Cytosolic iron-sulfur cluster assembly	-0.0412983	0.158988739650264	0.254175237741133	-0.0300746	-0.0518854	0.0687464438661811
R-HSA-9824594	Regulation of MITF-M-dependent genes involved in apoptosis	-0.224666	-0.294999	-0.12882	-0.327684	-0.30674	-0.249205
R-HSA-9825892	Regulation of MITF-M-dependent genes involved in cell cycle and proliferation	-0.241215	-0.210475	-0.137938	-0.231736	-0.225397	-0.242519
R-HSA-9854907	Regulation of MITF-M dependent genes involved in metabolism	-0.0554242	-0.131576	0.0128529215150543	-0.0433908	0.0254726710627963	-0.0160684
R-HSA-3232118	SUMOylation of transcription factors	-0.179828	-0.2027	-0.108192	-0.254202	-0.268761	-0.167484
R-HSA-428542	Regulation of commissural axon pathfinding by SLIT and ROBO	0.0351042246126996	0.0338724366063841	0.0106473856802563	-0.0723342	-0.0457919	0.059414734560598
R-HSA-9013407	RHOH GTPase cycle	-0.247574	-0.124896	-0.0397047	-0.24783	-0.21042	-0.215229
R-HSA-428890	Role of ABL in ROBO-SLIT signaling	-0.167853	-0.141638	0.0404083139158644	-0.20736	-0.0661934	-0.00870884
R-HSA-388844	Receptor-type tyrosine-protein phosphatases	-0.141142	0.190571329222913	0.00792292865814059	-0.146728	-0.174953	-0.10753
R-HSA-9933947	Formation of the non-canonical BAF (ncBAF) complex	-0.250279	-0.117088	-0.0601613	-0.196616	-0.183241	-0.153119
R-HSA-5661270	Formation of xylulose-5-phosphate	0.0669398434330483	0.0264041073812308	0.146301799243627	0.124446004549882	0.345640670563787	0.0592014675368301
R-HSA-2142789	Ubiquinol biosynthesis	0.0869411253624009	-0.119884	0.164216523154317	0.0144482818463467	-0.0177361	0.0403166858557363
R-HSA-8978934	Metabolism of cofactors	-0.192179	-0.16348	-0.0673896	-0.265798	-0.217394	-0.146792
R-HSA-2142712	Synthesis of 12-eicosatetraenoic acid derivatives	0.186127160527528	0.358119747615229	0.55319694616185	-0.050413	-0.0782855	0.146293537985928
R-HSA-8850843	Phosphate bond hydrolysis by NTPDase proteins	-0.142723	0.110281703885961	-0.0129649	-0.0839023	0.177101333784505	-0.151072
R-HSA-9623433	NR1H2 & NR1H3 regulate gene expression to control bile acid homeostasis	-0.243047	-0.297904	-0.202486	-0.312011	-0.339087	-0.299672
R-HSA-8854214	TBC/RABGAPs	-0.253937	-0.181744	-0.184959	-0.237618	-0.211646	-0.213699
R-HSA-8934903	Receptor Mediated Mitophagy	-0.218539	-0.226204	-0.166366	-0.301801	-0.277797	-0.234384
R-HSA-352230	Amino acid transport across the plasma membrane	-0.144183	0.036345768722321	-0.0459915	-0.113305	0.00451288195359661	-0.13149
R-HSA-176974	Unwinding of DNA	-0.0387106	-0.129114	-0.0383403	-0.0508795	-0.0235485	-0.0855941
R-HSA-69190	DNA strand elongation	-0.0669141	-0.129461	0.0265195959562142	-0.0822511	-0.069293	-0.0380268
R-HSA-69205	G1/S-Specific Transcription	-0.248226	-0.214792	-0.173791	-0.267414	-0.271097	-0.242764
R-HSA-8949613	Cristae formation	-0.0510578	-0.135029	0.117822871275403	-0.091838	-0.0291797	-0.0999335
R-HSA-8949215	Mitochondrial calcium ion transport	-0.287463	-0.158754	0.0180661372833443	-0.322264	-0.257661	-0.331888
R-HSA-8949664	Processing of SMDT1	-0.152074	-0.0282972	0.0161776102471418	-0.176772	-0.12242	-0.158626
R-HSA-3371511	HSF1 activation	-0.108157	-0.101597	-0.120507	-0.117421	-0.0807087	-0.100171
R-HSA-3371568	Attenuation phase	-0.190713	-0.0613901	-0.069415	-0.140579	-0.101084	-0.153107
R-HSA-3371571	HSF1-dependent transactivation	-0.201736	-0.0679245	-0.068705	-0.150443	-0.113817	-0.164688
R-HSA-8849468	PTK6 Regulates Proteins Involved in RNA Processing	-0.264499	-0.21873	-0.0859536	-0.258261	-0.256212	-0.269118
R-HSA-2995383	Initiation of Nuclear Envelope (NE) Reformation	-0.216224	-0.134202	-0.175619	-0.231206	-0.195839	-0.207304
R-HSA-8866376	Reelin signalling pathway	-0.289848	-0.13498	-0.0137414	-0.262488	-0.225061	-0.17496
R-HSA-426486	Small interfering RNA (siRNA) biogenesis	-0.0302006	-0.261426	0.0676207306205156	-0.348873	-0.271894	-0.0728287
R-HSA-75892	Platelet Adhesion to exposed collagen	-0.354332	0.00645955563175638	0.0367974997620434	-0.3643	-0.294842	-0.301869
R-HSA-198753	ERK/MAPK targets	-0.259516	-0.215687	-0.264491	-0.290661	-0.261194	-0.21334
R-HSA-199920	CREB phosphorylation	-0.416112	-0.133508	-0.171311	-0.449963	-0.394118	-0.319628
R-HSA-450282	MAPK targets/ Nuclear events mediated by MAP kinases	-0.297371	-0.215422	-0.218943	-0.296275	-0.286066	-0.25929
R-HSA-5621575	CD209 (DC-SIGN) signaling	-0.331908	-0.265855	-0.145836	-0.341218	-0.330115	-0.288327
R-HSA-1502540	Signaling by Activin	-0.148122	0.00794060607707303	-0.0857842	-0.137883	-0.1578	-0.107006
R-HSA-5357786	TNFR1-induced proapoptotic signaling	-0.0789286	-0.0465141	-0.0215512	-0.0453633	-0.0166513	-0.0655837
R-HSA-6804754	Regulation of TP53 Expression	-0.249379	-0.252966	-0.141042	-0.275148	-0.308846	-0.253491
R-HSA-9615933	Postmitotic nuclear pore complex (NPC) reformation	-0.254425	-0.156485	-0.176183	-0.264664	-0.229153	-0.244684
R-HSA-8963693	Aspartate and asparagine metabolism	0.120343626202632	0.0518425716609534	-0.0851815	0.185997921508444	0.26085801063682	0.108444365407833
R-HSA-9856872	Malate-aspartate shuttle	-0.0344353	0.213415974589166	-0.0539699	-0.127829	-0.158965	-0.063959
R-HSA-3295583	TRP channels	-0.125865	-0.117879	0.0142614778572755	-0.192697	-0.217868	-0.192596
R-HSA-2022377	Metabolism of Angiotensinogen to Angiotensins	-0.197134	0.127476828848859	0.0962921674896109	-0.208558	-0.234715	-0.112093
R-HSA-9757110	Prednisone ADME	0.27940677612868	0.38223494297696	0.391241789567255	0.260221930392203	0.439369584079637	0.359922103314462
R-HSA-9648895	Response of EIF2AK1 (HRI) to heme deficiency	-0.193009	-0.0437249	-0.114844	-0.130264	-0.162165	-0.146811
R-HSA-191273	Cholesterol biosynthesis	-0.055106	-0.0844971	0.00435362840089329	-0.0546889	0.0173383753927372	-0.0641714
R-HSA-6807047	Cholesterol biosynthesis via desmosterol	-0.197388	-0.191505	-0.118356	-0.164031	-0.0307186	-0.134084
R-HSA-6807062	Cholesterol biosynthesis via lathosterol	-0.173646	-0.176207	-0.100222	-0.135586	-0.0194378	-0.11764
R-HSA-389542	NADPH regeneration	-0.539049	0.285859130982456	-0.0957265	-0.579225	-0.585786	-0.604937
R-HSA-9818025	NFE2L2 regulating TCA cycle genes	-0.355202	-0.0925728	-0.187102	-0.356676	-0.37849	-0.331067
R-HSA-193807	Synthesis of bile acids and bile salts via 27-hydroxycholesterol	-0.00273716	-0.0384409	0.0182832375909853	-0.0238169	-0.0609659	0.0370831298497557
R-HSA-196757	Metabolism of folate and pterines	0.158625827606399	0.0713381877003613	0.0233858142298663	0.221735450175406	0.197586083118945	0.143649165586515
R-HSA-1482883	Acyl chain remodeling of DAG and TAG	-0.274372	-0.26127	-0.2053	-0.214729	-0.0910572	-0.281316
R-HSA-75109	Triglyceride biosynthesis	-0.221598	-0.19142	0.238364880459849	-0.162397	-0.275105	-0.270158
R-HSA-2187335	The retinoid cycle in cones (daylight vision)	0.203605154781386	0.345332917613569	0.0485104043357811	0.245139677137622	0.219795415959439	0.195872041474809
R-HSA-114508	Effects of PIP2 hydrolysis	-0.189378	-0.193697	-0.129412	-0.265811	-0.239043	-0.141934
R-HSA-389359	CD28 dependent Vav1 pathway	-0.28158	-0.179854	-0.0304957	-0.294039	-0.262476	-0.174397
R-HSA-5696395	Formation of Incision Complex in GG-NER	-0.258804	-0.259195	-0.147514	-0.307238	-0.265662	-0.249903
R-HSA-5696399	Global Genome Nucleotide Excision Repair (GG-NER)	-0.255442	-0.208885	-0.128586	-0.276751	-0.256118	-0.21847
R-HSA-71262	Carnitine synthesis	-0.0648753	-0.109034	-0.248725	0.0021677071677898	-0.0237363	-0.074161
R-HSA-163210	Formation of ATP by chemiosmotic coupling	-0.16573	-0.24853	0.39000803380361	-0.216996	-0.21958	-0.172379
R-HSA-1799339	SRP-dependent cotranslational protein targeting to membrane	-0.02058	-0.383191	0.132906590228656	-0.470445	-0.419209	-0.0618985
R-HSA-6804758	Regulation of TP53 Activity through Acetylation	-0.224868	-0.197773	-0.0965067	-0.245279	-0.264166	-0.227063
R-HSA-162710	Synthesis of glycosylphosphatidylinositol (GPI)	0.0910755902672493	0.203813322179297	-0.109756	0.157068526596842	0.126864435585405	0.080582765939958
R-HSA-9925561	Developmental Lineage of Pancreatic Acinar Cells	-0.0598567	-0.233067	0.378618621942266	-0.314969	-0.329186	-0.13141
R-HSA-110314	Recognition of DNA damage by PCNA-containing replication complex	-0.242743	-0.228164	-0.126577	-0.301818	-0.260338	-0.183751
R-HSA-446210	Synthesis of UDP-N-acetyl-glucosamine	-0.140227	0.229823548388051	0.126553416137792	-0.0676289	-0.0961257	-0.148068
R-HSA-8985586	SLIT2:ROBO1 increases RHOA activity	-0.104803	-0.16352	-0.0551678	-0.258414	-0.226018	-0.320391
R-HSA-8964539	Glutamate and glutamine metabolism	-0.373049	-0.179972	0.160584760578142	-0.318563	-0.224288	-0.340937
R-HSA-189445	Metabolism of porphyrins	-0.205985	-0.111206	-0.00239879	-0.202905	0.0064700686527957	-0.165255
R-HSA-189483	Heme degradation	-0.233394	-0.0946291	-0.0277925	-0.245107	0.0136771253026315	-0.221867
R-HSA-9754706	Atorvastatin ADME	-0.14027	0.0823230918983677	0.164332634878216	0.0431133096664884	0.0138590115630162	-0.149849
R-HSA-879518	Transport of organic anions	-0.00455425	0.203089896971417	0.330892867940801	0.102522801317023	0.0814566939013794	-0.0120779
R-HSA-416993	Trafficking of GluR2-containing AMPA receptors	-0.0363159	-0.0925068	-0.0374134	-0.0564365	-0.0393508	-0.0385961
R-HSA-177504	Retrograde neurotrophin signalling	-0.199681	-0.159637	-0.0429898	-0.241052	-0.237238	-0.238378
R-HSA-5140745	WNT5A-dependent internalization of FZD2, FZD5 and ROR2	-0.140916	-0.12299	0.0121867325190607	-0.226615	-0.209442	-0.146836
R-HSA-8866427	VLDLR internalisation and degradation	-0.236333	-0.199031	-0.132632	-0.285547	-0.252111	-0.222247
R-HSA-73621	Pyrimidine catabolism	-0.176544	0.380834958551224	0.0721040815310299	-0.114714	0.0615566457341694	-0.185833
R-HSA-2408552	Methylation of MeSeH for excretion	0.431480993767009	0.391976121499429	0.330172943551927	0.458783249934159	0.442191203581775	0.425160214204196
R-HSA-156711	Polo-like kinase mediated events	-0.22914	-0.1218	-0.108945	-0.223986	-0.234006	-0.239724
R-HSA-2514853	Condensation of Prometaphase Chromosomes	-0.157553	-0.157712	-0.0881373	-0.288774	-0.292905	-0.189414
R-HSA-2980767	Activation of NIMA Kinases NEK9, NEK6, NEK7	-0.265632	-0.140694	-0.213042	-0.255072	-0.224719	-0.218983
R-HSA-69478	G2/M DNA replication checkpoint	-0.288877	-0.160622	-0.192913	-0.281205	-0.302564	-0.260515
R-HSA-1299503	TWIK related potassium channel (TREK)	0.495259831460674	0.455933988764045	0.394311797752809	0.522296348314607	0.505969101123596	0.489290730337079
R-HSA-210745	Regulation of gene expression in beta cells	-0.125508	-0.173088	-0.0412206	-0.243666	-0.225999	-0.13693
R-HSA-419408	Lysosphingolipid and LPA receptors	-0.0186357	0.109793591598027	0.0873489781008716	-0.02383	0.0955949304709897	0.0296303059771122
R-HSA-196108	Pregnenolone biosynthesis	-0.229279	-0.168873	-0.27668	0.0338930833542123	-0.190411	-0.226846
R-HSA-9856532	Mechanical load activates signaling by PIEZO1 and integrins in osteocytes	-0.18959	0.0339135275234689	-0.0241446	-0.238559	-0.210583	-0.162446
R-HSA-418886	Netrin mediated repulsion signals	-0.0926165	0.0006561048332894	-0.0638501	-0.202236	-0.154501	-0.086921
R-HSA-1483248	Synthesis of PIPs at the ER membrane	-0.0205475	-0.0854148	0.0101525217210943	-0.101066	-0.128654	-0.101077
R-HSA-9012546	Interleukin-18 signaling	-0.168744	0.031879850977667	-0.111174	-0.103632	-0.132827	-0.0902055
R-HSA-166187	Mitochondrial Uncoupling	0.563358449312997	0.0617240434566166	0.481068514527567	0.0384725005423948	0.268762926192597	0.127045978726893
R-HSA-167826	The fatty acid cycling model	0.721109940288022	0.229539694085222	0.728047067088163	0.330768267304146	0.730769230769231	0.258596432120997
R-HSA-1169092	Activation of RAS in B cells	-0.255625	-0.240333	-0.314855	-0.189602	-0.216098	-0.265616
R-HSA-392517	Rap1 signalling	-0.181018	-0.0930047	-0.119169	-0.206158	-0.17241	-0.169536
R-HSA-71336	Pentose phosphate pathway	-0.129655	-0.0769357	0.208081725511334	-0.100735	-0.0611557	-0.0731156
R-HSA-379726	Mitochondrial tRNA aminoacylation	-0.0825301	-0.146162	-0.10168	-0.137757	-0.12015	-0.0986607
R-HSA-1566948	Elastic fibre formation	-0.0836168	0.337144298378874	0.0412274543553796	-0.0366103	-0.0540112	-0.0792346
R-HSA-2129379	Molecules associated with elastic fibres	-0.0493549	0.347409729228479	0.0360570999240465	0.000278397621315762	-0.0195657	-0.0517106
R-HSA-947581	Molybdenum cofactor biosynthesis	0.0577033142038276	0.00345058096437051	0.142633532905302	0.132330711852278	0.211997618117224	0.0457784092516051
R-HSA-427589	Type II Na+/Pi cotransporters	0.181265606609268	0.122363268348821	-0.00544068	0.255823101817066	0.222508072335806	0.170013627279244
R-HSA-427652	Sodium-coupled phosphate cotransporters	-0.154817	0.069857515568702	0.0179058429910827	-0.0964151	-0.123234	-0.164143
R-HSA-5683826	Surfactant metabolism	0.0240117561707682	-0.0260472	0.0663175795819159	-0.144108	-0.147992	-0.0395697
R-HSA-380994	ATF4 activates genes in response to endoplasmic reticulum stress	-0.0725633	-0.0315161	-0.058887	-0.0934675	-0.102293	-0.0830747
R-HSA-381042	PERK regulates gene expression	-0.145396	0.00177100170108954	-0.00819162	-0.12987	-0.155948	-0.13699
R-HSA-450604	KSRP (KHSRP) binds and destabilizes mRNA	-0.103122	-0.109146	-0.0610117	-0.158865	-0.136656	-0.103167
R-HSA-4419969	Depolymerization of the Nuclear Lamina	-0.217617	-0.147133	-0.0848881	-0.262389	-0.25208	-0.192948
R-HSA-8963896	HDL assembly	-0.322172	-0.152584	-0.0231785	-0.354424	-0.292485	-0.237463
R-HSA-8963898	Plasma lipoprotein assembly	-0.303686	-0.0738106	-0.0375359	-0.269641	-0.208983	-0.264288
R-HSA-196807	Nicotinate metabolism	-0.0606648	0.0192478003497993	-0.0731644	0.013558879267861	-0.121519	-0.109391
R-HSA-1614517	Sulfide oxidation to sulfate	0.00621510018530821	0.360337150915642	0.137407899650621	0.070775618809556	0.0423993969348537	-0.00375972
R-HSA-1614558	Degradation of cysteine and homocysteine	1.91090556889428e-05	0.131350557926019	-0.0574473	0.0864274784509883	0.0319240069755506	0.00942674652748415
R-HSA-1614635	Sulfur amino acid metabolism	-0.0891678	-0.0102002	-0.0764929	-0.0599151	-0.0745873	-0.061704
R-HSA-8866907	Activation of the TFAP2 (AP-2) family of transcription factors	-0.313504	-0.0879611	0.0413389002767152	-0.285646	-0.294863	-0.272668
R-HSA-418890	Role of second messengers in netrin-1 signaling	-0.0854116	-0.0688438	-0.0493652	-0.165134	-0.193158	-0.0950533
R-HSA-2473224	Antagonism of Activin by Follistatin	0.169544039951653	0.110431734478917	0.227221298010396	0.304150511615212	0.187284670699649	0.15974055916796
R-HSA-2025928	Calcineurin activates NFAT	-0.177378	-0.180269	-0.00223487	-0.239098	-0.110951	-0.115598
R-HSA-1307965	betaKlotho-mediated ligand binding	-0.212113	0.640876676536155	0.152556871374341	-0.1418	-0.177259	-0.22438
R-HSA-9014843	Interleukin-33 signaling	0.49644071675785	0.454872296719946	0.753148992078443	0.540219931877334	0.262418749227986	0.245071147851164
R-HSA-918233	TRAF3-dependent IRF activation pathway	-0.275945	-0.177253	-0.1756	-0.259776	-0.192718	-0.242549
R-HSA-933541	TRAF6 mediated IRF7 activation	-0.165438	-0.098544	-0.155031	-0.127869	-0.0895384	-0.150753
R-HSA-399997	Acetylcholine regulates insulin secretion	-0.0927028	-0.117395	0.00833144250771245	-0.223694	-0.175247	0.0135864513872469
R-HSA-480985	Synthesis of dolichyl-phosphate-glucose	0.0969512498448857	0.0492030171337235	-0.0912494	0.168518829782089	0.426848446883521	0.0861909678893084
R-HSA-6793080	rRNA modification in the mitochondrion	-0.21276	-0.162004	-0.0386044	-0.190829	-0.155641	-0.217751
R-HSA-9937008	Mitochondrial mRNA modification	-0.292284	-0.14311	0.0865006174061705	-0.308945	-0.32521	-0.360453
R-HSA-8941332	RUNX2 regulates genes involved in cell migration	-0.201838	-0.124817	-0.0760714	-0.318882	-0.254442	-0.195109
R-HSA-9008059	Interleukin-37 signaling	-0.250288	-0.149498	-0.158942	-0.285974	-0.219972	-0.256218
R-HSA-5696394	DNA Damage Recognition in GG-NER	-0.259237	-0.187769	-0.106781	-0.288444	-0.269521	-0.220933
R-HSA-9933939	Formation of the polybromo-BAF (pBAF) complex	-0.190615	-0.0628464	-0.0536144	-0.148863	-0.153988	-0.111537
R-HSA-1538133	G0 and Early G1	-0.302739	-0.29299	-0.171075	-0.33342	-0.335146	-0.301602
R-HSA-69200	Phosphorylation of proteins involved in G1/S transition by active Cyclin E:Cdk2 complexes	-0.307711	-0.311419	-0.194636	-0.258106	-0.2583	-0.314492
R-HSA-196836	Vitamin C (ascorbate) metabolism	-0.321833	-0.0533163	0.028658550729493	-0.156301	-0.0810221	-0.331061
R-HSA-71384	Ethanol oxidation	0.272223526908041	0.429387493556528	0.194457260386625	0.339528926347103	0.312980601792071	0.262363643531509
R-HSA-5652084	Fructose metabolism	0.262499408536661	0.139065938736753	0.155185426496638	0.252658163304337	0.258276711745053	0.252762643067039
R-HSA-70350	Fructose catabolism	0.295004863060837	0.165459759331033	0.196291851732328	0.272697874220222	0.288452324977795	0.285315502121735
R-HSA-9927432	Developmental Lineage of Mammary Gland Myoepithelial Cells	-0.288323	-0.055157	-0.0325477	-0.295908	-0.267431	-0.253919
R-HSA-1474151	Tetrahydrobiopterin (BH4) synthesis, recycling, salvage and regulation	-0.200343	-0.172989	-0.0828518	-0.271335	-0.208577	-0.135215
R-HSA-8964208	Phenylalanine metabolism	-0.385804	-0.198735	0.132478885541113	-0.189134	-0.125831	-0.394603
R-HSA-140837	Intrinsic Pathway of Fibrin Clot Formation	-0.152367	-0.030464	-0.0580716	-0.1819	-0.162036	-0.134014
R-HSA-140875	Common Pathway of Fibrin Clot Formation	-0.134238	-0.0788839	-0.0951579	-0.129972	-0.0199792	-0.142599
R-HSA-140877	Formation of Fibrin Clot (Clotting Cascade)	-0.155776	-0.0485343	-0.0874715	-0.169078	-0.103917	-0.144934
R-HSA-70635	Urea cycle	0.415208503230874	0.382933951166327	0.260239094056026	0.341049524147253	0.448728893298974	0.40878458045521
R-HSA-74217	Purine salvage	-0.304852	-0.301392	0.0514360315347582	-0.473884	-0.229066	-0.210579
R-HSA-389661	Glyoxylate metabolism and glycine degradation	-0.0773772	-0.0552699	0.0314076839903215	-0.0377076	-0.0582135	-0.0455784
R-HSA-1251932	PLCG1 events in ERBB2 signaling	-0.373111	-0.101392	-0.0536185	-0.386596	-0.342801	-0.327213
R-HSA-2179392	EGFR Transactivation by Gastrin	-0.326266	-0.128907	-0.0545356	-0.371449	-0.345255	-0.279263
R-HSA-881907	Gastrin-CREB signalling pathway via PKC and MAPK	-0.316104	-0.142874	-0.101909	-0.351647	-0.332503	-0.246769
R-HSA-8857538	PTK6 promotes HIF1A stabilization	-0.240066	-0.259276	0.0173214626452927	-0.444353	-0.405697	-0.246227
R-HSA-8866910	TFAP2 (AP-2) family regulates transcription of growth factors and their receptors	-0.231787	-0.204335	0.0445585363026262	-0.43526	-0.399963	-0.194582
R-HSA-5653890	Lactose synthesis	-0.569135	-0.281802	-0.100959	-0.175347	-0.221558	-0.576236
R-HSA-159740	Gamma-carboxylation of protein precursors	-0.222738	-0.0426296	-0.166477	-0.199095	-0.134033	-0.232883
R-HSA-159763	Transport of gamma-carboxylated protein precursors from the endoplasmic reticulum to the Golgi apparatus	-0.226601	-0.0442543	-0.169366	-0.201347	-0.136194	-0.236902
R-HSA-159782	Removal of aminoterminal propeptides from gamma-carboxylated proteins	-0.209034	0.0389411632519643	-0.0839596	-0.189247	-0.13013	-0.217777
R-HSA-159854	Gamma-carboxylation, transport, and amino-terminal cleavage of proteins	-0.207282	0.0394881869782388	-0.0825007	-0.187808	-0.129236	-0.215513
R-HSA-140834	Extrinsic Pathway of Fibrin Clot Formation	-0.251035	0.110335278250722	-0.21656	-0.178297	-0.209884	-0.263047
R-HSA-173736	Alternative complement activation	-0.0659102	0.445097743629869	0.10865506572264	-0.00138991	-0.0295326	0.020797930441192
R-HSA-75205	Dissolution of Fibrin Clot	0.0774890182058501	0.22957232064975	0.0360636325970801	0.107063005550725	0.0757324064457323	0.106367111991106
R-HSA-174577	Activation of C3 and C5	0.00887825732021394	0.164702872342707	-0.0542758	-0.0301134	0.0475750336477745	-0.00796677
R-HSA-1237044	Erythrocytes take up carbon dioxide and release oxygen	-0.218871	-0.0895889	-0.244993	-0.158341	0.312707108062283	-0.170285
R-HSA-1247673	Erythrocytes take up oxygen and release carbon dioxide	-0.269805	-0.11422	-0.280739	-0.208425	0.326516880464973	-0.212811
R-HSA-1480926	O2/CO2 exchange in erythrocytes	-0.218871	-0.0895889	-0.244993	-0.158341	0.312707108062283	-0.170285
R-HSA-166665	Terminal pathway of complement	-0.433236	0.551923669501391	0.266108184477586	-0.219258	-0.192284	-0.398365
R-HSA-9839383	TGFBR3 PTM regulation	-0.379834	0.0969099485930761	-0.138017	-0.308725	-0.17504	-0.310987
R-HSA-450341	Activation of the AP-1 family of transcription factors	-0.325767	-0.231589	-0.159767	-0.308048	-0.305712	-0.262468
R-HSA-1362277	Transcription of E2F targets under negative control by DREAM complex	-0.311343	-0.299367	-0.179938	-0.358181	-0.34971	-0.307927
R-HSA-4411364	Binding of TCF/LEF:CTNNB1 to target gene promoters	-0.338381	-0.310282	-0.23649	-0.339777	-0.297833	-0.338092
R-HSA-8866911	TFAP2 (AP-2) family regulates transcription of cell cycle factors	-0.399146	-0.406445	-0.30582	-0.406433	-0.364165	-0.418015
R-HSA-8951430	RUNX3 regulates WNT signaling	-0.367333	-0.325006	-0.253746	-0.358188	-0.315049	-0.366172
R-HSA-9764562	Regulation of CDH1 mRNA translation by microRNAs	-0.363469	-0.325563	-0.235384	-0.421993	-0.369227	-0.381242
R-HSA-112412	SOS-mediated signalling	-0.291627	-0.260152	-0.187851	-0.299949	-0.313923	-0.297525
R-HSA-2428933	SHC-related events triggered by IGF1R	-0.355382	-0.125728	-0.249855	-0.357621	-0.339084	-0.392471
R-HSA-5674135	MAP2K and MAPK activation	-0.245129	-0.162193	-0.134735	-0.244536	-0.218026	-0.220465
R-HSA-5675221	Negative regulation of MAPK pathway	-0.202149	-0.179282	-0.190033	-0.220262	-0.176978	-0.184513
R-HSA-8849471	PTK6 Regulates RHO GTPases, RAS GTPase and MAP kinases	-0.277104	-0.115016	-0.126811	-0.294689	-0.256149	-0.294273
R-HSA-8851805	MET activates RAS signaling	-0.227395	-0.180914	-0.094192	-0.163767	-0.222994	-0.154881
R-HSA-9026519	Activated NTRK2 signals through RAS	-0.257112	-0.143296	-0.304269	-0.202666	-0.21984	-0.263365
R-HSA-9034015	Signaling by NTRK3 (TRKC)	-0.210912	-0.0601212	-0.118937	-0.202719	-0.196481	-0.223245
R-HSA-9034864	Activated NTRK3 signals through RAS	-0.259439	-0.01403	-0.256715	-0.205672	-0.2305	-0.267737
R-HSA-8951936	RUNX3 regulates p14-ARF	-0.326875	-0.0894962	-0.0990188	-0.329473	-0.353912	-0.340453
R-HSA-8964026	Chylomicron clearance	-0.301507	0.108980640794931	-0.153409	-0.261136	-0.219143	-0.24215
R-HSA-2173791	TGF-beta receptor signaling in EMT (epithelial to mesenchymal transition)	-0.204448	-0.170207	-0.0984454	-0.276854	-0.252366	-0.209833
R-HSA-8941855	RUNX3 regulates CDKN1A transcription	-0.214602	-0.130621	-0.156518	-0.224544	-0.253781	-0.203639
R-HSA-167021	PLC-gamma1 signalling	-0.206795	0.234282489071858	0.0409496248091706	-0.239796	-0.259909	-0.295694
R-HSA-167060	NGF processing	-0.178138	0.238838224747465	0.228269233355804	-0.125976	-0.145469	-0.00567761
R-HSA-169893	Prolonged ERK activation events	-0.16208	-0.0973801	-0.185049	-0.146164	-0.110013	-0.144123
R-HSA-170968	Frs2-mediated activation	-0.165945	-0.107397	-0.183599	-0.162858	-0.123742	-0.146836
R-HSA-170984	ARMS-mediated activation	-0.125131	-0.0546525	-0.177631	-0.116744	-0.0845367	-0.130408
R-HSA-187015	Activation of TRKA receptors	-0.222504	0.264172704371142	-0.201214	-0.269691	-0.292382	-0.131424
R-HSA-187042	TRKA activation by NGF	-0.113201	0.465733823595945	0.177307156037082	-0.281453	-0.291715	-0.334385
R-HSA-187706	Signalling to p38 via RIT and RIN	-0.21858	-0.142541	-0.0711527	-0.268339	-0.206173	-0.19217
R-HSA-193697	p75NTR regulates axonogenesis	-0.158729	-0.114182	-0.0249089	-0.243675	-0.236076	-0.290115
R-HSA-198745	Signalling to STAT3	-0.24388	-0.145516	-0.0845467	-0.31791	-0.25846	-0.252033
R-HSA-205017	NFG and proNGF binds to p75NTR	-0.137709	0.244895196396378	0.301671885251548	-0.0776104	-0.0996441	-0.14513
R-HSA-205025	NADE modulates death signalling	-0.0332478	-0.0170193	-0.133384	-0.00655229	0.0162257006568771	-0.0783624
R-HSA-205043	NRIF signals cell death from the nucleus	-0.236556	-0.187439	-0.0916269	-0.25694	-0.19645	-0.20336
R-HSA-209563	Axonal growth stimulation	-0.195543	-0.197894	-0.0456103	-0.312318	-0.290952	-0.372285
R-HSA-9036866	Expression and Processing of Neurotrophins	-0.178138	0.238838224747465	0.228269233355804	-0.125976	-0.145469	-0.00567761
R-HSA-2032785	YAP1- and WWTR1 (TAZ)-stimulated gene expression	-0.102729	0.00472426194533557	-0.0610765	-0.094541	-0.136604	-0.0573447
R-HSA-5578768	Physiological factors	-0.199463	-0.101258	-0.137105	-0.179546	-0.208542	-0.209429
R-HSA-388479	Vasopressin-like receptors	0.144812644000807	0.10393261917727	0.285719217903213	0.211882488209274	0.184456929019232	0.136089355557676
R-HSA-193048	Androgen biosynthesis	0.0568708530533447	0.165647748005404	0.0214267902872545	0.0687142727484244	0.0357814312998401	-0.0121128
R-HSA-194002	Glucocorticoid biosynthesis	0.219999429307893	0.349953738434891	0.212191490985799	0.214230144069742	0.183057112410107	0.137022767813565
R-HSA-209952	Peptide hormone biosynthesis	-0.0220712	0.192721282051334	0.0487330947821027	-0.00517466	-0.0385815	-0.0868423
R-HSA-193993	Mineralocorticoid biosynthesis	-0.0643713	0.558998114808742	0.448931497065477	-0.197201	-0.224423	-0.265353
R-HSA-209776	Metabolism of amine-derived hormones	0.236674611494326	0.416739056288606	0.328812179102496	0.108515758176142	0.168128719188769	0.22437178182609
R-HSA-209822	Glycoprotein hormones	-0.302274	0.242547091421326	0.113392493612836	-0.329753	-0.358119	-0.396531
R-HSA-209968	Thyroxine biosynthesis	0.159837545763067	0.537431886644001	0.425342943452977	0.215994465170016	0.192059516688725	0.153301632755306
R-HSA-74713	IRS activation	-0.134649	-0.14842	-0.0292962	-0.166785	-0.15868	-0.145608
R-HSA-74749	Signal attenuation	-0.233088	-0.189431	-0.197285	-0.19559	-0.227718	-0.151685
R-HSA-8877330	RUNX1 and FOXP3 control the development of regulatory T lymphocytes (Tregs)	-0.345862	-0.233754	-0.351135	-0.289617	-0.309488	-0.276103
R-HSA-448706	Interleukin-1 processing	-0.206006	-0.208559	-0.0791727	-0.254949	-0.299747	-0.210432
R-HSA-5660668	CLEC7A/inflammasome pathway	-0.269143	-0.188353	-0.102854	-0.320872	-0.336852	-0.313213
R-HSA-1234158	Regulation of gene expression by Hypoxia-inducible Factor	-0.285468	-0.173397	-0.0360771	-0.285657	-0.279634	-0.29578
R-HSA-9020558	Interleukin-2 signaling	-0.281561	-0.192898	-0.126829	-0.312495	-0.332735	-0.184386
R-HSA-1462054	Alpha-defensins	-0.226779	-0.0432682	0.0921156297796468	-0.300141	-0.323648	-0.202055
R-HSA-449836	Other interleukin signaling	-0.113588	-0.0545893	-0.153307	-0.101634	-0.0888761	-0.0547754
R-HSA-8981607	Intracellular oxygen transport	-0.31143	0.869944788223038	-0.550615	-0.2285	-0.265815	-0.326131
R-HSA-1566977	Fibronectin matrix formation	-0.353347	0.429071648364279	-0.0146902	-0.29497	-0.320543	-0.353183
R-HSA-3000480	Scavenging by Class A Receptors	-0.256037	0.0901725725149832	-0.0391082	-0.204337	-0.196718	-0.274604
R-HSA-430116	GP1b-IX-V activation signalling	-0.158282	-0.0360973	-0.0786244	-0.188168	-0.153847	-0.179397
R-HSA-446107	Type I hemidesmosome assembly	-0.14408	0.28713112930787	-0.0731107	-0.099152	0.0833081188477414	-0.152678
R-HSA-352238	Breakdown of the nuclear lamina	-0.0116871	-0.0217857	-0.0454333	-0.0104926	0.0246522237552342	-0.00993184
R-HSA-1369062	ABC transporters in lipid homeostasis	0.051140693211593	0.127100150426906	0.108816989450849	0.0857818174200988	0.0918350342174009	0.0408103572296021
R-HSA-8963888	Chylomicron assembly	-0.268826	0.0165298003924728	-0.0802572	-0.181623	-0.0980162	-0.279032
R-HSA-8963901	Chylomicron remodeling	-0.352299	-0.0136429	-0.235113	-0.29486	-0.220697	-0.359681
R-HSA-8964058	HDL remodeling	-0.413995	0.0448517544871856	-0.118289	-0.358928	-0.219405	-0.382597
R-HSA-8866423	VLDL assembly	-0.23711	-0.0653974	0.0519731536253855	-0.131755	-0.108054	-0.246896
R-HSA-8964046	VLDL clearance	-0.282892	-0.10842	0.0114422031863408	-0.237692	-0.191342	-0.289458
R-HSA-354194	GRB2:SOS provides linkage to MAPK signaling for Integrins	-0.266621	-0.0224944	-0.141322	-0.290236	-0.234488	-0.266713
R-HSA-372708	p130Cas linkage to MAPK signaling for integrins	-0.266897	-0.0395959	-0.154755	-0.272264	-0.221285	-0.269173
R-HSA-9619665	EGR2 and SOX10-mediated initiation of Schwann cell myelination	-0.134459	-0.0283104	-0.034606	-0.128268	-0.0984391	-0.0862575
R-HSA-181431	Acetylcholine binding and downstream events	-0.0881571	0.151863034303824	-0.11083	-0.0202416	-0.0487311	-0.0983087
R-HSA-622323	Presynaptic nicotinic acetylcholine receptors	0.0491647556680586	0.379609806890575	0.112030882912298	0.113403244789247	0.0891458373369334	0.0401508340768852
R-HSA-622327	Postsynaptic nicotinic acetylcholine receptors	-0.0881571	0.151863034303824	-0.11083	-0.0202416	-0.0487311	-0.0983087
R-HSA-629594	Highly calcium permeable postsynaptic nicotinic acetylcholine receptors	-0.270906	0.0840103028890172	-0.203883	-0.217358	-0.23149	-0.276106
R-HSA-629597	Highly calcium permeable nicotinic acetylcholine receptors	-0.261973	0.37270151532233	-0.0500497	-0.209459	-0.221022	-0.270697
R-HSA-425381	Bicarbonate transporters	-0.235547	-0.129177	0.06087446206284	-0.235601	0.0125733871928792	-0.245144
R-HSA-189451	Heme biosynthesis	-0.137479	-0.105251	0.0263692875401894	-0.124291	0.0736393431439247	-0.0421037
R-HSA-6799990	Metal sequestration by antimicrobial proteins	-0.404024	-0.311907	-0.0715725	0.0464862561137037	-0.278677	-0.311952
R-HSA-5660526	Response to metal ions	-0.342857	0.00314030240278895	-0.0776003	-0.31317	-0.116196	-0.341982
R-HSA-5661231	Metallothioneins bind metals	-0.326554	0.0405895350797027	-0.0288306	-0.338141	-0.0312944	-0.321534
R-HSA-5621480	Dectin-2 family	-0.344237	-0.210442	-0.0515998	-0.337203	-0.328662	-0.278409
R-HSA-9708296	tRNA-derived small RNA (tsRNA or tRNA-related fragment, tRF) biogenesis	-0.149036	-0.249216	0.0578761285902225	-0.387329	-0.402987	-0.0626879
R-HSA-5674499	Negative feedback regulation of MAPK pathway	-0.321836	-0.314728	-0.229076	-0.340825	-0.272892	-0.268739
R-HSA-444473	Formyl peptide receptors bind formyl peptides and many other ligands	-0.328924	-0.0883108	-0.0420658	-0.330595	-0.288457	-0.24279
R-HSA-444821	Relaxin receptors	0.497609391238056	0.455143002833998	0.367612328198945	0.528272325716199	0.509812935197403	0.491514011705767
R-HSA-3000484	Scavenging by Class F Receptors	-0.226747	-0.0600982	-0.06711	-0.2134	-0.182958	-0.146031
R-HSA-3000497	Scavenging by Class H Receptors	-0.583916	0.169209248258032	-0.270924	-0.612884	-0.637178	-0.453768
R-HSA-432142	Platelet sensitization by LDL	-0.136632	-0.10527	-0.0935687	-0.168982	-0.147546	-0.151445
R-HSA-8964041	LDL remodeling	-0.221106	0.0128615484497238	0.0911463714900902	-0.0958046	-0.113078	-0.231101
R-HSA-192456	Digestion of dietary lipid	0.30714346331066	0.247707470120933	0.107165067970832	0.345592723951874	0.323079295478958	0.299395414460884
R-HSA-8939246	RUNX1 regulates transcription of genes involved in differentiation of myeloid cells	-0.195326	0.0514249159813306	-0.166196	-0.148331	-0.148977	-0.233236
R-HSA-8849473	PTK6 Expression	-0.260012	-0.303752	0.0128401662615022	-0.393129	-0.358054	-0.331141
R-HSA-9768759	Regulation of NPAS4 gene expression	-0.231357	-0.291624	-0.0741615	-0.432132	-0.347008	-0.232264
R-HSA-9768777	Regulation of NPAS4 gene transcription	-0.589414	-0.238124	-0.202237	-0.551299	-0.373233	-0.247218
R-HSA-9839394	TGFBR3 expression	-0.226134	-0.115584	-0.159557	-0.253477	-0.232878	-0.214837
R-HSA-879415	Advanced glycosylation endproduct receptor signaling	-0.308541	-0.0853246	-0.0106868	-0.277272	-0.284	-0.240669
R-HSA-9652282	Drug-mediated inhibition of ERBB2 signaling	-0.322662	-0.133335	-0.116283	-0.325295	-0.263445	-0.250909
R-HSA-187024	NGF-independant TRKA activation	-0.18433	0.279128832828427	-0.247599	-0.238422	-0.261163	-0.0852599
R-HSA-111448	Activation of NOXA and translocation to mitochondria	-0.228674	-0.25622	-0.123728	-0.258034	-0.290733	-0.218191
R-HSA-2559584	Formation of Senescence-Associated Heterochromatin Foci (SAHF)	-0.242939	-0.258123	-0.118258	-0.283678	-0.264603	-0.258974
R-HSA-6811555	PI5P Regulates TP53 Acetylation	-0.20126	-0.184961	-0.0928733	-0.1987	-0.238226	-0.208697
R-HSA-69560	Transcriptional activation of p53 responsive genes	-0.252198	-0.266843	-0.157285	-0.26604	-0.298366	-0.242657
R-HSA-69895	Transcriptional activation of cell cycle inhibitor p21	-0.252198	-0.266843	-0.157285	-0.26604	-0.298366	-0.242657
R-HSA-2142670	Synthesis of epoxy (EET) and dihydroxyeicosatrienoic acids (DHET)	-0.330757	-0.30506	-0.456533	-0.34524	-0.293909	-0.40237
R-HSA-2142816	Synthesis of (16-20)-hydroxyeicosatetraenoic acids (HETE)	-0.27837	-0.272508	-0.419728	-0.24831	-0.24501	-0.321073
R-HSA-9018677	Biosynthesis of DHA-derived SPMs	-0.0316919	0.0956711540366255	-0.0720899	-0.0607477	-0.067439	-0.116837
R-HSA-9018678	Biosynthesis of specialized proresolving mediators (SPMs)	-0.0316054	0.0889443059238575	-0.0293563	-0.0125231	-0.0691602	-0.0927455
R-HSA-9018681	Biosynthesis of protectins	-0.313484	-0.389374	-0.438174	-0.40761	-0.390871	-0.453295
R-HSA-1236973	Cross-presentation of particulate exogenous antigens (phagosomes)	-0.393515	0.16654452090205	0.303466257828971	-0.395236	-0.41771	-0.369552
R-HSA-5668599	RHO GTPases Activate NADPH Oxidases	-0.220347	-0.212688	-0.053654	-0.243128	-0.269378	-0.15279
R-HSA-804914	Transport of fatty acids	0.0849309179835795	-0.0529927	0.213437824724002	-0.0605365	0.00717893757043908	-0.0398358
R-HSA-380612	Metabolism of serotonin	0.336051086040226	0.68481890527566	0.369068469621676	0.40743425423589	0.376529453301078	0.324795449809598
R-HSA-380615	Serotonin clearance from the synaptic cleft	0.124533789180259	0.669715533464845	0.122758430536837	0.195776910933001	0.164853893850566	0.114176290332437
R-HSA-210990	PECAM1 interactions	-0.206373	-0.0730162	-0.0332598	-0.241217	-0.203749	-0.154234
R-HSA-9839406	TGFBR3 regulates activin signaling	-0.265596	0.356559688896447	0.231047479475371	-0.305649	-0.334981	-0.374016
R-HSA-8941413	Events associated with phagocytolytic activity of PMN cells	-0.53345	0.0642823643789648	-0.0403937	-0.826088	-0.831933	-0.850534
R-HSA-71032	Propionyl-CoA catabolism	0.00554977028853665	0.302476398114001	-0.185806	0.0748371031033191	0.0469454849367704	-0.00522744
R-HSA-156581	Methylation	-0.105888	-0.0156013	-0.0401185	-0.0920212	-0.0700072	-0.0702774
R-HSA-211957	Aromatic amines can be N-hydroxylated or N-dealkylated by CYP1A2	0.302115686809535	0.236622295797684	0.122422800176824	0.352336231384162	0.324471565949651	0.292075739509136
R-HSA-9018682	Biosynthesis of maresins	0.126899887821179	0.242408160294322	0.106691084838413	0.192592419251149	0.165055335345882	0.117517211846929
R-HSA-9027307	Biosynthesis of maresin-like SPMs	0.593212959434626	0.537966477571556	0.444989277632688	0.633215641713803	0.610029761330092	0.585003023922502
R-HSA-211999	CYP2E1 reactions	0.666866182699634	0.61320026232053	0.526043885503541	0.704421297567983	0.68194057965088	0.658807825477178
R-HSA-72731	Recycling of eIF2:GDP	-0.273294	-0.0131635	0.146179592865803	-0.251207	-0.351483	-0.208623
R-HSA-9633012	Response of EIF2AK4 (GCN2) to amino acid deficiency	-0.0281137	-0.307435	0.0763087054253773	-0.409551	-0.372749	-0.0393771
R-HSA-9840373	Cellular response to mitochondrial stress	-0.422409	-0.259139	0.0192005540065928	-0.452142	-0.402885	-0.364745
R-HSA-156842	Eukaryotic Translation Elongation	0.0239332226701522	-0.392991	0.108882394568422	-0.464275	-0.409546	-0.00766998
R-HSA-156902	Peptide chain elongation	0.0378711765673741	-0.394588	0.126411884259829	-0.466325	-0.407884	-0.00102121
R-HSA-2408557	Selenocysteine synthesis	0.030996917565506	-0.390108	0.119570262569933	-0.466581	-0.405385	-0.0041987
R-HSA-72764	Eukaryotic Translation Termination	0.0322486881170078	-0.392142	0.117398607781163	-0.468068	-0.400016	-0.00259807
R-HSA-975956	Nonsense Mediated Decay (NMD) independent of the Exon Junction Complex (EJC)	-0.0496138	-0.379495	0.0727585625730853	-0.479659	-0.424187	-0.0813593
R-HSA-8866904	Negative regulation of activity of TFAP2 (AP-2) family transcription factors	-0.253422	-0.221746	-0.118384	-0.247054	-0.244347	-0.208738
R-HSA-8866906	TFAP2 (AP-2) family regulates transcription of other transcription factors	-0.188198	-0.320249	0.188653992132971	-0.434489	-0.243579	-0.42087
R-HSA-8869496	TFAP2A acts as a transcriptional repressor during retinoic acid induced cell differentiation	0.0440368331513215	-0.317736	0.016576486518463	-0.291451	-0.260485	0.0189672565480888
R-HSA-9834899	Specification of the neural plate border	-0.180576	-0.122779	-0.041331	-0.159025	-0.180555	-0.175402
R-HSA-446343	Localization of the PINCH-ILK-PARVIN complex to focal adhesions	-0.420158	-0.107728	-0.255866	-0.409546	-0.365301	-0.419118
R-HSA-446353	Cell-extracellular matrix interactions	-0.259278	-0.116997	-0.106347	-0.238177	-0.237195	-0.222047
R-HSA-8875513	MET interacts with TNS proteins	-0.309851	0.326811537743354	-0.0222973	-0.200195	-0.285546	-0.271041
R-HSA-844623	The IPAF inflammasome	0.000820723543965618	-0.0707971	0.129079699480959	0.0831264752448035	0.0459233814790964	-0.0140142
R-HSA-389513	Co-inhibition by CTLA4	-0.196204	-0.152985	-0.114586	-0.246241	-0.204845	-0.163773
R-HSA-9706374	FLT3 signaling through SRC family kinases	-0.382388	-0.294208	-0.0751665	-0.410005	-0.373848	-0.243352
R-HSA-9032500	Activated NTRK2 signals through FYN	-0.227029	-0.0913152	-0.0423803	-0.244699	-0.202768	-0.169486
R-HSA-9032759	NTRK2 activates RAC1	-0.299673	-0.148427	0.0335722594551018	-0.289735	-0.236898	-0.16429
R-HSA-1483191	Synthesis of PC	-0.213857	-0.215561	-0.0676644	-0.299287	-0.32362	-0.224363
R-HSA-113501	Inhibition of replication initiation of damaged DNA by RB1/E2F1	-0.197396	-0.2024	-0.214024	-0.186038	-0.163192	-0.17197
R-HSA-1362300	Transcription of E2F targets under negative control by p107 (RBL1) and p130 (RBL2) in complex with HDAC1	-0.280781	-0.257527	-0.248844	-0.297192	-0.303696	-0.301953
R-HSA-176417	Phosphorylation of Emi1	-0.168824	-0.143865	-0.228811	-0.145082	-0.153315	-0.149842
R-HSA-9820865	Z-decay: degradation of maternal mRNAs by zygotically expressed factors	-0.268113	-0.385728	-0.0464275	-0.472313	-0.446183	-0.277249
R-HSA-71288	Creatine metabolism	0.413072125832293	0.148204225198602	0.168324033981878	0.256041783195926	0.229661	0.330990778075696
R-HSA-2197563	NOTCH2 intracellular domain regulates transcription	-0.234742	0.0180225450203105	0.0595474363150258	-0.214964	-0.258855	-0.157961
R-HSA-110362	POLB-Dependent Long Patch Base Excision Repair	-0.181689	-0.117435	-0.0896854	-0.169715	-0.143138	-0.164961
R-HSA-110373	Resolution of AP sites via the multiple-nucleotide patch replacement pathway	-0.18001	-0.172738	-0.0685696	-0.191582	-0.177111	-0.0954194
R-HSA-110381	Resolution of AP sites via the single-nucleotide replacement pathway	-0.231265	-0.212749	-0.230654	-0.223355	-0.242849	-0.176914
R-HSA-5651801	PCNA-Dependent Long Patch Base Excision Repair	-0.163331	-0.21151	-0.078273	-0.179786	-0.18005	-0.0775011
R-HSA-73930	Abasic sugar-phosphate removal via the single-nucleotide replacement pathway	-0.226444	-0.315221	-0.195529	-0.213703	-0.232919	-0.281977
R-HSA-209905	Catecholamine biosynthesis	-0.103566	-0.164364	0.34414558327545	-0.309798	-0.300948	-0.115889
R-HSA-2142688	Synthesis of 5-eicosatetraenoic acids	-0.0877015	0.174622737027758	0.17488940605432	0.0223329492308101	-0.101736	-0.0435876
R-HSA-2161541	Abacavir metabolism	-0.191007	-0.231611	0.290098312053703	-0.118814	-0.146657	-0.200947
R-HSA-629587	Highly sodium permeable postsynaptic acetylcholine nicotinic receptors	0.0491647556680586	0.379609806890575	0.112030882912298	0.113403244789247	0.0891458373369334	0.0401508340768852
R-HSA-390696	Adrenoceptors	-0.290127	-0.199424	-0.0749586	-0.242623	-0.117365	-0.167691
R-HSA-70370	Galactose catabolism	0.0795643290468817	-0.157596	-0.0522019	-0.0401487	-0.0810472	-0.115697
R-HSA-9830364	Formation of the nephric duct	-0.233184	-0.0262899	-0.0969461	-0.223799	-0.206868	-0.183095
R-HSA-5696400	Dual Incision in GG-NER	-0.256131	-0.261774	-0.125749	-0.302332	-0.263638	-0.214561
R-HSA-190704	Oligomerization of connexins into connexons	0.0943080763370071	-0.019032	-0.0740613	-0.041174	-0.0705171	0.0337156699467646
R-HSA-190827	Transport of connexins along the secretory pathway	0.0943080763370071	-0.019032	-0.0740613	-0.041174	-0.0705171	0.0337156699467646
R-HSA-193634	Axonal growth inhibition (RHOA activation)	-0.172134	-0.122474	-0.063204	-0.262895	-0.253552	-0.308088
R-HSA-193692	Regulated proteolysis of p75NTR	-0.30802	-0.1684	-0.232994	-0.311755	-0.291735	-0.307923
R-HSA-5635851	GLI proteins bind promoters of Hh responsive genes to promote transcription	0.310403591308624	0.258256569746891	0.121971562198497	0.368723453645566	0.344229869828457	0.300209159452222
R-HSA-390648	Muscarinic acetylcholine receptors	-0.110023	-0.168118	-0.148148	-0.0568024	0.0582467296883168	-0.123876
R-HSA-9911233	Expression of NOTCH2NL genes	0.210077042057699	0.202558271066387	0.226651124543934	0.188680766163117	0.211367853639435	0.246866661894957
R-HSA-166020	Transfer of LPS from LBP carrier to CD14	-0.0908413	0.311468418983253	-0.230757	-0.638423	-0.650013	-0.681798
R-HSA-8851907	MET activates PI3K/AKT signaling	-0.0389207	0.0578230063608491	0.0755868152728434	0.0333471674698028	-0.0779404	-0.0468098
R-HSA-8865999	MET activates PTPN11	-0.0455619	0.132045690449115	0.0801562696238894	-0.0263161	-0.0496644	-0.021401
R-HSA-8875555	MET activates RAP1 and RAC1	-0.249872	-0.0986653	-0.00243653	-0.21993	-0.217516	-0.187562
R-HSA-8875656	MET receptor recycling	-0.151905	-0.0153513	-0.125202	-0.0812574	-0.113329	-0.13643
R-HSA-8875791	MET activates STAT3	-0.250934	-0.273935	-0.0668638	-0.223042	-0.220177	-0.203868
R-HSA-9022699	MECP2 regulates neuronal receptors and channels	-0.242821	-0.187264	-0.170064	-0.222045	-0.225172	-0.227625
R-HSA-9734091	Drug-mediated inhibition of MET activation	-0.0659017	0.0278196310092609	0.223488866410377	0.126644488304811	-0.0429098	0.0303875818351629
R-HSA-8939247	RUNX1 regulates transcription of genes involved in interleukin signaling	-0.379405	-0.134538	-0.403581	-0.318842	-0.342987	-0.388566
R-HSA-1663150	The activation of arylsulfatases	-0.322138	0.105796310124826	0.0359448724311894	-0.264633	-0.294501	-0.332705
R-HSA-390666	Serotonin receptors	-0.437898	-0.0404819	-0.0860851	-0.386291	0.103321884951074	-0.19061
R-HSA-392023	Adrenaline signalling through Alpha-2 adrenergic receptor	-0.364466	-0.39835	-0.46085	-0.329705	-0.345857	-0.370787
R-HSA-9761174	Formation of intermediate mesoderm	-0.277233	0.208927357764539	-0.224747	-0.271309	-0.297276	-0.0864918
R-HSA-190873	Gap junction degradation	-0.231465	-0.178342	-0.00103768	-0.21157	-0.20204	-0.128101
R-HSA-196025	Formation of annular gap junctions	-0.240624	-0.184397	0.00208956455943726	-0.217554	-0.22975	-0.129412
R-HSA-6783984	Glycine degradation	-0.0778215	-0.0475373	0.0338386729338217	-0.0441541	-0.0508211	-0.0393016
R-HSA-9853506	OGDH complex synthesizes succinyl-CoA from 2-OG	-0.0834471	-0.0280675	0.0393704621152342	-0.0535122	-0.0613816	-0.0361683
R-HSA-9858328	OADH complex synthesizes glutaryl-CoA from 2-OA	-0.0651224	-0.00112925	0.0683270304102675	-0.0386719	-0.0440582	-0.0165592
R-HSA-9859138	BCKDH synthesizes BCAA-CoA from KIC, KMVA, KIV	-0.0707793	-0.108454	0.192479492141845	-0.113465	-0.138124	-0.0789285
R-HSA-174411	Polymerase switching on the C-strand of the telomere	-0.253099	-0.286784	0.0622691672371215	-0.284589	-0.255593	-0.208115
R-HSA-174417	Telomere C-strand (Lagging Strand) Synthesis	-0.230836	-0.277791	0.0490583949576046	-0.26127	-0.242156	-0.180977
R-HSA-174430	Telomere C-strand synthesis initiation	-0.309981	-0.293206	0.0862871649700805	-0.322887	-0.29645	-0.280866
R-HSA-68952	DNA replication initiation	-0.337745	-0.0995167	-0.212078	-0.276443	-0.305209	-0.0525598
R-HSA-69091	Polymerase switching	-0.0927398	-0.125514	0.0855476590156801	-0.134774	-0.124306	-0.0135252
R-HSA-69109	Leading Strand Synthesis	-0.0927398	-0.125514	0.0855476590156801	-0.134774	-0.124306	-0.0135252
R-HSA-69166	Removal of the Flap Intermediate	-0.123409	-0.11849	0.130477532992577	-0.106288	-0.0960355	0.0156599654342557
R-HSA-69183	Processive synthesis on the lagging strand	-0.122966	-0.118256	0.129895846087272	-0.105816	-0.0957219	0.015418685993071
R-HSA-69186	Lagging Strand Synthesis	-0.0769881	-0.118464	0.0580047167583643	-0.0892229	-0.0902834	0.00787376823604452
R-HSA-2142691	Synthesis of Leukotrienes (LT) and Eoxins (EX)	-0.0849626	0.140678752913566	0.00645389904814031	-0.0158764	-0.0495185	-0.127934
R-HSA-2142700	Biosynthesis of Lipoxins (LX)	-0.0788424	0.150772662810538	0.034161529912054	0.09117247330285	-0.041998	-0.0316285
R-HSA-9018676	Biosynthesis of D-series resolvins	-0.128299	0.113236856127055	-0.0322182	-0.110637	-0.136649	-0.142009
R-HSA-9018679	Biosynthesis of EPA-derived SPMs	-0.0594706	0.146272421613623	0.00200747328229678	-0.158346	-0.183271	-0.183881
R-HSA-9018683	Biosynthesis of DPA-derived SPMs	-0.0435949	0.204646551912753	-0.0346036	-0.0954707	-0.120174	-0.163566
R-HSA-9018896	Biosynthesis of E-series 18(S)-resolvins	-0.0512406	0.166936272085286	0.0227851219716871	-0.163095	-0.18845	-0.179805
R-HSA-9020265	Biosynthesis of aspirin-triggered D-series resolvins	-0.187824	0.071796530907861	-0.0717115	-0.160373	-0.185252	-0.201128
R-HSA-9023661	Biosynthesis of E-series 18(R)-resolvins	-0.102456	0.130827738497283	-0.0101042	-0.211926	-0.236062	-0.236406
R-HSA-9025094	Biosynthesis of DPAn-3 SPMs	-0.0435949	0.204646551912753	-0.0346036	-0.0954707	-0.120174	-0.163566
R-HSA-9026286	Biosynthesis of DPAn-3-derived protectins and resolvins	-0.0496601	0.117560924675885	-0.0279317	-0.12098	-0.145341	-0.192034
R-HSA-9026290	Biosynthesis of DPAn-3-derived maresins	-0.0999979	0.177403230555664	-0.0772836	-0.0374629	-0.0632177	-0.108522
R-HSA-9026403	Biosynthesis of DPAn-3-derived 13-series resolvins	-0.136782	0.0504081524165528	-0.0956096	-0.06098	-0.0995454	-0.150364
R-HSA-9027604	Biosynthesis of electrophilic 蠅-3 PUFA oxo-derivatives	-0.143174	0.0302328269812819	-0.11513	-0.0677544	-0.106244	-0.15678
R-HSA-156587	Amino Acid conjugation	-0.125517	0.628498793834756	0.589589736576494	-0.0647614	0.645017767620507	-0.132603
R-HSA-159424	Conjugation of carboxylic acids	-0.125517	0.628498793834756	0.589589736576494	-0.0647614	0.645017767620507	-0.132603
R-HSA-177128	Conjugation of salicylate with glycine	-0.132358	0.714771563204261	0.659796959812697	-0.068521	0.735929542439762	-0.139743
R-HSA-1483115	Hydrolysis of LPC	-0.0258311	-0.086794	-0.23388	0.0455825405824613	0.0127259657374258	-0.0369347
R-HSA-110320	Translesion Synthesis by POLH	-0.228931	-0.208988	-0.0469648	-0.278306	-0.244931	-0.190608
R-HSA-1253288	Downregulation of ERBB4 signaling	-0.217012	-0.193381	-0.114991	-0.288929	-0.225349	-0.192864
R-HSA-3134975	Regulation of innate immune responses to cytosolic DNA	-0.249083	-0.226273	-0.102351	-0.308582	-0.248934	-0.229318
R-HSA-5696397	Gap-filling DNA repair synthesis and ligation in GG-NER	-0.237049	-0.240518	-0.102366	-0.29103	-0.258177	-0.179952
R-HSA-8849469	PTK6 Regulates RTKs and Their Effectors AKT1 and DOK1	-0.259385	-0.227238	-0.0920327	-0.327415	-0.288881	-0.242928
R-HSA-8948747	Regulation of PTEN localization	-0.234391	-0.21323	-0.0866858	-0.277814	-0.225951	-0.235784
R-HSA-9664873	Pexophagy	-0.217296	-0.23045	-0.105586	-0.272457	-0.218237	-0.183168
R-HSA-975110	TRAF6 mediated IRF7 activation in TLR7/8 or 9 signaling	-0.271471	-0.215454	-0.152301	-0.301261	-0.28135	-0.271013
R-HSA-417973	Adenosine P1 receptors	0.153823575120855	0.0975341388202184	-0.00138186	0.221882810122765	0.184484516858161	0.143815781044578
R-HSA-111932	CaMK IV-mediated phosphorylation of CREB	-0.302146	-0.106701	-0.105014	-0.312483	-0.299789	-0.306288
R-HSA-111957	Cam-PDE 1 activation	0.0856596598956707	0.0400651827932929	0.452704069443908	0.0218544611788181	0.127013172119692	0.0764284594461255
R-HSA-180024	DARPP-32 events	-0.223028	-0.215477	-0.190614	-0.237467	-0.197852	-0.188191
R-HSA-442720	CREB1 phosphorylation through the activation of Adenylate Cyclase	-0.243361	-0.131186	-0.0689723	-0.3169	-0.262474	-0.140836
R-HSA-442729	CREB1 phosphorylation through the activation of CaMKII/CaMKK/CaMKIV cascasde	-0.276367	-0.166225	-0.142373	-0.292756	-0.315495	-0.298699
R-HSA-451306	Ionotropic activity of kainate receptors	-0.0424555	-0.00845525	0.112776301817865	-0.0726204	-0.0863814	-0.0267586
R-HSA-451308	Activation of Ca-permeable Kainate Receptor	-0.0424555	-0.00845525	0.112776301817865	-0.0726204	-0.0863814	-0.0267586
R-HSA-9619229	Activation of RAC1 downstream of NMDARs	-0.324328	-0.283049	-0.00111399	-0.345166	-0.310288	-0.260346
R-HSA-191650	Regulation of gap junction activity	-0.107742	-0.08478	-0.0960782	-0.1415	-0.168901	-0.116542
R-HSA-8941284	RUNX2 regulates chondrocyte maturation	-0.345002	-0.226228	-0.142423	-0.341704	-0.369176	-0.353788
R-HSA-1362409	Mitochondrial iron-sulfur cluster biogenesis	-0.348415	-0.346927	-0.382148	-0.344287	-0.0678443	-0.405493
R-HSA-2395516	Electron transport from NADPH to Ferredoxin	0.430778684926697	0.391624967079273	0.329646211921693	0.458168729698885	0.442015626371697	0.424282328153806
R-HSA-75108	Activation, myristolyation of BID and translocation to mitochondria	-0.412527	-0.312642	-0.0379154	-0.413308	-0.319001	-0.393985
R-HSA-1300645	Acrosome Reaction and Sperm:Oocyte Membrane Binding	-0.152247	0.0760679569011128	-0.244023	-0.0947243	0.0198056066099546	-0.0647651
R-HSA-111447	Activation of BAD and translocation to mitochondria	-0.157069	-0.0908581	-0.0904247	-0.201874	-0.150379	-0.15658
R-HSA-844455	The NLRP1 inflammasome	-0.432537	-0.385669	-0.185844	-0.392465	-0.177963	-0.354921
R-HSA-8949275	RUNX3 Regulates Immune Response and Cell Migration	-0.482542	0.0920148031405092	-0.272088	-0.464795	-0.480125	-0.300933
R-HSA-5676934	Protein repair	-0.460079	-0.183718	-0.0828607	-0.417533	-0.116657	-0.385295
R-HSA-211935	Fatty acids	0.119935321961541	0.0475302753261199	-0.0907191	0.187397174689294	0.154802913231775	0.107708916800094
R-HSA-211958	Miscellaneous substrates	0.232852199274994	0.152596295501819	0.0160255210756901	0.303107676680298	0.273675431306571	0.21838945168771
R-HSA-381183	ATF6 (ATF6-alpha) activates chaperone genes	-0.16262	0.103145633552276	-0.0266932	-0.0975266	-0.15495	-0.137706
R-HSA-8963676	Intestinal absorption	-0.0399253	-0.091232	0.401313902252239	-0.156341	0.00381834388492358	-0.243593
R-HSA-8981373	Intestinal hexose absorption	-0.0399253	-0.091232	0.401313902252239	-0.156341	0.00381834388492358	-0.243593
R-HSA-500753	Pyrimidine biosynthesis	-0.0651341	-0.114608	0.427944261546124	-0.143405	-0.174966	-0.075223
R-HSA-156582	Acetylation	0.45747950774624	-0.280616	-0.403318	-0.165276	-0.194418	0.449164535259907
R-HSA-77286	mitochondrial fatty acid beta-oxidation of saturated fatty acids	-0.102613	-0.058954	-0.0815202	-0.143142	-0.0728357	-0.0206334
R-HSA-77288	mitochondrial fatty acid beta-oxidation of unsaturated fatty acids	-0.131967	-0.310181	0.0562781542646985	-0.200679	-0.102806	-0.0251429
R-HSA-77346	Beta oxidation of decanoyl-CoA to octanoyl-CoA-CoA	-0.162105	-0.213373	-0.0614608	-0.244646	-0.134641	-0.0442623
R-HSA-77348	Beta oxidation of octanoyl-CoA to hexanoyl-CoA	-0.171325	-0.22224	-0.064171	-0.258164	-0.143919	-0.0498982
R-HSA-190374	FGFR1c and Klotho ligand binding and activation	-0.0624835	0.450736539103574	-0.290273	0.0163807891142784	-0.0225618	-0.0756659
R-HSA-8849470	PTK6 Regulates Cell Cycle	-0.230177	-0.193726	-0.102269	-0.196839	-0.221111	-0.272912
R-HSA-9754119	Drug-mediated inhibition of CDK4/CDK6 activity	-0.193224	-0.271791	-0.23176	-0.264053	-0.237327	-0.298578
R-HSA-73843	5-Phosphoribose 1-diphosphate biosynthesis	-0.327815	-0.114513	0.209045711862711	-0.410057	-0.417515	-0.333019
R-HSA-174414	Processive synthesis on the C-strand of the telomere	-0.283325	-0.322	0.080247094508506	-0.324347	-0.287743	-0.199673
R-HSA-174437	Removal of the Flap Intermediate from the C-strand	-0.306094	-0.328454	0.0821898539731119	-0.333535	-0.294609	-0.223657
R-HSA-5358508	Mismatch Repair	-0.126056	-0.15008	0.0840535335375528	-0.161461	-0.127237	-0.0130376
R-HSA-5358565	Mismatch repair (MMR) directed by MSH2:MSH6 (MutSalpha)	-0.138002	-0.161202	0.0762711540298137	-0.174148	-0.13916	-0.0229951
R-HSA-5358606	Mismatch repair (MMR) directed by MSH2:MSH3 (MutSbeta)	-0.126072	-0.150085	0.0842326075109684	-0.161555	-0.127277	-0.013022
R-HSA-9758920	Formation of lateral plate mesoderm	0.0444061961840991	0.119077723855134	-0.00950306	-0.0357242	-0.0630435	0.133356955865021
R-HSA-446388	Regulation of cytoskeletal remodeling and cell spreading by IPP complex components	-0.214048	-0.159108	-0.126712	-0.15646	-0.158055	-0.227034
R-HSA-351906	Apoptotic cleavage of cell adhesion proteins	-0.108972	0.00433182196484933	0.00771476701731033	-0.117431	-0.107101	-0.109833
R-HSA-8934593	Regulation of RUNX1 Expression and Activity	-0.194868	-0.205565	-0.138201	-0.299593	-0.267101	-0.218184
R-HSA-9603381	Activated NTRK3 signals through PI3K	-0.176484	-0.0109664	-0.0303018	-0.185074	-0.205186	-0.177043
R-HSA-1834941	STING mediated induction of host immune responses	-0.214406	-0.178937	-0.0508763	-0.213654	-0.112993	-0.220106
R-HSA-3270619	IRF3-mediated induction of type I IFN	-0.240173	-0.189739	-0.0399253	-0.246852	-0.145822	-0.244444
R-HSA-5627083	RHO GTPases regulate CFTR trafficking	-0.323038	-0.371577	0.0695741222674101	-0.54806	-0.540861	-0.327489
R-HSA-211979	Eicosanoids	-0.0931239	-0.165844	-0.0535848	-0.0596635	-0.0878767	0.157046490278586
R-HSA-5358493	Synthesis of diphthamide-EEF2	0.253696954808458	0.0543319252595098	0.363038321858401	0.105131835335585	0.0849469881707679	0.303093468338279
R-HSA-196843	Vitamin B2 (riboflavin) metabolism	-0.0351424	-0.173481	0.224688332700302	-0.203422	-0.233428	-0.277922
R-HSA-9010642	ROBO receptors bind AKAP5	-0.194674	-0.160262	-0.0482214	-0.324581	-0.251318	-0.085654
R-HSA-390651	Dopamine receptors	0.188745014868168	0.513551497693909	0.491895497007794	0.24827314121577	0.226752285838065	0.180401913192283
R-HSA-111367	SLBP independent Processing of Histone Pre-mRNAs	-0.425573	-0.37735	-0.130329	-0.465101	-0.460937	-0.434697
R-HSA-77588	SLBP Dependent Processing of Replication-Dependent Histone Pre-mRNAs	-0.410972	-0.367203	-0.13275	-0.446832	-0.443547	-0.420237
R-HSA-5662702	Melanin biosynthesis	-0.0642739	0.524793936760162	0.447831432588834	-0.00701901	-0.029389	-0.0717559
R-HSA-8983432	Interleukin-15 signaling	-0.185057	-0.15	-0.109419	-0.227137	-0.235552	-0.161807
R-HSA-112313	Neurotransmitter uptake and metabolism In glial cells	0.0563684060187835	0.133390881107766	0.258182472362479	-0.0447428	0.0928790381641803	-0.140271
R-HSA-210455	Astrocytic Glutamate-Glutamine Uptake And Metabolism	0.0563684060187835	0.133390881107766	0.258182472362479	-0.0447428	0.0928790381641803	-0.140271
R-HSA-5652227	Fructose biosynthesis	-0.1732	-0.24288	-0.413375	-0.0973007	-0.126003	-0.184317
R-HSA-420597	Nectin/Necl trans heterodimerization	-0.0936808	-0.0166151	0.127390346226772	-0.0241698	-0.127224	-0.104086
R-HSA-8985947	Interleukin-9 signaling	-0.293493	-0.190029	-0.23841	-0.27697	-0.28106	-0.211508
R-HSA-5576890	Phase 3 - rapid repolarisation	-0.192329	-0.0940585	-0.232197	-0.125184	-0.00855026	-0.202837
R-HSA-5576893	Phase 2 - plateau phase	-0.212899	0.188283788602008	-0.0344857	-0.178386	-0.087105	-0.221349
R-HSA-977068	Termination of O-glycan biosynthesis	-0.249494	-0.115185	-0.260067	-0.17368	-0.208188	-0.262197
R-HSA-9025106	Biosynthesis of DPAn-6 SPMs	0.510137897307818	0.88348227761171	0.316203244653061	-0.116692	-0.14258	-0.187554
R-HSA-163358	PKA-mediated phosphorylation of key metabolic factors	-0.272536	-0.180219	-0.0692857	-0.350313	-0.278584	-0.151039
R-HSA-163767	PP2A-mediated dephosphorylation of key metabolic factors	-0.155576	-0.120169	-0.268117	-0.146833	-0.113429	-0.132961
R-HSA-77350	Beta oxidation of hexanoyl-CoA to butanoyl-CoA	-0.206606	-0.257915	-0.117547	-0.283867	-0.1786	-0.0929293
R-HSA-77352	Beta oxidation of butanoyl-CoA to acetyl-CoA	-0.329272	0.0234933218140426	-0.493489	-0.271923	-0.297618	-0.337988
R-HSA-9022707	MECP2 regulates transcription factors	-0.339789	-0.389598	-0.359984	-0.425981	-0.448737	-0.435166
R-HSA-9033807	ABO blood group biosynthesis	-0.307585	-0.196996	-0.0636387	-0.323149	-0.352771	-0.391145
R-HSA-5657655	MGMT-mediated DNA damage reversal	-0.826896	0.959445224719101	-0.907479	-0.784586	-0.793715	-0.829529
R-HSA-73942	DNA Damage Reversal	-0.110119	-0.184403	-0.24422	-0.346442	-0.366498	-0.134361
R-HSA-1237112	Methionine salvage pathway	-0.169658	-0.284688	0.0172423030887246	-0.238294	-0.178098	-0.1759
R-HSA-209931	Serotonin and melatonin biosynthesis	0.319157211661618	0.459889036821756	0.140795689850908	0.352613009110229	0.332989400050662	0.311142879188298
R-HSA-8941333	RUNX2 regulates genes involved in differentiation of myeloid cells	-0.107291	0.159503850075904	-0.0789293	-0.00715002	-0.0347895	-0.117285
R-HSA-390450	Folding of actin by CCT/TriC	-0.24337	-0.156852	-0.0357733	-0.203578	-0.201526	-0.137928
R-HSA-8849472	PTK6 Down-Regulation	-0.193592	0.0565224453201921	-0.114704	-0.190617	-0.116953	-0.179225
R-HSA-2142696	Synthesis of Hepoxilins (HX) and Trioxilins (TrX)	0.210535742472842	0.940128171363357	0.00753179708774265	0.28397946161505	0.254505463119363	0.200988106240906
R-HSA-9037628	Rhesus blood group biosynthesis	-0.0266877	-0.0636467	-0.125977	0.00447721885699232	-0.0122026	-0.0334475
R-HSA-9026527	Activated NTRK2 signals through PLCG1	-0.126803	0.189010232548979	-0.0272549	-0.0591346	-0.0925362	-0.138492
R-HSA-9034793	Activated NTRK3 signals through PLCG1	-0.209072	0.250898682069038	-0.0533412	-0.153585	-0.179205	-0.217561
R-HSA-4755510	SUMOylation of immune response proteins	-0.244004	-0.221993	-0.209557	-0.28696	-0.300056	-0.226285
R-HSA-425986	Sodium/Proton exchangers	0.026378979116909	0.418238075140874	0.498241881066879	0.0286870813922481	0.208747828784207	0.0157860249624996
R-HSA-9031525	NR1H2 & NR1H3 regulate gene expression to limit cholesterol uptake	-0.0981751	-0.0189105	-0.151726	-0.0426571	-0.0808512	-0.111767
R-HSA-9632974	NR1H2 & NR1H3 regulate gene expression linked to gluconeogenesis	-0.201765	-0.104805	-0.215824	-0.229733	-0.262703	-0.281403
R-HSA-3134963	DEx/H-box helicases activate type I IFN and inflammatory cytokines production	-0.317577	-0.264396	-0.081348	-0.393547	-0.393221	-0.343278
R-HSA-8849175	Threonine catabolism	0.0636635054443274	0.0271338250790306	0.394950430310334	-0.218013	-0.23437	0.0574288724973657
R-HSA-380095	Tachykinin receptors bind tachykinins	-0.351803	-0.390983	-0.0694228	-0.361732	-0.24085	-0.35895
R-HSA-9025046	NTF3 activates NTRK2 (TRKB) signaling	0.00481911195168006	0.641418992771474	-0.188311	0.0734211832010434	0.0430539699847046	-0.00631162
R-HSA-9034013	NTF3 activates NTRK3 signaling	-0.0948362	0.524268341131613	-0.063762	-0.0270092	-0.0581061	-0.10532
R-HSA-9851151	MDK and PTN in ALK signaling	-0.02858	0.209995383144399	-0.0478646	-0.226785	-0.244813	-0.131429
R-HSA-5660489	MTF1 activates gene expression	-0.352441	-0.110158	-0.22649	-0.29276	-0.0227335	-0.362899
R-HSA-140179	Amine Oxidase reactions	-0.0451077	0.525214223776236	0.437006925810342	0.0409492865277684	0.0074696992654657	-0.0609669
R-HSA-141333	Biogenic amines are oxidatively deaminated to aldehydes by MAOA and MAOB	-0.158885	0.578557838549573	0.504990352312017	-0.0785351	-0.113099	-0.167398
R-HSA-379397	Enzymatic degradation of dopamine by COMT	0.0599339328276689	0.111902848218559	0.0706036526681185	0.125768468945548	0.190181396805977	0.0947474173831568
R-HSA-379398	Enzymatic degradation of Dopamine by monoamine oxidase	0.0259318948597432	0.0818896045062829	0.0441020187255658	0.0919883105330877	0.16045865333701	0.063186616303251
R-HSA-379401	Dopamine clearance from the synaptic cleft	0.0712901802892506	0.116869677288105	0.0695664617658673	0.136936801996617	0.236025269888969	0.103142031737364
R-HSA-351200	Interconversion of polyamines	-0.380777	-0.166639	0.0404009233970941	-0.363746	-0.398627	-0.206552
R-HSA-391903	Eicosanoid ligand-binding receptors	0.0735142574257278	-0.0273635	-0.13531	0.0264613280572198	0.0171039577173199	0.0678319413352624
R-HSA-391908	Prostanoid ligand receptors	0.158341197357943	0.0172035475678333	-0.0559971	0.102524727922171	0.0668986448119616	0.0730571626748231
R-HSA-9759218	Cobalamin (Cbl) metabolism	-0.296615	-0.0721962	-0.0319046	-0.306539	-0.173725	-0.36719
R-HSA-140180	COX reactions	0.852690720744447	0.812746905451672	0.75094372750417	0.878237204810816	0.861645158458432	0.847072250021947
R-HSA-9020958	Interleukin-21 signaling	-0.334254	-0.227847	-0.256296	-0.31342	-0.316139	-0.250516
R-HSA-2408508	Metabolism of ingested SeMet, Sec, MeSec into H2Se	-0.164577	0.295042454916751	0.064762113658835	-0.101537	-0.128012	-0.042948
R-HSA-9024909	BDNF activates NTRK2 (TRKB) signaling	0.184687375461212	0.549936207916916	-0.0591073	0.266203119534074	0.226548426577988	0.170094172097824
R-HSA-9028335	Activated NTRK2 signals through PI3K	-0.0650177	0.0503533400561605	-0.00609058	-0.0154374	-0.103553	-0.0659613
R-HSA-9032845	Activated NTRK2 signals through CDK5	-0.230395	-0.193443	0.0131481132324353	-0.240065	-0.225374	-0.178021
R-HSA-8964540	Alanine metabolism	0.674683988764045	0.634480337078652	0.573033707865169	0.700491573033708	0.683813202247191	0.668539325842697
R-HSA-74182	Ketone body metabolism	-0.152676	0.0407736380247228	-0.325639	-0.090532	0.103850418233693	-0.161571
R-HSA-77108	Utilization of Ketone Bodies	-0.217049	0.122606350633064	-0.402111	-0.149981	-0.177325	-0.226752
R-HSA-77111	Synthesis of Ketone Bodies	-0.125265	0.216734844211673	-0.28799	-0.0566843	0.232331018194929	-0.133146
R-HSA-390650	Histamine receptors	0.793794951254969	0.784387875559898	0.786574066071037	0.797129336969111	0.791906648534523	0.793894727007038
R-HSA-75157	FasL/ CD95L signaling	-0.289414	-0.248838	-0.102926	-0.343542	-0.27258	-0.290086
R-HSA-450513	Tristetraprolin (TTP, ZFP36) binds and destabilizes mRNA	-0.125294	-0.0982025	-0.150235	-0.122574	-0.086198	-0.146478
R-HSA-202670	ERKs are inactivated	-0.227462	-0.17484	-0.324067	-0.22069	-0.21576	-0.151618
R-HSA-77285	Beta oxidation of myristoyl-CoA to lauroyl-CoA	0.0296603439929851	-0.171332	0.181844999442202	-0.075172	0.0553693635529164	0.137255873603574
R-HSA-77310	Beta oxidation of lauroyl-CoA to decanoyl-CoA-CoA	-0.0738448	-0.116959	0.0327137399427355	-0.157351	-0.0462657	0.0415752568456744
R-HSA-8951671	RUNX3 regulates YAP1-mediated transcription	-0.136296	0.0236913603125531	-0.0632573	-0.120599	-0.170121	-0.0598203
R-HSA-111995	phospho-PLA2 pathway	-0.338978	-0.181485	-0.298675	-0.321368	-0.350471	-0.129882
R-HSA-9927353	Co-inhibition by BTLA	-0.100741	-0.084012	-0.0575155	-0.269057	-0.217569	-0.163066
R-HSA-163754	Insulin effects increased synthesis of Xylulose-5-Phosphate	-0.169687	-0.201181	0.320604428331946	0.0699666163895249	0.384758013744088	-0.177665
R-HSA-203754	NOSIP mediated eNOS trafficking	-0.0258452	0.136857616916123	-0.00184893	0.0319497294708572	0.0912239651426124	0.0398332956079782
R-HSA-888593	Reuptake of GABA	0.127926185969436	-0.464551	-0.585101	-0.379355	-0.399302	-0.447112
R-HSA-217271	FMO oxidises nucleophiles	-0.100098	0.674966922063651	-0.31652	-0.022802	-0.0575791	-0.11263
R-HSA-211163	AKT-mediated inactivation of FOXO1A	-0.187875	-0.236002	-0.0606697	-0.325072	-0.283071	-0.183668
R-HSA-450385	Butyrate Response Factor 1 (BRF1) binds and destabilizes mRNA	-0.112274	-0.0993863	-0.125686	-0.158573	-0.12741	-0.129382
R-HSA-109703	PKB-mediated events	0.19375781535397	0.309728795326014	0.258818364281178	-0.0120611	-0.0219682	0.0156261600694205
R-HSA-165160	PDE3B signalling	0.19375781535397	0.309728795326014	0.258818364281178	-0.0120611	-0.0219682	0.0156261600694205
R-HSA-165181	Inhibition of TSC complex formation by PKB	-0.275324	-0.115005	0.134435815521141	-0.394878	-0.363625	-0.393223
R-HSA-72200	mRNA Editing: C to U Conversion	0.249094627366152	0.134700243103967	0.203345557252285	0.144443577819707	0.117601960924893	0.244220748879052
R-HSA-75072	mRNA Editing	4.00631578804378e-05	0.0111861467035721	-0.0703077	-0.0748147	-0.0997912	0.0548332685014316
R-HSA-75094	Formation of the Editosome	0.249094627366152	0.134700243103967	0.203345557252285	0.144443577819707	0.117601960924893	0.244220748879052
R-HSA-8939245	RUNX1 regulates transcription of genes involved in BCR signaling	-0.117316	0.0172056312807264	-0.0143706	-0.144145	-0.121247	-0.180685
R-HSA-1614603	Cysteine formation from homocysteine	-0.20153	0.0566855844819772	-0.0826005	-0.141749	-0.166373	0.0865013700811166
R-HSA-5625970	RHO GTPases activate KTN1	-0.274256	-0.246428	-0.00893426	-0.337534	-0.309163	-0.274975
R-HSA-9026357	NTF4 activates NTRK2 (TRKB) signaling	0.0141639663963201	0.435709387706831	-0.18083	0.0859419290361673	0.052696369028658	0.00290411021427534
R-HSA-3134973	LRR FLII-interacting protein 1 (LRRFIP1) activates type I IFN production	-0.274056	-0.136202	-0.0383266	-0.267211	-0.201513	-0.207017
R-HSA-1483213	Synthesis of PE	-0.336276	-0.211167	0.123707304226475	-0.201967	-0.312784	-0.314468
R-HSA-9013695	NOTCH4 Intracellular Domain Regulates Transcription	-0.262557	-0.141952	-0.116331	-0.30158	-0.304442	-0.265557
R-HSA-112303	Electric Transmission Across Gap Junctions	0.241528861208595	0.20216288490118	0.517655399054988	0.594296756854484	0.277909816453611	0.232865221331096
R-HSA-112307	Transmission across Electrical Synapses	0.241528861208595	0.20216288490118	0.517655399054988	0.594296756854484	0.277909816453611	0.232865221331096
R-HSA-4641265	Repression of WNT target genes	-0.231957	-0.275603	-0.203479	-0.25213	-0.225888	-0.223921
R-HSA-2393930	Phosphate bond hydrolysis by NUDT proteins	-0.102317	-0.158189	0.197381296060275	-0.0310299	0.177216174121578	-0.113427
R-HSA-9645135	STAT5 Activation	-0.141622	-0.0505188	-0.0647489	-0.201373	-0.180621	-0.150274
R-HSA-9730628	Sensory perception of salty taste	-0.342493	0.828587724402523	0.787668278709983	-0.280282	-0.302702	-0.350565
R-HSA-451307	Activation of Na-permeable kainate receptors	0.556530898876404	0.516678370786517	0.455231741573034	0.583391853932584	0.566713483146067	0.550561797752809
R-HSA-77305	Beta oxidation of palmitoyl-CoA to myristoyl-CoA	-0.101582	-0.144166	0.0292899645630357	-0.195649	-0.075937	-0.00819918
R-HSA-3249367	STAT6-mediated induction of chemokines	-0.19033	-0.211076	-0.100332	-0.217074	-0.0639559	-0.226254
R-HSA-399710	Activation of AMPA receptors	0.223364017590229	0.158327252615948	0.00328897162376751	0.295088548080526	0.262059620870993	0.212143587519044
R-HSA-211736	Stimulation of the cell death response by PAK-2p34	-0.213719	-0.161561	0.118225655742884	-0.134217	-0.188915	-0.225963
R-HSA-9836573	Mitochondrial RNA degradation	-0.273045	-0.262403	-0.0652763	-0.311515	-0.197494	-0.332814
R-HSA-139910	Activation of BMF and translocation to mitochondria	-0.353133	-0.292144	-0.112489	-0.302797	-0.256843	-0.325727
R-HSA-9007892	Interleukin-38 signaling	-0.269214	-0.00573841	-0.120132	-0.23019	-0.094304	-0.102102
R-HSA-427975	Proton/oligopeptide cotransporters	-0.105967	-0.0442889	-0.0661866	-0.0310529	0.0613412446833607	0.00729308807548451
R-HSA-9793242	SUMOylation of nuclear envelope proteins	-0.2896	-0.21981	-0.230932	-0.307596	-0.293239	-0.220635
R-HSA-1912399	Pre-NOTCH Processing in the Endoplasmic Reticulum	-0.277185	-0.139846	-0.196103	-0.306896	-0.332258	-0.245325
R-HSA-8941856	RUNX3 regulates NOTCH signaling	-0.338978	-0.214662	-0.162979	-0.372499	-0.368731	-0.334821
R-HSA-1296067	Potassium transport channels	-0.00719803	-0.0444171	-0.106742	0.0237008426966292	0.0071980337078652	-0.0140449
R-HSA-1296053	Classical Kir channels	0.245346660303229	0.214602826662831	0.383062969280566	0.303462993509797	0.282152993086664	0.237743723720464
R-HSA-8847453	Synthesis of PIPs in the nucleus	-0.279654	-0.23376	-0.240956	-0.237237	-0.262263	-0.289064
R-HSA-2892245	POU5F1 (OCT4), SOX2, NANOG repress genes related to differentiation	-0.471042	-0.251742	-0.285662	-0.460168	-0.449597	-0.4876
R-HSA-1483101	Synthesis of PS	-0.136994	-0.190465	-0.32171	-0.0787501	0.500817238248077	-0.146931
R-HSA-1483196	PI and PC transport between ER and Golgi membranes	-0.24513	-0.329236	-0.494847	-0.159085	-0.198377	-0.260678
R-HSA-3296197	Hydroxycarboxylic acid-binding receptors	0.853028972783143	0.812993854258121	0.751185250219491	0.878577699736611	0.862071992976295	0.847497805092186
R-HSA-204626	Hypusine synthesis from eIF5A-lysine	-0.316206	-0.0321833	-0.0671201	-0.260909	-0.286076	-0.324387
R-HSA-6798163	Choline catabolism	-0.120271	0.0768609561810736	-0.314501	-0.0546453	-0.0849594	-0.130457
R-HSA-8877627	Vitamin E transport	-0.087232	-0.154492	-0.158926	-0.01555	-0.0482451	-0.098444
R-HSA-9017802	Noncanonical activation of NOTCH3	-0.387358	-0.37722	-0.0955175	-0.503128	-0.414434	-0.350233
R-HSA-9022927	MECP2 regulates transcription of genes involved in GABA signaling	-0.00998109	-0.208599	-0.0850119	-0.0599789	-0.0950909	-0.149469
R-HSA-916853	Degradation of GABA	0.283996137301378	0.245544728294267	0.268136804315753	0.312615222544114	0.296462119216926	0.27723641471337
R-HSA-428643	Organic anion transporters	0.144278292552227	0.415362016611564	0.388925891314295	0.173420725854479	0.019743177055254	0.167890767807289
R-HSA-68881	Mitotic Metaphase/Anaphase Transition	-0.168481	-0.135072	-0.206977	-0.163285	-0.15583	-0.135122
R-HSA-446199	Synthesis of dolichyl-phosphate	0.102738236740696	0.0656759247194352	0.235682543661515	0.050523344713693	0.135586054407645	0.0847525914605076
R-HSA-429593	Inositol transporters	0.00324361927922306	-0.0391053	0.169152675710651	0.0687102506512848	0.30309349451092	-0.00513909
R-HSA-426117	Cation-coupled Chloride cotransporters	-0.366416	0.133173983130206	0.0141424170494194	-0.309748	-0.0497547	-0.374
R-HSA-75064	mRNA Editing: A to I Conversion	-0.350569	-0.106419	-0.359886	-0.37531	-0.38991	-0.182217
R-HSA-75102	C6 deamination of adenosine	-0.350569	-0.106419	-0.359886	-0.37531	-0.38991	-0.182217
R-HSA-77042	Formation of editosomes by ADAR proteins	-0.350569	-0.106419	-0.359886	-0.37531	-0.38991	-0.182217
R-HSA-9759811	Regulation of CDH11 mRNA translation by microRNAs	-0.184131	-0.314008	-0.0443792	-0.453198	-0.348858	-0.234452
R-HSA-3065676	SUMO is conjugated to E1 (UBA2:SAE1)	-0.135985	-0.139395	-0.155842	-0.213519	-0.241734	-0.141799
R-HSA-3065678	SUMO is transferred from E1 to E2 (UBE2I, UBC9)	-0.222625	-0.199076	-0.155453	-0.272768	-0.258077	-0.181293
R-HSA-3065679	SUMO is proteolytically processed	-0.119967	-0.125298	-0.147834	-0.193524	-0.221984	-0.125635
R-HSA-3215018	Processing and activation of SUMO	-0.184155	-0.182444	-0.142418	-0.233672	-0.226691	-0.156193
R-HSA-111452	Activation and oligomerization of BAK protein	-0.577019	-0.549227	-0.125229	-0.554662	-0.411215	-0.549091
R-HSA-114294	Activation, translocation and oligomerization of BAX	-0.489264	-0.544227	-0.151945	-0.441869	-0.153338	-0.498757
R-HSA-8943723	Regulation of PTEN mRNA translation	-0.217903	-0.310262	-0.0492891	-0.428201	-0.352963	-0.283629
R-HSA-9729555	Sensory perception of sour taste	0.148577618345747	0.112286952234143	0.426026718672255	0.213459959847149	0.189295139652063	0.139237350262018
R-HSA-727802	Transport of nucleotide sugars	-0.039833	-0.195394	0.0310114480141119	-0.138842	0.0908789345578795	-0.122672
R-HSA-444411	Rhesus glycoproteins mediate ammonium transport	-0.211385	0.357706851349209	0.0292397689234433	-0.140203	-0.0552948	-0.220427
R-HSA-9026395	Biosynthesis of DHA-derived sulfido conjugates	-0.367642	0.521679882411332	0.500755418352979	-0.297499	-0.32392	-0.377757
R-HSA-9026762	Biosynthesis of maresin conjugates in tissue regeneration (MCTR)	-0.367642	0.521679882411332	0.500755418352979	-0.297499	-0.32392	-0.377757
R-HSA-888568	GABA synthesis	0.0691802742632383	-0.136713	0.0062148691419231	0.00689654533128331	-0.026991	-0.0803916
R-HSA-429958	mRNA decay by 3' to 5' exoribonuclease	-0.114713	-0.0629284	0.0145535074322112	-0.153046	-0.106905	-0.0909376
R-HSA-9603505	NTRK3 as a dependence receptor	-0.306794	-0.138475	-0.0947076	-0.272643	-0.152999	-0.316705
R-HSA-177135	Conjugation of benzoate with glycine	-0.126777	0.634572697361024	0.606930503277856	-0.0657459	0.665406948129857	-0.133787
R-HSA-177162	Conjugation of phenylacetate with glutamine	0.598670464022633	0.577503628734833	0.55393037585575	0.611416923945964	0.601903190316788	0.596735484190584
R-HSA-975574	Reactions specific to the hybrid N-glycan synthesis pathway	-0.206597	-0.280875	-0.414296	-0.120024	-0.159213	-0.221021
R-HSA-9667769	Acetylcholine inhibits contraction of outer hair cells	0.28628535626235	0.236161592588538	0.0963506372872012	0.348720456041372	0.321220071322984	0.276761300421872
R-HSA-196783	Coenzyme A biosynthesis	-0.0776011	-0.257435	0.155826964634876	-0.223556	-0.236005	-0.224522
R-HSA-198765	Signalling to ERK5	-0.238993	-0.162388	-0.277989	-0.428736	-0.331835	-0.347113
R-HSA-433137	Sodium-coupled sulphate, di- and tri-carboxylate transporters	0.195080846845971	0.139875060098165	0.0558168745099859	0.0733372838013792	0.0159409891074079	-0.0320392
R-HSA-391906	Leukotriene receptors	0.0152869521893242	-0.109727	-0.225957	0.00606279860737302	0.0197757297857684	0.065713847287406
R-HSA-435354	Zinc transporters	-0.0221623	-0.0405547	-0.0832248	-0.0184988	0.0668177895324729	-0.00150139
R-HSA-442380	Zinc influx into cells by the SLC39 gene family	0.0799016965773643	0.05421825858384	0.0645176835303283	0.142365752477045	0.223868358330407	0.070106908618924
R-HSA-8951911	RUNX3 regulates RUNX1-mediated transcription	-0.482202	-0.0375128	-0.378917	-0.434852	-0.446811	-0.487176
R-HSA-8932504	DAG1 core M2 glycosylations	0.316128699154735	0.256944654112905	0.132929359533851	0.362272996205882	0.336248000683198	0.307076136831307
R-HSA-8932505	DAG1 core M3 glycosylations	0.0331196737633393	0.164636076636376	0.109801122474841	0.0638288059217781	0.0377291307584741	0.0469008775293748
R-HSA-8932506	DAG1 core M1 glycosylations	0.316128699154735	0.256944654112905	0.132929359533851	0.362272996205882	0.336248000683198	0.307076136831307
R-HSA-9837092	FASTK family proteins regulate processing and stability of mitochondrial RNAs	-0.0420159	-0.19586	-0.100962	-0.125338	-0.0116482	-0.132198
R-HSA-1606341	IRF3 mediated activation of type 1 IFN	-0.188764	-0.167208	-0.144069	-0.210556	-0.0290298	-0.164403
R-HSA-71737	Pyrophosphate hydrolysis	0.247625236735847	0.19855432690667	0.0541734099352608	0.311918131428054	0.284299457642337	0.238132015019758
R-HSA-9026766	Biosynthesis of protectin and resolvin conjugates in tissue regeneration (PCTR and RCTR)	-0.0791853	-0.115442	-0.308704	-0.0470547	-0.063559	-0.0860328
R-HSA-5263617	Metabolism of ingested MeSeO2H into MeSeH	-0.580403	0.588522365100962	0.555458839100589	-0.51488	-0.532479	-0.586274
R-HSA-428559	Proton-coupled neutral amino acid transporters	-0.473044	0.514400419238876	0.536755735485435	-0.419994	-0.430781	-0.477993
R-HSA-373756	SDK interactions	-0.147801	0.627645560727145	0.619660012651842	-0.170408	0.22286935484615	-0.159644
R-HSA-9640463	Wax biosynthesis	0.26405748848654	0.190357797831241	0.0244032962021577	0.308722113138306	0.284170870708653	0.250910570639422
R-HSA-112122	ALKBH2 mediated reversal of alkylation damage	-0.263609	-0.310851	-0.449773	-0.19559	-0.223207	-0.274376
R-HSA-73943	Reversal of alkylation damage by DNA dioxygenases	-0.0197499	-0.382564	-0.18283	-0.286284	-0.31594	-0.0341949
R-HSA-5576894	Phase 1 - inactivation of fast Na+ channels	-0.81834	0.481328211926431	-0.0694567	-0.782246	-0.787143	-0.362703
R-HSA-141334	PAOs oxidise polyamines to amines	0.271442366780792	0.232990957773681	0.233598463040772	0.300061452023527	0.283908348696339	0.264507066982706
R-HSA-6814848	Glycerophospholipid catabolism	-0.246408	-0.106263	-0.0948751	-0.186422	-0.214683	-0.25618
R-HSA-9768778	Regulation of NPAS4 mRNA translation	-0.166887	-0.350427	-0.0246137	-0.439355	-0.334095	-0.218159
R-HSA-435368	Zinc efflux and compartmentalization by the SLC30 family	-0.104012	-0.115571	-0.182309	-0.128091	-0.0257148	-0.0627227
R-HSA-880009	Interconversion of 2-oxoglutarate and 2-hydroxyglutarate	0.629771580842355	0.628581193758978	0.529828838406674	0.615437982664112	0.618977176573844	0.633975426489528
R-HSA-6806664	Metabolism of vitamin K	-0.0492653	-0.137625	-0.0793316	-0.211303	-0.0606539	-0.189807
R-HSA-426048	Arachidonate production from DAG	0.0299516908212561	-0.00263505	-0.0673693	0.0844822262500914	0.0513655592480684	0.0245937637241985
R-HSA-112126	ALKBH3 mediated reversal of alkylation damage	-0.0116188	-0.465279	-0.141381	-0.406111	-0.426953	-0.0379052
R-HSA-426496	Post-transcriptional silencing by small RNAs	-0.183859	-0.326138	-0.0444339	-0.452485	-0.323754	-0.243151
R-HSA-8948700	Competing endogenous RNAs (ceRNAs) regulate PTEN translation	-0.18993	-0.362928	-0.000794571	-0.446025	-0.349068	-0.238741
R-HSA-1855191	Synthesis of IPs in the nucleus	-0.158888	0.0919914288585378	0.0213493144428877	-0.103941	0.0310508072331523	-0.130276
R-HSA-9636003	NEIL3-mediated resolution of ICLs	-0.224052	-0.262473	0.774119919234483	-0.155947	-0.188268	0.86937055570187
R-HSA-9014826	Interleukin-36 pathway	0.00292233084399374	0.0529015266877569	-0.0990463	-0.0207368	-0.0494535	-0.0113654
R-HSA-351143	Agmatine biosynthesis	0.186318054549564	-0.118624	0.173579261386855	0.00909932046546735	0.229237475294742	-0.0516505
R-HSA-1299361	TWIK-related alkaline pH activated K+ channel (TALK)	0.884416492538797	0.80276025482482	0.670845741582348	0.886053018423393	0.886683108281289	0.871149804146982
R-HSA-163316	Mitochondrial transcription termination	0.208077260755048	0.197850572984828	0.200474042136435	0.237050043898156	0.22071992976295	0.201141352063213
R-HSA-1483152	Hydrolysis of LPE	-0.0737091	-0.142822	-0.265837	0.0105343354858113	-0.0299524	-0.090253
R-HSA-1483076	Synthesis of CL	-0.144312	-0.180829	-0.243153	-0.111833	-0.129213	-0.151159
R-HSA-211994	Sterols are 12-hydroxylated by CYP8B1	-0.558242	-0.599373	0.805636908510255	-0.787971	-0.82018	0.823024137110344
R-HSA-1855231	Synthesis of IPs in the ER lumen	-0.227548	-0.263015	-0.325081	-0.193925	-0.211132	-0.234308
