# Supplementary material for: Identification of biomarkers associated with endoplasmic reticulum stress-related cell death in osteoporosis based on bulk and single-cell transcriptomic analyses and experimental validation
Source: Research Square preprint supplement (doi:10.21203/rs.3.rs-8454279/v1), 2026-01-12
Supplement: Supplementary file 7 [file 5e0acd4433fbd5a6fab3ec46.xlsx]

## Sheet: 02.DAPK3_result
Supplementary Table 10
ID	Description	setSize	enrichmentScore	NES	pvalue	p.adjust	qvalue	rank	leading_edge	core_enrichment
KEGG_NEUROACTIVE_LIGAND_RECEPTOR_INTERACTION	KEGG_NEUROACTIVE_LIGAND_RECEPTOR_INTERACTION	245	0.376709598079237	2.01115909010675	9.3598317102695e-09	1.71284920297932e-06	1.44831080148381e-06	2741	tags=31%, list=22%, signal=25%	ADORA1/ADRA2C/LTB4R/THRA/CHRNA2/HTR7/HTR4/CHRNA4/PRLR/GHSR/TSPO/NMUR1/HRH3/GALR2/GRIN2C/HTR5A/SSTR5/P2RX3/CCKBR/P2RX1/PTGDR/PTGIR/GABRD/HRH2/S1PR4/GRIK1/GCGR/P2RY6/SCTR/HRH1/GRIN1/ADRA2B/OPRD1/GABRB3/PTH1R/GRM1/GPR35/GABRA5/P2RY11/GRIK5/PRSS3/OPRL1/CHRNA10/GRIA3/S1PR2/SSTR1/CHRND/CYSLTR1/CHRNB2/CCKAR/CYSLTR2/THRB/HCRTR1/F2/VIPR2/PTGFR/DRD4/LPAR3/GRIN2B/SSTR3/ADCYAP1R1/BDKRB2/GRIA4/LTB4R2/GABRE/NP…
KEGG_PROTEASOME	KEGG_PROTEASOME	39	-0.598431	-2.40399	3.76911355165647e-07	3.44873889976567e-05	2.91610364259737e-05	3040	tags=67%, list=25%, signal=50%	PSMB7/PSMD1/PSMB9/PSMD13/PSMD4/PSMC3/PSMA1/PSMB1/PSMC6/PSMD6/PSMA2/PSMC5/PSMB4/PSMC2/PSMA3/PSMD12/PSMA4/PSMC1/PSMB3/PSMA5/PSMA7/PSMD11/PSMD7/PSMD2/PSMD14/PSME4
KEGG_HYPERTROPHIC_CARDIOMYOPATHY_HCM	KEGG_HYPERTROPHIC_CARDIOMYOPATHY_HCM	76	0.487627390874941	2.19057864522571	8.61774420425515e-07	5.25682396459564e-05	4.44494174745792e-05	3713	tags=59%, list=30%, signal=42%	TNNC1/CACNB1/IGF1/LAMA2/CACNA1C/CACNA1D/ITGB7/SGCA/MYBPC3/TPM2/TNNT2/CACNA1S/LMNA/ITGB4/ITGA6/DES/ITGA5/MYL3/EMD/CACNG5/ACTB/CACNA2D2/MYL2/TGFB1/CACNB4/MYH6/CACNG3/TPM4/CACNG4/PRKAA2/SLC8A1/ACE/MYH7/CACNA1F/ITGA2B/TGFB2/ACTC1/TNF/ITGA2/DMD/ITGB3/ATP2A2/ITGB8/ITGA8/CACNB3
KEGG_DILATED_CARDIOMYOPATHY	KEGG_DILATED_CARDIOMYOPATHY	82	0.459844217095175	2.08664558910514	4.72365449514589e-06	0.000216107193152924	0.000182730844943802	3713	tags=57%, list=30%, signal=40%	TNNC1/CACNB1/IGF1/LAMA2/CACNA1C/CACNA1D/ITGB7/SGCA/MYBPC3/TPM2/TNNT2/ADCY9/CACNA1S/LMNA/ITGB4/ITGA6/DES/ITGA5/MYL3/EMD/CACNG5/ACTB/CACNA2D2/MYL2/TGFB1/CACNB4/MYH6/CACNG3/TPM4/CACNG4/SLC8A1/MYH7/CACNA1F/ITGA2B/TGFB2/ACTC1/TNF/GNAS/ITGA2/DMD/ITGB3/ATP2A2/ITGB8/ADCY3/ADRB1/ITGA8/CACNB3
KEGG_SPLICEOSOME	KEGG_SPLICEOSOME	104	-0.39951	-1.94135	7.98439874945375e-06	0.000292228994230007	0.000247096129719937	3509	tags=48%, list=29%, signal=35%	HNRNPC/SRSF7/LSM7/PRPF4/LSM6/SYF2/CTNNBL1/EIF4A3/PPIE/HSPA8/SNRPD2/SNRNP40/SRSF8/SNW1/SNRPA1/SNRPD3/SRSF4/HNRNPA3/PRPF40A/MAGOH/TRA2A/THOC2/NCBP1/PRPF18/CDC40/SF3B1/RBM8A/NCBP2/LSM3/TRA2B/RBM22/SRSF6/SNRPB2/SMNDC1/DDX42/SNRNP27/DHX15/SRSF3/SRSF5/AQR/HNRNPA1/RBM25/CRNKL1/PPIH/TCERG1/CDC5L/U2SURP/DDX46/THOC1/SRSF1
KEGG_CALCIUM_SIGNALING_PATHWAY	KEGG_CALCIUM_SIGNALING_PATHWAY	164	0.355101444890852	1.81283263146552	1.17377459947445e-05	0.000358001252839707	0.000302710291443411	3564	tags=43%, list=29%, signal=31%	PLCB3/CACNA1A/HTR7/TNNC1/HTR4/CACNA1C/CACNA1D/PRKCG/ADCY9/GRIN2C/HTR5A/P2RX3/CCKBR/CACNA1S/CACNA1I/CACNA1G/NOS2/P2RX1/PPP3CC/PLCG1/CALML5/PTK2B/HRH2/PDGFRA/HRH1/GRIN1/ITPKA/GNAL/GRM1/ATP2A3/CACNA1B/GNA11/SLC25A6/CYSLTR1/NOS3/CCKAR/CYSLTR2/ITPKB/ITPR3/PTGFR/SPHK1/TNNC2/BDKRB2/LTB4R2/SLC25A4/CACNA1E/CACNA1H/AVPR1A/P2RX4/HTR6/EDNRA/SLC8A1/ADRA1D/PLCD1/CACNA1F/PTGER1/PDE1B/PLCB2/GNAS/ADRA1A/PHKG2/ERB…
KEGG_RIBOSOME	KEGG_RIBOSOME	82	-0.409874	-1.91541	8.62930451302618e-05	0.00225594675126256	0.00190753047130052	3591	tags=49%, list=29%, signal=35%	RPL29/RSL24D1/RPL10/RPS19/RPL10L/RPS29/RPS25/RPL4/RPL18A/RPS23/RPL12/RPS3/RPL7A/RPS24/RPS3A/RPS11/RPS2/RPL9/RPL14/RPL36AL/RPL18/RPL11/RPL41/RPL17/RPL13/RPLP0/RPL13A/RPS4X/RPL3/RPL15/RPL23/RPL7/RPL23A/MRPL13/RPL6/RPSA/RPL31/RPS21/RPS15A/RPL22
KEGG_MAPK_SIGNALING_PATHWAY	KEGG_MAPK_SIGNALING_PATHWAY	245	0.299831985499049	1.60072858832317	0.000226154602597819	0.00517328653442512	0.00437430612919466	2763	tags=33%, list=22%, signal=26%	CACNA1A/NFATC4/HRAS/MAPK11/HSPB1/CACNB1/PLA2G1B/FGF8/FGF22/ECSIT/RAC3/RPS6KA2/CACNA1C/CACNA1D/PRKCG/MAP3K6/MAP4K2/CACNA1S/CACNA1I/CACNA1G/DAXX/MAPK8IP1/PPP3CC/NFKB2/PDGFRA/RELB/FGF6/NR4A1/AKT1/MAPK3/FGF17/MAPK12/TAB1/PLA2G2A/FLNA/DUSP9/MAP3K12/CACNA1B/NGF/NTRK1/CACNG5/AKT2/ELK1/MAPKAPK2/FGF21/CACNA2D2/MAPK8IP2/PPP5C/FGF12/RPS6KA1/DUSP4/MAPK8IP3/RASGRP2/MAP3K13/DUSP8/TGFB1/MAP2K2/CACNB4/FGF20/PLA2…
KEGG_FOCAL_ADHESION	KEGG_FOCAL_ADHESION	189	0.310428235521932	1.6201767726586	0.000287605421584105	0.00584797690554347	0.00494479496758637	3921	tags=46%, list=32%, signal=32%	TNXB/BCL2/SHC3/FLT4/COL6A1/HRAS/VEGFA/RAC3/IGF1/LAMA2/PRKCG/ITGB7/CCND1/RAPGEF1/IBSP/ACTN4/PPP1CA/PARVA/COMP/COL6A2/LAMC3/PDGFRA/ITGB4/AKT1/MAPK3/COL11A2/ITGA6/ILK/BAD/ITGA5/LAMA5/MYL5/FLNA/LAMC1/SHC2/PIP5K1C/CCND3/AKT2/ACTB/ELK1/VASP/ZYX/THBS4/PARVB/HGF/CAV3/MYL2/PAK4/LAMB1/PAK6/VEGFB/MYL9/ARHGAP35/LAMA4/JUN/PXN/THBS2/RAC2/ITGA2B/CHAD/COL1A2/LAMB3/COL4A2/COL1A1/TLN1/ACTN2/FLT1/ITGA2/MET/PDGFA/PA…
KEGG_AXON_GUIDANCE	KEGG_AXON_GUIDANCE	112	0.348830152326864	1.66336072408376	0.00106429962928906	0.0194766832159897	0.0164686363689991	3374	tags=43%, list=27%, signal=31%	NFATC4/EFNA3/EPHB3/HRAS/SEMA6B/EPHA1/RAC3/NTN3/PLXNA1/PPP3CC/EPHB2/UNC5B/MAPK3/EFNB1/SEMA3B/PLXNA2/UNC5C/SEMA4C/RND1/SEMA3D/SLIT3/LIMK2/SEMA3F/SEMA6C/EFNA4/EFNA2/PLXNB3/PAK4/FES/NRP1/PAK6/L1CAM/EFNB3/PLXNB2/GNAI2/CFL1/CDK5/EPHB6/RHOD/RAC2/EFNA1/ABLIM1/ABL1/EPHB4/LIMK1/MET/CHP2/PAK3
KEGG_RNA_DEGRADATION	KEGG_RNA_DEGRADATION	44	-0.442411	-1.82544	0.00125816972469342	0.0209313690562633	0.0176986554574099	2005	tags=39%, list=16%, signal=32%	DCP2/MPHOSPH6/TTC37/EXOSC2/HSPD1/PARN/LSM1/LSM3/EXOSC8/DCP1A/HSPA9/CNOT2/PAPOLG/CNOT1/CNOT7/DIS3/PAPOLA
KEGG_ARRHYTHMOGENIC_RIGHT_VENTRICULAR_CARDIOMYOPATHY_ARVC	KEGG_ARRHYTHMOGENIC_RIGHT_VENTRICULAR_CARDIOMYOPATHY_ARVC	68	0.38945236803907	1.70466721727338	0.00174587688099917	0.0245765745556037	0.0207808827131076	3713	tags=51%, list=30%, signal=36%	CACNB1/LAMA2/CACNA1C/CACNA1D/ITGB7/SGCA/CACNA1S/ACTN4/LMNA/ITGB4/ITGA6/DES/ITGA5/EMD/CACNG5/ACTB/CACNA2D2/CACNB4/CACNG3/CACNG4/SLC8A1/CACNA1F/ITGA2B/PKP2/LEF1/ACTN2/ITGA2/DMD/ITGB3/CTNNA2/ATP2A2/ITGB8/ACTN1/ITGA8/CACNB3
KEGG_ECM_RECEPTOR_INTERACTION	KEGG_ECM_RECEPTOR_INTERACTION	81	0.375565592322598	1.69749856732519	0.00163231132722947	0.0245765745556037	0.0207808827131076	3921	tags=51%, list=32%, signal=35%	TNXB/COL6A1/LAMA2/ITGB7/IBSP/COMP/COL6A2/LAMC3/ITGB4/COL11A2/ITGA6/ITGA5/LAMA5/LAMC1/THBS4/GP9/LAMB1/HSPG2/GP1BB/AGRN/LAMA4/THBS2/ITGA2B/CHAD/COL1A2/LAMB3/COL4A2/COL1A1/SV2A/ITGA2/SDC3/COL3A1/ITGB3/LAMB2/ITGB8/ITGA8/SV2B/COL2A1/TNC/LAMB4/THBS3
KEGG_CYTOKINE_CYTOKINE_RECEPTOR_INTERACTION	KEGG_CYTOKINE_CYTOKINE_RECEPTOR_INTERACTION	236	0.272363236663936	1.44673531472693	0.00325655834518644	0.0425678697977942	0.0359935396046922	3053	tags=29%, list=25%, signal=22%	CCL24/CNTFR/FLT3LG/FLT4/IL13/CXCR5/VEGFA/PRLR/CD70/TNFRSF25/CCL27/INHBA/CLCF1/TPO/BMPR2/AMHR2/IL17RA/TNFRSF10C/OSM/PDGFRA/IL12RB1/CRLF2/CXCR6/TNFRSF4/CCL19/CSF3R/TNFRSF8/TNFRSF14/IL22RA1/ACVRL1/GDF5/CSF1/TNFRSF11A/LTBR/CXCL2/CCL21/CCL7/IL4R/CXCL1/HGF/CXCL14/CXCL3/TGFB1/IL24/IL5/IL17B/IFNB1/TNFSF13/TNFRSF11B/IL11/XCL1/VEGFB/LTA/AMH/CCR10/IFNGR2/CD27/INHBE/ACVR2B/CCL1/EPO/CSF3/CCL17/BMP7/TGFB2/CCR8…
KEGG_VEGF_SIGNALING_PATHWAY	KEGG_VEGF_SIGNALING_PATHWAY	69	0.373835204146761	1.64353869888701	0.00394068091256619	0.0450715379374758	0.0381105325096862	2092	tags=33%, list=17%, signal=28%	NFATC4/HRAS/MAPK11/HSPB1/VEGFA/PLA2G1B/RAC3/PRKCG/PPP3CC/PLCG1/AKT1/MAPK3/MAPK12/BAD/PLA2G2A/SHC2/AKT2/MAPKAPK2/NOS3/MAP2K2/SPHK1/PLA2G3/MAPKAPK3
KEGG_TIGHT_JUNCTION	KEGG_TIGHT_JUNCTION	115	0.321439003263703	1.5440366313699	0.0038648566827569	0.0450715379374758	0.0381105325096862	3151	tags=37%, list=26%, signal=27%	PARD6A/LLGL2/MYH13/HRAS/CLDN5/PRKCG/LLGL1/PPP2R1A/ACTN4/MYH14/MAGI2/TJP3/CLDN15/AKT1/CLDN4/CLDN9/MYL5/PRKCD/EXOC3/AKT2/CSNK2B/CLDN18/ACTB/MYH9/CLDN14/MYL2/MYH6/HCLS1/MRAS/MYH15/SPTAN1/CSNK2A2/MYL9/GNAI2/RRAS/RAB3B/MYH7/MYH3/PPP2R2B/SYMPK/ACTN2/MYH10
KEGG_GLYCEROPHOSPHOLIPID_METABOLISM	KEGG_GLYCEROPHOSPHOLIPID_METABOLISM	58	0.378543113415293	1.61752489334992	0.00660343094318017	0.071083991917763	0.0601055324239929	3542	tags=48%, list=29%, signal=35%	AGPAT2/PCYT1B/PLA2G1B/LPCAT3/PCYT2/PLD2/LYPLA2/ETNK2/PLA2G2A/ACHE/DGKZ/MBOAT7/DGKQ/CDIPT/PLA2G3/PTDSS2/DGKA/DGKB/PLA2G6/GPD2/DGKG/AGPAT3/LCAT/LPCAT1/AGPAT1/CHKB/PTDSS1/PCYT1A
KEGG_VASCULAR_SMOOTH_MUSCLE_CONTRACTION	KEGG_VASCULAR_SMOOTH_MUSCLE_CONTRACTION	99	0.327423763261977	1.53877322846339	0.00730954950538346	0.0743137533047318	0.0628364782041736	3121	tags=35%, list=25%, signal=27%	PLCB3/RAMP1/NPR1/PLA2G1B/CACNA1C/CACNA1D/PRKCG/ADCY9/CACNA1S/PPP1CA/CALML5/PTGIR/ARHGEF1/MAPK3/CALD1/PLA2G2A/PRKCD/GNA11/ITPR3/ARHGEF11/MAP2K2/PLA2G3/ACTG2/GUCY1A2/AVPR1A/MYL9/EDNRA/GNA12/ADRA1D/PLA2G6/CACNA1F/PLCB2/KCNMB2/GNAS/ADRA1A
KEGG_CARDIAC_MUSCLE_CONTRACTION	KEGG_CARDIAC_MUSCLE_CONTRACTION	63	0.369261908947856	1.59859090072529	0.00789687078380096	0.0760593343913461	0.0643124656630882	3267	tags=46%, list=27%, signal=34%	TNNC1/CACNB1/COX6A2/CACNA1C/CACNA1D/TPM2/TNNT2/CACNA1S/COX8A/MYL3/CACNG5/SLC9A1/CACNA2D2/MYL2/UQCRC1/COX5A/CACNB4/MYH6/CACNG3/TPM4/CYC1/CACNG4/SLC8A1/MYH7/CACNA1F/ACTC1/COX7A1/ATP1B4/COX4I1
KEGG_TYROSINE_METABOLISM	KEGG_TYROSINE_METABOLISM	38	0.420785528621197	1.62016530712222	0.00970604593761459	0.0845812574563557	0.0715182332245286	728	tags=18%, list=6%, signal=17%	DBH/ALDH3B1/IL4I1/PNMT/TPO/ADH7/ALDH3A1
KEGG_UBIQUITIN_MEDIATED_PROTEOLYSIS	KEGG_UBIQUITIN_MEDIATED_PROTEOLYSIS	112	-0.298334	-1.48392	0.00957041471556827	0.0845812574563557	0.0715182332245286	3909	tags=50%, list=32%, signal=34%	CDC16/UBE2D1/UBE3C/UBE2Z/ANAPC5/SKP1/WWP1/UBE2W/ANAPC13/UBA6/MDM2/PIAS3/TRAF6/UBE3B/BIRC3/DDB2/CUL3/UBE2L6/ERCC8/CUL4A/ANAPC10/SAE1/UBE2D3/UBA2/RBX1/SKP2/KLHL9/RCHY1/TRIM37/SIAH1/UBE2G2/HERC1/UBR5/UBE2K/FANCL/ANAPC1/PIAS2/UBE2N/TRIP12/PIAS1/DET1/CDC27/CBLB/UBE3A/CUL1/CUL5/MAP3K1/BIRC2/CUL4B/UBE2B/SMURF2/ITCH/UBE2G1/CDC23/CUL2/UBE4A
KEGG_CITRATE_CYCLE_TCA_CYCLE	KEGG_CITRATE_CYCLE_TCA_CYCLE	30	-0.439596	-1.66317	0.0133703457502145	0.100752947993577	0.0851923115044917	1465	tags=30%, list=12%, signal=26%	SDHD/IDH3A/DLD/SUCLG2/MDH1/SDHB/ACO1/SUCLA2/FH
KEGG_NUCLEOTIDE_EXCISION_REPAIR	KEGG_NUCLEOTIDE_EXCISION_REPAIR	43	-0.385451	-1.57374	0.0142588534751804	0.100752947993577	0.0851923115044917	3114	tags=47%, list=25%, signal=35%	XPA/DDB2/ERCC8/CUL4A/CDK7/RBX1/CETN2/RPA2/PCNA/RFC1/RFC4/POLD3/GTF2H5/RPA1/POLE3/CCNH/RFC3/GTF2H1/CUL4B/ERCC5
KEGG_GLYCOLYSIS_GLUCONEOGENESIS	KEGG_GLYCOLYSIS_GLUCONEOGENESIS	54	0.375770777039312	1.56932550747977	0.0122409121871418	0.100752947993577	0.0851923115044917	1626	tags=26%, list=13%, signal=23%	PKLR/ALDH3B1/HK3/TPI1/ADH7/ALDH3A1/ALDH7A1/PGAM2/ALDOA/FBP2/LDHC/PFKL/PKM/GPI
KEGG_LONG_TERM_DEPRESSION	KEGG_LONG_TERM_DEPRESSION	63	0.3534776469865	1.53025843280846	0.0132529015161507	0.100752947993577	0.0851923115044917	2728	tags=33%, list=22%, signal=26%	PLCB3/CACNA1A/HRAS/PLA2G1B/CRH/IGF1/PRKCG/PPP2R1A/MAPK3/PLA2G2A/GRM1/GRIA3/GNA11/ITPR3/MAP2K2/PLA2G3/GUCY1A2/GNAZ/GNAI2/GNA12/PLA2G6
KEGG_PARKINSONS_DISEASE	KEGG_PARKINSONS_DISEASE	87	-0.316477	-1.49448	0.0143146264908908	0.100752947993577	0.0851923115044917	4266	tags=52%, list=35%, signal=34%	NDUFS4/NDUFB8/NDUFA2/NDUFAB1/UQCR10/NDUFA1/NDUFA4/GPR37/SNCA/NDUFS1/NDUFS5/NDUFB7/VDAC3/NDUFV2/COX6C/VDAC1/UBE2L6/NDUFS2/COX7A2L/NDUFS3/SLC25A5/COX7C/NDUFB6/NDUFA6/UBB/NDUFC2/COX6B1/COX7A2/SDHD/UBE2G2/NDUFA5/UQCRC2/APAF1/COX5B/PARK7/CASP3/NDUFB5/CYCS/SDHB/UQCRB/VDAC2/PPID/NDUFS6/UBE2G1/NDUFA8
KEGG_GNRH_SIGNALING_PATHWAY	KEGG_GNRH_SIGNALING_PATHWAY	88	0.319174103484076	1.46434579545625	0.0165471543531803	0.112152935060444	0.0948316448310916	2057	tags=25%, list=17%, signal=21%	PLCB3/HRAS/MAPK11/PLA2G1B/CACNA1C/CACNA1D/ADCY9/CACNA1S/PLD2/CALML5/PTK2B/GNRH2/MAPK3/MAPK12/PLA2G2A/PRKCD/MMP2/GNA11/ELK1/ITPR3/MAP2K2/PLA2G3
KEGG_ALLOGRAFT_REJECTION	KEGG_ALLOGRAFT_REJECTION	33	-0.420641	-1.60556	0.019340370579465	0.122044407449727	0.10319544374524	3180	tags=39%, list=26%, signal=29%	HLA-DQA1/FASLG/FAS/HLA-DMA/IL12A/HLA-DPB1/HLA-DMB/HLA-DOB/HLA-DRA/HLA-DQB1/HLA-DRB1/CD86/IL4
KEGG_BLADDER_CANCER	KEGG_BLADDER_CANCER	41	0.390624914261768	1.53974205577356	0.0187715525534452	0.122044407449727	0.10319544374524	2320	tags=29%, list=19%, signal=24%	DAPK3/HRAS/VEGFA/E2F1/CCND1/MAPK3/TYMP/MMP2/MMP9/E2F2/MAP2K2/VEGFB
KEGG_PROTEIN_EXPORT	KEGG_PROTEIN_EXPORT	18	-0.49841	-1.61458	0.0247747447258272	0.151125942827546	0.127785525427951	2001	tags=39%, list=16%, signal=33%	SEC11A/HSPA5/SEC63/SEC62/SPCS2/SRPRB/SRP72
KEGG_GLYCOSYLPHOSPHATIDYLINOSITOL_GPI_ANCHOR_BIOSYNTHESIS	KEGG_GLYCOSYLPHOSPHATIDYLINOSITOL_GPI_ANCHOR_BIOSYNTHESIS	19	-0.487394	-1.6077	0.0268902133372665	0.153778407522493	0.130028334229545	3260	tags=53%, list=26%, signal=39%	PIGL/PIGH/PIGG/PIGB/PIGC/PGAP1/PIGN/PIGK/PIGF/PIGA
KEGG_MELANOMA	KEGG_MELANOMA	68	0.325499907844798	1.42474168258972	0.0265250952391625	0.153778407522493	0.130028334229545	2052	tags=28%, list=17%, signal=23%	HRAS/E2F1/FGF8/FGF22/IGF1/CCND1/PDGFRA/FGF6/AKT1/MAPK3/FGF17/BAD/AKT2/FGF21/FGF12/E2F2/HGF/MAP2K2/FGF20
KEGG_CELL_CYCLE	KEGG_CELL_CYCLE	115	-0.277844	-1.38542	0.0290258001529115	0.160961255393418	0.136101838037575	2640	tags=33%, list=21%, signal=26%	E2F5/STAG2/ANAPC10/RB1/CDK7/RBL2/CDK1/SMAD2/YWHAZ/RBX1/CDKN1B/SKP2/MCM6/CDK2/RAD21/PCNA/GSK3B/TFDP2/PTTG1/SMAD4/E2F3/HDAC2/ANAPC1/ORC4/BUB3/CCNH/CDC27/STAG1/ATM/YWHAQ/ORC3/CUL1/SMC3/ORC5/ATR/DBF4/CDC23/CCNA1
KEGG_MISMATCH_REPAIR	KEGG_MISMATCH_REPAIR	23	-0.441349	-1.55488	0.0318486748725525	0.171420808872856	0.144945981618118	1904	tags=43%, list=15%, signal=37%	RPA2/MSH2/PCNA/RFC1/RFC4/POLD3/RPA1/MSH6/RFC3/MLH1
KEGG_MATURITY_ONSET_DIABETES_OF_THE_YOUNG	KEGG_MATURITY_ONSET_DIABETES_OF_THE_YOUNG	22	0.446944964479873	1.50068340680215	0.0403707986338332	0.211081604285471	0.178481425539052	2951	tags=36%, list=24%, signal=28%	PKLR/NKX6-1/ONECUT1/HNF1A/MNX1/NEUROG3/HNF1B/PAX4
KEGG_PHENYLALANINE_METABOLISM	KEGG_PHENYLALANINE_METABOLISM	16	0.508969831295298	1.55744950079917	0.0480311762961257	0.244158479505305	0.206449792851768	1923	tags=31%, list=16%, signal=26%	ALDH3B1/IL4I1/ALDH3A1/TAT/MIF
