# Supplementary material for: Identification of biomarkers associated with endoplasmic reticulum stress-related cell death in osteoporosis based on bulk and single-cell transcriptomic analyses and experimental validation
Source: Research Square preprint supplement (doi:10.21203/rs.3.rs-8454279/v1), 2026-01-12
Supplement: Supplementary file 8 [file 7aae9cee849e7b4dc98f7306.xlsx]

## Sheet: 01.CAMKK2_result
Supplementary Table 9
ID	Description	setSize	enrichmentScore	NES	pvalue	p.adjust	qvalue	rank	leading_edge	core_enrichment
KEGG_AUTOIMMUNE_THYROID_DISEASE	KEGG_AUTOIMMUNE_THYROID_DISEASE	46	-0.51986	-1.90655	0.000205893527181074	0.0376785154741366	0.0342433445206418	4445	tags=72%, list=36%, signal=46%	HLA-C/CD28/HLA-F/CD86/HLA-DQB1/HLA-DRB1/CD80/FASLG/HLA-B/IFNA14/PRF1/CD40LG/TG/IFNA17/HLA-DOB/CD40/IL2/HLA-DPB1/HLA-G/IL4/HLA-DRA/IFNA21/IFNA4/HLA-E/HLA-A/HLA-DQA1/HLA-DMB/IFNA7/HLA-DMA/IL10/GZMB/IFNA8/IFNA10
KEGG_ALLOGRAFT_REJECTION	KEGG_ALLOGRAFT_REJECTION	33	-0.535344	-1.82399	0.0017249924239627	0.0859715675097982	0.0781334924736734	4445	tags=79%, list=36%, signal=50%	HLA-C/CD28/HLA-F/CD86/HLA-DQB1/HLA-DRB1/CD80/FASLG/HLA-B/PRF1/CD40LG/HLA-DOB/CD40/IL2/HLA-DPB1/HLA-G/IL4/HLA-DRA/HLA-E/HLA-A/IL12A/HLA-DQA1/HLA-DMB/HLA-DMA/IL10/GZMB
KEGG_ANTIGEN_PROCESSING_AND_PRESENTATION	KEGG_ANTIGEN_PROCESSING_AND_PRESENTATION	72	-0.430367	-1.70195	0.00150496802729163	0.0859715675097982	0.0781334924736734	2997	tags=43%, list=24%, signal=33%	CALR/TAP2/TAPBP/PDIA3/IFNA17/HLA-DOB/IFI30/KIR2DL4/HSPA2/NFYA/CTSS/HLA-DPB1/KLRC3/HLA-G/HLA-DRA/CD8A/IFNA21/CD74/IFNA4/HLA-E/HLA-A/HLA-DQA1/HLA-DMB/IFNA7/CTSB/HLA-DMA/TAP1/IFNA8/IFNA10/LGMN/HSPA6
KEGG_LONG_TERM_POTENTIATION	KEGG_LONG_TERM_POTENTIATION	65	0.37060728181295	1.62341738471141	0.00286500944996567	0.0859715675097982	0.0781334924736734	1887	tags=32%, list=15%, signal=27%	RAP1A/PPP3CA/CREBBP/PLCB3/GRIN1/RAPGEF3/ITPR1/GRIN2C/RPS6KA2/BRAF/HRAS/EP300/PLCB1/PPP1CB/PRKCA/GRIN2B/MAPK3/CHP1/PPP3R1/KRAS/MAPK1
KEGG_JAK_STAT_SIGNALING_PATHWAY	KEGG_JAK_STAT_SIGNALING_PATHWAY	139	-0.357747	-1.56696	0.00298889184892434	0.0859715675097982	0.0781334924736734	3020	tags=36%, list=25%, signal=27%	IL7R/CBL/CSF3/PIK3CG/PIK3R2/JAK2/IFNA17/IL4R/IL9/SOCS7/EPOR/STAT1/LEP/IL2RA/IFNGR2/IL2/PRL/IL5RA/CSH1/CBLC/IL4/SOS1/IFNAR1/STAT4/IL2RB/IL19/IL26/IL23A/LEPR/IFNA21/IFNAR2/IL10RB/PIK3CD/IFNA4/IL12A/IFNA7/IL13RA2/GH1/SPRY2/IRF9/IL10/PIAS2/MYC/IFNA8/IFNA10/PIAS1/CISH/IL10RA/IFNW1/IL15RA
KEGG_MELANOGENESIS	KEGG_MELANOGENESIS	87	0.322454772505856	1.52341776359009	0.00328852990474638	0.0859715675097982	0.0781334924736734	1887	tags=31%, list=15%, signal=26%	DVL1/CREBBP/CTNNB1/MITF/PLCB3/WNT2B/FZD4/WNT5B/ADCY7/ADCY2/TYRP1/CREB3L2/HRAS/EP300/PLCB1/TCF7L2/FZD6/CREB1/ADCY9/PRKCA/MAPK3/WNT8B/KRAS/WNT16/MC1R/WNT7B/MAPK1
KEGG_CYTOKINE_CYTOKINE_RECEPTOR_INTERACTION	KEGG_CYTOKINE_CYTOKINE_RECEPTOR_INTERACTION	236	-0.314897	-1.45766	0.00327277988398238	0.0859715675097982	0.0781334924736734	2295	tags=26%, list=19%, signal=22%	CD40/TNFRSF13B/CCL7/EPOR/CSF1/CXCR2/NGFR/LEP/CXCR4/CXCL3/IL2RA/IFNGR2/IL2/TGFB2/PRL/IL5RA/CCL15/IL4/CCL18/IFNAR1/IL2RB/TNFSF14/IL1RAP/CCL14/IL17B/IL19/IL26/IL23A/BMP2/LEPR/CCR6/IFNA21/IFNAR2/CCL13/IL10RB/TNFRSF12A/IFNA4/AMH/TNFRSF11A/CCR5/IL12A/PDGFRB/EGFR/BMP7/VEGFB/CXCL11/EDA2R/IFNA7/IL1R2/IL18R1/TNFSF11/GH1/CCR2/CCL23/IL10/IFNA8/IFNA10/IL10RA/TNFRSF1A/IFNW1/TNFRSF21/IL15RA
KEGG_GLYCOSPHINGOLIPID_BIOSYNTHESIS_GANGLIO_SERIES	KEGG_GLYCOSPHINGOLIPID_BIOSYNTHESIS_GANGLIO_SERIES	13	-0.679614	-1.83718	0.00437305312473529	0.10003359022832	0.0909134728563388	2204	tags=54%, list=18%, signal=44%	HEXA/B3GALT4/ST3GAL1/SLC33A1/ST3GAL2/ST8SIA5/GLB1
KEGG_OTHER_GLYCAN_DEGRADATION	KEGG_OTHER_GLYCAN_DEGRADATION	14	-0.645505	-1.79103	0.00578299020480198	0.11758746749764	0.106866953492247	2204	tags=43%, list=18%, signal=35%	HEXA/NEU2/NEU1/GLB1/FUCA1/MANBA
KEGG_GRAFT_VERSUS_HOST_DISEASE	KEGG_GRAFT_VERSUS_HOST_DISEASE	34	-0.483551	-1.65436	0.0112974389419611	0.172285943864906	0.156578539721916	4445	tags=74%, list=36%, signal=47%	HLA-C/KLRC1/CD28/HLA-F/CD86/HLA-DQB1/HLA-DRB1/IL6/CD80/KIR2DL3/FASLG/HLA-B/PRF1/IL1B/HLA-DOB/IL2/HLA-DPB1/HLA-G/HLA-DRA/HLA-E/HLA-A/HLA-DQA1/HLA-DMB/HLA-DMA/GZMB
KEGG_INTESTINAL_IMMUNE_NETWORK_FOR_IGA_PRODUCTION	KEGG_INTESTINAL_IMMUNE_NETWORK_FOR_IGA_PRODUCTION	41	-0.462495	-1.65162	0.0099493663318074	0.172285943864906	0.156578539721916	4466	tags=63%, list=36%, signal=41%	IL15/CD28/CXCL12/TNFRSF17/CD86/TNFSF13/HLA-DQB1/HLA-DRB1/IL6/CD80/CD40LG/ICOSLG/HLA-DOB/CD40/TNFRSF13B/CXCR4/IL2/HLA-DPB1/IL4/MAP3K14/HLA-DRA/HLA-DQA1/HLA-DMB/HLA-DMA/IL10/IL15RA
KEGG_PATHOGENIC_ESCHERICHIA_COLI_INFECTION	KEGG_PATHOGENIC_ESCHERICHIA_COLI_INFECTION	51	0.363323946777826	1.50370873789339	0.0106912953809876	0.172285943864906	0.156578539721916	2346	tags=41%, list=19%, signal=33%	TUBA8/CTNNB1/EZR/ROCK1/TLR5/TUBB/ITGB1/ARPC3/TUBB2B/HCLS1/NCK1/NCK2/PRKCA/RHOA/LY96/TUBB1/TUBA4A/OCLN/NCL/CTTN/YWHAQ
KEGG_NOTCH_SIGNALING_PATHWAY	KEGG_NOTCH_SIGNALING_PATHWAY	39	0.398744757519937	1.57067374495666	0.012406756934459	0.174648963000462	0.15872612110482	1817	tags=36%, list=15%, signal=31%	DVL1/CIR1/SNW1/CREBBP/APH1A/CTBP1/ADAM17/EP300/DTX2/PSEN2/LFNG/NOTCH2/CTBP2/NOTCH4
KEGG_VEGF_SIGNALING_PATHWAY	KEGG_VEGF_SIGNALING_PATHWAY	69	0.336200640739742	1.50913194199107	0.0146229852861042	0.191143307668362	0.173716667308606	1890	tags=33%, list=15%, signal=28%	PLA2G12A/PPP3CA/PIK3R1/RAC3/AKT3/NFATC4/PLA2G1B/HSPB1/SRC/HRAS/PIK3CA/PLA2G3/PLCG1/RAC2/SH2D2A/PRKCA/MAPK11/MAPK3/CHP1/PPP3R1/KRAS/MAPK1/MAPKAPK3
KEGG_PURINE_METABOLISM	KEGG_PURINE_METABOLISM	130	-0.32035	-1.39367	0.0196424589239916	0.239637998872697	0.217790070876538	3411	tags=39%, list=28%, signal=29%	POLD2/APRT/PDE4D/GUCY2F/PDE1A/ENTPD4/ENTPD6/PDE6H/POLR2C/NME5/ADCY8/POLR1E/POLR2D/NME3/POLE2/ADCY6/ALLC/DGUOK/IMPDH2/POLR2F/POLD4/PDE6A/PDE4B/PAPSS2/PDE6G/AK4/POLR2G/PDE4A/NME1-NME2/NPR2/ENPP1/GUCY1A2/ATIC/POLA2/GUK1/ITPA/PDE2A/POLD3/ENTPD1/ADSL/PDE11A/PFAS/GUCY2D/AMPD1/NT5E/XDH/GUCY2C/POLR1C/PDE3B/POLR2H/PDE9A
KEGG_TYPE_I_DIABETES_MELLITUS	KEGG_TYPE_I_DIABETES_MELLITUS	39	-0.444453	-1.57683	0.0212049924677893	0.24253210135034	0.220420316441494	4445	tags=69%, list=36%, signal=44%	HLA-C/CD28/HLA-F/CD86/GAD2/HLA-DQB1/HLA-DRB1/CD80/FASLG/HLA-B/PRF1/IL1B/HLA-DOB/ICA1/IL2/HLA-DPB1/HLA-G/CPE/HLA-DRA/HLA-E/HLA-A/IL12A/HLA-DQA1/HLA-DMB/HLA-DMA/GZMB/PTPRN2
KEGG_LEISHMANIA_INFECTION	KEGG_LEISHMANIA_INFECTION	67	-0.377535	-1.4736	0.0254587221325184	0.27405565589711	0.249069851203586	2906	tags=40%, list=24%, signal=31%	CYBA/JAK2/FCGR1A/PTGS2/HLA-DOB/TGFB3/TLR2/STAT1/IFNGR2/TGFB2/NFKB1/HLA-DPB1/IRAK1/TLR4/IL4/MAP3K7/PRKCB/CR1/HLA-DRA/FOS/IL12A/HLA-DQA1/IRAK4/HLA-DMB/HLA-DMA/IL10/FCGR2A
KEGG_TOLL_LIKE_RECEPTOR_SIGNALING_PATHWAY	KEGG_TOLL_LIKE_RECEPTOR_SIGNALING_PATHWAY	96	-0.334802	-1.39114	0.0319284802043423	0.324606215410813	0.295011688437782	4018	tags=48%, list=33%, signal=33%	CXCL10/IRF7/TOLLIP/MAPK12/MAPK8/IL6/CD80/PIK3R3/CD14/IKBKG/MAP2K1/IFNA14/IKBKB/LBP/IL1B/PIK3CG/PIK3R2/IFNA17/MAP2K4/CD40/TLR2/IRF3/STAT1/NFKB1/MAPK10/IRAK1/TLR4/TBK1/IFNAR1/MAP3K7/RIPK1/TLR8/TLR6/IFNA21/IFNAR2/PIK3CD/IFNA4/FOS/IL12A/CTSK/IRAK4/CXCL11/IFNA7/IFNA8/IFNA10/RAC1
KEGG_ASTHMA	KEGG_ASTHMA	26	-0.458947	-1.48929	0.0392156862745098	0.345350479960273	0.313864686992943	2735	tags=46%, list=22%, signal=36%	EPX/IL9/HLA-DOB/CD40/FCER1A/HLA-DPB1/IL4/HLA-DRA/HLA-DQA1/HLA-DMB/HLA-DMA/IL10
KEGG_RIG_I_LIKE_RECEPTOR_SIGNALING_PATHWAY	KEGG_RIG_I_LIKE_RECEPTOR_SIGNALING_PATHWAY	64	-0.364653	-1.41328	0.0400534045393858	0.345350479960273	0.313864686992943	2189	tags=31%, list=18%, signal=26%	TRADD/IRF3/ISG15/NFKB1/MAPK10/TRAF2/TBK1/MAP3K7/RIPK1/MAP3K1/IFNA21/IFNA4/DDX3Y/IL12A/DHX58/IFNA7/CASP10/IFNA8/IFNA10/IFNW1
KEGG_LONG_TERM_DEPRESSION	KEGG_LONG_TERM_DEPRESSION	63	0.316677813853787	1.37881484709659	0.0408811757635017	0.345350479960273	0.313864686992943	1887	tags=29%, list=15%, signal=24%	GNA12/PLA2G12A/PLCB3/PLA2G1B/CRH/CACNA1A/ITPR1/GNAZ/BRAF/HRAS/PLCB1/CRHR1/PLA2G3/IGF1R/PRKCA/MAPK3/KRAS/MAPK1
KEGG_ADHERENS_JUNCTION	KEGG_ADHERENS_JUNCTION	67	0.310320727178261	1.37713193343935	0.0424482085847641	0.345350479960273	0.313864686992943	2001	tags=34%, list=16%, signal=29%	ACTN1/CTNNA2/CREBBP/CTNNB1/RAC3/SNAI2/PTPN1/SRC/INSR/FER/SMAD3/IQGAP1/EP300/TCF7L2/RAC2/SSX2IP/IGF1R/WASF3/FGFR1/RHOA/MAPK3/MAPK1/WASF1
KEGG_DILATED_CARDIOMYOPATHY	KEGG_DILATED_CARDIOMYOPATHY	82	0.286026162465818	1.34256405867376	0.0434047051316191	0.345350479960273	0.313864686992943	2276	tags=30%, list=18%, signal=25%	ITGA6/ITGA2B/ITGB3/EMD/TPM1/ITGB5/DMD/CACNB2/ADCY7/ADCY2/ITGB1/ITGAV/TNNC1/ADCY9/SGCA/CACNA2D2/TPM2/DES/TNF/TPM4/CACNG5/LMNA/TPM3/CACNA1S/PRKACA
KEGG_PANTOTHENATE_AND_COA_BIOSYNTHESIS	KEGG_PANTOTHENATE_AND_COA_BIOSYNTHESIS	14	-0.558148	-1.54864	0.0484123411517684	0.352085003530312	0.319985220349665	1687	tags=50%, list=14%, signal=43%	VNN1/DPYS/ENPP1/BCAT1/COASY/PANK4/BCAT2
