# Supplementary material for: Identification of biomarkers associated with endoplasmic reticulum stress-related cell death in osteoporosis based on bulk and single-cell transcriptomic analyses and experimental validation
Source: Research Square preprint supplement (doi:10.21203/rs.3.rs-8454279/v1), 2026-01-12
Supplement: Supplementary file 9 [file 7b574b72ee615d4b0ce1adbf.xlsx]

## Sheet: gene2tf
Supplementary Table 12
ID	Accession	Target	TargetID	Experiment
SMARCA5	8467	CAMKK2	10645	ChIP-seq
ADNP	23394	CAMKK2	10645	ChIP-seq
EGR1	1958	CAMKK2	10645	ChIP-seq
IRF4	3662	CAMKK2	10645	ChIP-seq
MLLT1	4298	CAMKK2	10645	ChIP-seq
ZNF501	115560	CAMKK2	10645	ChIP-seq
TRIM22	10346	CAMKK2	10645	ChIP-seq
BCOR	54880	CAMKK2	10645	ChIP-seq
ZNF76	7629	CAMKK2	10645	ChIP-seq
FOXM1	2305	CAMKK2	10645	ChIP-seq
GLI4	2738	CAMKK2	10645	ChIP-seq
CTCF	10664	CAMKK2	10645	ChIP-seq
HIC1	3090	CAMKK2	10645	ChIP-seq
E2F5	1875	CAMKK2	10645	ChIP-seq
THRAP3	9967	DAPK3	1613	ChIP-seq
ZNF335	63925	DAPK3	1613	ChIP-seq
SP1	6667	DAPK3	1613	ChIP-seq
KLF8	11279	DAPK3	1613	ChIP-seq
ZNF324	25799	DAPK3	1613	ChIP-seq
ZNF146	7705	DAPK3	1613	ChIP-seq
HMGN3	9324	DAPK3	1613	ChIP-seq
RARA	5914	DAPK3	1613	ChIP-seq
ZNF558	148156	DAPK3	1613	ChIP-seq
SMAD5	4090	DAPK3	1613	ChIP-seq
ZNF76	7629	DAPK3	1613	ChIP-seq
MLLT1	4298	DAPK3	1613	ChIP-seq
MXI1	4601	DAPK3	1613	ChIP-seq
ZNF382	84911	DAPK3	1613	ChIP-seq
ZNF384	171017	DAPK3	1613	ChIP-seq
ZNF623	9831	DAPK3	1613	ChIP-seq
REST	5978	DAPK3	1613	ChIP-seq
KLF9	687	DAPK3	1613	ChIP-seq
ZNF639	51193	DAPK3	1613	ChIP-seq
BCL11B	64919	DAPK3	1613	ChIP-seq
CHD1	1105	DAPK3	1613	ChIP-seq
CCNT2	905	DAPK3	1613	ChIP-seq
ZEB1	6935	DAPK3	1613	ChIP-seq
ATF1	466	DAPK3	1613	ChIP-seq
ZFP2	80108	DAPK3	1613	ChIP-seq
SP2	6668	DAPK3	1613	ChIP-seq
MAZ	4150	DAPK3	1613	ChIP-seq
ZNF263	10127	DAPK3	1613	ChIP-seq
SP7	121340	DAPK3	1613	ChIP-seq
HIC1	3090	DAPK3	1613	ChIP-seq
ZBTB33	10009	DAPK3	1613	ChIP-seq
JUND	3727	DAPK3	1613	ChIP-seq
BCL11A	53335	DAPK3	1613	ChIP-seq
MYNN	55892	DAPK3	1613	ChIP-seq
KLF1	10661	DAPK3	1613	ChIP-seq
KLF7	8609	DAPK3	1613	ChIP-seq
SSRP1	6749	DAPK3	1613	ChIP-seq
POLR2A	5430	DAPK3	1613	ChIP-seq
ZNF2	7549	DAPK3	1613	ChIP-seq
CREB3L1	90993	DAPK3	1613	ChIP-seq
SIN3A	25942	DAPK3	1613	ChIP-seq
SP3	6670	DAPK3	1613	ChIP-seq
ZBTB7A	51341	DAPK3	1613	ChIP-seq
GLIS2	84662	DAPK3	1613	ChIP-seq
