# Supplementary material for: Identification of biomarkers associated with endoplasmic reticulum stress-related cell death in osteoporosis based on bulk and single-cell transcriptomic analyses and experimental validation
Source: Research Square preprint supplement (doi:10.21203/rs.3.rs-8454279/v1), 2026-01-12
Supplement: Supplementary file 10 [file 83ffe54b6915be54f8845bc8.xlsx]

## Sheet: 06_rf_importance_sorted
Supplementary Table 8
gene
S100A9
APPL1
FOXO3
CAMKK2
UBQLN2
RAC1
BRSK2
DAPK3
PHLDA3
PTEN
