# Supplementary material for: Identification of biomarkers associated with endoplasmic reticulum stress-related cell death in osteoporosis based on bulk and single-cell transcriptomic analyses and experimental validation
Source: Research Square preprint supplement (doi:10.21203/rs.3.rs-8454279/v1), 2026-01-12
Supplement: Supplementary file 11 [file 87449a957615c40866ef1d16.xlsx]

## Sheet: 01.microcosm
Supplementary Table 11
database	mature_mirna_acc	mature_mirna_id	target_symbol	target_entrez	target_ensembl	score	type	miRNA
microcosm	MIMAT0000450	hsa-miR-149-5p	DAPK3	1613	ENSG00000167657	18.0119	predicted	hsa-miR-149-5p_DAPK3
microcosm	MIMAT0000450	hsa-miR-149-5p	DAPK3	693222	ENSG00000167657	18.0119	predicted	hsa-miR-149-5p_DAPK3
microcosm	MIMAT0003888	hsa-miR-766-3p	DAPK3	1613	ENSG00000167657	16.9451	predicted	hsa-miR-766-3p_DAPK3
microcosm	MIMAT0003888	hsa-miR-766-3p	DAPK3	693222	ENSG00000167657	16.9451	predicted	hsa-miR-766-3p_DAPK3
microcosm	MIMAT0002822	hsa-miR-512-5p	DAPK3	1613	ENSG00000167657	16.8667	predicted	hsa-miR-512-5p_DAPK3
microcosm	MIMAT0002822	hsa-miR-512-5p	DAPK3	693222	ENSG00000167657	16.8667	predicted	hsa-miR-512-5p_DAPK3
microcosm	MIMAT0003307	hsa-miR-637	DAPK3	693222	ENSG00000167657	16.7923	predicted	hsa-miR-637_DAPK3
microcosm	MIMAT0003307	hsa-miR-637	DAPK3	1613	ENSG00000167657	16.7923	predicted	hsa-miR-637_DAPK3
microcosm	MIMAT0004702	hsa-miR-339-3p	DAPK3	693222	ENSG00000167657	16.5543	predicted	hsa-miR-339-3p_DAPK3
microcosm	MIMAT0004702	hsa-miR-339-3p	DAPK3	1613	ENSG00000167657	16.5543	predicted	hsa-miR-339-3p_DAPK3
microcosm	MIMAT0000728	hsa-miR-375-3p	DAPK3	1613	ENSG00000167657	16.5267	predicted	hsa-miR-375-3p_DAPK3
microcosm	MIMAT0000728	hsa-miR-375-3p	DAPK3	693222	ENSG00000167657	16.5267	predicted	hsa-miR-375-3p_DAPK3
microcosm	MIMAT0003324	hsa-miR-661	DAPK3	693222	ENSG00000167657	16.3776	predicted	hsa-miR-661_DAPK3
microcosm	MIMAT0003324	hsa-miR-661	DAPK3	1613	ENSG00000167657	16.3776	predicted	hsa-miR-661_DAPK3
microcosm	MIMAT0004693	hsa-miR-330-5p	DAPK3	693222	ENSG00000167657	16.3175	predicted	hsa-miR-330-5p_DAPK3
microcosm	MIMAT0004693	hsa-miR-330-5p	DAPK3	1613	ENSG00000167657	16.3175	predicted	hsa-miR-330-5p_DAPK3
microcosm	MIMAT0004804	hsa-miR-615-5p	DAPK3	1613	ENSG00000167657	16.2129	predicted	hsa-miR-615-5p_DAPK3
microcosm	MIMAT0004804	hsa-miR-615-5p	DAPK3	693222	ENSG00000167657	16.2129	predicted	hsa-miR-615-5p_DAPK3
microcosm	MIMAT0000256	hsa-miR-181a-5p	DAPK3	1613	ENSG00000167657	16.1379	predicted	hsa-miR-181a-5p_DAPK3
microcosm	MIMAT0000256	hsa-miR-181a-5p	DAPK3	693222	ENSG00000167657	16.1379	predicted	hsa-miR-181a-5p_DAPK3
microcosm	MIMAT0000257	hsa-miR-181b-5p	DAPK3	693222	ENSG00000167657	16.0337	predicted	hsa-miR-181b-5p_DAPK3
microcosm	MIMAT0000257	hsa-miR-181b-5p	DAPK3	1613	ENSG00000167657	16.0337	predicted	hsa-miR-181b-5p_DAPK3
microcosm	MIMAT0000772	hsa-miR-345-5p	CAMKK2	10645	ENSG00000110931	15.9588	predicted	hsa-miR-345-5p_CAMKK2
microcosm	MIMAT0003316	hsa-miR-646	DAPK3	1613	ENSG00000167657	15.9342	predicted	hsa-miR-646_DAPK3
microcosm	MIMAT0003316	hsa-miR-646	DAPK3	693222	ENSG00000167657	15.9342	predicted	hsa-miR-646_DAPK3
microcosm	MIMAT0004984	hsa-miR-941	DAPK3	1613	ENSG00000167657	15.9296	predicted	hsa-miR-941_DAPK3
microcosm	MIMAT0004984	hsa-miR-941	DAPK3	693222	ENSG00000167657	15.9296	predicted	hsa-miR-941_DAPK3
microcosm	MIMAT0004780	hsa-miR-532-3p	DAPK3	693222	ENSG00000167657	15.8991	predicted	hsa-miR-532-3p_DAPK3
microcosm	MIMAT0004780	hsa-miR-532-3p	DAPK3	1613	ENSG00000167657	15.8991	predicted	hsa-miR-532-3p_DAPK3
microcosm	MIMAT0003283	hsa-miR-615-3p	DAPK3	693222	ENSG00000167657	15.8991	predicted	hsa-miR-615-3p_DAPK3
microcosm	MIMAT0003283	hsa-miR-615-3p	DAPK3	1613	ENSG00000167657	15.8991	predicted	hsa-miR-615-3p_DAPK3
microcosm	MIMAT0003291	hsa-miR-622	DAPK3	693222	ENSG00000167657	15.8717	predicted	hsa-miR-622_DAPK3
microcosm	MIMAT0003291	hsa-miR-622	DAPK3	1613	ENSG00000167657	15.8717	predicted	hsa-miR-622_DAPK3
microcosm	MIMAT0003304	hsa-miR-634	CAMKK2	10645	ENSG00000110931	15.8686	predicted	hsa-miR-634_CAMKK2
microcosm	MIMAT0003304	hsa-miR-634	CAMKK2	10645	ENSG00000110931	15.8225	predicted	hsa-miR-634_CAMKK2
microcosm	MIMAT0000097	hsa-miR-99a-5p	DAPK3	1613	ENSG00000167657	15.7945	predicted	hsa-miR-99a-5p_DAPK3
microcosm	MIMAT0000097	hsa-miR-99a-5p	DAPK3	693222	ENSG00000167657	15.7945	predicted	hsa-miR-99a-5p_DAPK3
microcosm	MIMAT0002821	hsa-miR-181d-5p	DAPK3	693222	ENSG00000167657	15.7214	predicted	hsa-miR-181d-5p_DAPK3
microcosm	MIMAT0002821	hsa-miR-181d-5p	DAPK3	1613	ENSG00000167657	15.7214	predicted	hsa-miR-181d-5p_DAPK3
microcosm	MIMAT0003221	hsa-miR-557	CAMKK2	10645	ENSG00000110931	15.7155	predicted	hsa-miR-557_CAMKK2
microcosm	MIMAT0004675	hsa-miR-219a-2-3p	DAPK3	1613	ENSG00000167657	15.6899	predicted	hsa-miR-219a-2-3p_DAPK3
microcosm	MIMAT0004675	hsa-miR-219a-2-3p	DAPK3	693222	ENSG00000167657	15.6899	predicted	hsa-miR-219a-2-3p_DAPK3
microcosm	MIMAT0000424	hsa-miR-128-3p	DAPK3	1613	ENSG00000167657	15.6615	predicted	hsa-miR-128-3p_DAPK3
microcosm	MIMAT0000424	hsa-miR-128-3p	DAPK3	693222	ENSG00000167657	15.6615	predicted	hsa-miR-128-3p_DAPK3
microcosm	MIMAT0000689	hsa-miR-99b-5p	DAPK3	693222	ENSG00000167657	15.5853	predicted	hsa-miR-99b-5p_DAPK3
microcosm	MIMAT0000689	hsa-miR-99b-5p	DAPK3	1613	ENSG00000167657	15.5853	predicted	hsa-miR-99b-5p_DAPK3
microcosm	MIMAT0004780	hsa-miR-532-3p	DAPK3	693222	ENSG00000167657	15.5853	predicted	hsa-miR-532-3p_DAPK3
microcosm	MIMAT0004780	hsa-miR-532-3p	DAPK3	1613	ENSG00000167657	15.5853	predicted	hsa-miR-532-3p_DAPK3
microcosm	MIMAT0002861	hsa-miR-518e-3p	DAPK3	1613	ENSG00000167657	15.5564	predicted	hsa-miR-518e-3p_DAPK3
microcosm	MIMAT0002861	hsa-miR-518e-3p	DAPK3	693222	ENSG00000167657	15.5564	predicted	hsa-miR-518e-3p_DAPK3
microcosm	MIMAT0002874	hsa-miR-503-5p	DAPK3	693222	ENSG00000167657	15.5132	predicted	hsa-miR-503-5p_DAPK3
microcosm	MIMAT0002874	hsa-miR-503-5p	DAPK3	1613	ENSG00000167657	15.5132	predicted	hsa-miR-503-5p_DAPK3
microcosm	MIMAT0000231	hsa-miR-199a-5p	DAPK3	693222	ENSG00000167657	15.4091	predicted	hsa-miR-199a-5p_DAPK3
microcosm	MIMAT0000231	hsa-miR-199a-5p	DAPK3	1613	ENSG00000167657	15.4091	predicted	hsa-miR-199a-5p_DAPK3
microcosm	MIMAT0000098	hsa-miR-100-5p	DAPK3	693222	ENSG00000167657	15.3761	predicted	hsa-miR-100-5p_DAPK3
microcosm	MIMAT0000098	hsa-miR-100-5p	DAPK3	1613	ENSG00000167657	15.3761	predicted	hsa-miR-100-5p_DAPK3
microcosm	MIMAT0004814	hsa-miR-654-3p	DAPK3	1613	ENSG00000167657	15.3761	predicted	hsa-miR-654-3p_DAPK3
microcosm	MIMAT0004814	hsa-miR-654-3p	DAPK3	693222	ENSG00000167657	15.3761	predicted	hsa-miR-654-3p_DAPK3
microcosm	MIMAT0003279	hsa-miR-611	DAPK3	693222	ENSG00000167657	15.3049	predicted	hsa-miR-611_DAPK3
microcosm	MIMAT0003279	hsa-miR-611	DAPK3	1613	ENSG00000167657	15.3049	predicted	hsa-miR-611_DAPK3
microcosm	MIMAT0004552	hsa-miR-139-3p	DAPK3	693222	ENSG00000167657	15.2715	predicted	hsa-miR-139-3p_DAPK3
microcosm	MIMAT0004552	hsa-miR-139-3p	DAPK3	1613	ENSG00000167657	15.2715	predicted	hsa-miR-139-3p_DAPK3
microcosm	MIMAT0000258	hsa-miR-181c-5p	DAPK3	1613	ENSG00000167657	15.2715	predicted	hsa-miR-181c-5p_DAPK3
microcosm	MIMAT0000258	hsa-miR-181c-5p	DAPK3	693222	ENSG00000167657	15.2715	predicted	hsa-miR-181c-5p_DAPK3
microcosm	MIMAT0004697	hsa-miR-151a-5p	DAPK3	693222	ENSG00000167657	15.136	predicted	hsa-miR-151a-5p_DAPK3
microcosm	MIMAT0004697	hsa-miR-151a-5p	DAPK3	1613	ENSG00000167657	15.136	predicted	hsa-miR-151a-5p_DAPK3
microcosm	MIMAT0002863	hsa-miR-518a-3p	DAPK3	693222	ENSG00000167657	14.9577	predicted	hsa-miR-518a-3p_DAPK3
microcosm	MIMAT0002863	hsa-miR-518a-3p	DAPK3	1613	ENSG00000167657	14.9577	predicted	hsa-miR-518a-3p_DAPK3
microcosm	MIMAT0002844	hsa-miR-518b	DAPK3	1613	ENSG00000167657	14.7485	predicted	hsa-miR-518b_DAPK3
microcosm	MIMAT0002844	hsa-miR-518b	DAPK3	693222	ENSG00000167657	14.7485	predicted	hsa-miR-518b_DAPK3
microcosm	MIMAT0003279	hsa-miR-611	DAPK3	693222	ENSG00000167657	14.6802	predicted	hsa-miR-611_DAPK3
microcosm	MIMAT0003279	hsa-miR-611	DAPK3	1613	ENSG00000167657	14.6802	predicted	hsa-miR-611_DAPK3
microcosm	MIMAT0002864	hsa-miR-518d-3p	DAPK3	1613	ENSG00000167657	14.5053	predicted	hsa-miR-518d-3p_DAPK3
microcosm	MIMAT0002864	hsa-miR-518d-3p	DAPK3	693222	ENSG00000167657	14.5053	predicted	hsa-miR-518d-3p_DAPK3
