# Supplementary material for: Identification of biomarkers associated with endoplasmic reticulum stress-related cell death in osteoporosis based on bulk and single-cell transcriptomic analyses and experimental validation
Source: Research Square preprint supplement (doi:10.21203/rs.3.rs-8454279/v1), 2026-01-12
Supplement: Supplementary file 12 [file 96394c591c24945fe515d6ff.xlsx]

## Sheet: drug-gene
Supplementary Table 14
Gene	Drug
CAMKK2	Bosutinib
CAMKK2	Sunitinib
CAMKK2	Axitinib
CAMKK2	Crizotinib
CAMKK2	Nintedanib
CAMKK2	Cdk1/2_Inhibitor_III
CAMKK2	JAK3_Inhibitor_VI
CAMKK2	SYK_Inhibitor_I
CAMKK2	Volasertib
CAMKK2	Crenolanib
CAMKK2	PKR_Inhibitor
CAMKK2	alprostadil
CAMKK2	captopril
CAMKK2	cephaeline
CAMKK2	cicloheximide
CAMKK2	deptropine
CAMKK2	digitoxigenin
CAMKK2	emetine
CAMKK2	etifenin
CAMKK2	flunixin
CAMKK2	fulvestrant
CAMKK2	latamoxef
CAMKK2	neostigmine_bromide
CAMKK2	puromycin
CAMKK2	thiostrepton
CAMKK2	Adehl
CAMKK2	(17S)_17_hydroxy_13,17_dimethyl_1,2,6,7,8,14,15,16_octahydrocyclopenta[a]phenanthren_3_one
CAMKK2	17_Hydroxyandrostan_3_one
CAMKK2	calcitriol
CAMKK2	genistein
CAMKK2	estradiol
DAPK3	Gefitinib
DAPK3	Sunitinib
DAPK3	JAK_Inhibitor_I
DAPK3	Ruxolitinib
DAPK3	Palbociclib
DAPK3	Momelotinib
DAPK3	azacitidine
DAPK3	budesonide
DAPK3	camptothecin
DAPK3	captopril
DAPK3	cephaeline
DAPK3	cytochalasin_B
DAPK3	danazol
DAPK3	digitoxigenin
DAPK3	digoxigenin
DAPK3	doxorubicin
DAPK3	emetine
DAPK3	helveticoside
DAPK3	lanatoside_C
DAPK3	parthenolide
DAPK3	proscillaridin
DAPK3	vorinostat
DAPK3	cyclosporin_A
DAPK3	(_)_Epigallocatechin_gallate
DAPK3	Pirinixic_acid
DAPK3	Decitabine
DAPK3	1,9_Pyrazoloanthrone
DAPK3	VALPROIC_ACID
DAPK3	methotrexate
