# Supplementary material for: Identification of biomarkers associated with endoplasmic reticulum stress-related cell death in osteoporosis based on bulk and single-cell transcriptomic analyses and experimental validation
Source: Research Square preprint supplement (doi:10.21203/rs.3.rs-8454279/v1), 2026-01-12
Supplement: Supplementary file 13 [file a3e84ec0be13e0ce300cebcc.xlsx]

## Sheet: 04.spearman_correlate(immune_ce
Supplementary Table 13
.rownames	.colnames	r	p
Activated dendritic cell	Activated dendritic cell	1	0
Mast cell	Activated dendritic cell	0.430403187998125	7.92508859823136e-05
Plasmacytoid dendritic cell	Activated dendritic cell	0.106821378340366	0.344905170321333
Activated dendritic cell	Mast cell	0.430403187998125	7.92508859823136e-05
Mast cell	Mast cell	1	0
Plasmacytoid dendritic cell	Mast cell	0.0481247069854665	0.671031635253804
Activated dendritic cell	Plasmacytoid dendritic cell	0.106821378340366	0.344905170321333
Mast cell	Plasmacytoid dendritic cell	0.0481247069854665	0.671031635253804
Plasmacytoid dendritic cell	Plasmacytoid dendritic cell	1	0
CAMKK2	Activated dendritic cell	0.239592123769339	0.0325467963558799
DAPK3	Activated dendritic cell	0.237552742616034	0.0340884755957109
CAMKK2	Mast cell	-0.0638303	0.573050185608595
DAPK3	Mast cell	0.126371308016878	0.263410168562888
CAMKK2	Plasmacytoid dendritic cell	0.137248007501172	0.224252216958025
DAPK3	Plasmacytoid dendritic cell	0.245241443975621	0.0285801350560365
