# Supplementary material for: Identification of biomarkers associated with endoplasmic reticulum stress-related cell death in osteoporosis based on bulk and single-cell transcriptomic analyses and experimental validation
Source: Research Square preprint supplement (doi:10.21203/rs.3.rs-8454279/v1), 2026-01-12
Supplement: Supplementary file 14 [file de93f0129c75d6b45275a52f.xlsx]

## Sheet: 01.lasso_gene_adj
Supplementary Table 6
lasso_gene
FOXO3
BRSK2
UBQLN2
RAC1
EGFR
RIPK2
CAMKK2
PTEN
S100A8
S100A9
HMOX1
APPL1
TP63
CP
DAPK3
CCND1
PHLDA3
