# Supplementary material for: Identification of biomarkers associated with endoplasmic reticulum stress-related cell death in osteoporosis based on bulk and single-cell transcriptomic analyses and experimental validation
Source: Research Square preprint supplement (doi:10.21203/rs.3.rs-8454279/v1), 2026-01-12
Supplement: Supplementary file 15 [file f54c446200727e78c2a1c156.xlsx]

## Sheet: 01_venn_28
Supplementary Table 3
gene
FOXO3
BRSK2
SEC22B
UBQLN2
RAC1
EGFR
RIPK2
SGPL1
CAMKK2
PAFAH1B2
GLA
PTEN
S100A8
S100A9
HMOX1
HSPB1
APPL1
CTSD
TP63
CP
FXN
DAPK3
DAP3
SLC25A5
CCND1
PHLDA3
CTNNB1
TRAP1
